# Supplementary material for: Toward Molecular Textiles: Synthesis and Characterization of Molecular Patches
Source: PubMed Central journal article supplement — Chemistry. 2024 Nov 5;30(69):e202402866. doi: 10.1002/chem.202402866 (PMC11632409; doi:10.1002/chem.202402866), 2024-11-05
Supplement: CHEM-30-e202402866-s001.pdf [file CHEM-30-e202402866-s001.pdf]

# Chemistry–A European Journal

Supporting Information

## **Toward Molecular Textiles: Synthesis and Characterization of Molecular Patches**

Camiel C. E. Kroonen, Antoine Hinaut, Adriano D'Addio, Alessandro Prescimone,  
Daniel Häussinger, Gema Navarro-Marín, Olaf Fuhr, Dieter Fenske, Ernst Meyer, and  
Marcel Mayor\*

## Supporting information

### **Towards Molecular Textiles: Synthesis and Characterization of Molecular Patches**

C.C.E. Kroonen, A. Hinaut., A. D'Addio, A. Prescimone, D. Häussinger, G. Navarro-Marín, O. Fuhr, D. Fenske, E. Meyer, M. Mayor\*

## Table of Contents

|                                             |    |
|---------------------------------------------|----|
| General.....                                | 3  |
| Synthesis.....                              | 3  |
| Physico-Chemical Analysis.....              | 9  |
| (Chiro)-Optical analysis.....               | 9  |
| TD-DFT calculation.....                     | 11 |
| Oligomerization.....                        | 12 |
| In-solution synthesis.....                  | 12 |
| On-surface analysis with nc-AFM.....        | 15 |
| Geometry optimizations.....                 | 17 |
| Crystallographic Data.....                  | 25 |
| Compound 3 (CCDC-2371751).....              | 25 |
| Compound C <sub>1</sub> (CCDC-2374177)..... | 27 |
| References.....                             | 29 |
| NMR and HR-ESI-MS spectra.....              | 30 |

## General

All chemicals and solvents were purchased from SigmaAldrich, Acros, Apollo Scientific, Alfa Aesar and Fluorochem and used as received. NMR solvents were obtained from CIL Cambridge Isotope Laboratories, Inc., Acros, Sigma-Aldrich, or Apollo Scientific. Dry solvents were used as crown capped and purchased from Acros and Sigma-Aldrich. Column chromatography was performed manually or on a Biotage Isolera using SilicaFlashR P60 from Silicycle with particle size of 40-63  $\mu\text{m}$  (230-400 mesh) as stationary phase. TLC was performed with silica gel 60 F254 glass plates purchased from Merck. NMR experiments were performed on Bruker Avance III NMR spectrometers operating at 250, 400 or 500 MHz proton frequencies. The instruments were equipped with a direct-observe 5 mm BBFO smart probe (250, 400 MHz), or an indirect-detection 5 mm BBI probe (500 MHz). All probes were equipped with actively shielded z-gradients (10 A). The chemical shifts are reported in ppm relative to TMS or referenced to residual solvent peak and the J values are given in Hz. Infrared spectra were recorded neat with an ATR equipped Shimadzu IRTacer-100. High-resolution mass spectra (HR-MS) were measured with a Bruker Maxis 4G ESI-TOF instrument. CD measurements were performed on a JASCO J-1500 CD Spectrophotometer in a 1 cm quartz glass cuvette. For analytical HPLC, a Shimadzu LC-20AT HPLC was used, equipped with a diode-array UV/Vis detector (SPD-M20 A VP from Shimadzu,  $\lambda=200\text{--}600$  nm) and a column oven Shimadzu CTO-20AC. For preparative HPLC, a Shimadzu LC-20AP HPLC was used equipped with a diode-array UV/Vis detector (SPD-M20 A VP from Shimadzu,  $\lambda=200\text{--}600$  nm). The used column for analytical separation on chiral stationary phase was a Chiralpak IG, 5  $\mu\text{m}$ , 4.6 $\times$ 250 mm, Daicel Chemical Industries Ltd and for preparative separation, Chiralpak IG, 5  $\mu\text{m}$ , 30 $\times$ 250 mm, Daicel Chemical Industries Ltd. All DFT calculations were performed using Gaussian 09, Revision E 0.1.<sup>[1]</sup>

## Synthesis

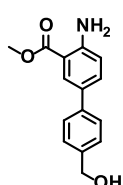

**Compound 5:** A 100 mL *Schlenk* flask was charged with methyl 2-amino-5-bromobenzoate **4** (3.0 g, 1 equiv.),  $\text{Na}_2\text{CO}_3$  (3.2 g, 2.3 equiv.), 4-(Hydroxymethyl) phenylboronic acid (0.72 g, 1.1 equivl). The solids were dispersed in 65 mL Tol/ $\text{H}_2\text{O}$ /MeOH (4:1.5:1) and degassed with argon for 15 minutes.  $\text{Pd}(\text{PPh}_3)_4$  (5 mol %) was added, tube sealed and the mixture was heated at 80°C for 5 hours. The reaction mixture was cooled down to room temperature and partitioned between EtOAc and water. The organic phase was washed with water, brine, dried over sodium sulfate and concentrated in vacuo. The crude was purified by  $\text{SiO}_2$  column chromatography (cyclohexane:EtOAc (7:3 v/v)) obtaining the product in the 2<sup>nd</sup> band as a white solid (2.2 gr, 65%).

**$^1\text{H-NMR}$ :** (500 MHz,  $\text{CD}_2\text{Cl}_2$ )  $\delta$  8.13 (d,  $J = 2.3$  Hz, 1H), 7.58 – 7.54 (m, 3H), 7.41 – 7.38 (m, 2H), 6.77 (d,  $J = 8.5$  Hz, 1H), 5.82 (s, 2H), 4.69 (d,  $J = 5.4$  Hz, 3H), 3.88 (s, 3H), 1.74 (t,  $J = 5.9$  Hz, 1H).

**$^{13}\text{C-NMR}$ :** (126 MHz,  $\text{CD}_2\text{Cl}_2$ ): (126 MHz,  $\text{CD}_2\text{Cl}_2$ )  $\delta$  168.78, 149.03, 139.56, 132.57, 129.19, 128.64, 127.38, 126.08, 117.12, 110.90, 64.81, 51.50. Signal 168.78 is extracted from 2D-NMR.

**HR-ESI-MS (+):**  $m/z$  calculated for  $\text{C}_{15}\text{H}_{15}\text{NNaO}_3$  [ $\text{M}+\text{Na}$ ]<sup>+</sup>; 280.0944 found 280.0941.

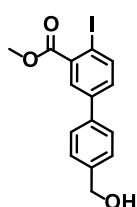

**Compound 6:** To a solution of p-TsOH $\cdot$ H $_2$ O (890 mg, 3 equiv.) in acetonitrile (12 mL) amine **5** (404, mg 1 equiv.) was added. The resulting suspension was cooled to 0°C and a solution of  $\text{NaNO}_2$  (213 mg, 2 equiv.) and KI (640 mg, 2.5 equiv.) in  $\text{H}_2\text{O}$  (4 mL) was gradually added. The reaction mixture was allowed to warm to room temperature and stirred for 16 h, before sat.  $\text{NaHCO}_3$  and sat.  $\text{NaHSO}_3$  solution where added. The resulting mixture was extracted with EtOAc (3 times), the organic fractions were combined, dried over sodium sulfate and concentrated under reduced pressure. The crude was purified by flash column chromatography ( $\text{SiO}_2$ , cyclohexane:EtOAc 8:2  $\rightarrow$  7:3 v/v) obtaining the product as a white solid (520 mg, 90%).

**$^1\text{H-NMR}$ :** (500 MHz,  $\text{CD}_2\text{Cl}_2$ ):  $\delta$  8.05 (d,  $J = 8.2$  Hz, 1H), 8.01 (d,  $J = 2.4$  Hz, 1H), 7.63 – 7.57 (m, 2H), 7.49 – 7.43 (m, 2H), 7.41 (dd,  $J = 8.2, 2.4$  Hz, 1H), 4.72 (d,  $J = 5.3$  Hz, 2H), 3.93 (s, 3H), 1.85 (t,  $J = 5.7$  Hz, 1H).



**<sup>13</sup>C-NMR {1H}**: (126 MHz, CD<sub>2</sub>Cl<sub>2</sub>): δ 167.25, 142.07, 141.75, 141.21, 138.42, 136.27, 131.34, 129.66, 127.86, 127.29, 92.59, 65.01, 52.84.

**HR-ESI-MS (+)**: *m/z* calculated for C<sub>15</sub>H<sub>14</sub>IO<sub>3</sub> [M+H]<sup>+</sup>; 368.9982 found 368.9980.

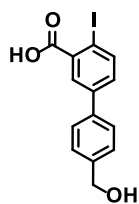

**Compound 7**: To a solution of ester **6** (478 mg, 1 equiv.) in MeOH (4 mL) and aqueous 1 M NaOH (2.4 mL, 3 equiv) was heated at reflux for 2 hours. After the reaction was cooled to room temperature it was diluted with 10 mL H<sub>2</sub>O and was acidified to pH 2 with concentrated HCl. The mixture was extracted with EtOAc (3 × 10 mL), and the combined organic portions were washed with brine, dried (Na<sub>2</sub>SO<sub>4</sub>), filtered and concentrated in vacuo to obtain iodobenzene-2-carboxylic acid **7** (449 mg, 98%) as a white solid.

**<sup>1</sup>H-NMR**: (500 MHz, Acetone-d<sub>6</sub>) δ 11.67 (s, 1H), 8.16 – 8.05 (m, 2H), 7.76 – 7.62 (m, 2H), 7.56 (dd, *J* = 8.2, 2.4 Hz, 1H), 7.54 – 7.41 (m, 2H), 4.70 (s, 2H), 4.29 (s, 1H).

**<sup>13</sup>C-NMR {1H}**: (126 MHz, Acetone-d<sub>6</sub>) δ 166.92, 142.77, 141.75, 140.96, 137.30, 136.59, 130.77, 128.80, 127.23, 126.54, 91.66, 63.32.

**HR-ESI-MS (+)**: *m/z* calculated for C<sub>14</sub>H<sub>11</sub>IO<sub>3</sub>Na [M+Na]<sup>+</sup>; 376.9645 found 376.9640.

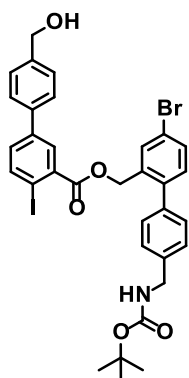

**Compound 2**: To a 100 mL round-bottom flask acid **7** (266 mg, 1 equiv.), benzyl bromide **7'** (360 mg, 1.05 equiv.) and CsF (185 mg, 1.6 equiv.) were added and put under inert atmosphere. 5 mL dry DMF was added and the resulting mixture was stirred at r.t. for 16 hours. The mixture was diluted with EtOAc, washed 3 times with brine, dried with sodium sulfate and concentrated under reduced pressure. The corresponding crude was purified with SiO<sub>2</sub> column chromatography (CH<sub>2</sub>Cl<sub>2</sub>:EtOAc 100% → 8:2 v/v) obtaining the product as a light yellow solid (544 mg, 99 %).

**<sup>1</sup>H-NMR**: (500 MHz, DMSO-d<sub>6</sub>) δ 8.05 (d, *J* = 8.2 Hz, 1H), 7.87 – 7.85 (m, 2H), 7.66 – 7.62 (m, 3H), 7.57 (dd, *J* = 8.2, 2.4 Hz, 1H), 7.46 – 7.40 (m, 3H), 7.39 – 7.36 (m, 2H), 7.34 – 7.31 (m, 2H), 7.28 (d, *J* = 8.2 Hz, 1H), 5.28 (s, 2H), 5.25 (t, *J* = 5.7 Hz, 1H), 4.55 (d, *J* = 5.8 Hz, 2H), 4.17 (d, *J* = 6.2 Hz, 2H), 1.40 (s, 9H).

**<sup>13</sup>C-NMR {1H}**: (126 MHz, DMSO) δ 166.11, 155.83, 142.84, 141.08, 140.46, 140.00, 139.85, 137.00, 136.29, 136.22, 135.17, 132.07, 131.88, 131.30, 130.85, 128.74, 127.94, 127.12, 127.08, 126.29, 120.62, 92.55, 77.84, 64.51, 62.49, 43.06, 28.25.

**HR-ESI-MS (+)**: *m/z* calculated for C<sub>33</sub>H<sub>31</sub>BrINO<sub>5</sub>Na [M+Na]<sup>+</sup>; 750.0322 found 750.0315.

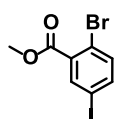

**Compound 9**: 2-bromo-5-iodobenzoic acid **8** (5.5 g, 1 equiv.) was dissolved in 120 mL methanol and 2.5 mL of conc. sulfuric acid (3 equiv.) was added. The reaction was heated at reflux for 4 hours before cooled down, diluted with 250 mL H<sub>2</sub>O and extracted 3 times with TBME. The combined organics were washed with 50 mL of sat. NaHCO<sub>3</sub>, 50 mL of H<sub>2</sub>O, and 2 x with 50 mL of sat. NaCl. The organics were dried with Na<sub>2</sub>SO<sub>4</sub> and filtered. The solvent was removed under vacuum yielding the compound as a yellow solid (5.0 gr, 86 %), which was used in the next step without further purification.

**<sup>1</sup>H-NMR**: (400 MHz, CD<sub>2</sub>Cl<sub>2</sub>): (400 MHz, CD<sub>2</sub>Cl<sub>2</sub>) δ 8.10 (d, *J* = 2.3 Hz, 1H), 7.65 (dd, *J* = 8.4, 2.2 Hz, 1H), 7.40 (d, *J* = 8.4 Hz, 1H), 3.90 (s, 3H).<sup>[2]</sup>

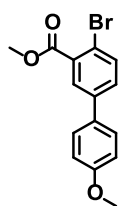

**Compound 10**: A 50 mL Schlenk tube was charged with methyl 2-bromo-5-iodobenzoate **9** (1.02 gr, 1 equiv.), (4-methoxyphenyl)boronic acid (505 mg, 1.2 equiv.) and K<sub>2</sub>CO<sub>3</sub> (1.23 gr, 3 equiv.) and cycled between vacuum and argon for three times. The solids were dispersed in 30 mL DME/MeOH/H<sub>2</sub>O (4:1:1) and the mixture was degassed for 15 minutes with argon. PdCl<sub>2</sub>(dppf) (5 mol %) was added under inert atmosphere and the mixture was heated up to 60°C. After 16 hours the reaction mixture was cooled down to r.t., filtered over silica, diluted with EtOAc and washed with H<sub>2</sub>O. The organic phase was collected, dried over Na<sub>2</sub>SO<sub>4</sub> and concentrated under reduced pressure. The obtained crude was purified via SiO<sub>2</sub> column chromatography (cyclohexane:EtOAc 9:1 v/v) obtaining the product in the 1<sup>st</sup> band as a white solid (670 mg, 71%).

**<sup>1</sup>H-NMR:** (500 MHz, CD<sub>2</sub>Cl<sub>2</sub>) δ 7.96 (d, *J* = 2.4 Hz, 1H), 7.69 (d, *J* = 8.3 Hz, 1H), 7.57 – 7.51 (m, 3H), 7.04 – 6.93 (m, 2H), 3.93 (s, 3H), 3.84 (s, 3H).

**<sup>13</sup>C-NMR {1H}:** (126 MHz, CD<sub>2</sub>Cl<sub>2</sub>) δ 166.91, 160.29, 140.45, 134.96, 133.02, 131.59, 130.85, 129.57, 128.36, 119.76, 114.79, 55.75, 52.79.

**HR-ESI-MS (+):** *m/z* calculated for C<sub>15</sub>H<sub>13</sub>BrO<sub>3</sub>Na [M+Na]<sup>+</sup>; 342.9940 found 342.9941.

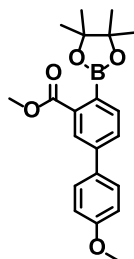

**Compound 11:** Bromide **10** (437 mg, 1 equiv.), bis(pinacolato)diboron (400 mg, 1.15 equiv.) and KOAc (420 mg, 3 equiv.) were added to a 25 mL flame dried *Schlenk* flask and cycled between vacuum and argon 3 times. Anhydrous dioxane (8 mL) was added and the suspension was degassed for 15 minutes with argon. PdCl<sub>2</sub>(dppf) (50 mg, 5 mol%) was added and the tube was sealed and heated at 90°C for 6 hours. The reaction mixture was cooled to room temperature, filtered over silica, flushed down with EtOAc and concentrated under reduced pressure. The crude was further purified by flash column chromatography (SiO<sub>2</sub>, Cyclohexane:EtOAc (9:1)) obtaining the product in the 2<sup>nd</sup> band as

a white solid (424 mg, 85%).

**<sup>1</sup>H-NMR:** (500 MHz, CD<sub>2</sub>Cl<sub>2</sub>) δ 8.13 (dd, *J* = 1.9, 0.6 Hz, 1H), 7.74 (dd, *J* = 7.7, 1.8 Hz, 1H), 7.62 – 7.57 (m, 2H), 7.55 (dd, *J* = 7.7, 0.6 Hz, 1H), 7.03 – 6.97 (m, 2H), 3.92 (s, 3H), 3.85 (s, 3H), 1.39 (s, 12H).

**<sup>13</sup>C-NMR {1H}:** (126 MHz, CD<sub>2</sub>Cl<sub>2</sub>) δ 168.86, 160.14, 141.91, 134.96, 133.33, 132.65, 129.92, 128.49, 127.16, 114.69, 84.36, 55.72, 52.60, 25.06.

**HR-ESI-MS (+):** *m/z* calculated for C<sub>21</sub>H<sub>26</sub>BO<sub>5</sub> [M+H]<sup>+</sup>; 369.1872, found 369.1865.

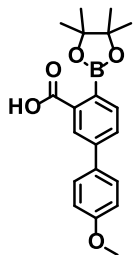

**Compound 12:** To a solution of methyl ester **11** (352 mg, 1 equiv.) in 9 mL THF a solution of LiOH•H<sub>2</sub>O (120 mg, 3 equiv.) in 2 mL H<sub>2</sub>O was added under inert atmosphere. The resulting mixture was stirred at room temperature for 1 h when TLC indicated full consumption of the starting material. The mixture was diluted with H<sub>2</sub>O, acidified with 1M HCl followed by extraction with TBME (3 times). The organic extracts were combined and washed with brine, dried (Na<sub>2</sub>SO<sub>4</sub>) and concentrated to give the product as a white solid (339 mg, quant.).

**<sup>1</sup>H-NMR:** (500 MHz, DMSO-d<sub>6</sub>) δ 8.01 (d, *J* = 1.8 Hz, 1H), 7.80 (dd, *J* = 7.7, 1.8 Hz, 1H), 7.67 – 7.62 (m, 2H), 7.47 (d, *J* = 7.6 Hz, 1H), 7.07 – 7.02 (m, 2H), 3.80 (s, 3H), 1.30 (s, 12H).

**<sup>13</sup>C-NMR {1H}:** (126 MHz, DMSO-d<sub>6</sub>) δ 169.18, 159.23, 140.17, 135.29, 132.16, 131.50, 129.26, 127.84, 125.16, 114.50, 82.89, 55.21, 24.59.

**HR-ESI-MS (+):** *m/z* calculated for C<sub>20</sub>H<sub>24</sub>BO<sub>5</sub> [M+H]<sup>+</sup>; 355.1715 found 355.1715.

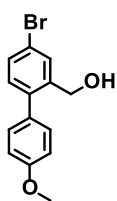

**Compound 14:** To a 50 mL *Schlenk* tube 2-iodo-4-bromobenzyl alcohol **13** (522 mg, 1 equiv.), 4-methoxyphenylboronic acid (320 mg, 1.2 equiv.) and K<sub>2</sub>CO<sub>3</sub> (720 mg, 3 equiv.) were added and cycled between vacuum and argon for three times. The solids were dispersed in 25 mL DME/H<sub>2</sub>O (4:1) and the mixture was degassed for 15 minutes with argon. PdCl<sub>2</sub>(dppf) (0.05 equiv.) was added under inert atmosphere and the mixture was heated up to 60°C. After 2.5 hours the reaction mixture was cooled down to r.t., filtered over celite, diluted in EtOAc and washed with H<sub>2</sub>O. The organic phase was collected dried with Na<sub>2</sub>SO<sub>4</sub> and concentrated under vacuum. The obtained crude was purified via SiO<sub>2</sub> column chromatography (Cyclohexane:EtOAc 9:1 → 8:2 v/v) obtaining the product as a white solid (426 mg, 87 %).

**<sup>1</sup>H-NMR:** (500 MHz, CD<sub>2</sub>Cl<sub>2</sub>): δ 7.71 (d, *J* = 2.2 Hz, 1H), 7.46 (dd, *J* = 8.2, 2.2 Hz, 1H), 7.28 – 7.22 (m, 2H), 7.14 (d, *J* = 8.1 Hz, 1H), 6.99 – 6.92 (m, 2H), 4.56 (d, *J* = 5.7 Hz, 2H), 3.84 (s, 3H), 1.73 (t, *J* = 5.8 Hz, 1H).

**<sup>13</sup>C-NMR {1H}:** (126 MHz, CD<sub>2</sub>Cl<sub>2</sub>): 159.65, 141.09, 140.10, 132.14, 132.09, 131.20, 130.69, 130.48, 121.46, 114.13, 62.85, 55.69.

**HR-ESI-MS (+):** *m/z* calculated for C<sub>14</sub>H<sub>13</sub>BrO<sub>2</sub>Na [M+Na]<sup>+</sup>; 314.9991 found 314.9988

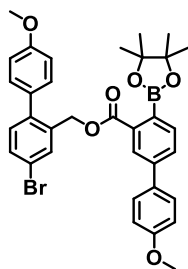

**Compound 3:** To a solution of acid **12** (175 mg, 1 equiv.) and alcohol **14** (145 mg, 1 equiv.) in 4 mL anhydrous CH<sub>2</sub>Cl<sub>2</sub>:DMF (3:1), N,N'-dicyclohexylcarbodiimide (108 mg, 1.05 equiv.) and 4-dimethylaminopyridine (6.1 mg, 0.1 equiv.) were added under inert atmosphere. The mixture was stirred at room temperature for 1.5 hours before filtered over a celite pad. The filtrate was washed with H<sub>2</sub>O 3 times, dried with Na<sub>2</sub>SO<sub>4</sub>, plugged over silica and concentrated under reduced pressure. The crude was purified via SiO<sub>2</sub> column chromatography (pentane:CH<sub>2</sub>Cl<sub>2</sub> 2:8 v/v), yielding the product in the 1<sup>st</sup> band as a colorless wax (140 mg, 44%).

**<sup>1</sup>H-NMR:** (500 MHz, CD<sub>2</sub>Cl<sub>2</sub>) δ 8.07 (d, *J* = 1.8 Hz, 1H), 7.76 (d, *J* = 2.2 Hz, 1H), 7.74 (dd, *J* = 7.7, 1.9 Hz, 1H), 7.60 – 7.57 (m, 2H), 7.55 (d, *J* = 7.7 Hz, 1H), 7.52 (dd, *J* = 8.2, 2.2 Hz, 1H), 7.32 – 7.28 (m, 2H), 7.20 (d, *J* = 8.2 Hz, 1H), 7.03 – 6.98 (m, 2H), 6.98 – 6.93 (m, 2H), 5.27 (s, 2H), 3.85 (s, 3H), 3.81 (s, 3H), 1.35 (s, 12H)

**<sup>13</sup>C-NMR {1H}:** (126 MHz, CD<sub>2</sub>Cl<sub>2</sub>) δ 167.99, 160.16, 159.75, 141.92, 141.34, 136.13, 134.70, 133.34, 132.63, 132.29, 131.97, 131.57, 130.55, 130.18, 128.53, 127.09, 121.37, 114.70, 114.23, 84.37, 64.92, 55.73, 55.67, 24.99.

**HR-ESI-MS (+):** *m/z* calculated for C<sub>34</sub>H<sub>34</sub>BBro<sub>6</sub>Na [M+Na]<sup>+</sup>; 651.1530 found 651.1515.

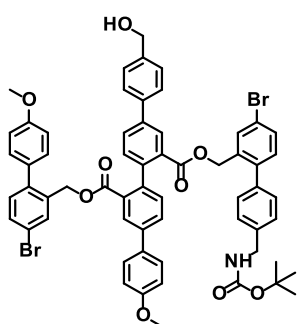

**Compound 1:** A 25 mL Schlenk tube was charged with boronic acid **3** (165 mg, 1 equiv.), iodo **2** (182 mg, 1 equiv.) and K<sub>2</sub>CO<sub>3</sub> (104 mg, 3 equiv.). The solids were dispersed in a 10 mL THF/H<sub>2</sub>O (4:1; v/v) mixture. The resulting suspension was degassed with argon followed by the addition of PdCl<sub>2</sub>(dppf) (14 mg, 7 mol%). The mixture was heated at 60°C for 5 hours before cooled down to room temperature and filtered over a silica pad. The silica pad was flushed down with EtOAc and the filtrate was washed with H<sub>2</sub>O. The organic layer was collected, dried with sodium sulfate and concentrated before subjected to Silica column chromatography using Cyclohexane:EtOAc (8:2 to 7:3; v/v) as eluent. The product was obtained as

a white solid (222 mg, 82 %) after stripping of the volatiles.

**<sup>1</sup>H-NMR:** (500 MHz, CD<sub>2</sub>Cl<sub>2</sub>): δ 8.10 – 8.09 (m, 1H), 8.07 (s, 1H), 7.72 – 7.64 (m, 2H), 7.61 – 7.57 (m, 2H), 7.57 – 7.53 (m, 2H), 7.51 – 7.46 (m, 2H), 7.37 – 7.19 (m, 8H), 7.16 – 7.11 (m, 2H), 7.10 – 7.06 (m, 2H), 7.04 – 6.98 (m, 4H), 6.87 – 6.83 (m, 2H), 4.99 – 4.95 (m, 4H), 4.92 (s, 1H), 4.75 (s, 2H), 4.24 (d, *J* = 6.0 Hz, 2H), 3.87 (s, 3H), 3.76 (s, 3H), 1.92 (s, 1H), 1.44 (s, 9H).

**<sup>13</sup>C-NMR {1H}:** (126 MHz, CD<sub>2</sub>Cl<sub>2</sub>): δ 167.14, 167.00, 160.10, 159.64, 142.05, 140.92, 139.95, 139.22, 139.19, 138.94, 138.48, 135.34, 132.65, 132.58, 132.12, 131.96, 131.91, 131.74, 131.53, 131.45, 131.40, 131.30, 130.49, 130.32, 130.30, 130.12, 129.68, 129.51, 128.82, 128.47, 128.33, 127.76, 127.73, 127.51, 121.51, 121.11, 114.62, 114.13, 79.73, 65.14, 64.50, 64.44, 55.75, 55.64, 28.53.

**HR-ESI-MS (+):** *m/z* calculated for C<sub>61</sub>H<sub>53</sub>Br<sub>2</sub>NO<sub>9</sub>Na [M+Na]<sup>+</sup>; 1124.1979 found 1124.1987

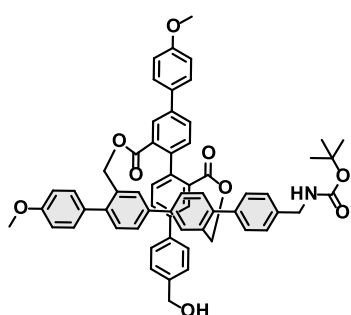

**Compound C<sub>1</sub>:** Dibromo **1** (210 mg, 0.19 mmol, 1 equiv.), B<sub>2</sub>Pin<sub>2</sub> (117 mg, 0.46 mmol, 2.4 equiv.) and KOAc (112 mg, 1.14 mmol, 6 equiv.) were loaded into a 25 mL flame-dried Schlenk tube and cycled between vacuum and argon 3 times. Dry Dioxane (6 mL) was added and the mixture was degassed with argon for 15 minutes. PdCl<sub>2</sub>(dppf) (18 mg, 0.02 mmol, 0.1 equiv.) was added and the mixture was heated to 90°C. The reaction was tracked via LC-MS and after full consumption (3 hours) of the starting material the reaction was cooled down to room temperature, filtered over a silica pad, flushed down with EtOAc and

concentrated under reduced pressure. The concentrate was dissolved in 100 mL THF, followed by the addition of PdCl<sub>2</sub>(PPh<sub>3</sub>)<sub>2</sub> (67 mg, 0.095 mmol, 0.5 equiv.) and boric acid (59 mg, 0.95 mmol, 5 equiv.). The mixture was stirred vigorously for 15 minutes before KF (114 mg, 1.9 mmol, 10 equiv.) dissolved in 10 mL H<sub>2</sub>O was added in one portion. The mixture was stirred for 16 hours at room temperature open to the atmosphere, before it was filtered over silica and flushed down with THF. Organic volatiles

were removed under reduced pressure and the remaining aqueous phase was extracted with EtOAc 3 times. The organic phases were combined, dried with sodium sulphate and concentrated under reduced pressure. The crude was purified by SiO<sub>2</sub> column chromatography using Cyclohexane and EtOAc as eluent, collecting the 2<sup>nd</sup> band. The obtained yellowish solid was dispersed in MeOH and the white precipitate was collected by filtration and dried, yielding the desired compound **C<sub>1</sub>** as an off-white solid (115 mg, 64 % over two steps).

**<sup>1</sup>H-NMR:** (500 MHz, CD<sub>2</sub>Cl<sub>2</sub>): δ 8.51 (d, *J* = 2.0 Hz, 1H), 8.47 (d, *J* = 2.0 Hz, 1H), 7.87 (dd, *J* = 8.0, 2.0 Hz, 1H), 7.83 (dd, *J* = 8.0, 2.1 Hz, 1H), 7.72 – 7.67 (m, 2H), 7.66 – 7.62 (m, 2H), 7.61 – 7.56 (m, 2H), 7.46 (d, *J* = 8.3 Hz, 2H), 7.41 (d, *J* = 8.0 Hz, 1H), 7.39 – 7.28 (m, 11H), 7.02 – 6.97 (m, 4H), 5.89 – 5.84 (m, 2H), 5.03 (s, 1H), 4.94 (d, *J* = 9.1 Hz, 1H), 4.91 (d, *J* = 9.0 Hz, 1H), 4.74 – 4.70 (m, 2H), 4.36 (d, *J* = 6.1 Hz, 2H), 3.85 (s, 3H), 3.84 (s, 3H), 1.87 (s, 1H), 1.46 (s, 9H).

**<sup>13</sup>C-NMR {1H}:** (126 MHz, CD<sub>2</sub>Cl<sub>2</sub>): δ 166.29, 166.17, 160.03, 159.61, 156.27, 144.77, 143.92, 141.29, 140.09, 140.06, 139.67, 139.31, 139.24, 139.20, 139.08, 139.04, 134.97, 134.87, 132.55, 132.36, 132.19, 132.04, 130.73, 130.64, 130.56, 130.27, 129.63, 129.61, 129.19, 128.48, 127.82, 127.71, 127.49, 125.92, 124.87, 124.82, 114.69, 114.24, 79.65, 65.10, 64.11, 64.03, 55.71, 44.59, 28.54.

**HR-ESI-MS (+):** *m/z* calculated for C<sub>61</sub>H<sub>53</sub>NO<sub>9</sub>Na [M+Na]<sup>+</sup>; 966.3603 found 966.3603

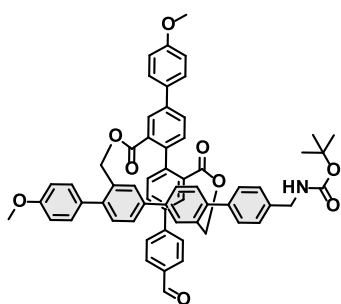

**Compound C<sub>2</sub>:** Cross **C<sub>1</sub>** (60 mg, 0.064 mmol, 1 equiv.) was dissolved in dry dichloromethane (6 mL) and cooled down to 0°C. DMP (33 mg, 1.2 equiv.) was added portion wise while cooled and after full addition the mixture was allowed to warm to room-temperature. The mixture was tracked by TLC and upon full conversion after 1 hour the mixture was quenched with sat. NaHCO<sub>3</sub> and sat. NaHSO<sub>3</sub>. The aqueous phase was extracted with CH<sub>2</sub>Cl<sub>2</sub> 3 times and concentrated. The crude was plugged over a pad of silica (CH<sub>2</sub>Cl<sub>2</sub>:EtOAc 9:1) yielding the product as a white solid (52 mg, 86 %).

**<sup>1</sup>H-NMR:** (500 MHz, CD<sub>2</sub>Cl<sub>2</sub>) δ 10.05 (s, 1H), 8.57 (d, *J* = 2.0 Hz, 1H), 8.48 (d, *J* = 2.1 Hz, 1H), 7.97 (d, *J* = 8.1 Hz, 2H), 7.92 (dd, *J* = 8.0, 2.0 Hz, 1H), 7.88 (d, *J* = 8.2 Hz, 2H), 7.84 (dd, *J* = 8.0, 2.0 Hz, 1H), 7.66 – 7.62 (m, 2H), 7.60 (ddd, *J* = 8.1, 6.6, 1.9 Hz, 2H), 7.46 (d, *J* = 8.0 Hz, 1H), 7.40 – 7.27 (m, 12H), 7.03 – 6.97 (m, 4H), 5.87 (dd, *J* = 14.1, 7.9 Hz, 2H), 5.03 (s, 1H), 4.94 (dd, *J* = 14.1, 3.4 Hz, 2H), 4.36 (d, *J* = 6.2 Hz, 2H), 3.85 (s, 3H), 3.84 (s, 2H), 1.46 (s, 9H).

**<sup>13</sup>C-NMR {1H}:** (126 MHz, CD<sub>2</sub>Cl<sub>2</sub>) δ 192.11, 166.30, 165.94, 160.06, 159.62, 145.99, 143.60, 140.25, 139.65, 139.24, 139.21, 139.12, 138.99, 138.98, 136.05, 134.94, 134.79, 132.48, 132.43, 132.33, 131.88, 130.90, 130.75, 130.68, 130.60, 130.56, 130.33, 130.05, 129.63, 129.23, 128.48, 128.08, 128.05, 127.72, 127.64, 125.90, 124.91, 124.86, 114.71, 114.25, 79.78, 64.15, 64.12, 55.72, 44.58, 28.54.

**HR-ESI-MS (+):** *m/z* calculated for C<sub>61</sub>H<sub>51</sub>NO<sub>9</sub>Na [M+Na]<sup>+</sup>; 964.3456 found 964.3455.

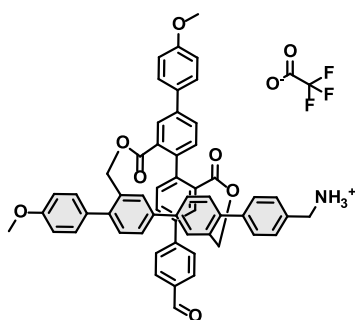

**Compound C<sub>M</sub>:** Cross **C<sub>2</sub>** (24 mg, 1 equiv.) was dissolved in 1 mL CH<sub>2</sub>Cl<sub>2</sub> and 0.1 mL TFA was added, the mixture is stirred for 1 h. 5 mL toluene was added and the mixture was concentrated under reduced pressure yielding the product as the TFA salt (25 mg, quant.) as an off-white solid.

#### Reaction in NMR-Tube:

3 mg of protected amine **C<sub>2</sub>** was dissolved in 0.75 mL CD<sub>2</sub>Cl<sub>2</sub> followed by the addition of 70 μL TFA-d. The tube was shaken until homogenous and <sup>1</sup>H-NMR spectra were recorded after several time intervals. After 1 hour the spectra indicated full conversion towards the product.

**<sup>1</sup>H NMR** (600 MHz, CD<sub>2</sub>Cl<sub>2</sub>:TFA-d 10:1) δ 9.98 (s, 1H), 8.60 (d, *J* = 2.0 Hz, 1H), 8.53 (d, *J* = 2.0 Hz, 1H), 8.11 – 8.06 (m, 2H), 7.97 (dd, *J* = 8.0, 2.0 Hz, 1H), 7.92 – 7.86 (m, 3H), 7.67 – 7.58 (m, 4H), 7.54 – 7.39 (m, 6H), 7.34 – 7.26 (m, 6H), 7.09 – 7.03 (m, 4H), 5.84 (d, *J* = 14.4 Hz, 2H), 5.08 (d, *J* = 14.4 Hz, 1H), 5.00 (d, *J* = 14.4 Hz, 1H), 4.40 (s, 2H), 3.94 (s, 3H), 3.93 (s, 3H).

**<sup>1</sup>H-NMR:** (500 MHz, DMSO-d<sub>6</sub>): δ 10.07 (s, 1H), 8.54 (d, *J* = 2.1 Hz, 1H), 8.42 (d, *J* = 2.1 Hz, 1H), 8.22 (s, 3H), 8.11 (dd, *J* = 8.1, 2.1 Hz, 1H), 8.06 – 7.99 (m, 4H), 7.96 (dd, *J* = 8.1, 2.1 Hz, 1H), 7.75 – 7.67 (m, 4H), 7.60 – 7.56 (m, 2H), 7.55 – 7.48 (m, 3H), 7.40 (d, *J* = 8.0 Hz, 1H), 7.38 – 7.32 (m, 4H), 7.25 – 7.18 (m, 2H), 7.09 – 7.03 (m, 4H), 5.77 (dd, *J* = 14.6, 8.5 Hz, 2H), 5.00 (dd, *J* = 14.4, 5.4 Hz, 2H), 4.16 – 4.09 (m, 2H), 3.81 (d, *J* = 5.1 Hz, 6H).

**<sup>13</sup>C-NMR {1H}:** (126 MHz, DMSO-d<sub>6</sub>): δ 192.76, 165.11, 164.85, 159.31, 158.84, 144.91, 144.34, 142.61, 139.15, 139.09, 137.83, 135.44, 134.20, 134.07, 131.01, 130.54, 130.28, 130.06, 129.16, 129.09, 127.87, 127.46, 127.03, 126.71, 124.74, 124.04, 114.56, 114.03, 63.92, 55.21, 55.19, 42.01.

Signals: 192.76, 165.11, 164.85, 159.31, 144.91, 144.34, 142.61, 139.15, 139.09, 137.83, 134.20, 134.07, 131.01, 130.54, 127.03, 126.71, 124.74, 124.04, 63.92 are extracted from 2D-NMR.

**HR-ESI-MS (+):** *m/z* calculated for C<sub>56</sub>H<sub>44</sub>NO<sub>7</sub> [M+H]<sup>+</sup>; 842.3112, found 842.3120.

## Physico-Chemical Analysis

(Chiro)-Optical analysis

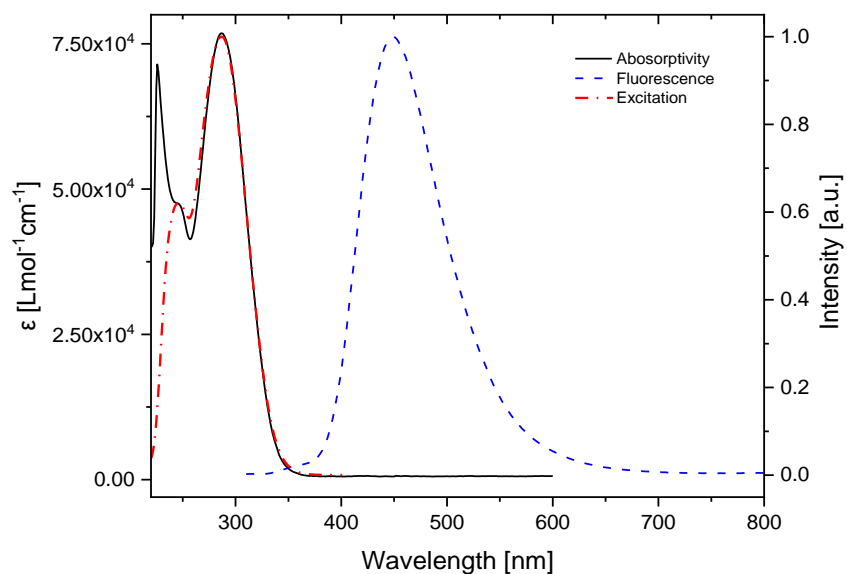

**Figure S1:** Absorptivity ( $c \sim 5 \cdot 10^{-6}$ ), normalized fluorescence ( $c \sim 1 \cdot 10^{-6}$ , 287 nm) and normalized excitation (445 nm) plot in  $CH_2Cl_2$  at 20 °C of  $C_2$ .

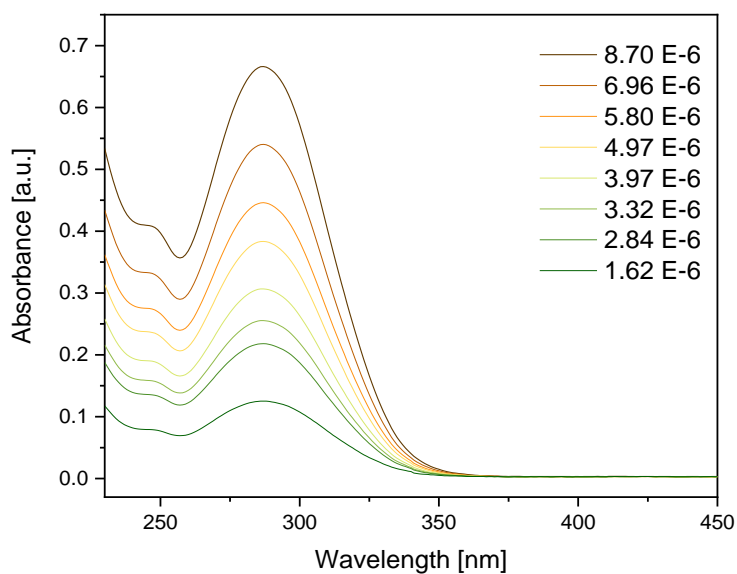

**Figure S2:** Dilution series of the absorption of  $C_2$  in  $CH_2Cl_2$  at 20 °C.

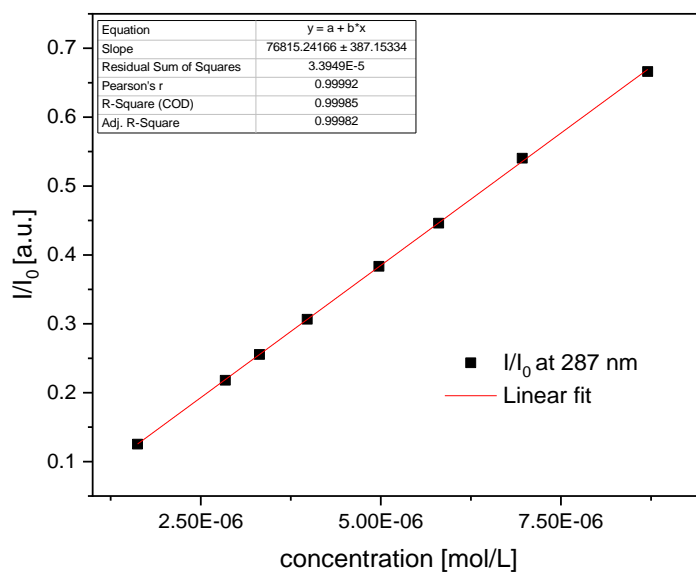

**Figure S3:** Linear regression of the absorption value of **C<sub>2</sub>** at 287 nm in CH<sub>2</sub>Cl<sub>2</sub> at 20 °C versus concentration.

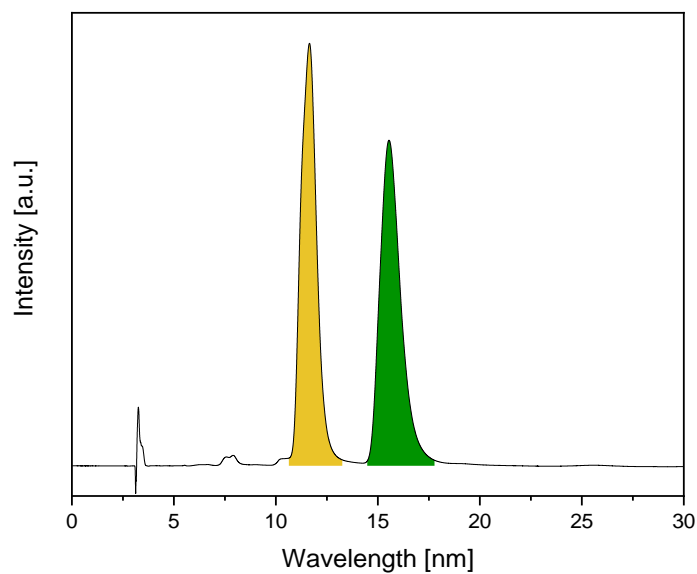

**Figure S4:** HPLC-chromatogram (285 nm) of (*rac*)-**C<sub>2</sub>**, IG-Chiralpak; Heptane/CH<sub>2</sub>Cl<sub>2</sub> 40/60 v/v; r.t..

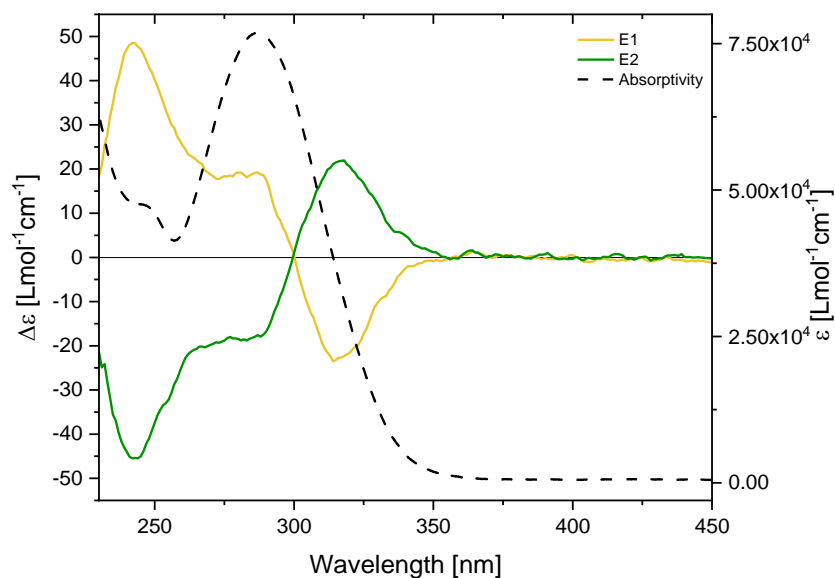

**Figure S5:** Molar absorptivity and CD-spectra of first eluting (E1-yellow) and second eluting enantiomer (E2-green) of  $C_2$  in  $CH_2Cl_2$  at 20 °C.

#### TD-DFT calculation

To assign the configuration of the eluted enantiomers 60 vertical singlet and 60 vertical triplet transitions were computed at the TD-B3LYP/3-21G level of theory following the protocol described by *Pescitelli et al.*<sup>[3]</sup> and their rotary strength was fitted using the SpecDis software.<sup>[4]</sup> The geometry calculations of (*P*)- $C_2$  are describe further below in this SI and the coordinates are reported further below aswell. As experimental and simulated data fitted well no additional dispersion or solvent effects were taken into account in the computation of the transitions.

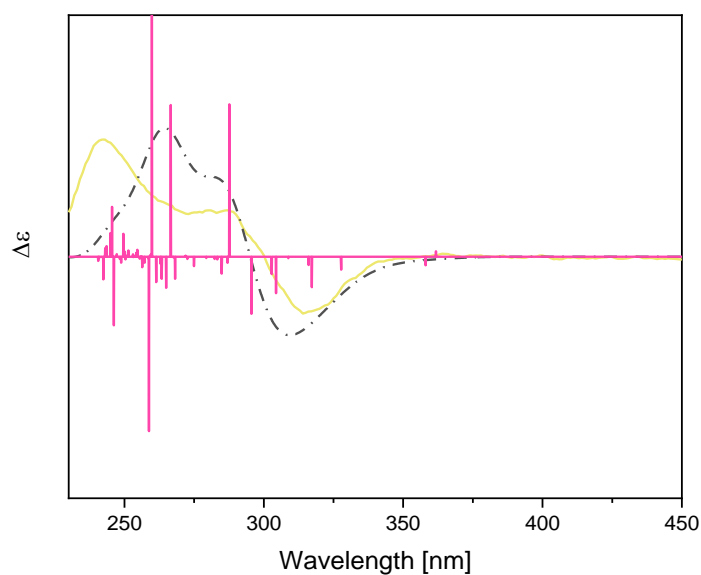

**Figure S6.** Experimental (yellow line) of E1 and computed (black dash dot line) spectra of (*P*)- $C_2$ . The computed transitions are visualized as pink sticks. The computed spectrum was fitted with a  $\sigma = 0.2$  eV and shifted by 0.1 eV to the red.



## Oligomerization

In-solution synthesis

Maldi spectrum reaction control

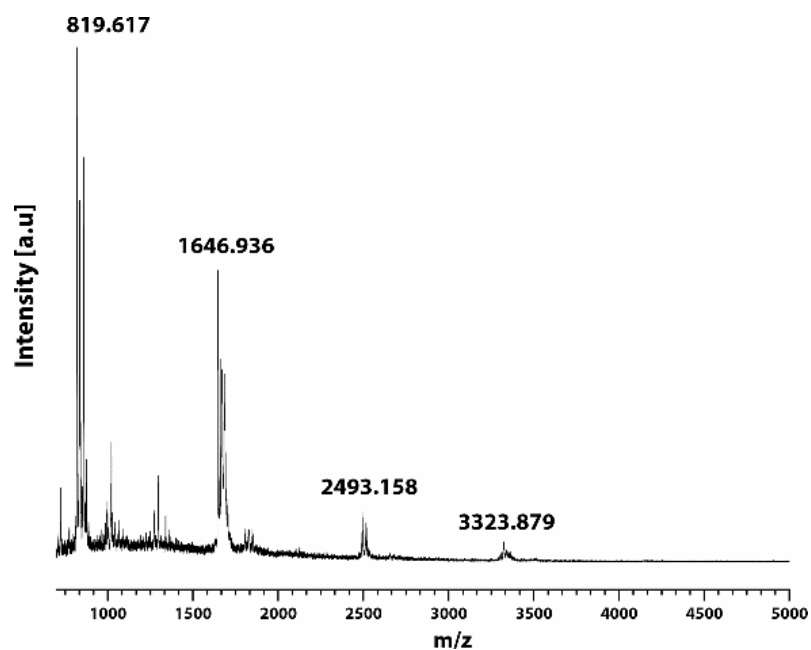

**Figure S7.** MALDI spectrum reaction control of  $O_{M-1}$  after 30 minutes indicating the presence of  $C_M$  (820-850 m/z), dimeric (1640-1670 m/z), trimeric (2480-2520 m/z) and tetrameric (3300-3350 m/z) species.

DOSY spectra  $C_2$  and  $O_{M-1}$

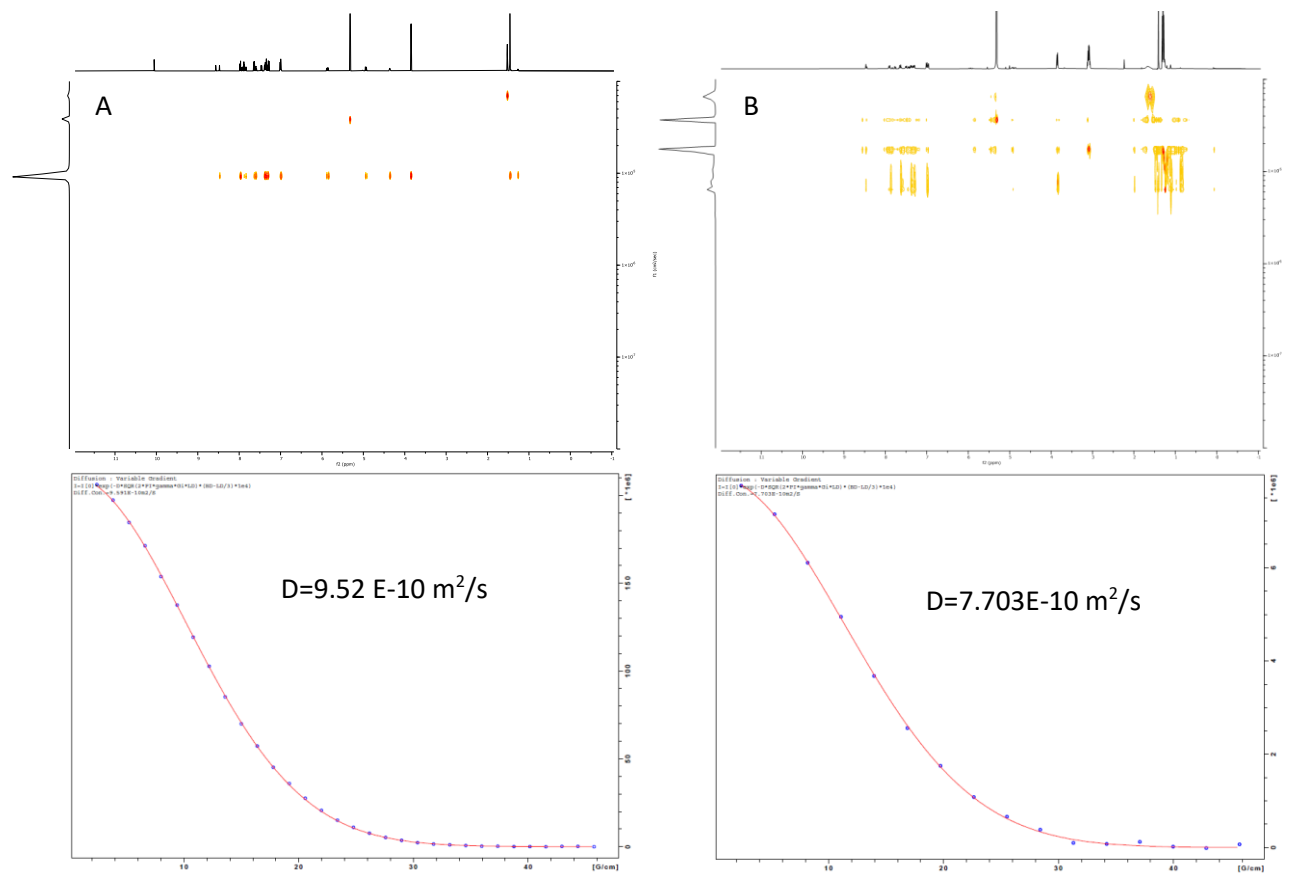

**Figure S8.** DOSY spectra (top) and fit (bottom) of A)  $C_2$  and B)  $O_{M-1}$  in  $CD_2Cl_2$ , 600 MHz at 25 °C.

## $^1\text{H-NMR}$ of $\text{O}_{\text{M-I}}$ and $\text{O}_{\text{M-A}}$

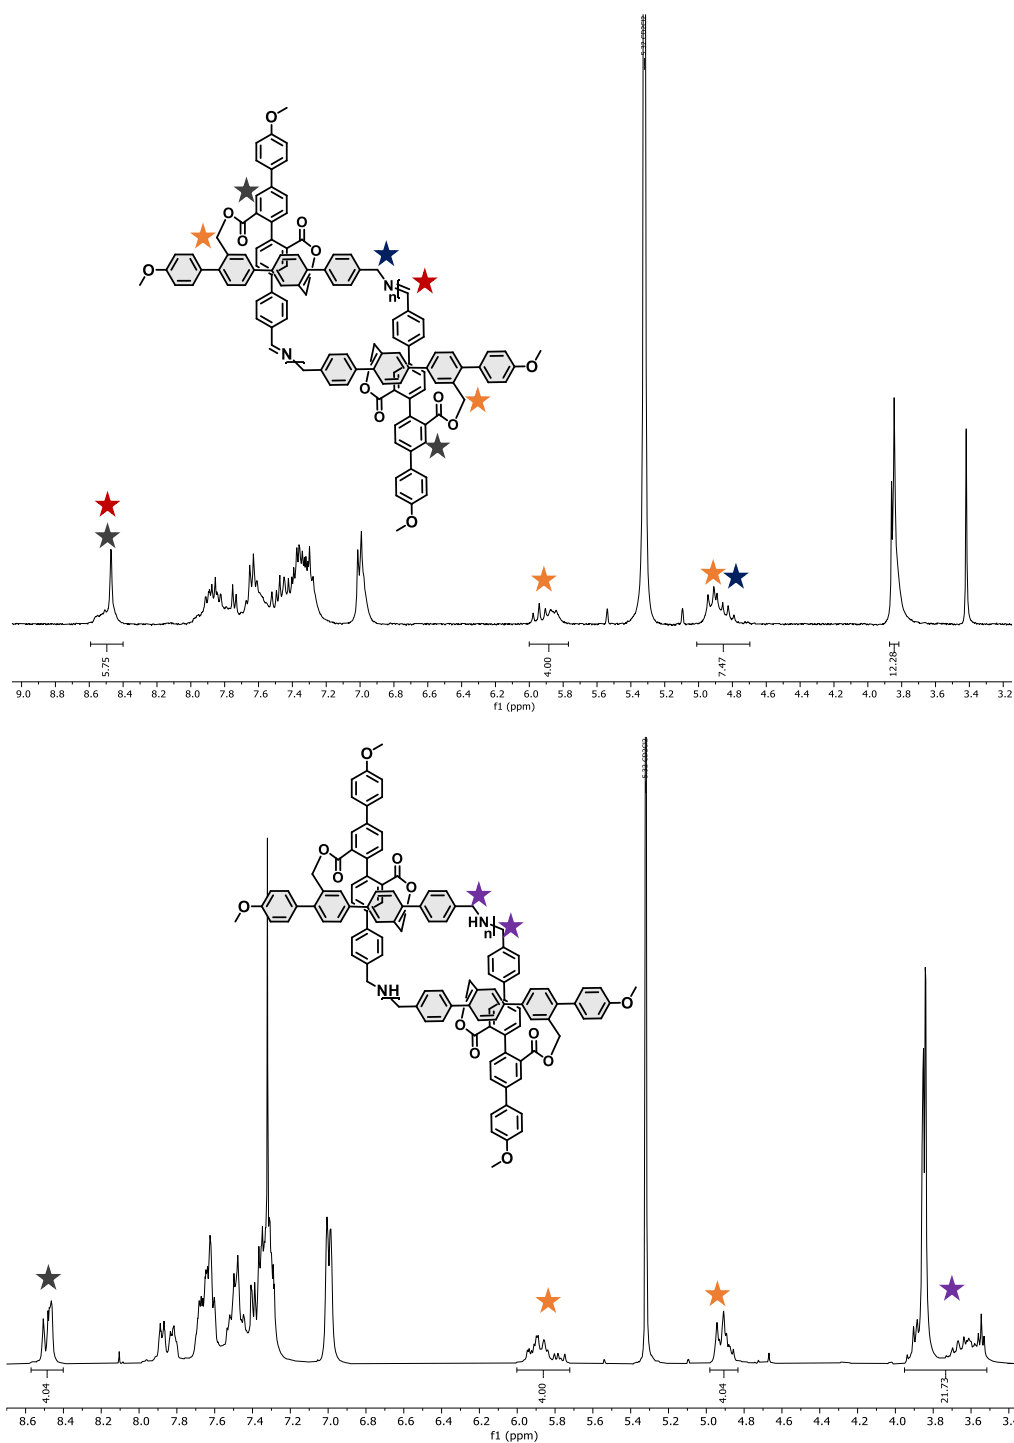

**Figure S9.**  $^1\text{H-NMR}$  of  $\text{O}_{\text{M-I}}$  and  $\text{O}_{\text{M-A}}$  in  $\text{CD}_2\text{Cl}_2$ , at  $20\text{ }^\circ\text{C}$ . The indicated protons of imine (red), benzylic imine (blue) and benzylic amine (purple) match the expected ratio in comparison to the benzylic ester protons of the center motive (orange), considering the overlap of the methoxy signal at 3.8 ppm and phenyl proton (black) at 8.5 ppm.

## Preparation and $^1\text{H-NMR}$ analysis of imine **I** and amine **A** model compound

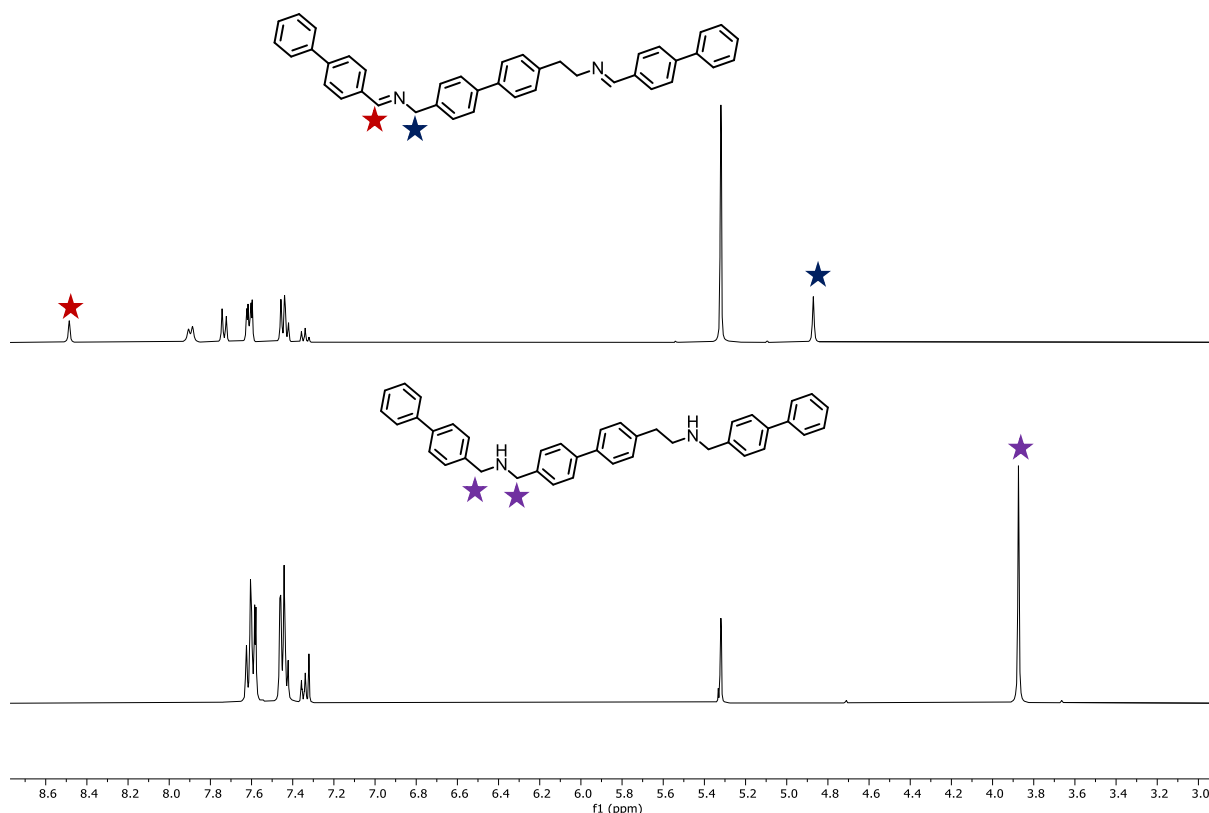

**Figure S10.**  $^1\text{H-NMR}$  of imine **I** and amine **A** model compound in  $\text{CD}_2\text{Cl}_2$  (400 MHz, 20 °C). Corresponding imine (red), benzylic  $\text{CH}_2$  imine (blue) and benzylic  $\text{CH}_2$  amine (purple) are indicated.

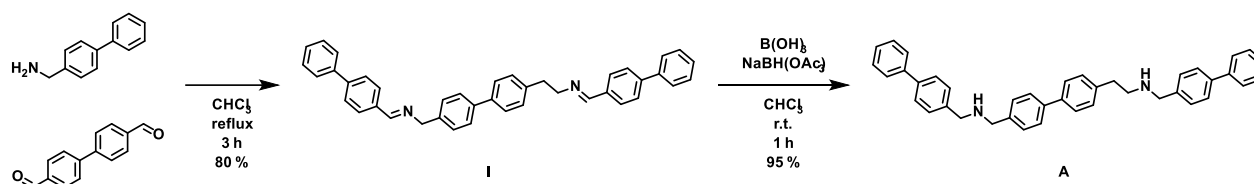

**Scheme S1.** Preparation of model compounds **I** and **A**.

**Synthetic procedure I:** Phenyl benzyl amine (90 mg, 0.49 mmol, 2.1 equiv.) and 4,4'-biphenylcarboxaldehyde (50 mg, 0.24 mmol, 1 equiv.) were dissolved in dry  $\text{CHCl}_3$  (3 mL) under inert atmosphere and refluxed for 3 hours. The resulting mixture was concentrated under reduced pressure and the obtained solid was washed with a bit of  $\text{Et}_2\text{O}$  to obtain the product as an off-yellow solid (100 mg, 80%).  $^1\text{H-NMR}$ : (400 MHz,  $\text{CD}_2\text{Cl}_2$ )  $\delta$  8.49 (s, 2H), 7.90 (d,  $J = 7.9$  Hz, 4H), 7.73 (d,  $J = 8.2$  Hz, 4H), 7.65 – 7.57 (m, 8H), 7.44 (dd,  $J = 8.1, 6.6$  Hz, 8H), 7.38 – 7.29 (m, 2H), 4.87 (s, 4H).  $^{13}\text{C-NMR}$  {1H}: (101 MHz,  $\text{CD}_2\text{Cl}_2$ )  $\delta$  161.66, 142.86, 141.27, 140.20, 139.20, 136.18, 129.15, 129.11, 128.86, 127.66, 127.61, 127.51, 127.36, 65.18. **HR-ESI-MS**:  $m/z$  calculated for  $\text{C}_{40}\text{H}_{33}\text{N}_2$   $[\text{M}+\text{H}]^+$ ; 541.2637, found 541.2638.

**Synthetic procedure A:** Imine **I** (10 mg, 1 equiv.),  $\text{NaBH}(\text{OAc})_3$  (87 mg, 20 equiv.) and ground  $\text{B}(\text{OH})_3$  (23 mg, 20 equiv.) were added to a round-bottom flask. The mixture was suspended in 5 mL  $\text{CHCl}_3$  and stirred at r.t. for 1 h, before it was quenched with sat.  $\text{Na}_2\text{CO}_3$  and extracted with  $\text{CH}_2\text{Cl}_2$  3 times. The organics were collected, dried with  $\text{Na}_2\text{SO}_4$ , filtered and concentrated to yield **A** (10 mg, 97 %).  $^1\text{H-NMR}$ :  $^1\text{H}$  NMR (400 MHz,  $\text{CD}_2\text{Cl}_2$ )  $\delta$  7.64 – 7.57 (m, 12H), 7.49 – 7.41 (m, 12H), 7.38 – 7.30 (m, 2H), 3.87 (s, 8H).  $^{13}\text{C-NMR}$  {1H}: (101 MHz,  $\text{CD}_2\text{Cl}_2$ )  $\delta$  141.32, 140.32, 140.19, 140.04, 139.86, 129.15, 128.97, 127.56, 127.35, 127.32, 127.23, 53.22, 53.20. **HR-ESI-MS**:  $m/z$  calculated for  $\text{C}_{40}\text{H}_{37}\text{N}_2$   $[\text{M}+\text{H}]^+$ ; 545.2951, found 541.2958.

## SEC chromatogram of $O_{M-A}$

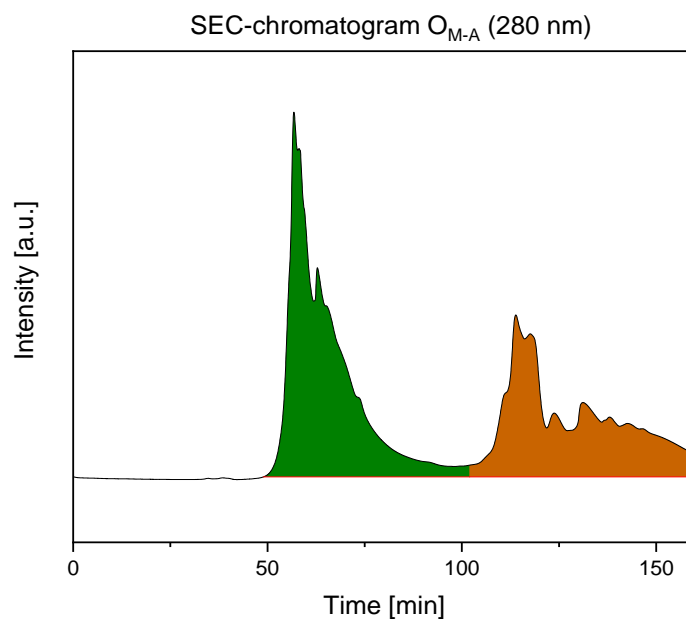

**Figure S11.** Size exclusion chromatography (SEC) chromatogram of  $O_{M-A}$ ; showing cycle 1 (green) and 2 (orange) indicating the extreme smearing.

## On-surface analysis with nc-AFM

### Surface before annealing:

Large scale topography ncAFM image (SI Fig XXA) reveal the presence of short chains or clusters of  $C_M$  molecules on the Au(111) surface (see arrow). Smaller bright protrusion (see dotted area) are also visible indicating the present of solvent molecules and are preferentially aligned at herringbone kinks [hin21]. The step edges are covered either with  $C_M$  molecules (thick protrusion) either with residual solvent molecules (thin protrusion). It is possible to zoom on the individuals  $C_M$  molecules or chains of  $C_M$  molecules, as visible in the topography and corresponding dissipation image (SI Fig XXBC). There, it is difficult to identify the different part of the molecules in the submolecular resolution images.

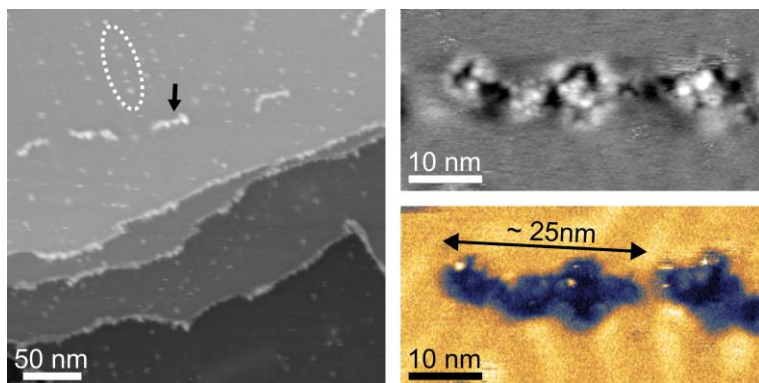

**Figure S12.** ncAFM topography on  $C_M$  on Au(111) surface as deposited. A) Large scale topography of B) topography and corresponding dissipation C) on small chains of  $C_M$ . Due to specific imaging conditions, contrast of the chain is lower compared to the Au(111) surface. Parameters:  $f_1 = 322$  kHz,  $A_1 = 5$  nm. A)  $\Delta f_1 = -25$  Hz. B,C)  $\Delta f_2 = -100$  Hz

### Surface after annealing

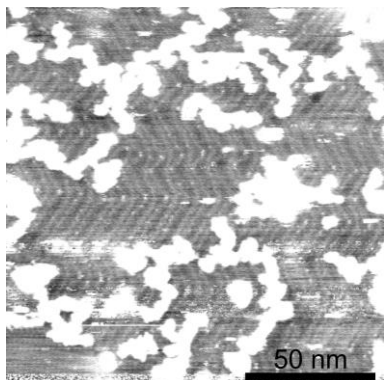

**Figure S13.** Same image as Figure 5a in the main manuscript with a different contrast to show the herringbone structure of the Au(111) surface. Protrusion corresponding to remaining adsorbed species are visible only at kinks of the herringbone, sign of a clean surface.

### Cluster: molecular structure identification:

We created a mask from the highly dissipative region (bright color) of the second eigenmode dissipation of Figure 5 in the main manuscript. Superposing such mask on top of the pattern help us for the identification of the structures in the cluster.

The submolecular resolution image obtain in the second eigenmode frequency shift image on the island (SIFig XXA) do not present row as in the topography (Fig. 5C main manuscript). Instead, cyclic structure are visible.

It is possible to exactly superimpose the mask pattern extracted from the dissipation of the second eigenmode image on the corresponding frequency shift image. When doing the same, the mask pattern also adapt well to the row structure of the topography with all cyclic pattern on similar position of the topography.

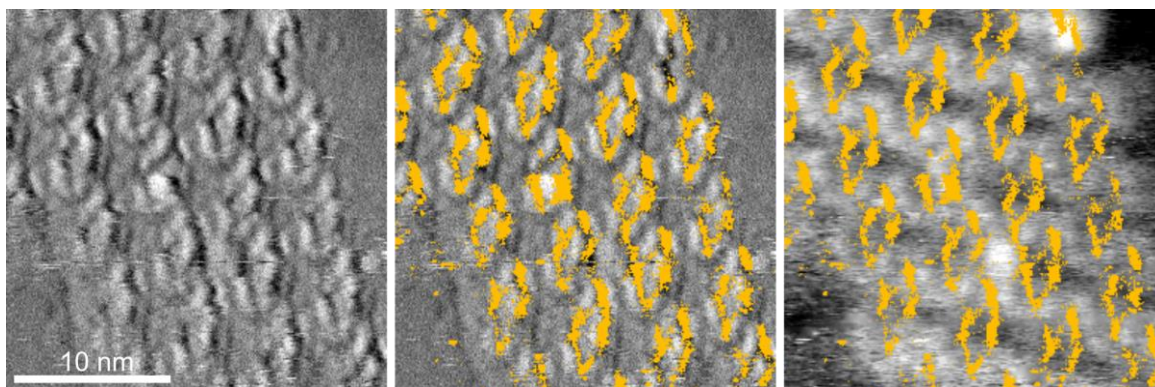

**Figure S14.**  $C_M$  cluster on Au(111). A) second eigenmode frequency shift image corresponding to fig 5C-D of the main manuscript. B) Mask pattern extracted from the second eigenmode dissipation superimposed on the second eigenmode frequency shift and on the C) topography images. Mask is yellow.

Parameters: A,B)  $f_2 = 2.3$  MHz,  $A_2 = 200$ pm. C)  $f_1 = 322$  kHz,  $A_1 = 8$ nm,  $\Delta f_1 = -60$  Hz.

## Geometry optimizations

The geometry of (*P*)-**C**<sub>2</sub> was modeled from the crystal structure of (*rac*)-**C**<sub>1</sub> and optimized by molecular mechanics to obtain an initial structure which was further refined by geometry optimization at B3LYP/3-21G level of theory and analyzed by computed frequencies.

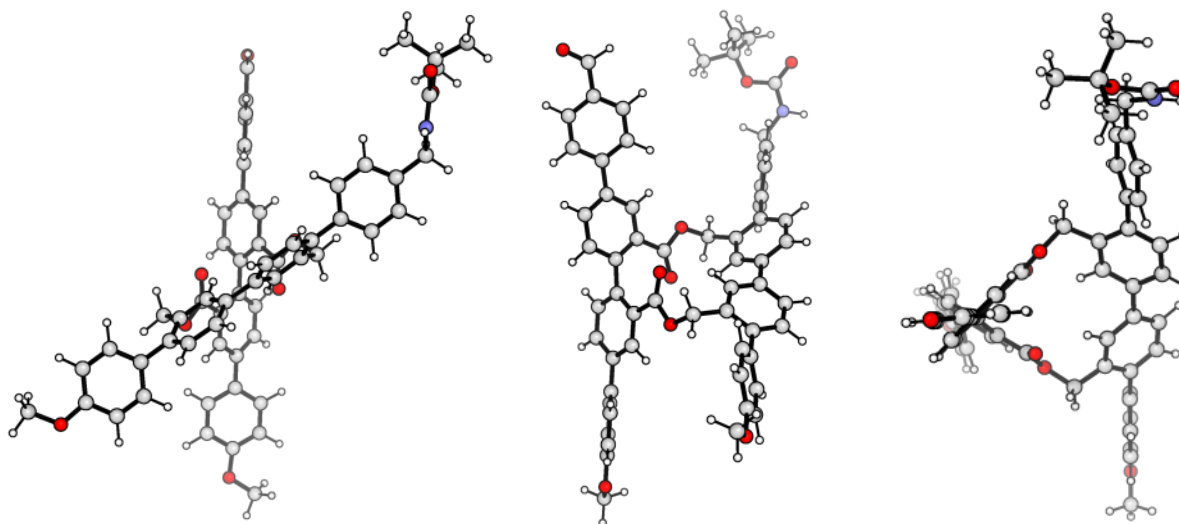

**Figure S15.** Geometry optimized structure of (*P*)-**C**<sub>2</sub>, displayed in different orientations from left to right: front, side and top view.

The macrocyclic dimerization product of the imine condensation can either lead to a homochiral or heterochiral product. Thus, (*M, M*)-**O**<sub>M-I,dimer</sub> and (*M, P*)-**O**<sub>M-I,dimer</sub> were modeled from the optimized geometry from (*P*)-**C**<sub>2</sub> and the initial guesses optimized by molecular mechanics. Both geometries were further optimized at B3LYP/6-31G\* level of theory and analyzed by computed frequencies. The model of (*M, M*)-**O**<sub>M-I,dimer</sub> has the terphenyl on the “carbonyl side” of the parent monomers on one plane and the “alcohol side” out of plane leading to a boat like structure. In contrast the model of (*M, P*)-**O**<sub>M-I,dimer</sub> has of each parent structure the opposed side (carbonyl and alcohol side) in one plane leading to a staggered structure. Computed thermal data suggest that the homochiral product is the more stable product see Table S1.

**Table S1.** Thermal energies and corrections from the frequency analysis of (*M, M*)-**O**<sub>M-I,dimer</sub> and (*M, P*)-**O**<sub>M-I,dimer</sub> at B3LYP/6-31G\* level of theory.

| Species                                        | SP E [Hartree] | ZPC [Hartree] | corr E [Hartree] | Thermal corrections [Hartree] | G [Hartree]  |
|------------------------------------------------|----------------|---------------|------------------|-------------------------------|--------------|
| ( <i>M, M</i> )- <b>O</b> <sub>M-I,dimer</sub> | -5327.917      | 1.659436      | -5326.257402     | 1.762756                      | -5326.154082 |
| ( <i>M, P</i> )- <b>O</b> <sub>M-I,dimer</sub> | -5327.911      | 1.658267      | -5326.25261      | 1.762043                      | -5326.148834 |

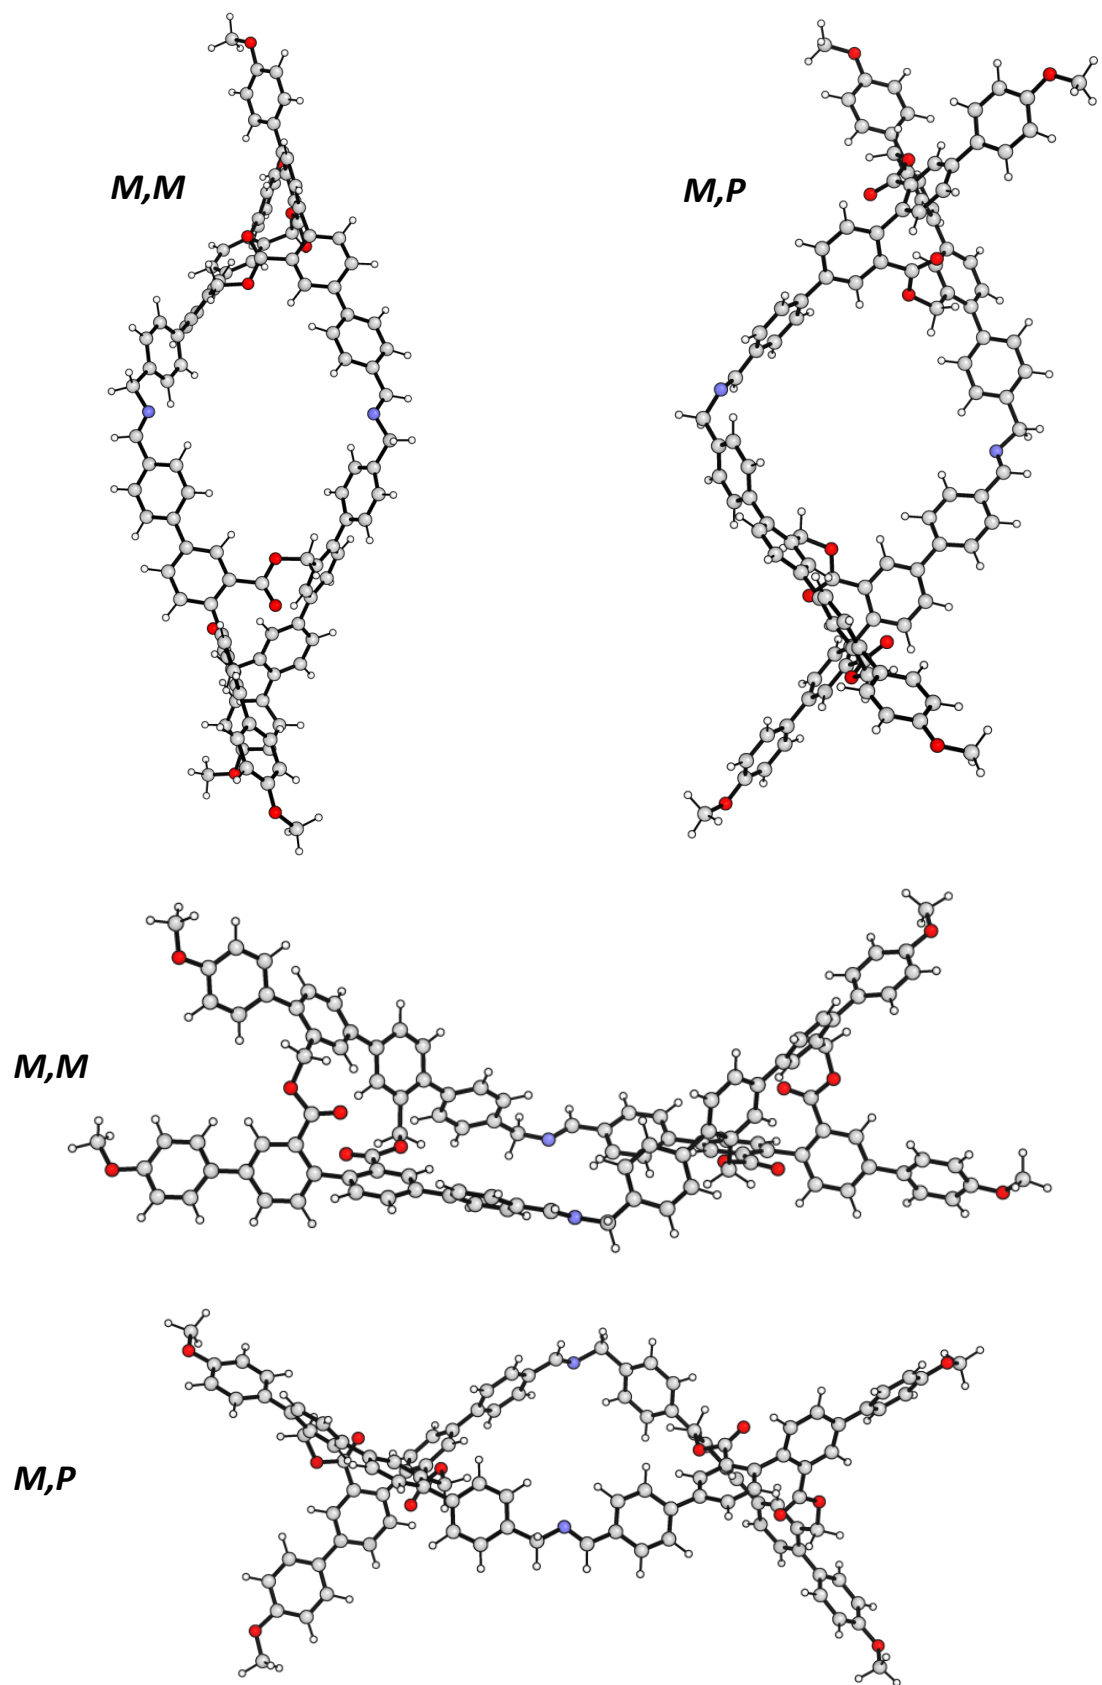

**Figure S16.** Geometry optimized structure of *(M,M)*- $\text{O}_{\text{M-I}}$ -dimer and *(M,P)*- $\text{O}_{\text{M-I}}$ -dimer, displayed in top view orientation (top) and from the side (bottom).

**Coordinates (energies in kcal)**

|                    |                          |          |          |   |           |          |          |
|--------------------|--------------------------|----------|----------|---|-----------|----------|----------|
| 122                |                          |          |          | H | 0.48284   | -5.15648 | 0.71842  |
| (P)-C <sub>2</sub> | Energy: -1926511.1666091 |          |          | C | 2.00959   | -4.03434 | -0.29884 |
| O                  | 10.05947                 | -1.17837 | -1.69126 | H | 2.76675   | -4.79874 | -0.16687 |
| O                  | 10.77937                 | -3.23880 | -0.87296 | C | 1.66765   | -0.50526 | -1.77185 |
| O                  | -9.70383                 | -3.99247 | 3.25073  | H | 2.70998   | -0.41227 | -2.06649 |
| O                  | 1.46719                  | 0.60157  | -0.78461 | H | 0.99600   | -0.31901 | -2.61350 |
| O                  | -0.71802                 | 0.80828  | -1.46291 | C | -1.64615  | -3.39173 | 0.53934  |
| O                  | -4.18791                 | 0.05457  | 1.05006  | C | -2.23808  | -2.27204 | 1.13377  |
| O                  | -2.09477                 | 0.77827  | 1.66005  | H | -1.66534  | -1.36201 | 1.25010  |
| O                  | 6.41060                  | 6.01826  | 5.23039  | C | -3.55954  | -2.28663 | 1.59099  |
| O                  | -9.55522                 | 2.71280  | -4.84145 | C | -4.30999  | -3.47713 | 1.49645  |
| N                  | 8.82638                  | -3.03345 | -2.08145 | C | -3.70323  | -4.61020 | 0.92386  |
| H                  | 8.69288                  | -4.03699 | -2.01143 | H | -4.27736  | -5.52731 | 0.85858  |
| C                  | 11.22181                 | -0.43118 | -1.09651 | C | -2.39701  | -4.57334 | 0.44330  |
| C                  | 11.19620                 | -0.57465 | 0.43284  | H | -1.96572  | -5.45145 | -0.02406 |
| H                  | 11.32887                 | -1.62360 | 0.70017  | C | -4.13988  | -0.99002 | 2.12110  |
| H                  | 10.23737                 | -0.21677 | 0.82243  | H | -5.17767  | -1.10671 | 2.42313  |
| H                  | 12.00126                 | 0.02527  | 0.86961  | H | -3.52739  | -0.59588 | 2.93582  |
| C                  | 12.53151                 | -0.95690 | -1.70350 | C | -5.71478  | -3.58375 | 1.98751  |
| H                  | 12.49855                 | -0.86214 | -2.79392 | C | -6.03392  | -3.38000 | 3.33579  |
| H                  | 12.65912                 | -2.00585 | -1.43402 | H | -5.24325  | -3.14314 | 4.03919  |
| H                  | 13.37289                 | -0.36899 | -1.32233 | C | -7.34691  | -3.50415 | 3.79615  |
| C                  | 10.93426                 | 1.00995  | -1.53371 | H | -7.55490  | -3.34588 | 4.84565  |
| H                  | 9.96904                  | 1.33464  | -1.13391 | C | -8.37093  | -3.84261 | 2.90695  |
| H                  | 10.90060                 | 1.06725  | -2.62573 | C | -8.06045  | -4.05584 | 1.55521  |
| H                  | 11.72021                 | 1.67486  | -1.16211 | H | -8.86874  | -4.31286 | 0.88339  |
| C                  | 9.96333                  | -2.54528 | -1.49244 | C | -6.75452  | -3.92943 | 1.10422  |
| C                  | 7.85746                  | -2.23904 | -2.84592 | H | -6.52809  | -4.08221 | 0.05551  |
| H                  | 7.90653                  | -2.49298 | -3.91342 | C | -10.08075 | -3.78310 | 4.64512  |
| H                  | 8.16712                  | -1.19886 | -2.73013 | H | -9.57918  | -4.49595 | 5.31093  |
| C                  | 6.42828                  | -2.42652 | -2.35315 | H | -11.15768 | -3.94982 | 4.67347  |
| C                  | 5.35968                  | -2.37896 | -3.25568 | H | -9.85646  | -2.76153 | 4.97550  |
| H                  | 5.55849                  | -2.25680 | -4.31576 | C | 0.21631   | 1.19022  | -0.75595 |
| C                  | 4.04377                  | -2.50371 | -2.81000 | C | -3.09488  | 0.89272  | 0.94697  |
| H                  | 3.22654                  | -2.49431 | -3.52262 | C | 6.04626   | 4.86662  | 4.96944  |
| C                  | 3.76484                  | -2.68027 | -1.44539 | C | 4.83934   | 4.53097  | 4.19121  |
| C                  | 4.84034                  | -2.74057 | -0.54492 | C | 4.48932   | 3.20160  | 3.93072  |
| H                  | 4.63663                  | -2.87281 | 0.51151  | H | 5.10949   | 2.39728  | 4.31454  |
| C                  | 6.15399                  | -2.61502 | -0.99374 | C | 3.34476   | 2.91220  | 3.19365  |
| H                  | 6.97739                  | -2.66408 | -0.29132 | H | 3.05848   | 1.88295  | 3.01386  |
| C                  | 2.36354                  | -2.84316 | -0.95821 | C | 2.53032   | 3.94895  | 2.70245  |
| C                  | 1.37587                  | -1.85311 | -1.14086 | C | 2.89313   | 5.28464  | 2.96999  |
| C                  | 0.07755                  | -2.08943 | -0.67848 | H | 2.28585   | 6.08922  | 2.57233  |
| H                  | -0.67772                 | -1.33733 | -0.86190 | C | 4.03391   | 5.57022  | 3.70594  |
| C                  | -0.26597                 | -3.26209 | 0.00350  | H | 4.33804   | 6.58890  | 3.91697  |
| C                  | 0.72049                  | -4.24368 | 0.18395  | C | 1.30867   | 3.63855  | 1.91650  |



|                        |                          |         |          |   |           |          |          |
|------------------------|--------------------------|---------|----------|---|-----------|----------|----------|
| C                      | 1.30825                  | 2.60807 | 0.96962  | C | -6.59567  | 0.67681  | 2.62166  |
| H                      | 2.20500                  | 2.03620 | 0.77983  | C | -7.61664  | -0.22632 | 2.31257  |
| C                      | 0.16476                  | 2.30206 | 0.22648  | C | -7.61794  | -1.55123 | 2.76404  |
| C                      | -1.02571                 | 3.03096 | 0.42265  | C | -8.71444  | -2.46339 | 2.35713  |
| C                      | -1.01693                 | 4.06969 | 1.36299  | C | -9.22105  | -3.46325 | 3.20243  |
| H                      | -1.92660                 | 4.63603 | 1.52122  | C | -10.26446 | -4.27843 | 2.77984  |
| C                      | 0.12408                  | 4.36877 | 2.10262  | C | -10.86464 | -4.12945 | 1.51515  |
| H                      | 0.09099                  | 5.15687 | 2.84588  | C | -10.37373 | -3.11259 | 0.66673  |
| C                      | -2.28150                 | 2.85903 | -0.38577 | C | -10.98800 | -2.78561 | -0.67990 |
| C                      | -3.28867                 | 1.91093 | -0.11476 | O | -11.39692 | -1.39181 | -0.73785 |
| C                      | -4.46587                 | 1.89851 | -0.86880 | C | -10.58349 | -0.51925 | -1.38341 |
| H                      | -5.19939                 | 1.13541 | -0.65224 | O | -9.51775  | -0.84191 | -1.87533 |
| C                      | -4.68570                 | 2.82178 | -1.89825 | C | -11.15010 | 0.86261  | -1.40780 |
| C                      | -3.68397                 | 3.77205 | -2.15444 | C | -12.47449 | 1.07244  | -1.00181 |
| H                      | -3.84087                 | 4.51833 | -2.92463 | C | -13.07092 | 2.33910  | -1.02553 |
| C                      | -2.50811                 | 3.78857 | -1.40823 | C | -14.47498 | 2.53453  | -0.58871 |
| H                      | -1.75040                 | 4.53573 | -1.61186 | C | -15.32027 | 3.45635  | -1.23569 |
| C                      | -5.94136                 | 2.79836 | -2.69114 | C | -16.63361 | 3.64325  | -0.82955 |
| C                      | -7.18332                 | 2.54681 | -2.07572 | C | -17.15108 | 2.90800  | 0.24711  |
| H                      | -7.22437                 | 2.38850 | -1.00441 | O | -18.45253 | 3.16306  | 0.56993  |
| C                      | -8.35584                 | 2.52623 | -2.81497 | C | -19.03024 | 2.44194  | 1.64629  |
| H                      | -9.31488                 | 2.34284 | -2.34890 | H | -19.03005 | 1.36068  | 1.45455  |
| C                      | -8.32954                 | 2.75524 | -4.19913 | H | -18.50797 | 2.63960  | 2.59182  |
| C                      | -7.10427                 | 3.00362 | -4.82433 | H | -20.06056 | 2.79404  | 1.72377  |
| H                      | -7.05152                 | 3.17056 | -5.89160 | C | -16.32990 | 1.98598  | 0.90596  |
| C                      | -5.92780                 | 3.02329 | -4.07416 | H | -16.69773 | 1.41095  | 1.74810  |
| H                      | -4.98207                 | 3.18799 | -4.57772 | H | -17.28516 | 4.34738  | -1.33771 |
| C                      | -9.58333                 | 2.94416 | -6.28222 | H | -14.94803 | 4.01767  | -2.08832 |
| H                      | -9.00164                 | 2.18863 | -6.82421 | C | -15.01053 | 1.81069  | 0.48506  |
| H                      | -9.20688                 | 3.94192 | -6.53880 | H | -14.37936 | 1.11076  | 1.02545  |
| H                      | -10.63479                | 2.86605 | -6.55926 | C | -12.28947 | 3.41151  | -1.48277 |
| H                      | 6.61414                  | 3.97877 | 5.30938  | C | -10.97372 | 3.21654  | -1.88957 |
|                        |                          |         |          | H | -10.38623 | 4.06650  | -2.22480 |
|                        |                          |         |          | H | -12.70678 | 4.41456  | -1.49691 |
| 208                    |                          |         |          | H | -13.05514 | 0.21503  | -0.68444 |
| (M, M)-O <sub>21</sub> | Energy: -3344359.5777743 |         |          | H | -11.90400 | -3.34931 | -0.85132 |
| H                      | -5.66697                 | 1.82458 | -1.52506 | H | -10.28499 | -2.96544 | -1.49722 |
| C                      | -3.92467                 | 2.29392 | -3.61592 | C | -11.97091 | -5.05161 | 1.13861  |
| C                      | -5.03052                 | 1.61725 | -4.16840 | C | -13.07443 | -5.23339 | 1.99442  |
| C                      | -6.37770                 | 1.71215 | -3.55428 | C | -14.09841 | -6.11517 | 1.67878  |
| C                      | -7.54027                 | 1.69256 | -4.34126 | C | -14.05096 | -6.85550 | 0.48808  |
| H                      | -7.45927                 | 1.64677 | -5.42353 | O | -15.10507 | -7.69381 | 0.26768  |
| C                      | -8.79946                 | 1.75730 | -3.75683 | C | -15.11120 | -8.46576 | -0.92257 |
| H                      | -9.68377                 | 1.73488 | -4.38697 | H | -15.11156 | -7.82890 | -1.81714 |
| C                      | -8.96582                 | 1.84493 | -2.36887 | H | -14.25154 | -9.14762 | -0.96654 |
| C                      | -7.80240                 | 1.89893 | -1.56791 | H | -16.03288 | -9.04987 | -0.89579 |
| C                      | -7.90531                 | 2.03355 | -0.08291 | C | -12.96094 | -6.69841 | -0.37499 |
| O                      | -6.69814                 | 1.92163 | 0.52345  | H | -12.88922 | -7.26652 | -1.29546 |
| C                      | -6.65305                 | 2.04492 | 1.97211  |   |           |          |          |

|   |           |          |          |   |          |          |          |
|---|-----------|----------|----------|---|----------|----------|----------|
| H | -14.95231 | -6.24535 | 2.33645  | C | 2.36003  | 3.16653  | 4.67082  |
| H | -13.13266 | -4.65744 | 2.91403  | C | 1.03656  | 3.27899  | 5.30093  |
| C | -11.93887 | -5.80588 | -0.04179 | C | 3.45026  | 2.70809  | 5.42327  |
| H | -11.08473 | -5.71840 | -0.70842 | H | 3.30361  | 2.43067  | 6.46505  |
| H | -10.63125 | -5.06031 | 3.43947  | C | 4.71226  | 2.58672  | 4.84993  |
| H | -8.80838  | -3.59337 | 4.19926  | H | 5.53268  | 2.19464  | 5.44368  |
| C | -9.29955  | -2.32606 | 1.09284  | C | 7.44232  | 3.02563  | 3.64278  |
| H | -8.90086  | -1.58815 | 0.40622  | H | 7.36755  | 3.34215  | 4.67924  |
| C | -6.55379  | -1.95992 | 3.58358  | C | 8.69915  | 2.87566  | 3.06747  |
| C | -5.54921  | -1.06352 | 3.93039  | H | 9.58647  | 3.05214  | 3.66852  |
| H | -4.74347  | -1.38976 | 4.58247  | C | 8.85914  | 2.49629  | 1.72869  |
| H | -6.50399  | -2.98541 | 3.93967  | C | 7.69147  | 2.29673  | 0.95725  |
| H | -8.44563  | 0.12432  | 1.70876  | C | 7.78395  | 1.92597  | -0.48752 |
| C | -5.54375  | 0.26571  | 3.46836  | O | 6.57615  | 1.58526  | -1.00214 |
| C | -4.44974  | 1.17286  | 3.91438  | C | 6.50545  | 1.25710  | -2.41622 |
| C | -4.72670  | 2.38998  | 4.55903  | C | 6.48367  | -0.24426 | -2.62487 |
| H | -5.75987  | 2.68410  | 4.72591  | C | 7.51141  | -0.99136 | -2.04455 |
| C | -3.69695  | 3.21230  | 5.01077  | C | 7.56047  | -2.38907 | -2.10642 |
| H | -3.94114  | 4.14856  | 5.50878  | C | 8.68468  | -3.09312 | -1.44401 |
| C | -2.35630  | 2.84590  | 4.84507  | C | 9.32339  | -4.21162 | -2.00043 |
| C | -1.25413  | 3.72760  | 5.40999  | C | 10.44725 | -4.75609 | -1.38699 |
| N | -0.01176  | 3.63119  | 4.66482  | C | 10.99667 | -4.20958 | -0.21146 |
| H | -1.10979  | 3.48767  | 6.48102  | C | 10.32604 | -3.11731 | 0.38234  |
| H | -1.58827  | 4.77326  | 5.36588  | C | 10.76419 | -2.46048 | 1.67325  |
| C | -2.07430  | 1.63655  | 4.20121  | O | 11.29056 | -1.12545 | 1.41369  |
| H | -1.04061  | 1.34522  | 4.04215  | C | 10.43622 | -0.08314 | 1.58275  |
| C | -3.10336  | 0.81347  | 3.74559  | O | 9.30351  | -0.21615 | 2.00868  |
| H | -2.86224  | -0.11544 | 3.23546  | C | 11.03604 | 1.22195  | 1.17615  |
| H | -5.75369  | 2.62548  | 2.17210  | C | 12.37001 | 1.27067  | 0.75041  |
| H | -7.53461  | 2.60663  | 2.29055  | C | 12.98435 | 2.46465  | 0.35446  |
| O | -8.94251  | 2.22086  | 0.52548  | C | 14.39710 | 2.48795  | -0.09714 |
| C | -10.36983 | 1.95405  | -1.85307 | C | 15.24856 | 3.56325  | 0.22152  |
| C | -6.53833  | 1.82149  | -2.16795 | C | 16.57017 | 3.58953  | -0.19958 |
| C | -4.81947  | 0.84623  | -5.32388 | C | 17.08992 | 2.53208  | -0.96078 |
| C | -3.55890  | 0.76205  | -5.90671 | O | 18.39947 | 2.65070  | -1.32624 |
| C | -2.46320  | 1.43651  | -5.35037 | C | 18.97974 | 1.60639  | -2.09128 |
| C | -1.14379  | 1.33132  | -5.99022 | H | 18.95920 | 0.65048  | -1.55123 |
| H | -3.41804  | 0.15554  | -6.79896 | H | 18.47357 | 1.48431  | -3.05808 |
| H | -5.64475  | 0.28654  | -5.75400 | H | 20.01664 | 1.90137  | -2.26252 |
| H | -4.06488  | 2.91696  | -2.73736 | C | 16.26252 | 1.45260  | -1.29055 |
| C | -2.66471  | 2.20445  | -4.19113 | H | 16.63188 | 0.62648  | -1.88742 |
| H | -1.81872  | 2.73370  | -3.76445 | H | 17.22640 | 4.41536  | 0.05711  |
| C | 6.27617   | 2.79987  | 2.89530  | H | 14.87387 | 4.38055  | 0.83167  |
| C | 4.93003   | 2.92980  | 3.50497  | C | 14.93487 | 1.44226  | -0.85931 |
| C | 3.83033   | 3.39528  | 2.75658  | H | 14.29891 | 0.61025  | -1.14874 |
| H | 3.97628   | 3.69231  | 1.72211  | C | 12.21145 | 3.63524  | 0.40507  |
| C | 2.56909   | 3.50891  | 3.32428  | C | 10.88750 | 3.60158  | 0.82988  |
| H | 1.72747   | 3.87259  | 2.74356  | H | 10.30875 | 4.52056  | 0.84906  |

|   |          |          |          |                        |                          |          |          |
|---|----------|----------|----------|------------------------|--------------------------|----------|----------|
| H | 12.64315 | 4.57965  | 0.08543  | H                      | 5.55611                  | 2.24023  | 0.94514  |
| H | 12.94326 | 0.35188  | 0.75354  | H                      | -1.12071                 | 0.74978  | -6.92861 |
| H | 11.57656 | -2.99771 | 2.15914  | H                      | 1.00533                  | 3.03884  | 6.37821  |
| H | 9.92327  | -2.36048 | 2.36165  |                        |                          |          |          |
| C | 12.25100 | -4.79884 | 0.33279  | 208                    |                          |          |          |
| C | 13.38124 | -4.00498 | 0.61041  | (M, P)-O <sub>21</sub> | Energy: -3344355.1036318 |          |          |
| C | 14.56176 | -4.56713 | 1.07625  | O                      | 17.17340                 | -5.00990 | 0.10710  |
| C | 14.65367 | -5.95223 | 1.27870  | O                      | 5.73585                  | -0.05230 | 0.71711  |
| O | 15.85584 | -6.40641 | 1.73911  | O                      | 7.05080                  | 1.64318  | -0.00814 |
| C | 16.00707 | -7.79954 | 1.95893  | O                      | 11.35289                 | -0.13348 | -0.90499 |
| H | 15.30383 | -8.16783 | 2.71771  | O                      | 9.53079                  | -1.25909 | -1.64173 |
| H | 15.86876 | -8.37244 | 1.03228  | O                      | 14.00495                 | 7.68238  | -2.58829 |
| H | 17.02861 | -7.93689 | 2.31819  | N                      | 0.28717                  | 2.18224  | 5.92196  |
| C | 13.54554 | -6.76144 | 1.00468  | C                      | 1.46937                  | 2.80312  | 6.49685  |
| H | 13.58490 | -7.83425 | 1.15577  | H                      | 1.46777                  | 2.56225  | 7.57226  |
| H | 15.43312 | -3.95362 | 1.28346  | H                      | 1.44884                  | 3.90426  | 6.42518  |
| H | 13.33402 | -2.93279 | 0.44082  | C                      | 2.75432                  | 2.26182  | 5.89131  |
| C | 12.36503 | -6.17997 | 0.53600  | C                      | 3.90505                  | 3.05420  | 5.83164  |
| H | 11.50735 | -6.81789 | 0.33928  | H                      | 3.86683                  | 4.08620  | 6.17496  |
| H | 10.95612 | -5.59345 | -1.85674 | C                      | 5.10541                  | 2.54261  | 5.33390  |
| H | 8.97232  | -4.62537 | -2.94223 | H                      | 5.98663                  | 3.17731  | 5.28964  |
| C | 9.18337  | -2.59903 | -0.23297 | C                      | 5.18505                  | 1.22191  | 4.87108  |
| H | 8.66350  | -1.78308 | 0.25704  | C                      | 4.02554                  | 0.43141  | 4.93279  |
| C | 6.53628  | -3.04838 | -2.80272 | H                      | 4.06997                  | -0.60280 | 4.59958  |
| C | 5.51856  | -2.31794 | -3.40707 | C                      | 2.83107                  | 0.94060  | 5.43470  |
| H | 4.74027  | -2.83976 | -3.95739 | H                      | 1.94353                  | 0.31809  | 5.47459  |
| H | 6.52853  | -4.13370 | -2.86116 | C                      | 6.46357                  | 0.64526  | 4.35538  |
| H | 8.31427  | -0.46179 | -1.54495 | C                      | 6.62300                  | 0.26709  | 3.00469  |
| C | 5.46724  | -0.91285 | -3.34099 | C                      | 7.80615                  | -0.34347 | 2.60168  |
| C | 4.36389  | -0.20442 | -4.04819 | H                      | 7.89195                  | -0.68433 | 1.57790  |
| C | 4.62758  | 0.78454  | -5.01004 | C                      | 8.88313                  | -0.55067 | 3.47800  |
| H | 5.65717  | 1.04888  | -5.23772 | C                      | 8.73122                  | -0.13733 | 4.80866  |
| C | 3.58966  | 1.41300  | -5.69500 | H                      | 9.55162                  | -0.25058 | 5.51178  |
| H | 3.82353  | 2.17427  | -6.43652 | C                      | 7.53656                  | 0.43979  | 5.23415  |
| C | 2.25456  | 1.07107  | -5.45235 | H                      | 7.42309                  | 0.73635  | 6.27369  |
| C | 1.14417  | 1.71886  | -6.26343 | C                      | 5.54865                  | 0.60294  | 1.98512  |
| N | -0.09091 | 1.87266  | -5.51463 | H                      | 4.56054                  | 0.28057  | 2.31627  |
| H | 0.98913  | 1.14072  | -7.19469 | H                      | 5.52454                  | 1.68515  | 1.82187  |
| H | 1.47511  | 2.72098  | -6.56815 | C                      | 10.12999                 | -1.17090 | 2.96827  |
| C | 1.98573  | 0.08897  | -4.49285 | C                      | 10.50127                 | -0.98093 | 1.62919  |
| H | 0.95565  | -0.17468 | -4.27262 | H                      | 9.91087                  | -0.30745 | 1.02245  |
| C | 3.02239  | -0.53935 | -3.80449 | C                      | 11.61906                 | -1.58864 | 1.06272  |
| H | 2.79128  | -1.28993 | -3.05320 | C                      | 12.44503                 | -2.40439 | 1.86946  |
| H | 5.58515  | 1.72504  | -2.76348 | C                      | 12.09697                 | -2.56160 | 3.22196  |
| H | 7.36339  | 1.71804  | -2.91255 | H                      | 12.71915                 | -3.19645 | 3.84722  |
| O | 8.81147  | 1.92672  | -1.13904 | C                      | 10.96075                 | -1.97066 | 3.76555  |
| C | 10.26490 | 2.40700  | 1.21151  | H                      | 10.70162                 | -2.16276 | 4.80297  |
| C | 6.43103  | 2.44045  | 1.55085  | C                      | 11.92630                 | -1.35892 | -0.40717 |

|   |          |          |          |   |           |          |          |
|---|----------|----------|----------|---|-----------|----------|----------|
| H | 13.00145 | -1.26068 | -0.57223 | C | 12.55950  | 4.36311  | -2.81093 |
| H | 11.54684 | -2.18103 | -1.01982 | H | 12.90984  | 3.36095  | -3.04167 |
| C | 13.66606 | -3.08631 | 1.35718  | C | 13.46716  | 5.41206  | -2.81987 |
| C | 13.63704 | -3.93160 | 0.24038  | H | 14.51730  | 5.24553  | -3.03888 |
| H | 12.69739 | -4.10532 | -0.27653 | C | 13.03701  | 6.72084  | -2.55550 |
| C | 14.78055 | -4.59400 | -0.21299 | C | 11.68486  | 6.95667  | -2.28256 |
| H | 14.70775 | -5.24548 | -1.07640 | H | 11.32439  | 7.95507  | -2.06246 |
| C | 15.99503 | -4.41825 | 0.45919  | C | 10.78472  | 5.88959  | -2.27719 |
| C | 16.04451 | -3.58044 | 1.58330  | H | 9.74426   | 6.08715  | -2.03435 |
| H | 16.99466 | -3.45091 | 2.09229  | C | 13.62597  | 9.02500  | -2.33150 |
| C | 14.89874 | -2.93140 | 2.02101  | H | 13.20802  | 9.14110  | -1.32270 |
| H | 14.95566 | -2.27606 | 2.88596  | H | 12.89541  | 9.38651  | -3.06741 |
| C | 17.18220 | -5.86829 | -1.02234 | H | 14.54078  | 9.61499  | -2.41223 |
| H | 16.51514 | -6.72906 | -0.88107 | O | -14.42999 | 7.57557  | -2.23402 |
| H | 18.21009 | -6.22186 | -1.12162 | O | -5.84968  | -1.20046 | 0.07537  |
| H | 16.89242 | -5.33497 | -1.93749 | O | -7.77986  | -2.28594 | 0.54896  |
| C | 6.46733  | 0.60203  | -0.22728 | O | -11.31510 | 0.98614  | 0.16446  |
| C | 10.14409 | -0.21657 | -1.52498 | O | -9.48114  | 1.57321  | 1.35526  |
| C | 0.62614  | -5.08951 | -3.59056 | O | -16.73431 | -5.42571 | 1.48804  |
| C | 1.87373  | -4.31465 | -3.50172 | N | -0.21121  | -4.94083 | -4.53961 |
| C | 2.65127  | -4.38155 | -2.33717 | C | -1.47099  | -5.66598 | -4.46667 |
| H | 2.36402  | -5.06297 | -1.53917 | H | -1.48041  | -6.41965 | -3.66031 |
| C | 3.76996  | -3.56837 | -2.17922 | H | -1.59974  | -6.20699 | -5.41558 |
| H | 4.35716  | -3.63106 | -1.26755 | C | -2.63077  | -4.69915 | -4.26898 |
| C | 4.15246  | -2.66902 | -3.18764 | C | -3.71462  | -5.03517 | -3.45205 |
| C | 3.39698  | -2.64342 | -4.37595 | H | -3.73992  | -6.00687 | -2.96320 |
| H | 3.66918  | -1.94700 | -5.16437 | C | -4.76580  | -4.13996 | -3.24663 |
| C | 2.27473  | -3.44543 | -4.52987 | H | -5.60305  | -4.43918 | -2.62246 |
| H | 1.67221  | -3.39275 | -5.43087 | C | -4.76029  | -2.87061 | -3.84489 |
| C | 5.27733  | -1.72364 | -2.98417 | C | -3.67743  | -2.54929 | -4.68243 |
| C | 5.43807  | -1.08033 | -1.75234 | H | -3.64498  | -1.56891 | -5.15017 |
| H | 4.74549  | -1.29272 | -0.94757 | C | -2.63321  | -3.44469 | -4.89192 |
| C | 6.43057  | -0.11500 | -1.53840 | H | -1.79123  | -3.16258 | -5.51560 |
| C | 7.32739  | 0.21149  | -2.58032 | C | -5.84233  | -1.86741 | -3.63332 |
| C | 7.17356  | -0.44933 | -3.80656 | C | -6.25302  | -1.42721 | -2.35343 |
| H | 7.86250  | -0.21568 | -4.61298 | C | -7.20377  | -0.41406 | -2.25526 |
| C | 6.17121  | -1.39163 | -4.01321 | H | -7.45029  | -0.02922 | -1.27438 |
| H | 6.09052  | -1.88381 | -4.97868 | C | -7.81263  | 0.16763  | -3.37827 |
| C | 8.36641  | 1.29026  | -2.49978 | C | -7.41714  | -0.29181 | -4.64226 |
| C | 9.68640  | 1.11231  | -2.02915 | H | -7.88396  | 0.10558  | -5.53894 |
| C | 10.58321 | 2.19032  | -2.04212 | C | -6.44304  | -1.27760 | -4.75778 |
| H | 11.57752 | 2.03491  | -1.64208 | H | -6.14799  | -1.62351 | -5.74476 |
| C | 10.22557 | 3.45200  | -2.53077 | C | -5.66067  | -2.02890 | -1.08996 |
| C | 8.91655  | 3.60991  | -3.01318 | H | -6.10534  | -3.00535 | -0.88230 |
| H | 8.60761  | 4.56518  | -3.42839 | H | -4.57839  | -2.14561 | -1.18246 |
| C | 8.01408  | 2.55291  | -2.99300 | C | -8.82778  | 1.23355  | -3.20010 |
| H | 7.00572  | 2.70330  | -3.36752 | C | -9.61336  | 1.26693  | -2.03800 |
| C | 11.19414 | 4.57547  | -2.53955 | H | -9.52577  | 0.45246  | -1.33108 |

|   |           |          |          |   |           |          |          |
|---|-----------|----------|----------|---|-----------|----------|----------|
| C | -10.52845 | 2.28376  | -1.77781 | C | -5.71417  | 0.76251  | 3.67681  |
| C | -10.71643 | 3.30758  | -2.73381 | C | -5.76943  | -0.01505 | 2.51552  |
| C | -9.96167  | 3.25208  | -3.91673 | H | -4.87249  | -0.15736 | 1.92453  |
| H | -10.09079 | 4.04139  | -4.65260 | C | -6.96024  | -0.61464 | 2.07976  |
| C | -9.02621  | 2.24826  | -4.14719 | C | -8.15026  | -0.43450 | 2.82027  |
| H | -8.42438  | 2.27713  | -5.05095 | C | -8.09252  | 0.36652  | 3.96830  |
| C | -11.31597 | 2.27501  | -0.47859 | H | -9.00109  | 0.51755  | 4.54358  |
| H | -10.91191 | 3.00460  | 0.22733  | C | -6.90729  | 0.95738  | 4.39002  |
| H | -12.36917 | 2.50421  | -0.65797 | H | -6.89743  | 1.54627  | 5.30317  |
| C | -11.68713 | 4.42328  | -2.54919 | C | -9.44857  | -1.12318 | 2.51837  |
| C | -11.63631 | 5.28242  | -1.44396 | C | -10.48543 | -0.58505 | 1.72478  |
| H | -10.86582 | 5.14255  | -0.69085 | C | -11.67609 | -1.30547 | 1.54956  |
| C | -12.52945 | 6.34657  | -1.29645 | H | -12.46168 | -0.86082 | 0.95119  |
| H | -12.44647 | 6.99115  | -0.42879 | C | -11.88823 | -2.55209 | 2.14865  |
| C | -13.50548 | 6.57235  | -2.27339 | C | -10.85503 | -3.06864 | 2.94718  |
| C | -13.56872 | 5.72761  | -3.39144 | H | -10.97006 | -4.04385 | 3.41197  |
| H | -14.33241 | 5.91426  | -4.14016 | C | -9.66868  | -2.36677 | 3.12423  |
| C | -12.67239 | 4.67614  | -3.52315 | H | -8.87696  | -2.79889 | 3.72919  |
| H | -12.73963 | 4.02399  | -4.38985 | C | -13.15722 | -3.29371 | 1.94935  |
| C | -14.41180 | 8.46197  | -1.12654 | C | -13.82537 | -3.27493 | 0.71772  |
| H | -15.22469 | 9.17028  | -1.29667 | H | -13.39379 | -2.72846 | -0.11621 |
| H | -13.46199 | 9.00932  | -1.06239 | C | -15.01968 | -3.96924 | 0.51760  |
| H | -14.58565 | 7.93107  | -0.18111 | H | -15.49563 | -3.93443 | -0.45574 |
| C | -6.94107  | -1.46055 | 0.84716  | C | -15.57542 | -4.70952 | 1.56731  |
| C | -10.34493 | 0.76031  | 1.09308  | C | -14.92131 | -4.74177 | 2.80783  |
| C | -0.73659  | 2.90700  | 5.69910  | H | -15.36930 | -5.31190 | 3.61577  |
| C | -1.99006  | 2.36347  | 5.14970  | C | -13.73517 | -4.04576 | 2.99011  |
| C | -2.06238  | 1.05212  | 4.65145  | H | -13.25880 | -4.06395 | 3.96652  |
| H | -1.16747  | 0.43883  | 4.66884  | C | -17.44188 | -5.42331 | 0.25836  |
| C | -3.25868  | 0.55080  | 4.15825  | H | -18.32496 | -6.04420 | 0.41999  |
| H | -3.30264  | -0.47178 | 3.79373  | H | -16.84112 | -5.85260 | -0.55441 |
| C | -4.43091  | 1.33108  | 4.15934  | H | -17.75767 | -4.41022 | -0.02402 |
| C | -4.35285  | 2.64298  | 4.65295  | H | 0.43612   | -5.78162 | -2.75222 |
| H | -5.23792  | 3.27298  | 4.64004  | H | -0.74451  | 3.98796  | 5.92135  |
| C | -3.14803  | 3.15364  | 5.13042  |   |           |          |          |
| H | -3.10526  | 4.17645  | 5.49892  |   |           |          |          |

## Crystallographic Data

### Compound 3 (CCDC-2371751)

**Table S2.** Crystal data and structure refinement for **3**

|                              |                                                   |
|------------------------------|---------------------------------------------------|
| Formula                      | C <sub>34</sub> H <sub>34</sub> BBrO <sub>6</sub> |
| $D_{calc.}/g\text{ cm}^{-3}$ | 1.390                                             |
| $\rho/\text{mm}^{-1}$        | 1.461                                             |
| Formula Weight               | 629.33                                            |
| Colour                       | colourless                                        |
| Shape                        | block-shaped                                      |
| Size/mm <sup>3</sup>         | 0.22×0.18×0.11                                    |
| $T/\text{K}$                 | 150                                               |
| Crystal System               | triclinic                                         |
| Space Group                  | <i>P</i> -1                                       |
| $a/\text{Å}$                 | 10.0457(4)                                        |
| $b/\text{Å}$                 | 12.3797(4)                                        |
| $c/\text{Å}$                 | 13.7545(5)                                        |
| $\alpha/^\circ$              | 94.581(3)                                         |
| $\beta/^\circ$               | 110.868(3)                                        |
| $\gamma/^\circ$              | 106.192(3)                                        |
| $V/\text{Å}^3$               | 1504.02(10)                                       |
| $Z$                          | 2                                                 |
| $Z'$                         | 1                                                 |
| Wavelength/Å                 | 1.34143                                           |
| Radiation type               | GaK $\alpha$                                      |
| $\lambda_{min}/^\circ$       | 3.301                                             |
| $\lambda_{max}/^\circ$       | 55.714                                            |
| Measured Refl's.             | 17572                                             |
| Indep't Refl's               | 5722                                              |
| Refl's $I \geq 2\sigma(I)$   | 5518                                              |
| $R_{int}$                    | 0.0180                                            |
| Parameters                   | 386                                               |
| Restraints                   | 0                                                 |
| Largest Peak                 | 0.519                                             |
| Deepest Hole                 | -0.623                                            |
| GooF                         | 1.042                                             |
| $wR_2$ (all data)            | 0.0965                                            |
| $wR_2$                       | 0.0947                                            |
| $R_1$ (all data)             | 0.0363                                            |
| $R_1$                        | 0.0347                                            |

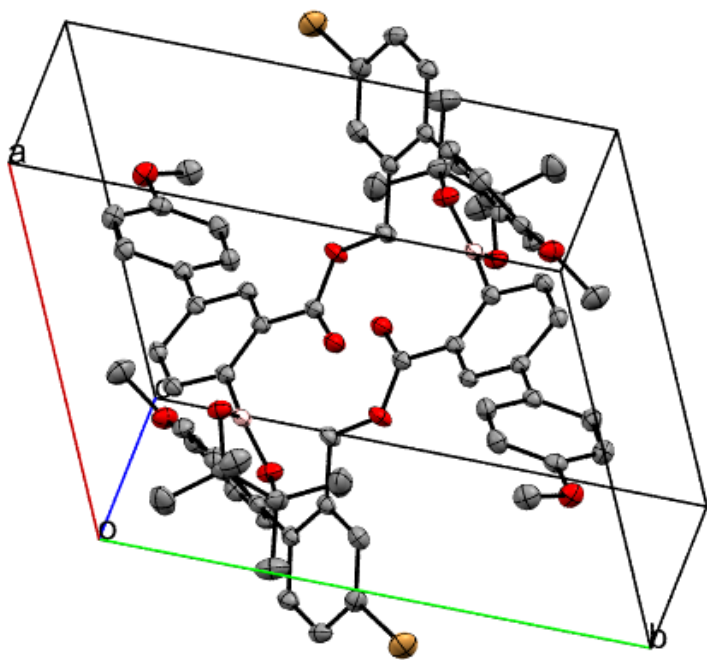

**Figure S17.** Unit-cell of the solid-state structure of **3**. Visualized as ORTEP representation with 50 % probability, hydrogens are omitted for clarity.

**Compound C<sub>1</sub> (CCDC-2374177)****Table S3.** Crystal data and structure refinement for **C<sub>1</sub>**

|                                             |                                                                |
|---------------------------------------------|----------------------------------------------------------------|
| Identification code                         | C <sub>1</sub>                                                 |
| Empirical formula                           | C <sub>64.5</sub> H <sub>57</sub> NO <sub>9</sub>              |
| Formula weight                              | 990.11                                                         |
| Temperature/K                               | 150                                                            |
| Crystal system                              | triclinic                                                      |
| Space group                                 | P-1                                                            |
| a/Å                                         | 8.4822(8)                                                      |
| b/Å                                         | 19.6804(15)                                                    |
| c/Å                                         | 34.006(4)                                                      |
| α/°                                         | 94.828(7)                                                      |
| β/°                                         | 95.563(8)                                                      |
| γ/°                                         | 97.248(7)                                                      |
| Volume/Å <sup>3</sup>                       | 5578.0(9)                                                      |
| Z                                           | 4                                                              |
| ρ <sub>calc</sub> /cm <sup>3</sup>          | 1.179                                                          |
| μ/mm <sup>-1</sup>                          | 0.399                                                          |
| F(000)                                      | 2092.0                                                         |
| Crystal size/mm <sup>3</sup>                | 0.24 × 0.2 × 0.03                                              |
| Radiation                                   | GaKα (λ = 1.34143)                                             |
| 2θ range for data collection/°              | 3.956 to 118.2                                                 |
| Index ranges                                | -10 ≤ h ≤ 5, -24 ≤ k ≤ 24, -42 ≤ l ≤ 43                        |
| Reflections collected                       | 59228                                                          |
| Independent reflections                     | 23242 [R <sub>int</sub> = 0.0158, R <sub>sigma</sub> = 0.0190] |
| Data/restraints/parameters                  | 23242/2/1342                                                   |
| Goodness-of-fit on F <sup>2</sup>           | 1.047                                                          |
| Final R indexes [I ≥ 2σ (I)]                | R <sub>1</sub> = 0.0935, wR <sub>2</sub> = 0.2657              |
| Final R indexes [all data]                  | R <sub>1</sub> = 0.1151, wR <sub>2</sub> = 0.2859              |
| Largest diff. peak/hole / e Å <sup>-3</sup> | 1.27/-0.73                                                     |



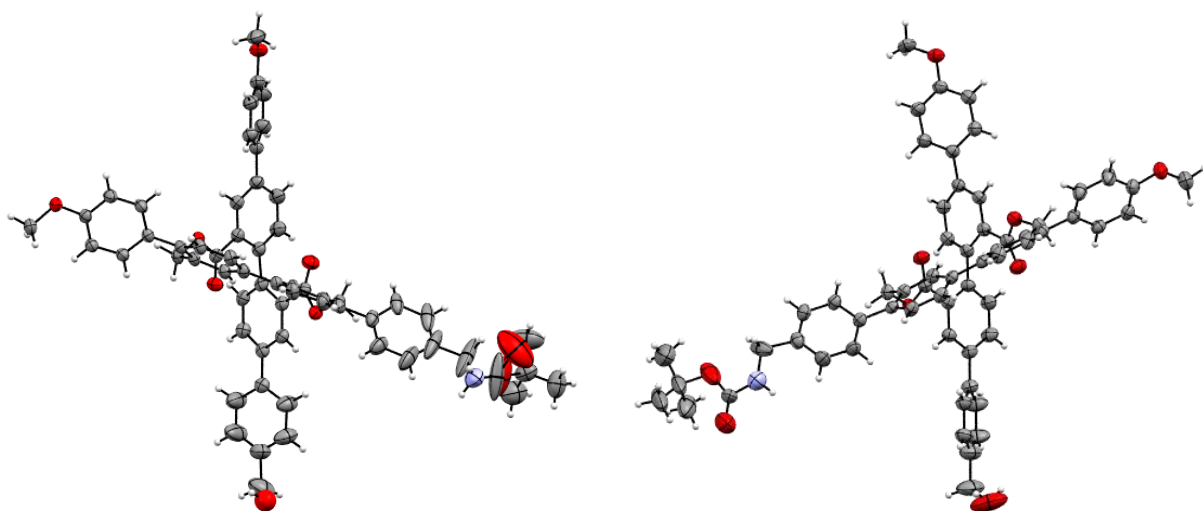

**Figure S18.** Solid state structure of (*M*)-**C**<sub>1</sub> (left) and (*P*)-**C**<sub>1</sub> (right). Visualized as ORTEP representation with 50 % probability, solvent molecules are omitted for clarity.

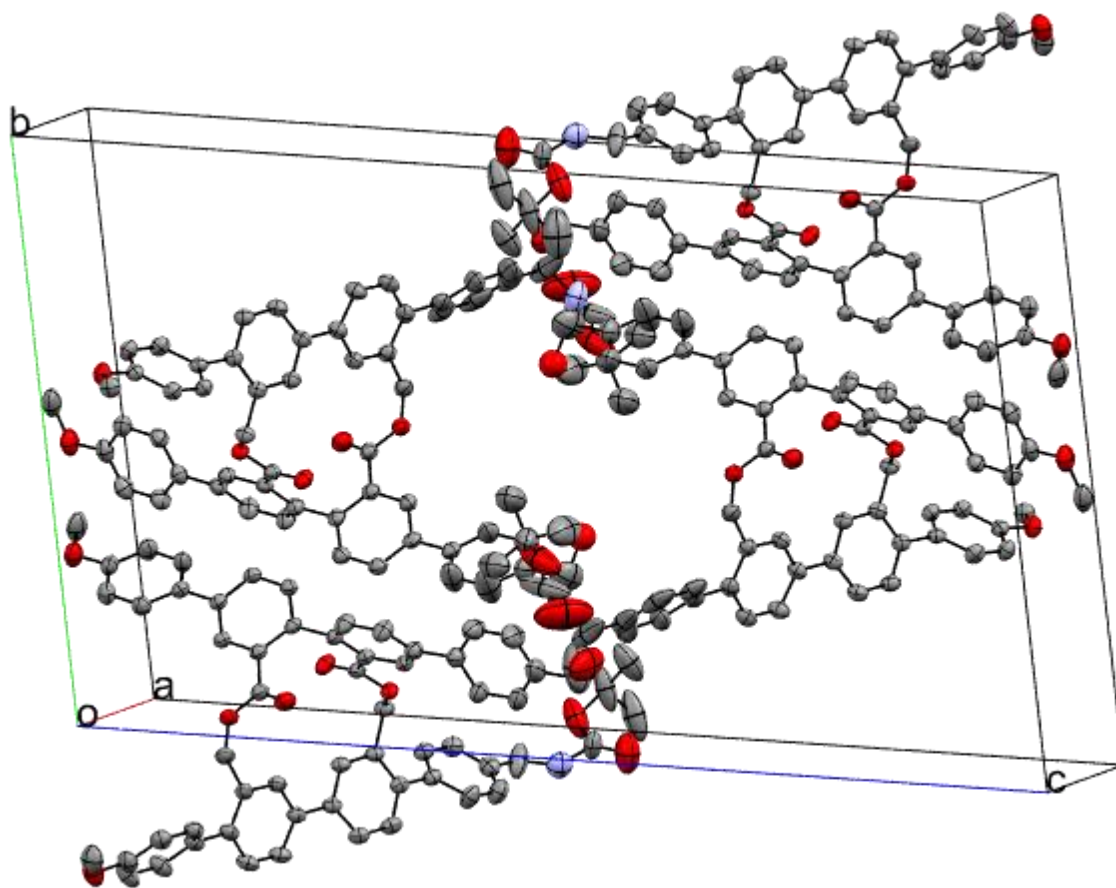

**Figure S19.** Unit-cell of the solid-state structure of **C**<sub>1</sub>. Visualized as ORTEP representation with 50 % probability, hydrogens are omitted for clarity.

## References

- [1] M. J. Frisch, G. W. Trucks, H. B. Schlegel, G. E. Scuseria, M. A. Robb, J. R. Cheeseman, G. Scalmani, V. Barone, G. A. Petersson, H. Nakatsuji, X. Li, M. Caricato, A. Marenich, J. Bloino, B. G. Janesko, R. Gomperts, B. Mennucci, H. P. Hratchian, J. V. Ortiz, A. F. Izmaylov, J. L. Sonnenberg, D. Williams-Young, F. Ding, F. Lipparini, F. Egidi, J. Goings, B. Peng, A. Petrone, T. Henderson, D. Ranasinghe, V. G. Zakrzewski, J. Gao, N. Rega, G. Zheng, W. Liang, M. Hada, M. Ehara, K. Toyota, R. Fukuda, J. Hasegawa, M. Ishida, T. Nakajima, Y. Honda, O. Kitao, H. Nakai, T. Vreven, K. Throssell, J. A. Montgomery, Jr., J. E. Peralta, F. Ogliaro, M. Bearpark, J. J. Heyd, E. Brothers, K. N. Kudin, V. N. Staroverov, T. Keith, R. Kobayashi, J. Normand, K. Raghavachari, A. Rendell, J. C. Burant, S. S. Iyengar, J. Tomasi, M. Cossi, J. M. Millam, M. Klene, C. Adamo, R. Cammi, J. W. Ochterski, R. L. Martin, K. Morokuma, O. Farkas, J. B. Foresman, and D. J. Fox, *Gaussian 09*, Revision E.01.
- [2] J. J. Dressler, S. A. Miller, B. T. Meeuwsen, A. M. S. Riel, B. J. Dahl, *Tetrahedron* **2015**, *71*, 283–292.
- [3] G. Pescitelli, T. Bruhn, *Chirality* **2016**, *28*, 466–474.
- [4] T. Bruhn, A. Schaumlöffel, Y. Hemberger, G. Bringmann, *Chirality* **2013**, *25*, 243–249.

# NMR and HR-ESI-MS spectra

<sup>1</sup>H-NMR spectra of 5 in CD<sub>2</sub>Cl<sub>2</sub>

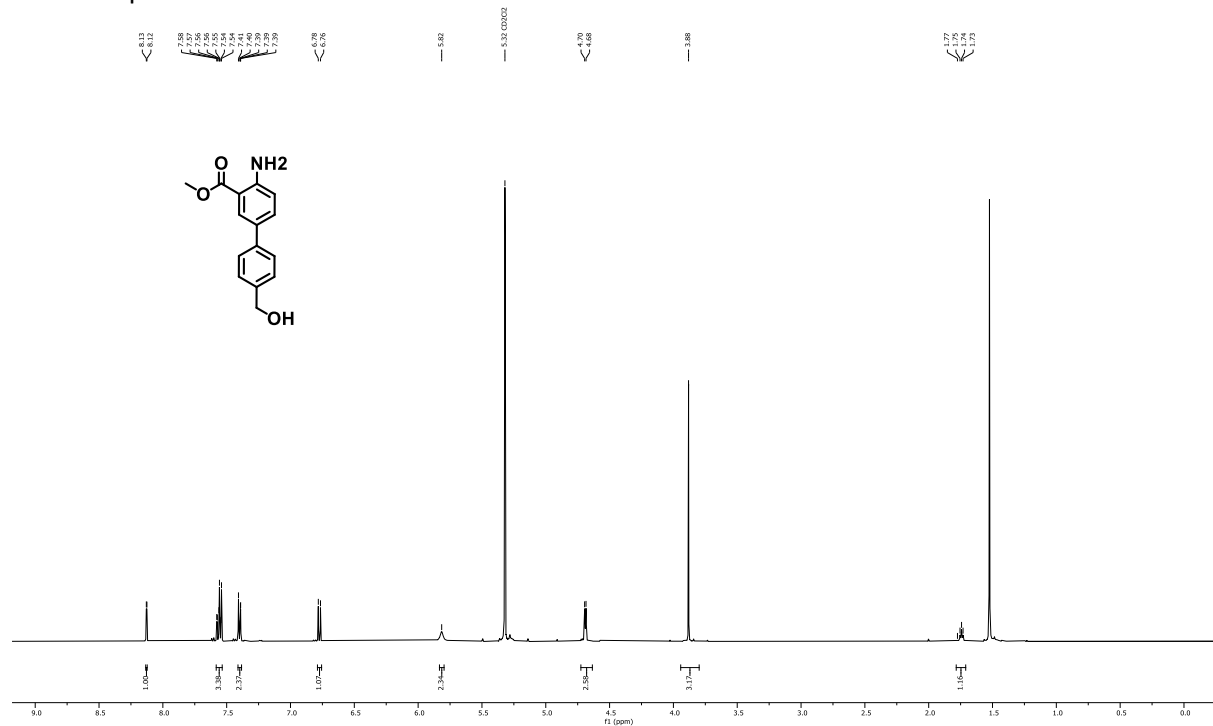

<sup>13</sup>C-NMR spectra of 5 in CD<sub>2</sub>Cl<sub>2</sub>

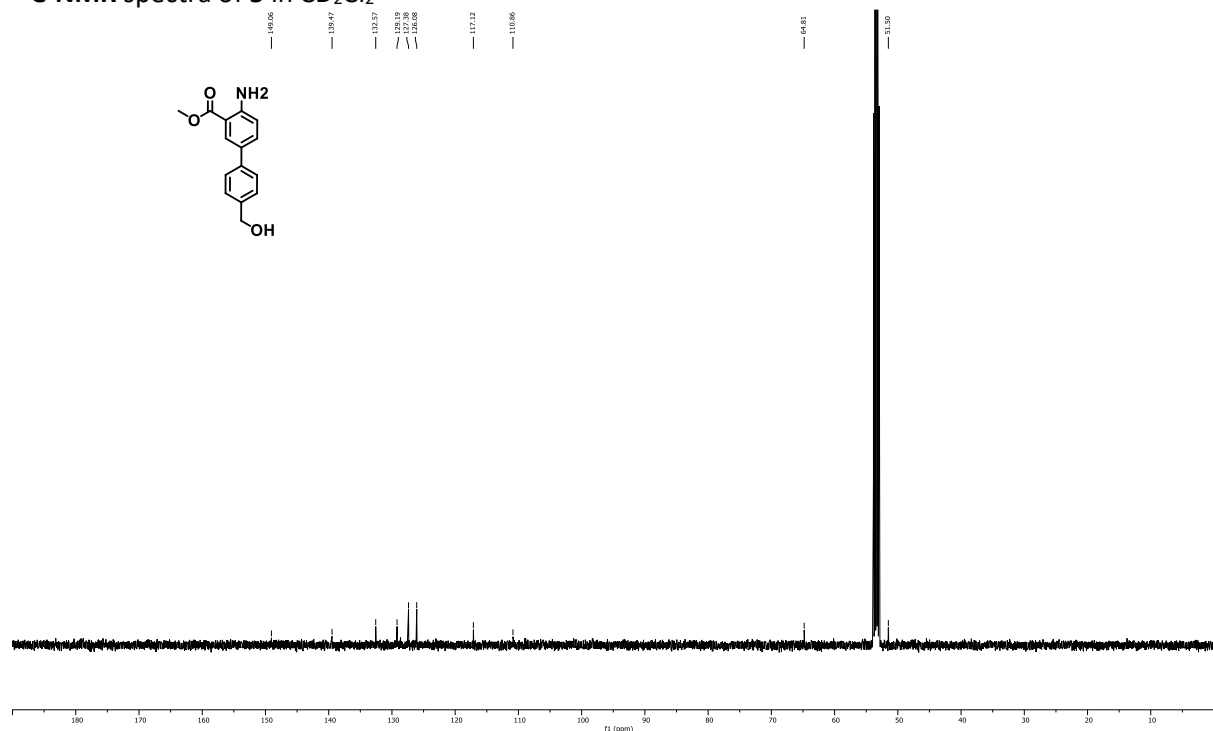

## High Resolution Mass Spectrometry Report

Sample Name **KRO-310**  
Comment

Instrument **maXis 4G**  
Method **ms\_nocolumn\_mid\_pos.m**

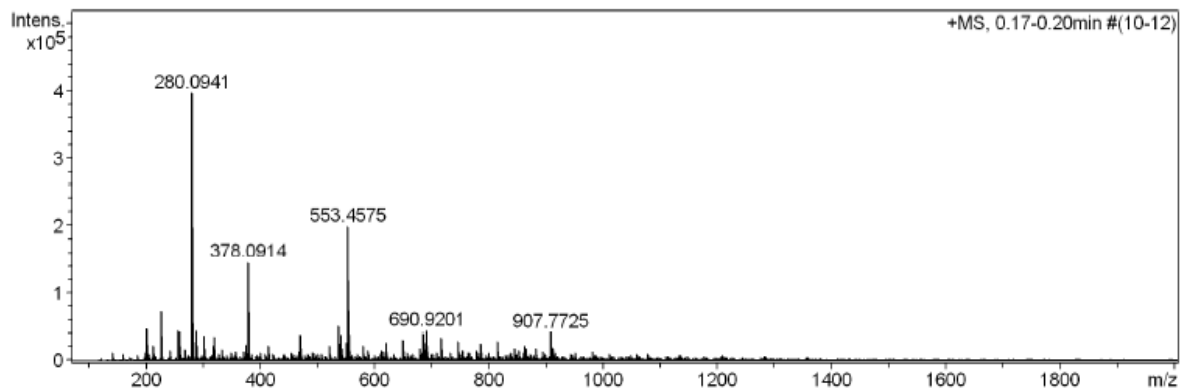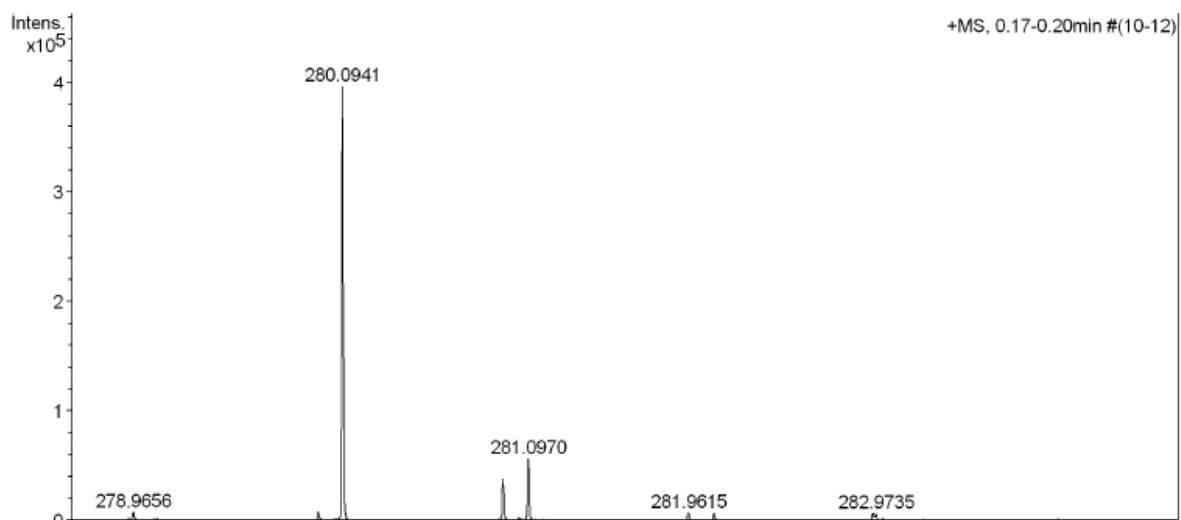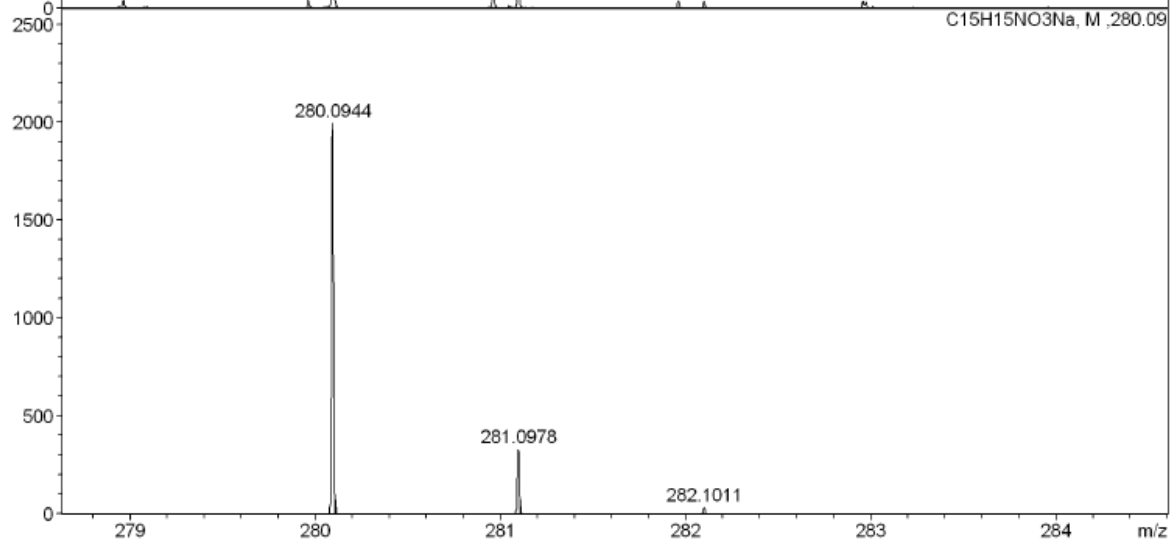

# High Resolution Mass Spectrometry Report

## Measured m/z vs. theoretical m/z

| Meas. m/z | # | Formula            | Score  | m/z      | err [mDa] | err [ppm] | mSigma | rdb | e <sup>-</sup> Conf | z  |
|-----------|---|--------------------|--------|----------|-----------|-----------|--------|-----|---------------------|----|
| 280.0941  | 1 | C 15 H 15 N Na O 3 | 100.00 | 280.0944 | 0.3       | 1.0       | 13.4   | 8.5 | even                | 1+ |

## Mass list

| #  | m/z      | I %   | I      |
|----|----------|-------|--------|
| 1  | 141.0028 | 2.8   | 11191  |
| 2  | 198.9929 | 2.9   | 11676  |
| 3  | 201.1097 | 12.1  | 47970  |
| 4  | 212.9720 | 5.4   | 21406  |
| 5  | 226.0861 | 18.7  | 74087  |
| 6  | 227.0891 | 3.0   | 11999  |
| 7  | 242.9823 | 3.8   | 14994  |
| 8  | 256.9617 | 11.2  | 44424  |
| 9  | 258.1119 | 10.8  | 42698  |
| 10 | 266.9812 | 4.3   | 17215  |
| 11 | 280.0941 | 100.0 | 397163 |
| 12 | 280.9609 | 9.6   | 37998  |
| 13 | 281.0970 | 14.3  | 56764  |
| 14 | 286.9719 | 11.5  | 45586  |
| 15 | 301.0742 | 3.7   | 14783  |
| 16 | 302.0756 | 9.3   | 37105  |
| 17 | 316.9822 | 5.3   | 20918  |
| 18 | 319.2597 | 3.0   | 12009  |
| 19 | 320.0860 | 8.9   | 35202  |
| 20 | 327.0006 | 2.5   | 9982   |
| 21 | 334.1012 | 4.4   | 17285  |
| 22 | 348.0803 | 2.7   | 10890  |
| 23 | 356.9742 | 3.2   | 12830  |
| 24 | 370.9900 | 3.4   | 13488  |
| 25 | 374.0902 | 5.7   | 22570  |
| 26 | 378.0914 | 36.7  | 145878 |
| 27 | 379.0943 | 6.7   | 26600  |
| 28 | 400.0728 | 2.8   | 11020  |
| 29 | 414.9794 | 5.3   | 21182  |
| 30 | 441.2957 | 2.5   | 10001  |
| 31 | 452.9564 | 3.0   | 11912  |
| 32 | 467.0997 | 3.5   | 14010  |
| 33 | 469.3269 | 9.7   | 38531  |
| 34 | 470.3301 | 3.1   | 12300  |
| 35 | 482.9664 | 2.6   | 10342  |
| 36 | 490.9331 | 3.1   | 12191  |
| 37 | 492.9482 | 2.9   | 11496  |
| 38 | 502.0080 | 2.7   | 10617  |
| 39 | 506.9638 | 2.6   | 10267  |
| 40 | 520.9437 | 5.4   | 21507  |
| 41 | 536.1632 | 3.4   | 13509  |
| 42 | 537.1976 | 13.2  | 52572  |
| 43 | 538.2008 | 4.5   | 17861  |
| 44 | 541.1185 | 9.5   | 37913  |
| 45 | 542.1194 | 4.5   | 17961  |
| 46 | 543.1168 | 3.4   | 13341  |
| 47 | 550.9543 | 6.7   | 26799  |
| 48 | 553.4575 | 50.2  | 199383 |
| 49 | 554.4606 | 19.0  | 75421  |
| 50 | 555.4636 | 3.8   | 14986  |
| 51 | 580.9647 | 5.6   | 22257  |
| 52 | 588.9309 | 3.9   | 15565  |
| 53 | 590.9458 | 2.5   | 9917   |
| 54 | 610.9754 | 3.6   | 14405  |
| 55 | 615.1377 | 3.4   | 13650  |
| 56 | 618.9417 | 6.7   | 26560  |
| 57 | 648.9526 | 7.5   | 29801  |
| 58 | 656.9190 | 3.0   | 11734  |
| 59 | 678.9631 | 4.5   | 18004  |
| 60 | 682.9462 | 3.0   | 11875  |
| 61 | 685.4337 | 10.0  | 39604  |
| 62 | 686.4369 | 4.5   | 18035  |

## High Resolution Mass Spectrometry Report

| #   | m/z       | I%   | I     |
|-----|-----------|------|-------|
| 63  | 686.9292  | 6.8  | 27055 |
| 64  | 688.9265  | 4.4  | 17277 |
| 65  | 689.1563  | 3.4  | 13318 |
| 66  | 690.9201  | 11.3 | 44777 |
| 67  | 691.9215  | 3.4  | 13364 |
| 68  | 697.9516  | 2.6  | 10394 |
| 69  | 708.9736  | 2.8  | 10954 |
| 70  | 716.9402  | 8.4  | 33554 |
| 71  | 731.9463  | 3.0  | 11816 |
| 72  | 746.9512  | 7.2  | 28418 |
| 73  | 750.9342  | 2.6  | 10474 |
| 74  | 754.9175  | 3.9  | 15596 |
| 75  | 763.1757  | 2.9  | 11543 |
| 76  | 765.9403  | 3.0  | 11754 |
| 77  | 776.9616  | 3.7  | 14574 |
| 78  | 780.9447  | 3.0  | 12095 |
| 79  | 784.9287  | 6.4  | 25607 |
| 80  | 799.9340  | 2.8  | 10966 |
| 81  | 814.9387  | 7.0  | 27813 |
| 82  | 839.9329  | 2.9  | 11563 |
| 83  | 844.9495  | 4.6  | 18223 |
| 84  | 848.9333  | 2.5  | 9882  |
| 85  | 852.9163  | 3.8  | 14936 |
| 86  | 860.9488  | 3.0  | 11738 |
| 87  | 862.9435  | 5.5  | 21993 |
| 88  | 863.9415  | 4.4  | 17607 |
| 89  | 882.9272  | 4.7  | 18836 |
| 90  | 893.9447  | 3.5  | 14025 |
| 91  | 907.7725  | 10.6 | 41919 |
| 92  | 908.7762  | 6.6  | 26309 |
| 93  | 909.7824  | 3.2  | 12899 |
| 94  | 912.9383  | 4.6  | 18190 |
| 95  | 916.9500  | 3.0  | 11732 |
| 96  | 942.9496  | 2.7  | 10662 |
| 97  | 950.9151  | 2.8  | 10982 |
| 98  | 980.9266  | 3.3  | 13114 |
| 99  | 1010.9385 | 2.7  | 10671 |
| 100 | 1078.9263 | 2.6  | 10282 |

### Acquisition Parameter

|                   |                              |                |                                       |                |              |           |
|-------------------|------------------------------|----------------|---------------------------------------|----------------|--------------|-----------|
| <b>General</b>    | Fore Vacuum                  | 3.40e+000 mBar | High Vacuum                           | 1.24e-007 mBar | Source Type  | ESI       |
|                   | Scan Begin                   | 75 m/z         | Scan End                              | 2000 m/z       | Ion Polarity | Positive  |
| <b>Source</b>     | Set Nebulizer                | 2.0 Bar        | Set Capillary                         | 4500 V         | Set Dry Gas  | 8.0 l/min |
|                   | Set Dry Heater               | 200 °C         | Set End Plate Offset                  | -500 V         |              |           |
| <b>Quadrupole</b> | Set Ion Energy ( MS only )   | 4.0 eV         |                                       |                |              |           |
| <b>Coll. Cell</b> | Collision Energy             | 8.0 eV         | Set Collision Cell RF                 | 600.0 Vpp      |              | 100.0 Vpp |
| <b>Ion Cooler</b> | Set Ion Cooler Transfer Time | 75.0 µs        | Set Ion Cooler Pre Pulse Storage Time |                |              | 10.0 µs   |

### <sup>1</sup>H-NMR spectra of 6 in CD<sub>2</sub>Cl<sub>2</sub>

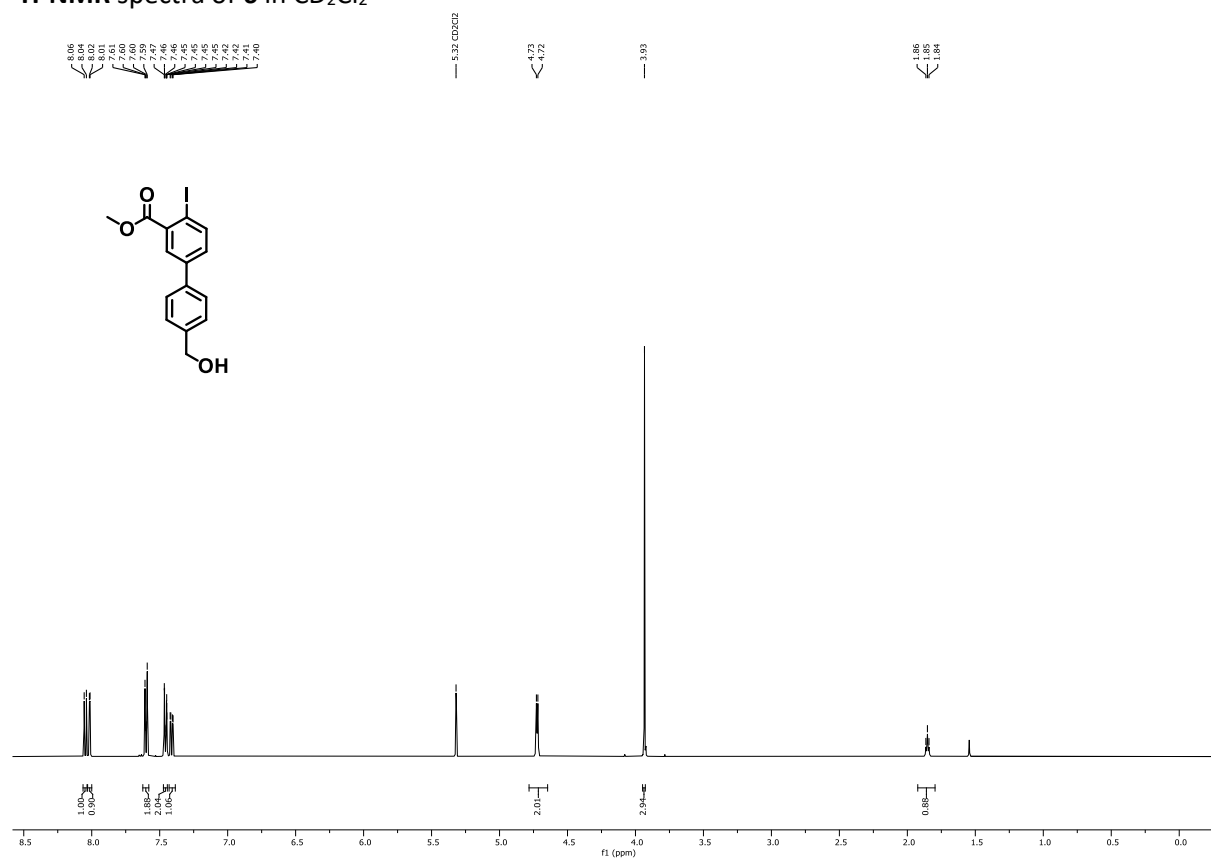

### <sup>13</sup>C-NMR spectra of 6 in CD<sub>2</sub>Cl<sub>2</sub>

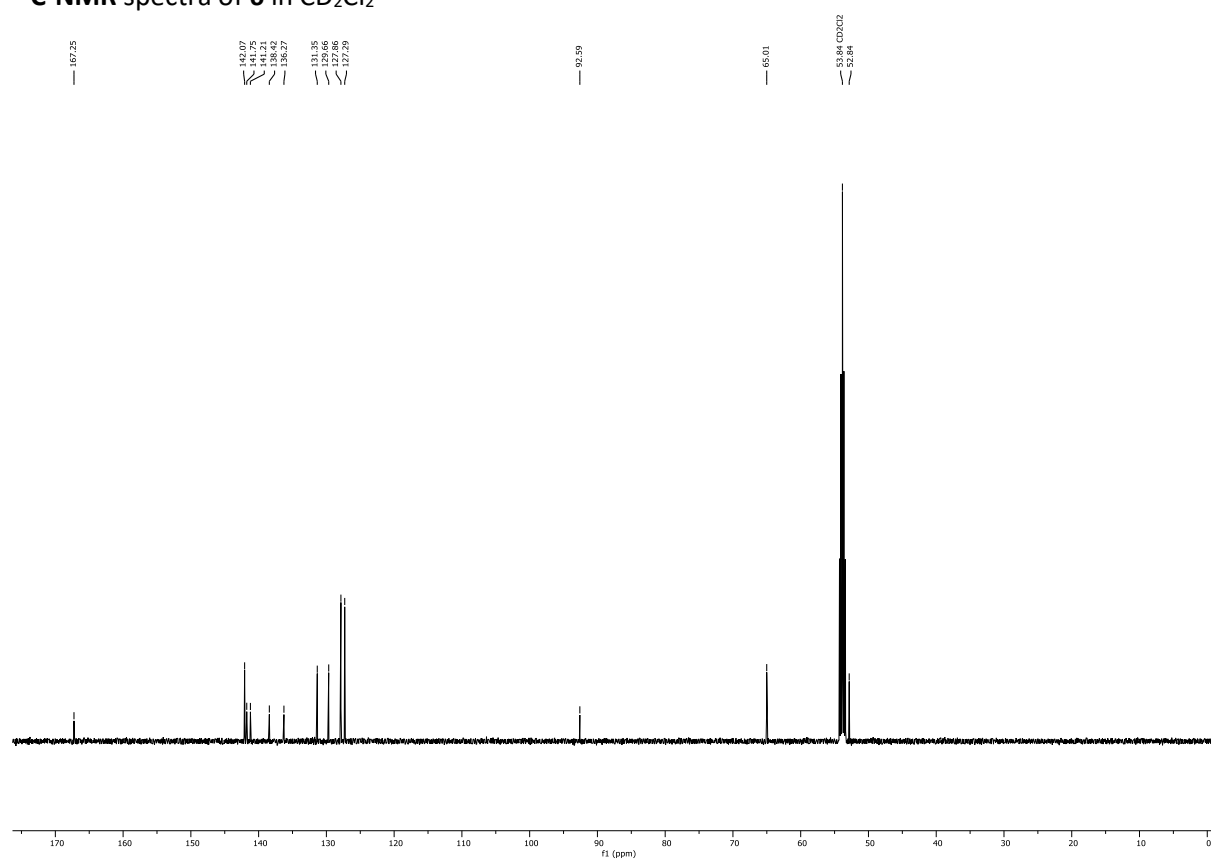

# HR-ESI-MS spectra of 6

## High Resolution Mass Spectrometry Report

Sample Name **KRO225**  
Comment

Instrument **maXis 4G**  
Method **ms\_nocolumn\_low\_pos.m**

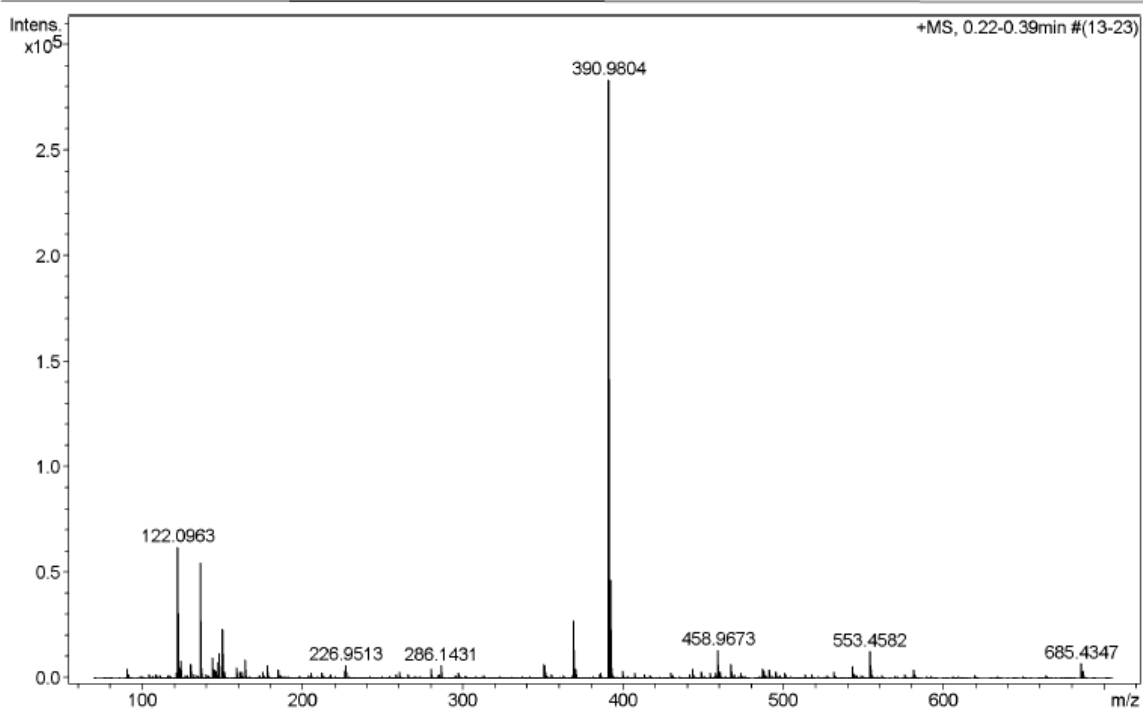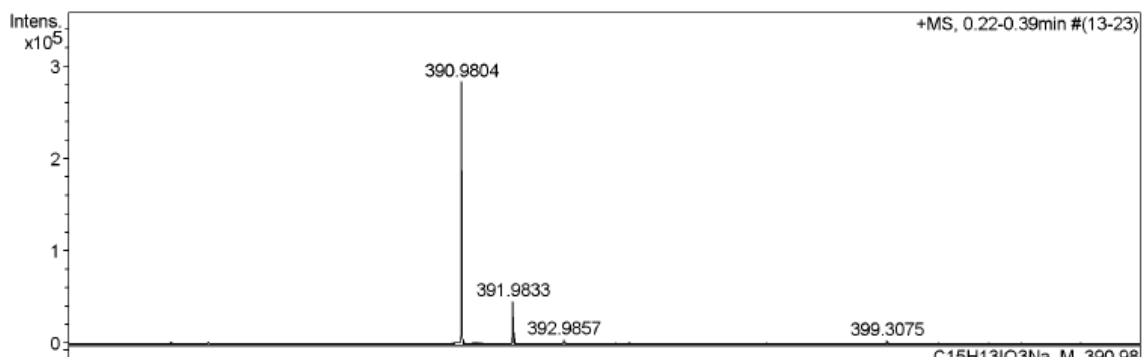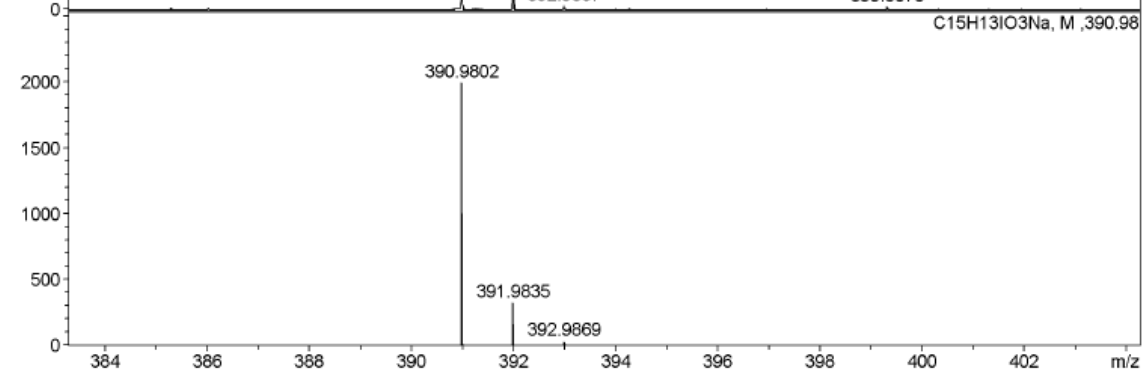



# High Resolution Mass Spectrometry Report

## Measured m/z vs. theoretical m/z

| Meas. m/z | # | Formula            | Score  | m/z      | err [mDa] | err [ppm] | mSigma | rdb | e <sup>-</sup> Conf | z  |
|-----------|---|--------------------|--------|----------|-----------|-----------|--------|-----|---------------------|----|
| 368.9980  | 1 | C 15 H 14 I O 3    | 100.00 | 368.9982 | 0.2       | 0.6       | 10.7   | 8.5 | even                | 1+ |
| 386.0245  | 1 | C 15 H 17 I N O 3  | 100.00 | 386.0248 | 0.3       | 0.7       | 96.4   | 7.5 | even                |    |
| 390.9804  | 1 | C 15 H 13 I Na O 3 | 100.00 | 390.9802 | -0.3      | -0.7      | 0.9    | 8.5 | even                |    |
| 406.9543  | 1 | C 15 H 13 I K O 3  | 100.00 | 406.9541 | -0.2      | -0.5      | 93.1   | 8.5 | even                |    |

## Mass list

| #  | m/z      | I%    | I      |
|----|----------|-------|--------|
| 1  | 90.5069  | 1.5   | 4292   |
| 2  | 91.5046  | 0.6   | 1838   |
| 3  | 103.9552 | 0.8   | 2157   |
| 4  | 108.0807 | 0.8   | 2187   |
| 5  | 111.0201 | 0.5   | 1496   |
| 6  | 121.0885 | 0.8   | 2293   |
| 7  | 122.0963 | 21.9  | 62075  |
| 8  | 123.0806 | 1.2   | 3497   |
| 9  | 123.0990 | 1.8   | 5148   |
| 10 | 124.0867 | 2.8   | 7982   |
| 11 | 128.1069 | 0.6   | 1586   |
| 12 | 129.9874 | 0.6   | 1697   |
| 13 | 130.1589 | 2.3   | 6649   |
| 14 | 131.9618 | 0.7   | 2124   |
| 15 | 134.0962 | 0.5   | 1498   |
| 16 | 136.1120 | 19.3  | 54822  |
| 17 | 137.1152 | 1.8   | 5176   |
| 18 | 139.9877 | 0.6   | 1757   |
| 19 | 143.9589 | 3.4   | 9766   |
| 20 | 144.9822 | 1.4   | 3886   |
| 21 | 145.9544 | 1.3   | 3747   |
| 22 | 146.9802 | 0.7   | 2117   |
| 23 | 147.0915 | 2.7   | 7793   |
| 24 | 147.9310 | 4.1   | 11702  |
| 25 | 148.0873 | 0.7   | 2101   |
| 26 | 148.1120 | 0.8   | 2160   |
| 27 | 149.9306 | 3.9   | 11050  |
| 28 | 150.1276 | 8.2   | 23199  |
| 29 | 151.1307 | 1.0   | 2862   |
| 30 | 158.9640 | 1.8   | 5089   |
| 31 | 161.1073 | 1.0   | 2948   |
| 32 | 162.1275 | 1.0   | 2845   |
| 33 | 164.1432 | 3.0   | 8613   |
| 34 | 175.1229 | 1.1   | 3130   |
| 35 | 178.1588 | 2.1   | 5951   |
| 36 | 184.9856 | 1.4   | 3992   |
| 37 | 186.9809 | 0.5   | 1538   |
| 38 | 205.0600 | 0.8   | 2290   |
| 39 | 212.1431 | 0.8   | 2378   |
| 40 | 217.1041 | 0.6   | 1698   |
| 41 | 226.0862 | 1.2   | 3448   |
| 42 | 226.1590 | 0.5   | 1483   |
| 43 | 226.9513 | 2.2   | 6194   |
| 44 | 258.1124 | 0.7   | 1997   |
| 45 | 260.2008 | 1.1   | 3050   |
| 46 | 265.9625 | 0.7   | 2120   |
| 47 | 280.0703 | 1.7   | 4732   |
| 48 | 285.1355 | 0.7   | 2076   |
| 49 | 286.1431 | 2.1   | 6015   |
| 50 | 297.0725 | 0.8   | 2225   |
| 51 | 313.0681 | 0.5   | 1475   |
| 52 | 350.2662 | 2.3   | 6607   |
| 53 | 350.9876 | 2.1   | 5903   |
| 54 | 355.2821 | 0.7   | 1887   |
| 55 | 368.9980 | 9.7   | 27388  |
| 56 | 370.0015 | 1.6   | 4439   |
| 57 | 385.2912 | 0.6   | 1829   |
| 58 | 386.0245 | 0.8   | 2235   |
| 59 | 390.9804 | 100.0 | 283495 |

## High Resolution Mass Spectrometry Report

| #   | m/z      | I%   | I     |
|-----|----------|------|-------|
| 60  | 391.9833 | 16.3 | 46299 |
| 61  | 392.9857 | 1.7  | 4945  |
| 62  | 399.3075 | 1.3  | 3695  |
| 63  | 406.9543 | 0.9  | 2680  |
| 64  | 413.3233 | 0.7  | 1993  |
| 65  | 429.3183 | 0.9  | 2589  |
| 66  | 441.2971 | 0.6  | 1838  |
| 67  | 443.3336 | 1.6  | 4538  |
| 68  | 448.9384 | 1.0  | 2872  |
| 69  | 453.7855 | 0.8  | 2384  |
| 70  | 457.3489 | 0.9  | 2530  |
| 71  | 458.9673 | 4.7  | 13455 |
| 72  | 459.9701 | 1.0  | 2752  |
| 73  | 467.0109 | 2.3  | 6419  |
| 74  | 468.0144 | 0.5  | 1532  |
| 75  | 469.3279 | 0.8  | 2195  |
| 76  | 473.3439 | 0.8  | 2384  |
| 77  | 486.8226 | 1.5  | 4351  |
| 78  | 487.3601 | 1.3  | 3739  |
| 79  | 487.8233 | 0.5  | 1553  |
| 80  | 490.8177 | 1.4  | 3949  |
| 81  | 494.8118 | 1.0  | 2773  |
| 82  | 500.3005 | 0.8  | 2323  |
| 83  | 500.8026 | 0.5  | 1508  |
| 84  | 501.3754 | 0.7  | 1950  |
| 85  | 513.7834 | 0.6  | 1760  |
| 86  | 517.3715 | 0.7  | 1891  |
| 87  | 531.3861 | 1.0  | 2894  |
| 88  | 543.0419 | 1.9  | 5458  |
| 89  | 544.0454 | 0.6  | 1841  |
| 90  | 545.4015 | 0.5  | 1468  |
| 91  | 553.4582 | 4.5  | 12786 |
| 92  | 554.4618 | 1.7  | 4723  |
| 93  | 561.3962 | 0.5  | 1483  |
| 94  | 575.4121 | 0.7  | 2030  |
| 95  | 580.9529 | 1.4  | 3900  |
| 96  | 581.4549 | 0.7  | 1867  |
| 97  | 581.9521 | 0.7  | 2000  |
| 98  | 619.4382 | 0.6  | 1608  |
| 99  | 685.4347 | 2.5  | 6993  |
| 100 | 686.4382 | 1.2  | 3267  |

### Acquisition Parameter

|            |                              |                |                                       |                |              |           |
|------------|------------------------------|----------------|---------------------------------------|----------------|--------------|-----------|
| General    | Fore Vacuum                  | 3.38e+000 mBar | High Vacuum                           | 9.12e-008 mBar | Source Type  | ESI       |
|            | Scan Begin                   | 75 m/z         | Scan End                              | 700 m/z        | Ion Polarity | Positive  |
| Source     | Set Nebulizer                | 2.0 Bar        | Set Capillary                         | 4500 V         | Set Dry Gas  | 8.0 l/min |
|            | Set Dry Heater               | 200 °C         | Set End Plate Offset                  | -500 V         |              |           |
| Quadrupole | Set Ion Energy ( MS only )   | 4.0 eV         |                                       |                |              |           |
| Coll. Cell | Collision Energy             | 8.0 eV         | Set Collision Cell RF                 | 350.0 Vpp      | 55.0 Vpp     |           |
| Ion Cooler | Set Ion Cooler Transfer Time | 55.0 µs        | Set Ion Cooler Pre Pulse Storage Time | 7.0 µs         |              |           |

### <sup>1</sup>H-NMR spectra of 7 in acetone-d<sub>6</sub>

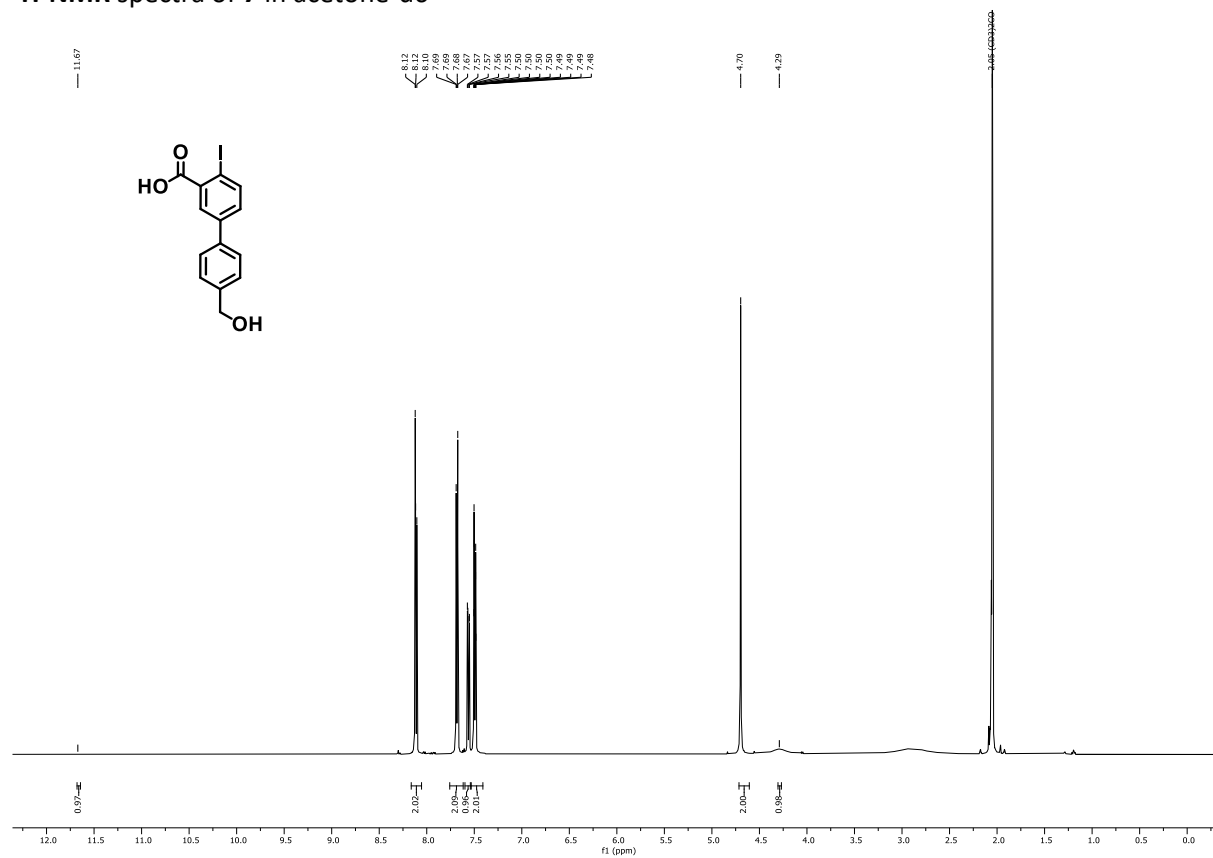

### <sup>13</sup>C-NMR spectra of 7 in acetone-d<sub>6</sub>

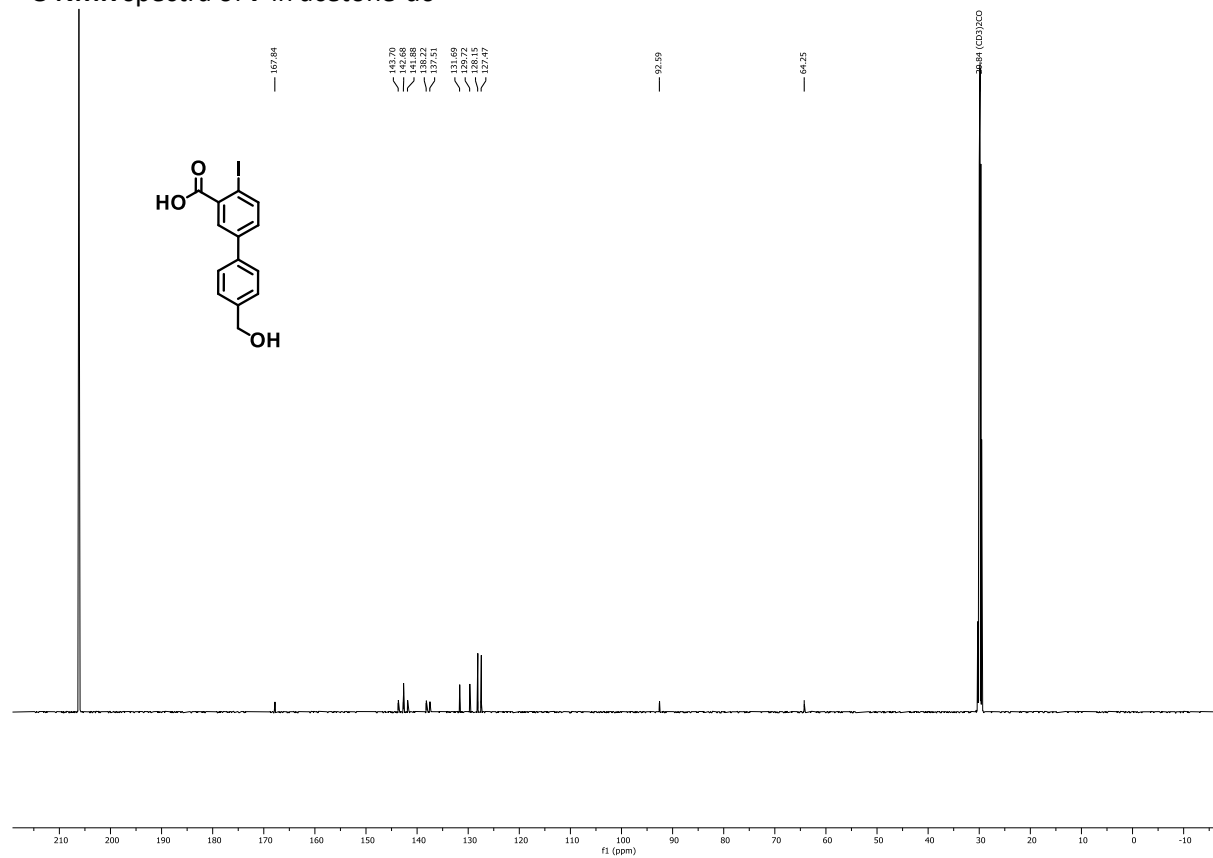

# HR-ESI-MS spectra of 7

## High Resolution Mass Spectrometry Report

Sample Name **KRO-227**  
Comment

Instrument **maXis 4G**  
Method **ms\_nocolumn\_mid\_pos.m**

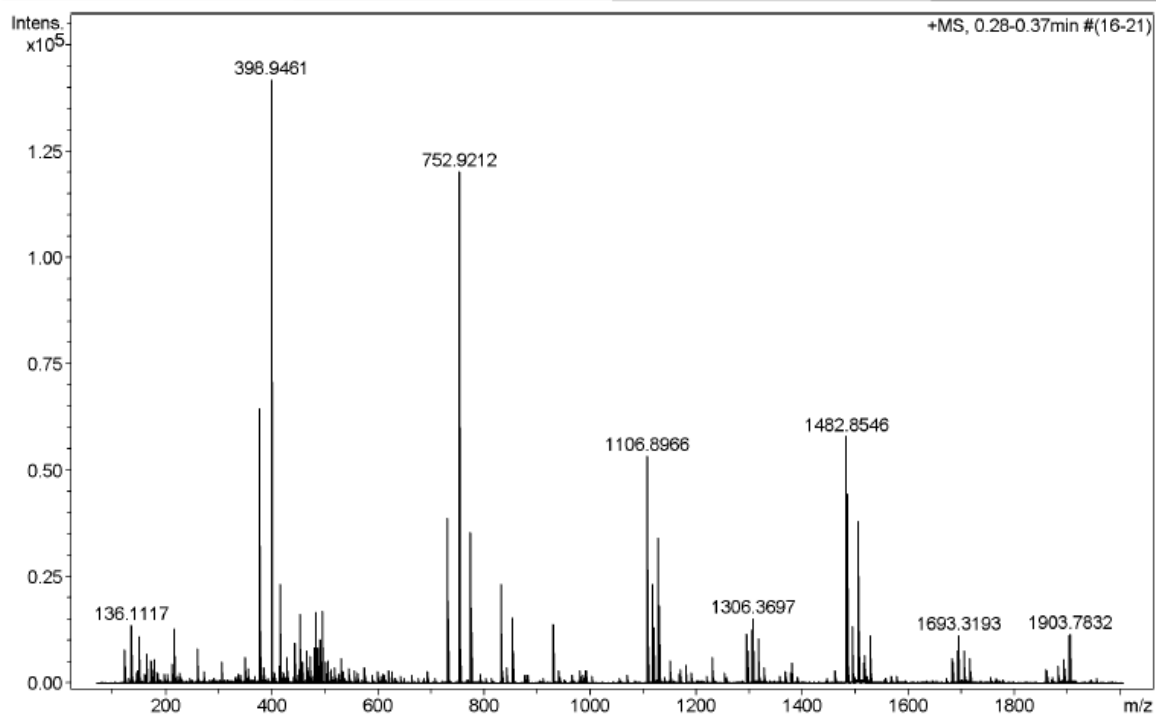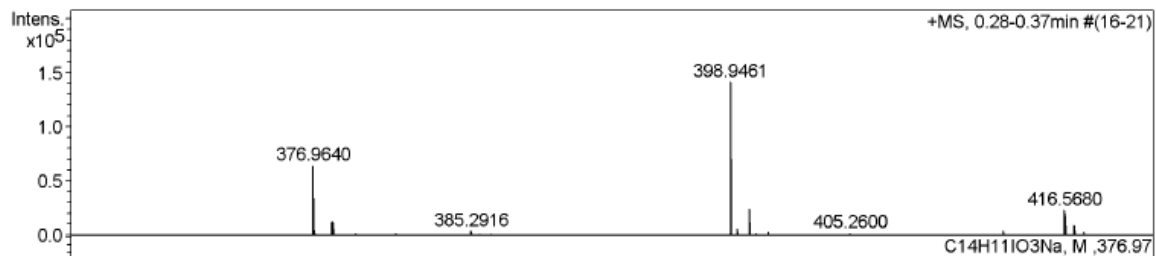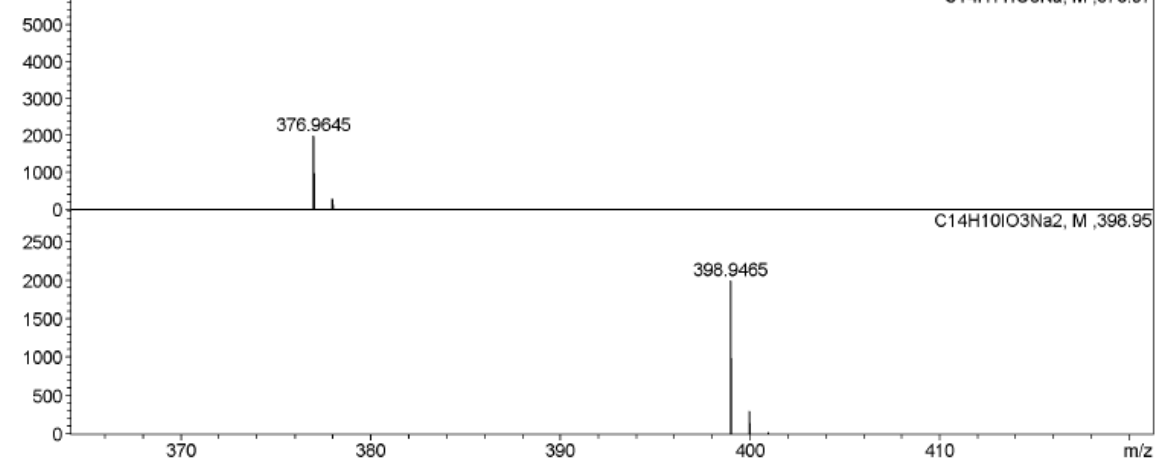

## High Resolution Mass Spectrometry Report

### Measured m/z vs. theoretical m/z

| Meas. m/z | # | Formula              | Score  | m/z      | err [mDa] | err [ppm] | mSigma | rdb  | e <sup>-</sup> Conf | z  |
|-----------|---|----------------------|--------|----------|-----------|-----------|--------|------|---------------------|----|
| 354.9818  | 1 | C 14 H 12 I O 3      | 100.00 | 354.9826 | 0.8       | 2.2       | 88.0   | 8.5  | even                | 1+ |
| 376.9640  | 1 | C 14 H 11 I Na O 3   | 100.00 | 376.9645 | 0.5       | 1.3       | 24.4   | 8.5  | even                |    |
| 398.9461  | 1 | C 14 H 10 I Na 2 O 3 | 100.00 | 398.9465 | 0.3       | 0.9       | 14.4   | 8.5  | even                |    |
| 730.9391  | 1 | C 28 H 22 I 2 Na O 6 | 100.00 | 730.9398 | 0.6       | 0.9       | 46.0   | 16.5 | even                |    |

### Mass list

| #  | m/z       | I%    | I      |
|----|-----------|-------|--------|
| 1  | 122.0961  | 5.7   | 8041   |
| 2  | 136.1117  | 9.7   | 13728  |
| 3  | 150.1276  | 7.9   | 11193  |
| 4  | 164.1432  | 4.9   | 6897   |
| 5  | 173.0782  | 3.9   | 5490   |
| 6  | 178.1586  | 4.0   | 5648   |
| 7  | 217.1043  | 9.1   | 12874  |
| 8  | 260.2002  | 4.9   | 6884   |
| 9  | 261.1303  | 5.8   | 8217   |
| 10 | 305.1562  | 3.7   | 5270   |
| 11 | 350.2657  | 4.3   | 6153   |
| 12 | 376.9640  | 45.6  | 64679  |
| 13 | 377.9675  | 8.8   | 12512  |
| 14 | 398.9461  | 100.0 | 141897 |
| 15 | 399.3068  | 4.6   | 6576   |
| 16 | 399.9494  | 17.6  | 25011  |
| 17 | 416.5680  | 16.4  | 23231  |
| 18 | 417.0696  | 6.7   | 9545   |
| 19 | 429.3178  | 4.3   | 6080   |
| 20 | 443.3334  | 6.7   | 9563   |
| 21 | 453.7845  | 11.5  | 16377  |
| 22 | 457.3487  | 3.6   | 5106   |
| 23 | 466.9330  | 5.5   | 7850   |
| 24 | 471.7949  | 4.6   | 6537   |
| 25 | 481.8163  | 6.0   | 8479   |
| 26 | 483.2581  | 11.8  | 16761  |
| 27 | 483.7592  | 7.3   | 10421  |
| 28 | 485.8106  | 3.6   | 5127   |
| 29 | 487.3596  | 6.0   | 8518   |
| 30 | 490.8165  | 7.2   | 10255  |
| 31 | 494.8110  | 12.1  | 17112  |
| 32 | 501.3753  | 3.7   | 5186   |
| 33 | 505.2399  | 3.8   | 5369   |
| 34 | 531.3851  | 4.1   | 5850   |
| 35 | 730.9391  | 27.5  | 38973  |
| 36 | 731.9429  | 10.8  | 15261  |
| 37 | 752.9212  | 84.8  | 120374 |
| 38 | 753.9246  | 30.4  | 43104  |
| 39 | 754.9274  | 5.9   | 8332   |
| 40 | 774.9027  | 25.0  | 35469  |
| 41 | 775.9063  | 8.5   | 12047  |
| 42 | 832.1286  | 16.4  | 23301  |
| 43 | 833.1318  | 6.5   | 9209   |
| 44 | 854.1109  | 10.9  | 15426  |
| 45 | 855.1132  | 5.0   | 7128   |
| 46 | 929.9089  | 9.8   | 13857  |
| 47 | 930.4104  | 8.3   | 11739  |
| 48 | 930.9127  | 4.1   | 5810   |
| 49 | 1106.8966 | 37.7  | 53534  |
| 50 | 1107.3990 | 6.5   | 9161   |
| 51 | 1107.9005 | 21.4  | 30418  |
| 52 | 1108.9030 | 6.2   | 8815   |
| 53 | 1117.8880 | 14.8  | 21018  |
| 54 | 1118.3903 | 16.5  | 23401  |
| 55 | 1118.8922 | 9.4   | 13311  |
| 56 | 1119.3945 | 3.7   | 5251   |
| 57 | 1128.8781 | 24.2  | 34295  |
| 58 | 1129.8818 | 12.9  | 18341  |
| 59 | 1130.8853 | 3.7   | 5295   |

## High Resolution Mass Spectrometry Report

| #   | m/z       | I %  | I     |
|-----|-----------|------|-------|
| 60  | 1150.8592 | 3.9  | 5489  |
| 61  | 1230.0665 | 4.4  | 6239  |
| 62  | 1294.8762 | 6.3  | 8953  |
| 63  | 1295.3784 | 7.7  | 10956 |
| 64  | 1295.8809 | 5.5  | 7842  |
| 65  | 1305.8664 | 9.0  | 12745 |
| 66  | 1306.3697 | 10.8 | 15386 |
| 67  | 1306.8708 | 7.3  | 10418 |
| 68  | 1316.8574 | 6.5  | 9290  |
| 69  | 1317.3606 | 7.4  | 10507 |
| 70  | 1317.8604 | 4.5  | 6359  |
| 71  | 1482.8546 | 41.0 | 58128 |
| 72  | 1483.3569 | 8.8  | 12486 |
| 73  | 1483.8578 | 31.5 | 44641 |
| 74  | 1484.8609 | 11.0 | 15586 |
| 75  | 1493.8464 | 6.3  | 8907  |
| 76  | 1494.3479 | 9.6  | 13552 |
| 77  | 1494.8498 | 7.3  | 10352 |
| 78  | 1495.3504 | 3.6  | 5115  |
| 79  | 1504.8370 | 26.8 | 38088 |
| 80  | 1505.3390 | 9.5  | 13463 |
| 81  | 1505.8400 | 20.5 | 29068 |
| 82  | 1506.8433 | 6.7  | 9501  |
| 83  | 1516.3293 | 4.8  | 6769  |
| 84  | 1526.8184 | 8.0  | 11344 |
| 85  | 1527.3218 | 4.4  | 6304  |
| 86  | 1527.8226 | 6.5  | 9271  |
| 87  | 1682.3297 | 4.3  | 6035  |
| 88  | 1682.8295 | 3.6  | 5171  |
| 89  | 1692.8174 | 5.4  | 7667  |
| 90  | 1693.3193 | 8.0  | 11398 |
| 91  | 1693.8201 | 6.5  | 9174  |
| 92  | 1704.3090 | 5.4  | 7638  |
| 93  | 1704.8118 | 4.9  | 6979  |
| 94  | 1715.3014 | 4.1  | 5874  |
| 95  | 1892.2917 | 4.0  | 5742  |
| 96  | 1892.7936 | 3.9  | 5472  |
| 97  | 1902.7785 | 5.8  | 8168  |
| 98  | 1903.2817 | 8.1  | 11436 |
| 99  | 1903.7832 | 8.3  | 11714 |
| 100 | 1904.2858 | 4.8  | 6843  |

### Acquisition Parameter

|                   |                              |                |                                       |                |              |           |
|-------------------|------------------------------|----------------|---------------------------------------|----------------|--------------|-----------|
| <b>General</b>    | Fore Vacuum                  | 3.38e+000 mBar | High Vacuum                           | 9.09e-008 mBar | Source Type  | ESI       |
|                   | Scan Begin                   | 75 m/z         | Scan End                              | 2000 m/z       | Ion Polarity | Positive  |
| <b>Source</b>     | Set Nebulizer                | 2.0 Bar        | Set Capillary                         | 4500 V         | Set Dry Gas  | 8.0 l/min |
|                   | Set Dry Heater               | 200 °C         | Set End Plate Offset                  | -500 V         |              |           |
| <b>Quadrupole</b> | Set Ion Energy ( MS only )   | 4.0 eV         |                                       |                | 100.0 Vpp    |           |
| <b>Coll. Cell</b> | Collision Energy             | 8.0 eV         | Set Collision Cell RF                 | 600.0 Vpp      |              |           |
| <b>Ion Cooler</b> | Set Ion Cooler Transfer Time | 75.0 µs        | Set Ion Cooler Pre Pulse Storage Time | 10.0 µs        |              |           |

# <sup>1</sup>H-NMR spectra of **2** in DMSO-d6

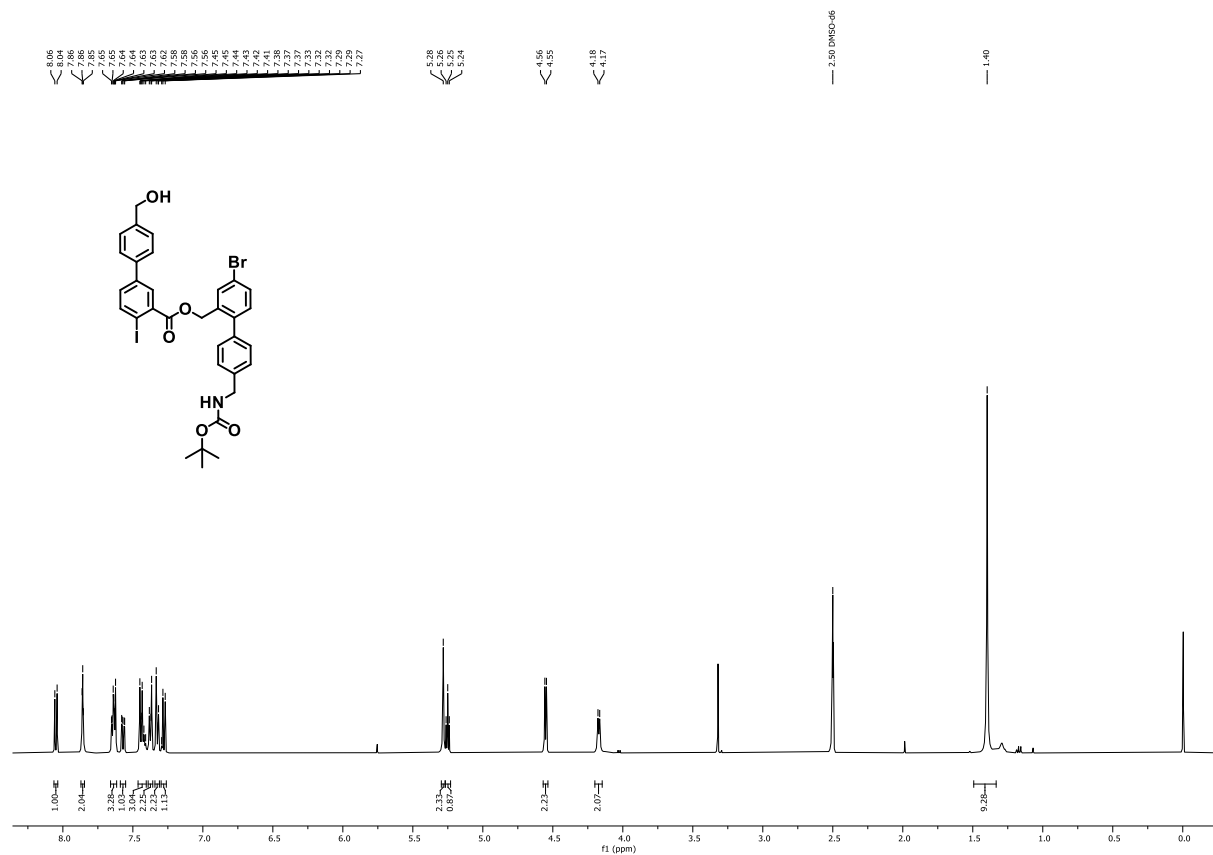

# <sup>13</sup>C-NMR spectra of **2** in DMSO-d6

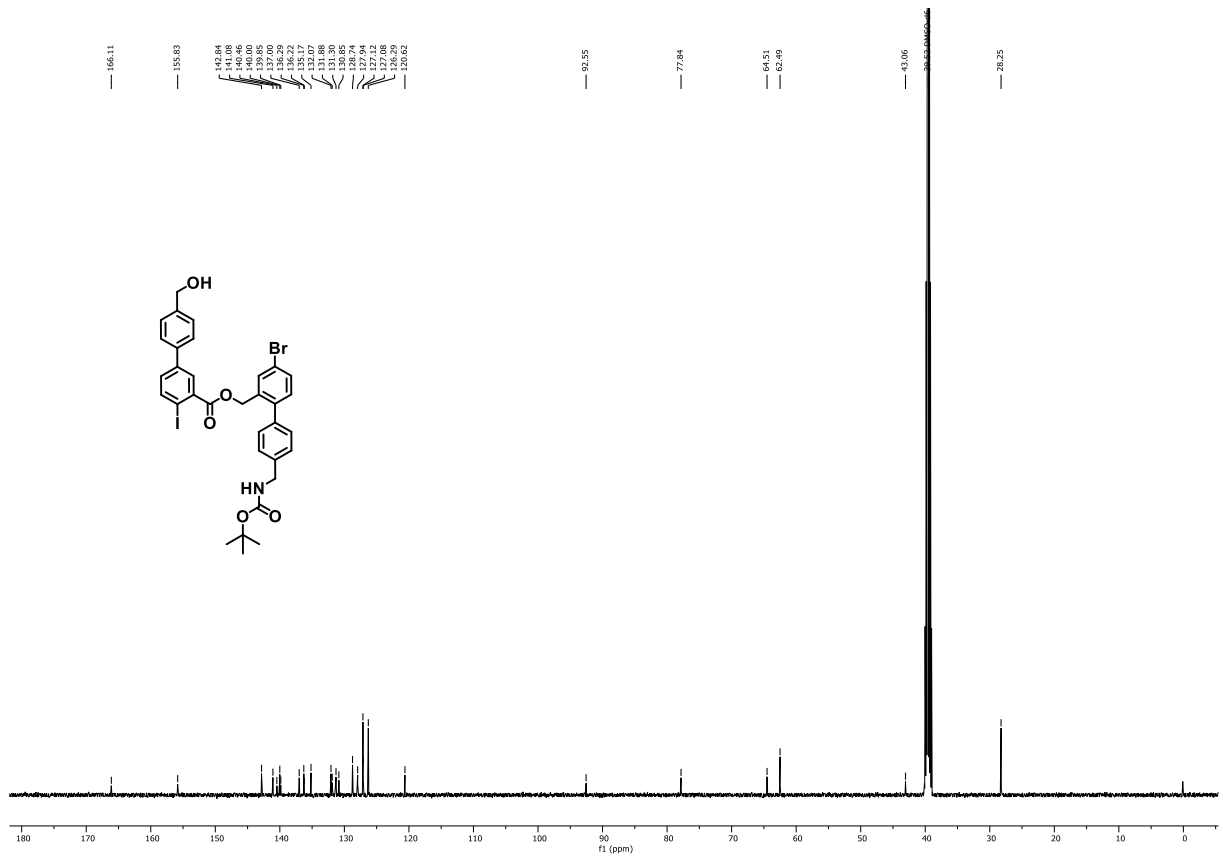



HR-ESI-MS spectra of 2

## High Resolution Mass Spectrometry Report

Sample Name **kro229**  
Comment

Instrument maXis 4G  
Method ms\_nocolumn\_higher\_pos.m

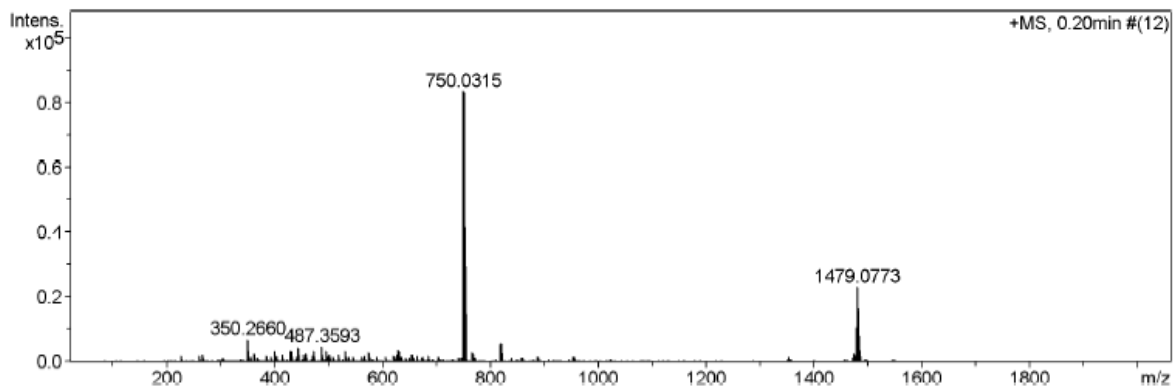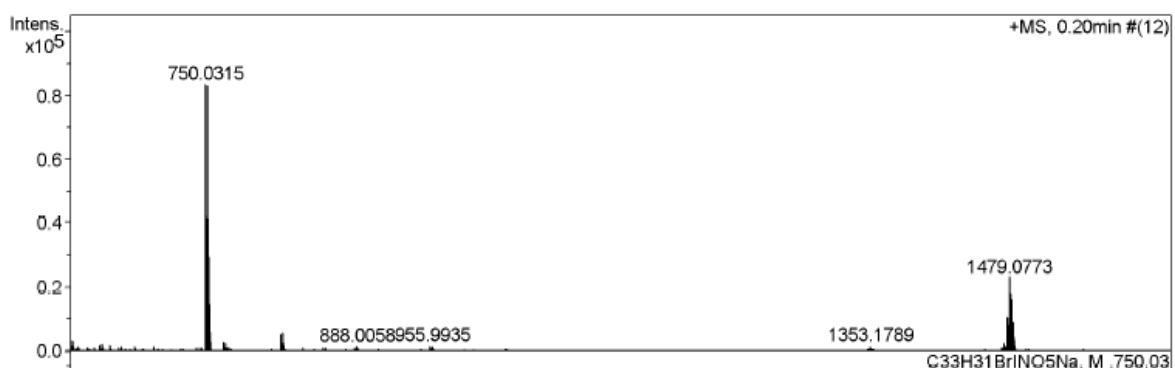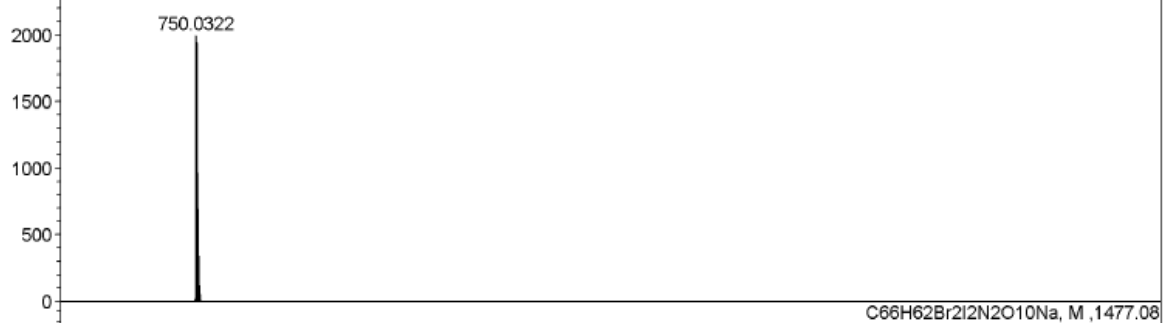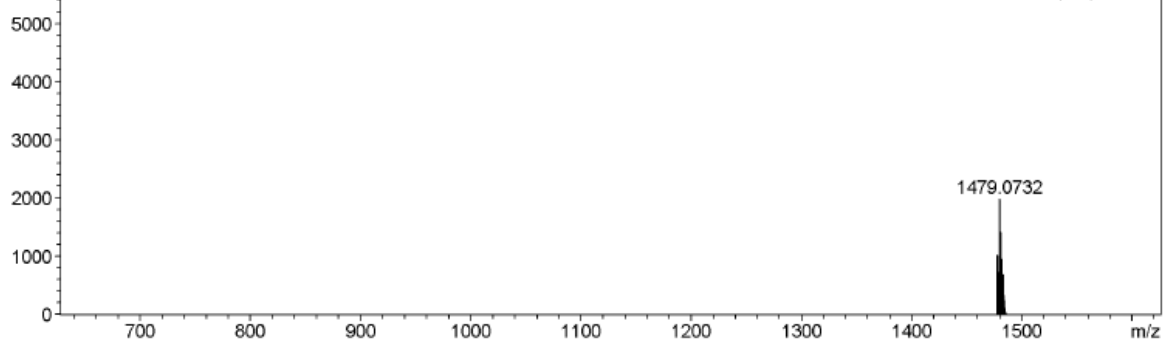

# High Resolution Mass Spectrometry Report

## Measured m/z vs. theoretical m/z

| Meas. m/z | # | Formula                        | Score  | m/z       | err [mDa] | err [ppm] | mSigma | rdb  | e <sup>-</sup> Conf | z  |
|-----------|---|--------------------------------|--------|-----------|-----------|-----------|--------|------|---------------------|----|
| 750.0315  | 1 | C 33 H 31 Br I N Na O 5        | 100.00 | 750.0322  | 0.8       | 1.0       | 19.1   | 17.5 | even                | 1+ |
| 1477.0767 | 1 | C 66 H 62 Br 2 I 2 N 2 Na O 10 | 100.00 | 1477.0753 | -1.4      | -1.0      | 43.5   | 34.5 | even                |    |

## Mass list

| #  | m/z      | I %   | I     |
|----|----------|-------|-------|
| 1  | 226.9530 | 2.3   | 1916  |
| 2  | 260.2010 | 2.1   | 1738  |
| 3  | 265.9628 | 2.6   | 2185  |
| 4  | 302.9827 | 1.4   | 1152  |
| 5  | 350.2660 | 8.1   | 6768  |
| 6  | 351.2691 | 1.8   | 1534  |
| 7  | 355.2814 | 1.7   | 1434  |
| 8  | 362.9263 | 3.0   | 2541  |
| 9  | 369.2976 | 1.5   | 1288  |
| 10 | 385.2916 | 2.1   | 1775  |
| 11 | 394.2549 | 1.6   | 1316  |
| 12 | 399.3078 | 4.0   | 3373  |
| 13 | 400.3100 | 1.3   | 1066  |
| 14 | 401.9362 | 1.8   | 1480  |
| 15 | 403.0970 | 2.1   | 1722  |
| 16 | 413.3232 | 2.4   | 2042  |
| 17 | 429.3181 | 3.8   | 3133  |
| 18 | 430.9133 | 4.0   | 3344  |
| 19 | 440.4069 | 1.5   | 1266  |
| 20 | 441.2963 | 1.8   | 1476  |
| 21 | 443.3334 | 5.1   | 4255  |
| 22 | 444.3364 | 1.7   | 1453  |
| 23 | 453.7854 | 2.8   | 2337  |
| 24 | 457.3487 | 2.9   | 2459  |
| 25 | 469.9243 | 2.3   | 1913  |
| 26 | 471.7945 | 1.4   | 1180  |
| 27 | 473.3437 | 3.9   | 3250  |
| 28 | 487.3593 | 5.3   | 4440  |
| 29 | 488.3627 | 1.6   | 1350  |
| 30 | 494.8114 | 4.1   | 3389  |
| 31 | 498.9003 | 2.3   | 1944  |
| 32 | 501.3753 | 2.5   | 2079  |
| 33 | 506.9440 | 1.9   | 1560  |
| 34 | 517.3693 | 2.4   | 1984  |
| 35 | 531.3863 | 4.1   | 3389  |
| 36 | 532.3874 | 1.5   | 1217  |
| 37 | 537.9118 | 1.6   | 1317  |
| 38 | 545.4023 | 1.9   | 1589  |
| 39 | 561.3968 | 1.9   | 1578  |
| 40 | 566.8877 | 2.4   | 1976  |
| 41 | 575.4114 | 3.3   | 2788  |
| 42 | 589.4266 | 1.8   | 1504  |
| 43 | 605.4232 | 1.8   | 1474  |
| 44 | 605.8986 | 1.6   | 1302  |
| 45 | 619.4368 | 2.4   | 1968  |
| 46 | 624.1345 | 1.8   | 1490  |
| 47 | 626.1321 | 2.4   | 2020  |
| 48 | 627.9959 | 4.3   | 3582  |
| 49 | 628.9994 | 1.5   | 1218  |
| 50 | 629.9944 | 4.0   | 3332  |
| 51 | 630.9969 | 1.5   | 1225  |
| 52 | 634.8750 | 2.0   | 1649  |
| 53 | 649.4481 | 1.3   | 1081  |
| 54 | 653.9763 | 2.4   | 2025  |
| 55 | 655.9732 | 2.6   | 2162  |
| 56 | 663.4641 | 2.4   | 1998  |
| 57 | 673.8861 | 1.6   | 1365  |
| 58 | 685.4342 | 2.0   | 1656  |
| 59 | 702.8634 | 1.9   | 1586  |
| 60 | 750.0315 | 100.0 | 83508 |
| 61 | 751.0346 | 34.8  | 29082 |

## High Resolution Mass Spectrometry Report

| #  | m/z       | I%   | I     |
|----|-----------|------|-------|
| 62 | 752.0299  | 99.8 | 83344 |
| 63 | 753.0321  | 35.5 | 29622 |
| 64 | 754.0347  | 6.9  | 5742  |
| 65 | 766.0040  | 3.3  | 2783  |
| 66 | 768.0018  | 2.9  | 2397  |
| 67 | 770.8502  | 1.5  | 1254  |
| 68 | 771.0920  | 1.3  | 1097  |
| 69 | 818.0196  | 6.4  | 5314  |
| 70 | 819.0225  | 2.8  | 2363  |
| 71 | 820.0167  | 6.8  | 5640  |
| 72 | 821.0199  | 2.3  | 1902  |
| 73 | 838.8378  | 1.3  | 1091  |
| 74 | 857.0284  | 1.3  | 1121  |
| 75 | 859.0293  | 1.4  | 1203  |
| 76 | 886.0041  | 1.6  | 1310  |
| 77 | 888.0058  | 1.8  | 1478  |
| 78 | 953.9937  | 1.6  | 1355  |
| 79 | 955.9935  | 1.9  | 1576  |
| 80 | 1353.1789 | 1.9  | 1608  |
| 81 | 1472.1222 | 1.3  | 1089  |
| 82 | 1473.1263 | 1.5  | 1285  |
| 83 | 1474.1198 | 2.9  | 2449  |
| 84 | 1475.1282 | 1.7  | 1429  |
| 85 | 1476.1216 | 2.0  | 1669  |
| 86 | 1477.0767 | 12.7 | 10623 |
| 87 | 1478.0812 | 10.0 | 8354  |
| 88 | 1479.0773 | 27.5 | 22983 |
| 89 | 1480.0808 | 21.8 | 18189 |
| 90 | 1481.0761 | 19.3 | 16140 |
| 91 | 1482.0788 | 11.1 | 9296  |
| 92 | 1483.0817 | 4.1  | 3436  |
| 93 | 1484.0827 | 1.4  | 1154  |

### Acquisition Parameter

|                   |                              |                |                                       |                |              |           |
|-------------------|------------------------------|----------------|---------------------------------------|----------------|--------------|-----------|
| <b>General</b>    | Fore Vacuum                  | 3.36e+000 mBar | High Vacuum                           | 9.15e-008 mBar | Source Type  | ESI       |
|                   | Scan Begin                   | 75 m/z         | Scan End                              | 2000 m/z       | Ion Polarity | Positive  |
| <b>Source</b>     | Set Nebulizer                | 2.0 Bar        | Set Capillary                         | 4500 V         | Set Dry Gas  | 8.0 l/min |
|                   | Set Dry Heater               | 200 °C         | Set End Plate Offset                  | -500 V         |              |           |
| <b>Quadrupole</b> | Set Ion Energy ( MS only )   | 4.0 eV         |                                       |                |              |           |
| <b>Coll. Cell</b> | Collision Energy             | 8.0 eV         | Set Collision Cell RF                 | 600.0 Vpp      | 100.0 Vpp    |           |
| <b>Ion Cooler</b> | Set Ion Cooler Transfer Time | 100.0 µs       | Set Ion Cooler Pre Pulse Storage Time | 18.0 µs        |              |           |

<sup>1</sup>H-NMR spectra of **9** in CD<sub>2</sub>Cl<sub>2</sub>

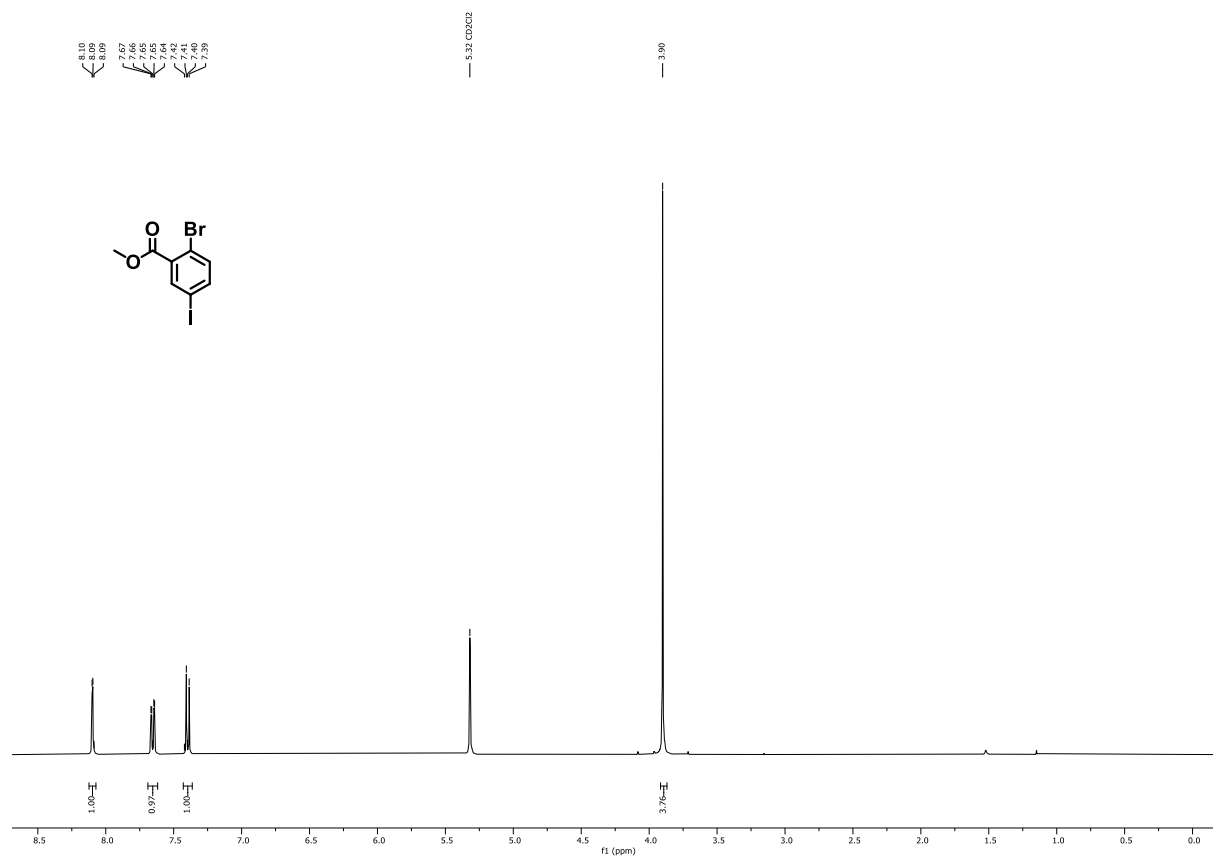

# <sup>1</sup>H-NMR spectra of **10** in CD<sub>2</sub>Cl<sub>2</sub>

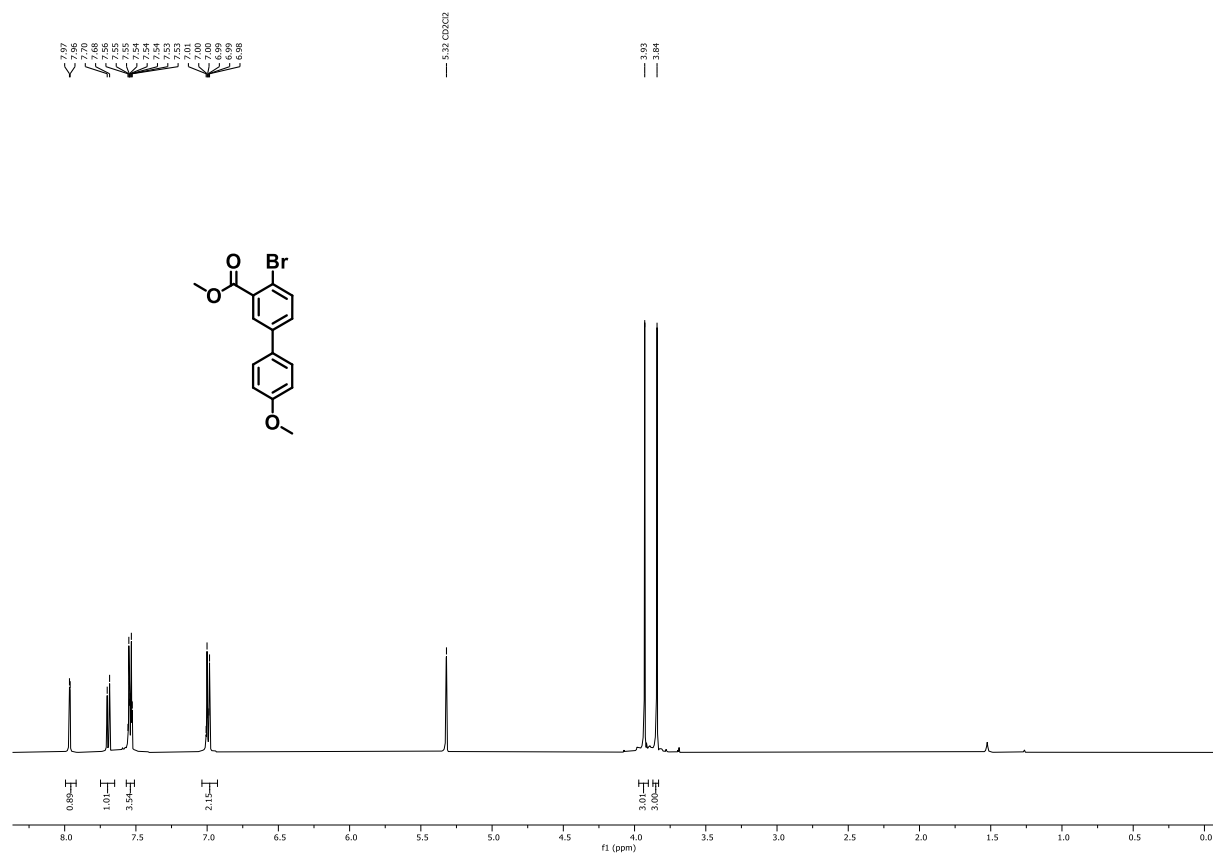

# <sup>13</sup>C-NMR spectra of **10** in CD<sub>2</sub>Cl<sub>2</sub>

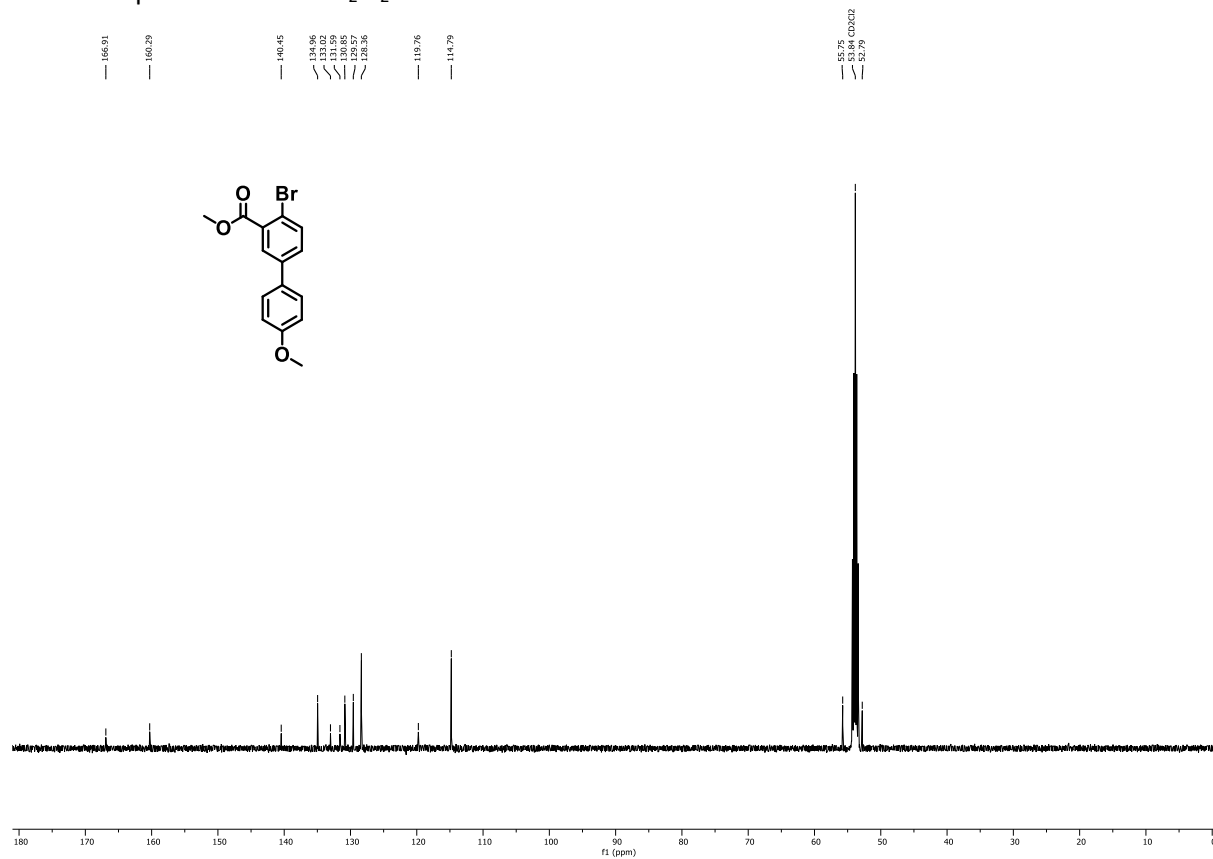

HR-ESI-MS spectra of 10

High Resolution Mass Spectrometry Report

Sample Name kro262  
Comment

Instrument maXis 4G  
Method 22 Direct\_pos\_mid.m

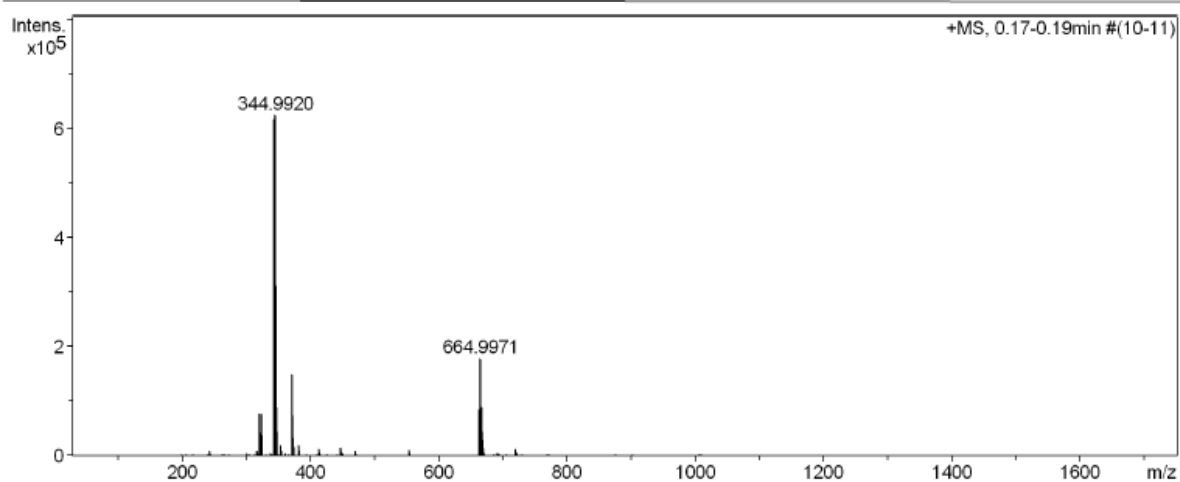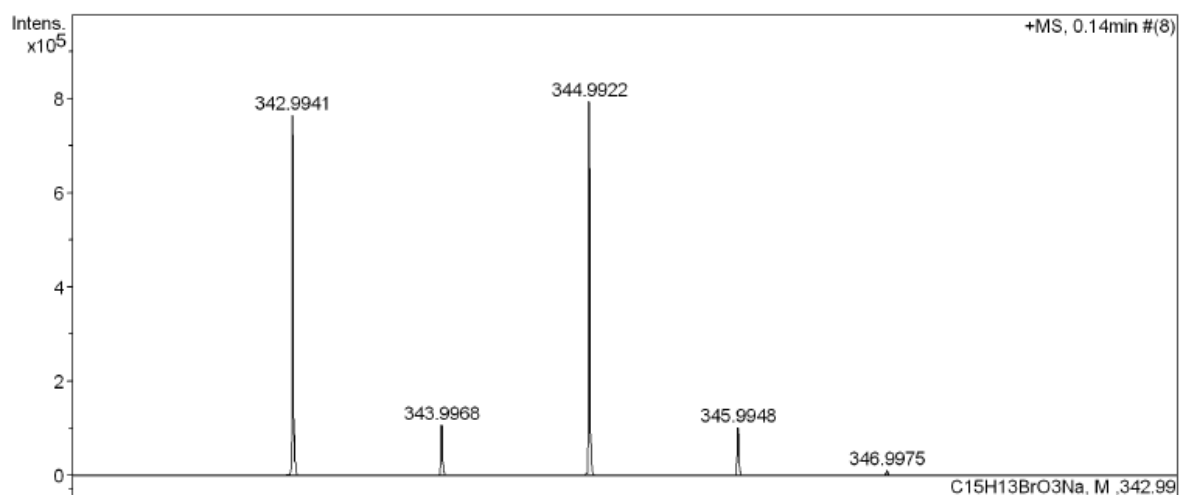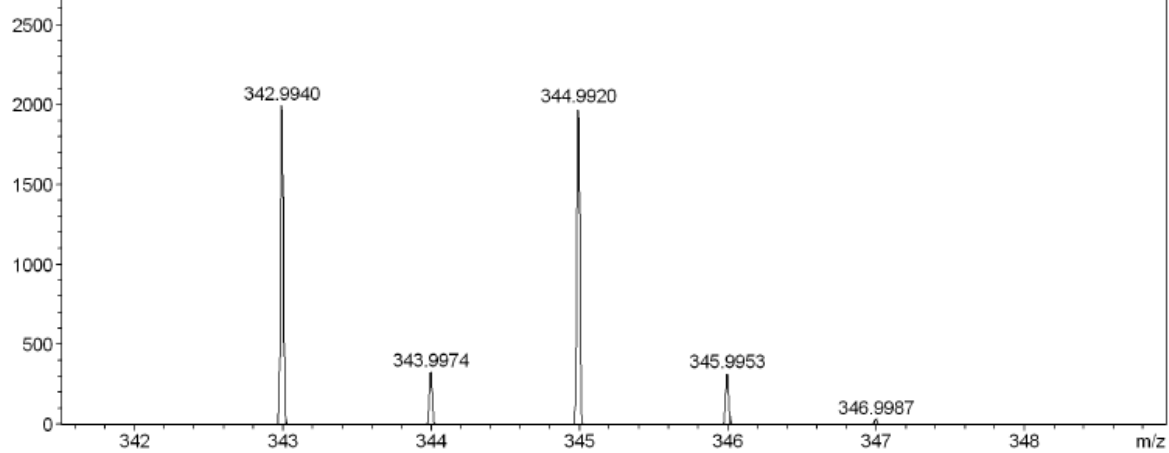

# High Resolution Mass Spectrometry Report

## Measured m/z vs. theoretical m/z

| Meas. m/z | # | Formula             | Score  | m/z      | err [mDa] | err [ppm] | mSigma | rdb | e <sup>-</sup> Conf | z  |
|-----------|---|---------------------|--------|----------|-----------|-----------|--------|-----|---------------------|----|
| 342.9941  | 1 | C 15 H 13 Br Na O 3 | 100.00 | 342.9940 | -0.1      | -0.2      | 23.8   | 8.5 | even                | 1+ |

## Mass list

| #  | m/z      | I %   | I      |
|----|----------|-------|--------|
| 1  | 173.0779 | 0.2   | 1826   |
| 2  | 198.1038 | 0.4   | 3253   |
| 3  | 205.0592 | 0.5   | 3622   |
| 4  | 217.1045 | 0.5   | 3789   |
| 5  | 239.0876 | 0.2   | 1938   |
| 6  | 241.0286 | 0.4   | 3382   |
| 7  | 242.0932 | 1.3   | 9956   |
| 8  | 243.0997 | 0.4   | 3178   |
| 9  | 257.0972 | 0.2   | 1833   |
| 10 | 261.1306 | 0.2   | 1989   |
| 11 | 261.9982 | 0.3   | 2220   |
| 12 | 263.9962 | 0.3   | 2069   |
| 13 | 265.0826 | 0.2   | 1790   |
| 14 | 273.1669 | 0.3   | 2756   |
| 15 | 301.1406 | 0.6   | 4461   |
| 16 | 304.2606 | 0.6   | 4714   |
| 17 | 313.2341 | 0.3   | 2168   |
| 18 | 317.1165 | 1.3   | 10185  |
| 19 | 318.1205 | 0.3   | 2544   |
| 20 | 321.0115 | 11.5  | 91809  |
| 21 | 322.0146 | 1.8   | 14242  |
| 22 | 323.0097 | 10.9  | 86932  |
| 23 | 324.0127 | 1.8   | 14214  |
| 24 | 325.0158 | 0.2   | 1848   |
| 25 | 331.2090 | 0.3   | 2224   |
| 26 | 337.1041 | 0.3   | 2069   |
| 27 | 338.0378 | 0.6   | 4501   |
| 28 | 340.0359 | 0.6   | 4629   |
| 29 | 341.1133 | 0.4   | 3068   |
| 30 | 342.9330 | 0.2   | 1874   |
| 31 | 342.9941 | 96.3  | 766136 |
| 32 | 343.9968 | 13.7  | 109365 |
| 33 | 344.9303 | 0.3   | 2185   |
| 34 | 344.9922 | 100.0 | 795616 |
| 35 | 345.9948 | 13.1  | 104504 |
| 36 | 346.9975 | 1.6   | 12684  |
| 37 | 349.1415 | 0.4   | 3201   |
| 38 | 353.2654 | 3.2   | 25465  |
| 39 | 354.2683 | 0.5   | 4317   |
| 40 | 360.3230 | 0.8   | 6316   |
| 41 | 361.3273 | 0.2   | 1901   |
| 42 | 365.1058 | 0.2   | 1882   |
| 43 | 371.1250 | 23.3  | 185302 |
| 44 | 372.1281 | 5.1   | 40657  |
| 45 | 373.1312 | 0.7   | 5596   |
| 46 | 381.2969 | 2.5   | 19501  |
| 47 | 382.2998 | 0.6   | 5142   |
| 48 | 393.2969 | 0.4   | 3465   |
| 49 | 394.2254 | 0.3   | 2120   |
| 50 | 409.0404 | 0.3   | 2278   |
| 51 | 410.9796 | 0.3   | 2077   |
| 52 | 412.9784 | 0.2   | 1937   |
| 53 | 413.2651 | 2.0   | 15980  |
| 54 | 414.2686 | 0.5   | 4282   |
| 55 | 421.3272 | 0.3   | 2046   |
| 56 | 425.2138 | 0.3   | 2460   |
| 57 | 441.2970 | 0.5   | 3973   |
| 58 | 447.3441 | 2.4   | 18792  |
| 59 | 448.3466 | 0.8   | 6228   |
| 60 | 449.0348 | 0.7   | 5254   |
| 61 | 449.3568 | 0.3   | 2720   |
| 62 | 451.0337 | 0.6   | 5097   |

## High Resolution Mass Spectrometry Report

| #   | m/z       | I%   | I      |
|-----|-----------|------|--------|
| 63  | 469.3283  | 1.4  | 11185  |
| 64  | 470.3318  | 0.4  | 2978   |
| 65  | 553.4582  | 1.8  | 14562  |
| 66  | 554.4622  | 0.7  | 5600   |
| 67  | 662.9991  | 12.9 | 103001 |
| 68  | 664.0022  | 4.1  | 32822  |
| 69  | 664.9972  | 28.1 | 223478 |
| 70  | 666.0003  | 9.0  | 71780  |
| 71  | 666.9957  | 13.8 | 109860 |
| 72  | 667.9981  | 4.5  | 36185  |
| 73  | 669.0013  | 1.0  | 7957   |
| 74  | 685.4347  | 0.4  | 2970   |
| 75  | 691.1299  | 0.8  | 6418   |
| 76  | 692.1320  | 0.3  | 2544   |
| 77  | 693.1284  | 0.8  | 6290   |
| 78  | 694.1304  | 0.4  | 3117   |
| 79  | 701.4003  | 0.3  | 2061   |
| 80  | 705.5819  | 0.4  | 3018   |
| 81  | 719.2607  | 2.0  | 15652  |
| 82  | 720.2633  | 1.0  | 7668   |
| 83  | 721.2647  | 0.3  | 2349   |
| 84  | 721.5770  | 1.2  | 9328   |
| 85  | 722.5803  | 0.6  | 4424   |
| 86  | 729.4326  | 0.3  | 2149   |
| 87  | 733.2712  | 0.2  | 1824   |
| 88  | 767.3494  | 0.4  | 3356   |
| 89  | 769.0399  | 0.2  | 1786   |
| 90  | 769.3469  | 0.4  | 2908   |
| 91  | 771.0389  | 0.3  | 2544   |
| 92  | 789.3318  | 0.3  | 2054   |
| 93  | 797.1714  | 0.2  | 1866   |
| 94  | 875.4643  | 0.3  | 2289   |
| 95  | 901.5956  | 0.3  | 2634   |
| 96  | 902.5994  | 0.2  | 1808   |
| 97  | 1005.4396 | 0.5  | 3601   |
| 98  | 1006.4427 | 0.3  | 2442   |
| 99  | 1007.4384 | 0.6  | 4450   |
| 100 | 1008.4399 | 0.3  | 2285   |

### Acquisition Parameter

|                   |                              |                |                                       |                |              |           |
|-------------------|------------------------------|----------------|---------------------------------------|----------------|--------------|-----------|
| <b>General</b>    | Fore Vacuum                  | 3.39e+000 mBar | High Vacuum                           | 8.71e-008 mBar | Source Type  | ESI       |
|                   | Scan Begin                   | 75 m/z         | Scan End                              | 1700 m/z       | Ion Polarity | Positive  |
| <b>Source</b>     | Set Nebulizer                | 0.4 Bar        | Set Capillary                         | 3600 V         | Set Dry Gas  | 4.0 l/min |
|                   | Set Dry Heater               | 180 °C         | Set End Plate Offset                  | -500 V         |              |           |
| <b>Quadrupole</b> | Set Ion Energy ( MS only )   | 4.0 eV         |                                       |                |              |           |
| <b>Coll. Cell</b> | Collision Energy             | 8.0 eV         | Set Collision Cell RF                 | 350.0 Vpp      |              | 100.0 Vpp |
| <b>Ion Cooler</b> | Set Ion Cooler Transfer Time | 75.0 µs        | Set Ion Cooler Pre Pulse Storage Time |                |              | 10.0 µs   |



<sup>1</sup>H-NMR spectra of **11** in CD<sub>2</sub>Cl<sub>2</sub>

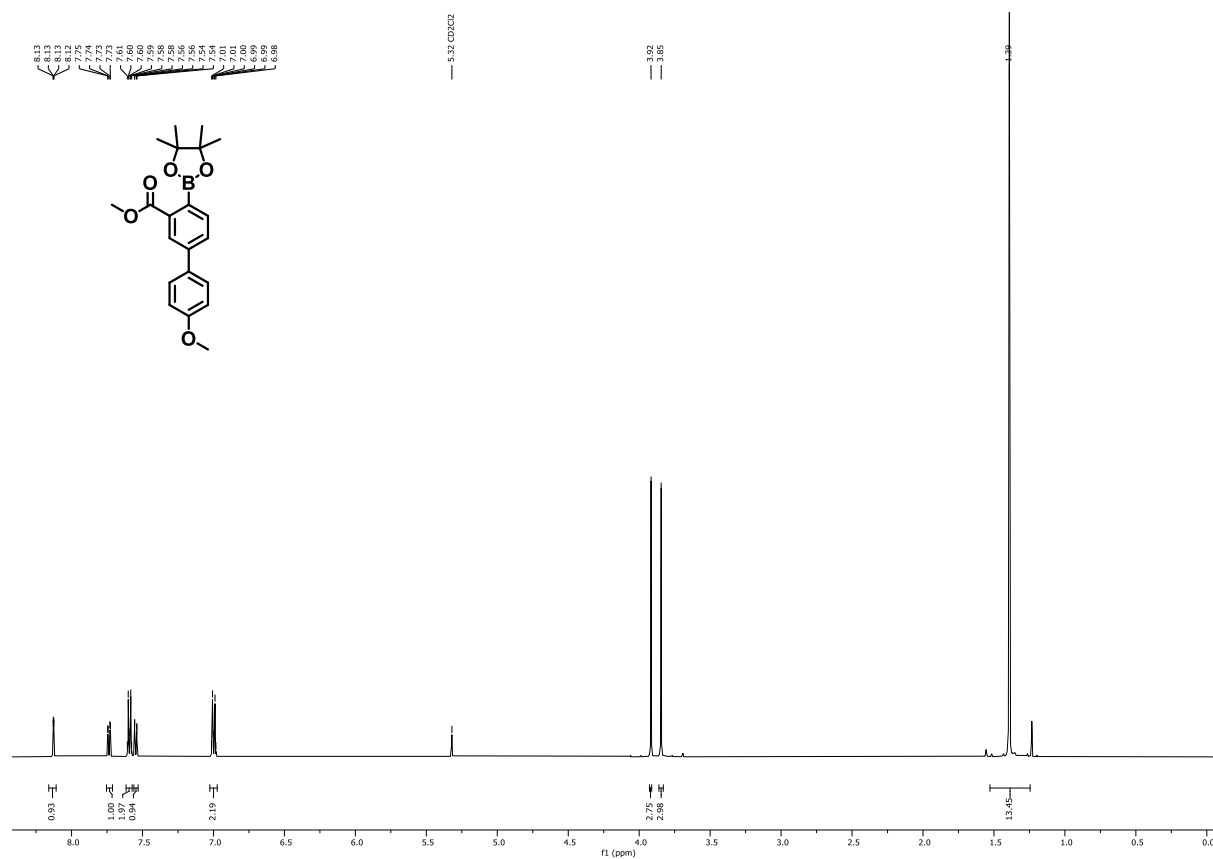

<sup>13</sup>C-NMR spectra of **11** in CD<sub>2</sub>Cl<sub>2</sub>

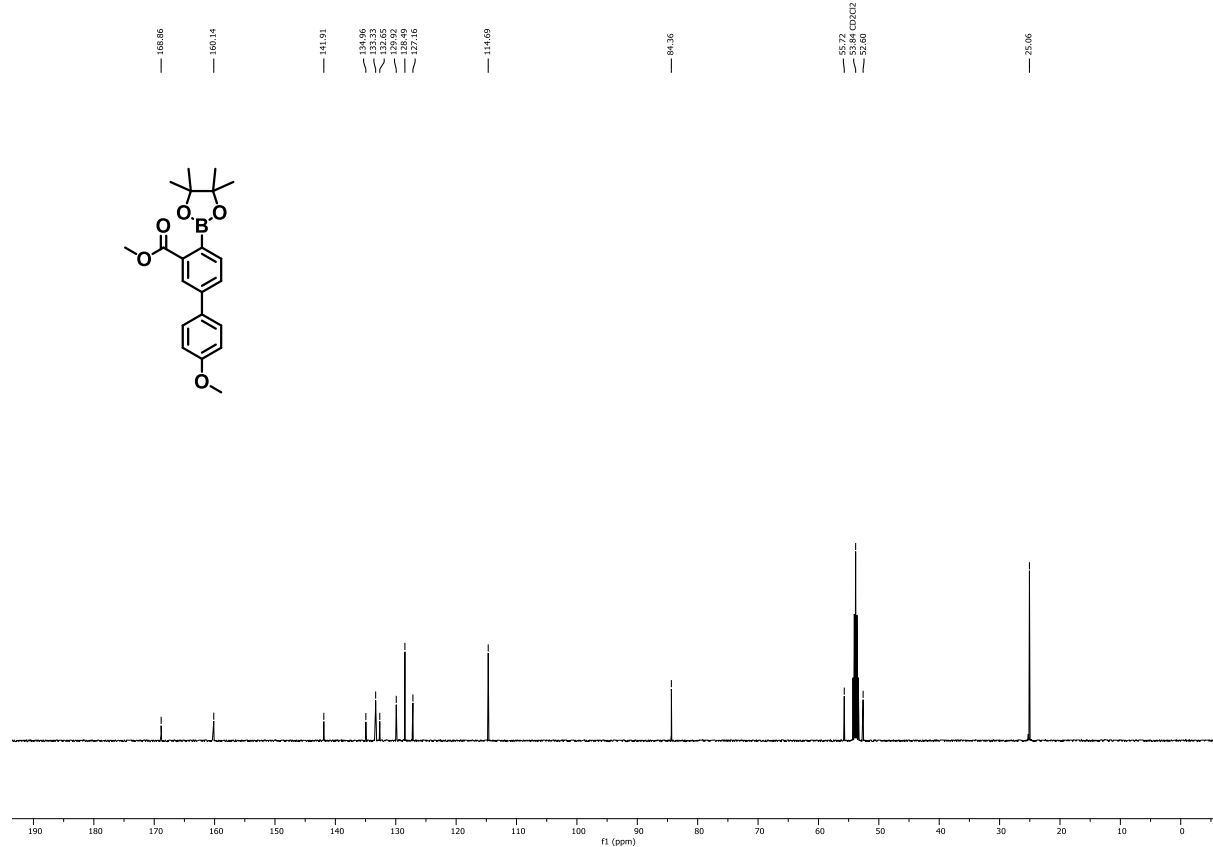

HR-ESI-MS spectra of 11

High Resolution Mass Spectrometry Report

Sample Name KRO-295  
Comment

Instrument maXis 4G  
Method ms\_nocolumn\_mid\_pos.m

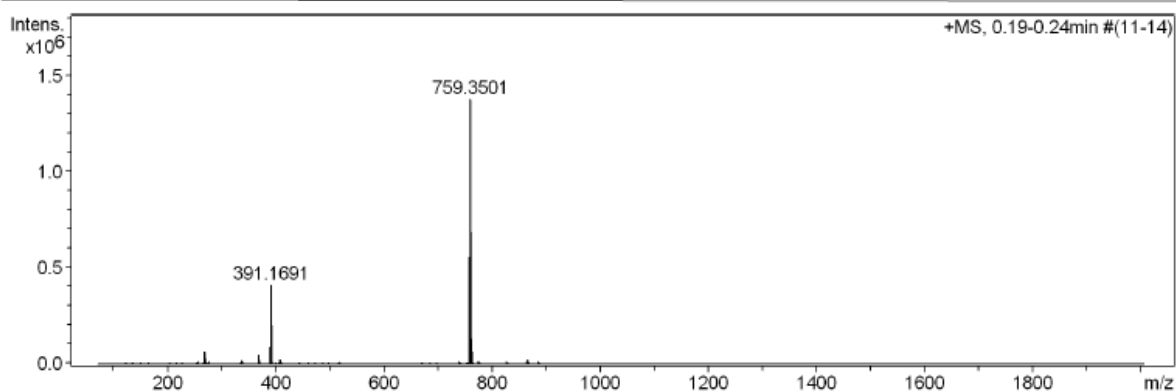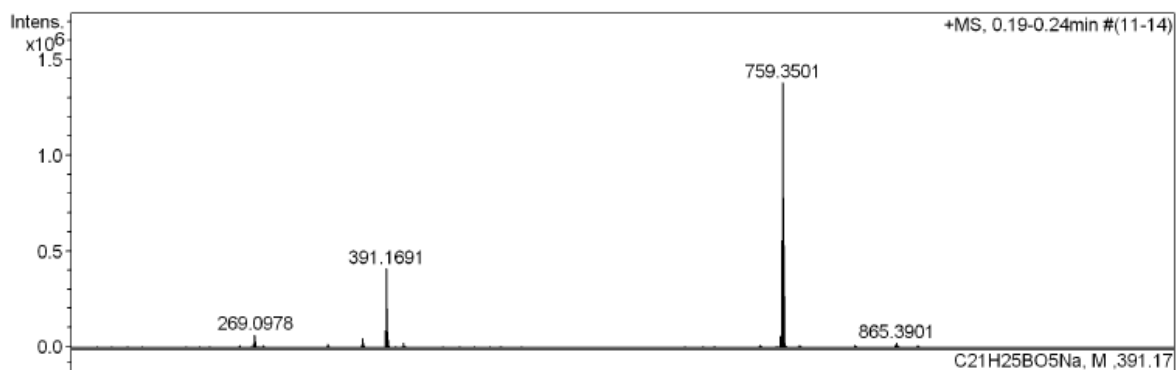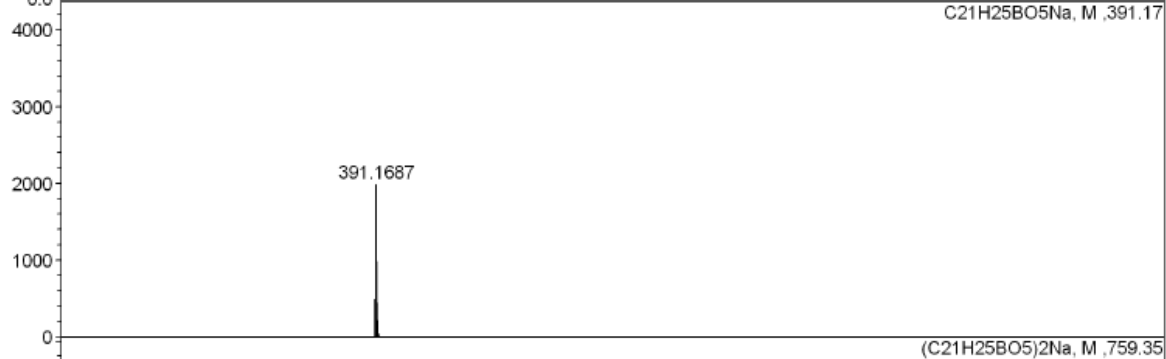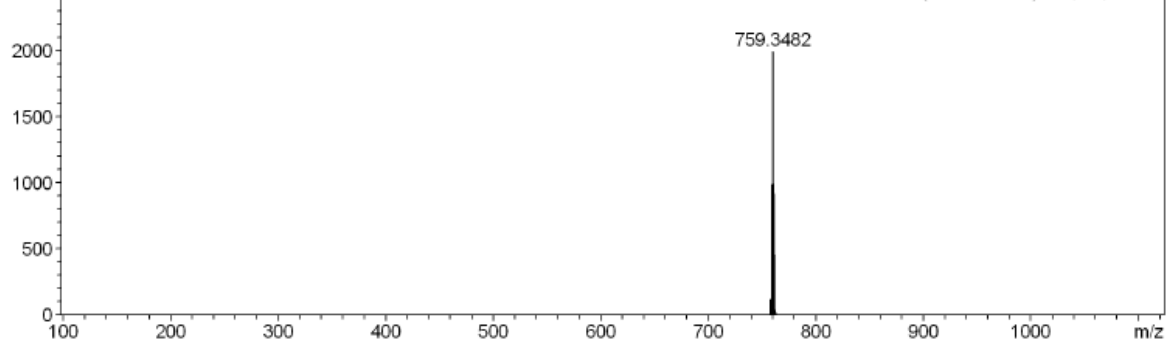

# High Resolution Mass Spectrometry Report

## Measured m/z vs. theoretical m/z

| Meas. m/z | # | Formula               | Score  | m/z      | err [mDa] | err [ppm] | mSigma | rdb  | e <sup>-</sup> Conf | z  |
|-----------|---|-----------------------|--------|----------|-----------|-----------|--------|------|---------------------|----|
| 369.1865  | 1 | C 21 H 26 B O 5       | 100.00 | 369.1872 | 0.3       | 0.7       | 6.9    | 9.5  | even                | 1+ |
| 391.1691  | 1 | C 21 H 25 B Na O 5    | 100.00 | 391.1691 | 0.0       | 0.1       | 15.7   | 9.5  | even                |    |
| 407.1423  | 1 | C 21 H 25 B K O 5     | 100.00 | 407.1430 | 0.3       | 0.8       | 15.8   | 9.5  | even                |    |
| 754.3927  | 1 | C 42 H 54 B 2 N O 10  | 100.00 | 754.3942 | 0.2       | 0.2       | 52.2   | 17.5 | even                |    |
| 759.3501  | 1 | C 42 H 50 B 2 Na O 10 | 100.00 | 759.3496 | -0.5      | -0.7      | 19.8   | 18.5 | even                |    |
| 775.3222  | 1 | C 42 H 50 B 2 K O 10  | 100.00 | 775.3235 | -0.0      | -0.1      | 29.0   | 18.5 | even                |    |

## Mass list

| #  | m/z      | I%   | I      |
|----|----------|------|--------|
| 1  | 122.0964 | 0.2  | 2434   |
| 2  | 136.1121 | 0.3  | 3836   |
| 3  | 150.1277 | 0.2  | 3127   |
| 4  | 164.1435 | 0.2  | 2436   |
| 5  | 178.1589 | 0.2  | 2242   |
| 6  | 205.0597 | 0.3  | 3848   |
| 7  | 212.1431 | 0.1  | 1947   |
| 8  | 217.1044 | 0.2  | 3192   |
| 9  | 226.9511 | 0.4  | 4949   |
| 10 | 254.0852 | 0.2  | 3130   |
| 11 | 255.0821 | 0.8  | 10898  |
| 12 | 265.9619 | 0.3  | 3464   |
| 13 | 268.1012 | 1.0  | 14444  |
| 14 | 269.0978 | 4.7  | 65202  |
| 15 | 270.1011 | 0.8  | 10504  |
| 16 | 273.1670 | 0.2  | 2558   |
| 17 | 276.1782 | 0.2  | 3347   |
| 18 | 277.1751 | 0.7  | 9079   |
| 19 | 336.1636 | 0.3  | 4255   |
| 20 | 337.1603 | 1.2  | 15942  |
| 21 | 338.1635 | 0.3  | 3562   |
| 22 | 368.1895 | 0.8  | 10535  |
| 23 | 369.1865 | 3.2  | 44268  |
| 24 | 370.1895 | 0.7  | 10204  |
| 25 | 371.1249 | 0.2  | 2118   |
| 26 | 371.1922 | 0.1  | 1986   |
| 27 | 390.1719 | 6.3  | 86897  |
| 28 | 391.1691 | 29.7 | 410862 |
| 29 | 392.1719 | 6.0  | 83451  |
| 30 | 393.1743 | 0.9  | 11861  |
| 31 | 399.3074 | 0.2  | 2315   |
| 32 | 406.1454 | 0.4  | 5322   |
| 33 | 407.1423 | 1.5  | 20616  |
| 34 | 408.1450 | 0.4  | 5300   |
| 35 | 409.1426 | 0.2  | 2386   |
| 36 | 429.3180 | 0.2  | 2096   |
| 37 | 443.3335 | 0.2  | 2749   |
| 38 | 459.1558 | 0.4  | 4892   |
| 39 | 473.3437 | 0.2  | 2399   |
| 40 | 487.3593 | 0.2  | 2531   |
| 41 | 497.2098 | 0.4  | 5353   |
| 42 | 498.1667 | 0.2  | 2782   |
| 43 | 516.2573 | 0.2  | 2085   |
| 44 | 517.2533 | 0.4  | 4839   |
| 45 | 531.3855 | 0.2  | 2179   |
| 46 | 669.2545 | 0.2  | 2454   |
| 47 | 685.4338 | 0.2  | 3352   |
| 48 | 696.3134 | 0.2  | 2350   |
| 49 | 697.3109 | 0.4  | 5643   |
| 50 | 698.3146 | 0.2  | 2252   |
| 51 | 738.3073 | 0.2  | 2388   |
| 52 | 739.3037 | 0.7  | 10205  |
| 53 | 740.3077 | 0.3  | 4301   |
| 54 | 753.3949 | 0.2  | 2875   |
| 55 | 754.3927 | 0.5  | 6984   |
| 56 | 755.3965 | 0.2  | 3151   |
| 57 | 757.3544 | 4.3  | 59575  |

## High Resolution Mass Spectrometry Report

| #   | m/z       | I %   | I       |
|-----|-----------|-------|---------|
| 58  | 758.3522  | 40.5  | 558910  |
| 59  | 758.8044  | 0.2   | 2106    |
| 60  | 759.0540  | 0.2   | 2311    |
| 61  | 759.0847  | 0.1   | 2069    |
| 62  | 759.1274  | 0.2   | 2431    |
| 63  | 759.1510  | 0.2   | 2315    |
| 64  | 759.2100  | 0.2   | 2978    |
| 65  | 759.3501  | 100.0 | 1381693 |
| 66  | 759.6651  | 0.2   | 2874    |
| 67  | 759.6836  | 0.2   | 2326    |
| 68  | 759.6985  | 0.2   | 2405    |
| 69  | 759.7034  | 0.2   | 2354    |
| 70  | 759.7442  | 0.2   | 2589    |
| 71  | 759.7951  | 0.2   | 2996    |
| 72  | 759.8715  | 0.1   | 2057    |
| 73  | 759.8933  | 0.2   | 2299    |
| 74  | 759.9172  | 0.2   | 2575    |
| 75  | 760.0383  | 0.2   | 2841    |
| 76  | 760.0625  | 0.2   | 2286    |
| 77  | 760.0841  | 0.1   | 2069    |
| 78  | 760.1218  | 0.1   | 2016    |
| 79  | 760.1591  | 0.2   | 2285    |
| 80  | 760.1936  | 0.1   | 2062    |
| 81  | 760.2451  | 0.1   | 1978    |
| 82  | 760.3524  | 38.6  | 533021  |
| 83  | 761.3546  | 9.5   | 131568  |
| 84  | 762.3567  | 1.7   | 23940   |
| 85  | 763.3591  | 0.3   | 4493    |
| 86  | 774.3256  | 0.4   | 5586    |
| 87  | 775.3222  | 0.9   | 13065   |
| 88  | 776.3253  | 0.4   | 5698    |
| 89  | 777.3240  | 0.2   | 2182    |
| 90  | 826.3374  | 0.3   | 4108    |
| 91  | 827.3352  | 0.7   | 9124    |
| 92  | 828.3383  | 0.3   | 4175    |
| 93  | 864.3923  | 0.7   | 9048    |
| 94  | 865.3901  | 1.6   | 22477   |
| 95  | 866.3921  | 0.8   | 10413   |
| 96  | 867.3953  | 0.2   | 3292    |
| 97  | 884.4358  | 0.4   | 5176    |
| 98  | 885.4336  | 0.6   | 8438    |
| 99  | 886.4372  | 0.3   | 3722    |
| 100 | 1053.6164 | 0.1   | 1950    |

### Acquisition Parameter

|                   |                              |                |                                       |                |              |           |
|-------------------|------------------------------|----------------|---------------------------------------|----------------|--------------|-----------|
| <b>General</b>    | Fore Vacuum                  | 3.08e+000 mBar | High Vacuum                           | 9.09e-008 mBar | Source Type  | ESI       |
|                   | Scan Begin                   | 75 m/z         | Scan End                              | 2000 m/z       | Ion Polarity | Positive  |
| <b>Source</b>     | Set Nebulizer                | 2.0 Bar        | Set Capillary                         | 4500 V         | Set Dry Gas  | 8.0 l/min |
|                   | Set Dry Heater               | 200 °C         | Set End Plate Offset                  | -500 V         |              |           |
| <b>Quadrupole</b> | Set Ion Energy ( MS only )   | 4.0 eV         |                                       |                |              |           |
| <b>Coll. Cell</b> | Collision Energy             | 8.0 eV         | Set Collision Cell RF                 | 600.0 Vpp      |              | 100.0 Vpp |
| <b>Ion Cooler</b> | Set Ion Cooler Transfer Time | 75.0 µs        | Set Ion Cooler Pre Pulse Storage Time |                |              | 10.0 µs   |

**<sup>1</sup>H-NMR spectra of 12 in DMSO-d6**

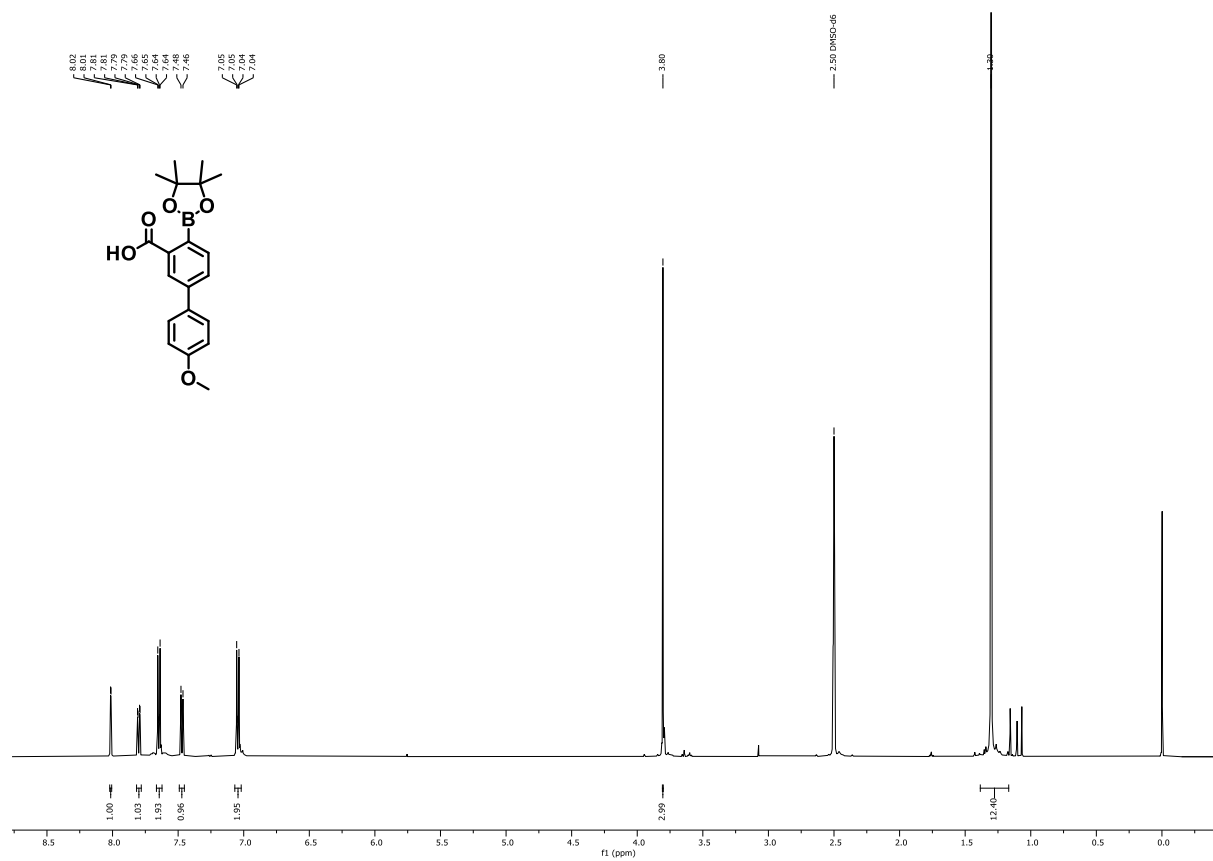

**<sup>13</sup>C-NMR spectra of 12 in DMSO-d6**

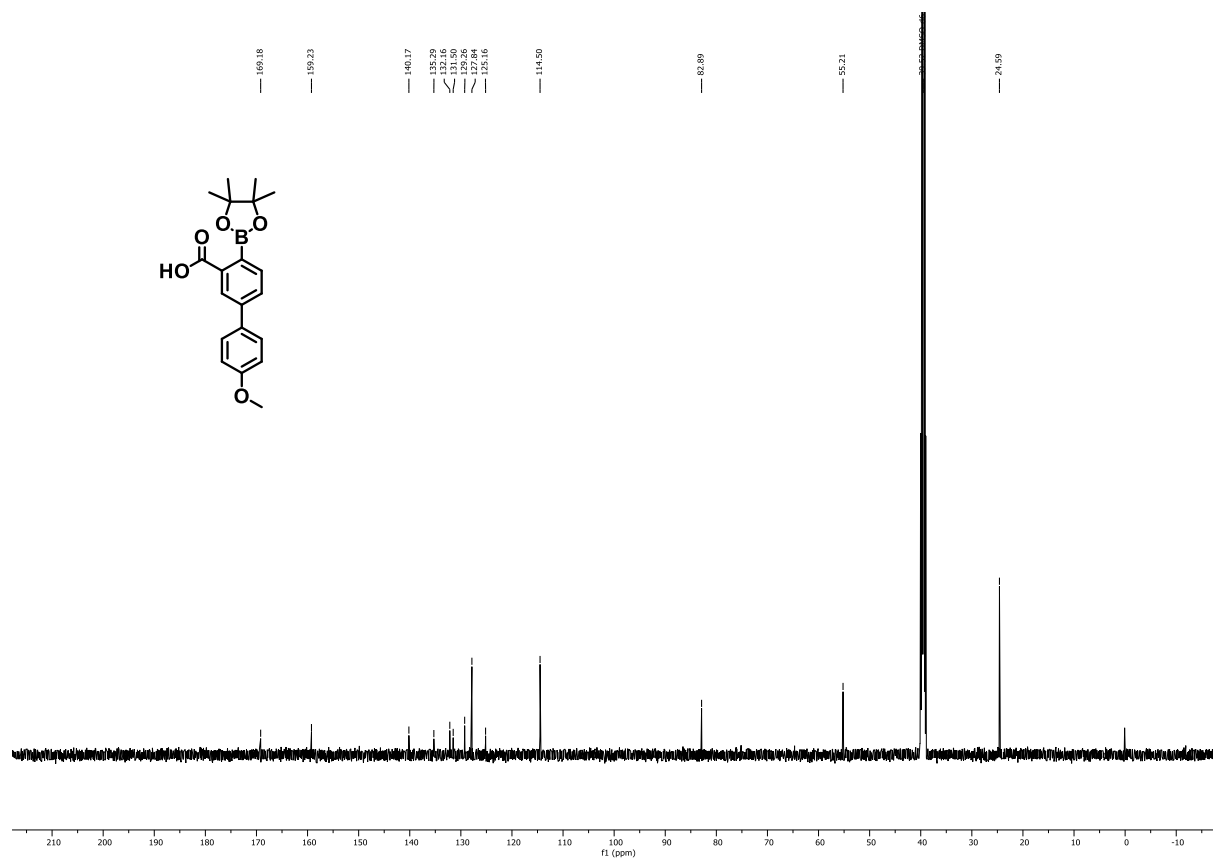

# HR-ESI-MS spectra of 12

## High Resolution Mass Spectrometry Report

Sample Name **kro-263**  
Comment

Instrument **maXis 4G**  
Method **22 Direct\_pos\_mid.m**

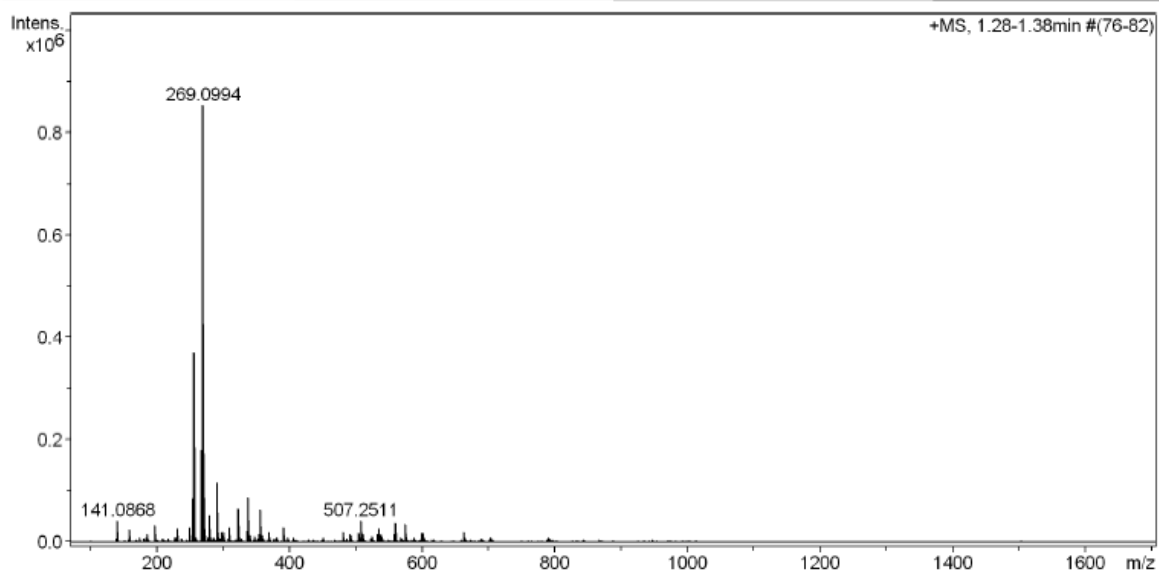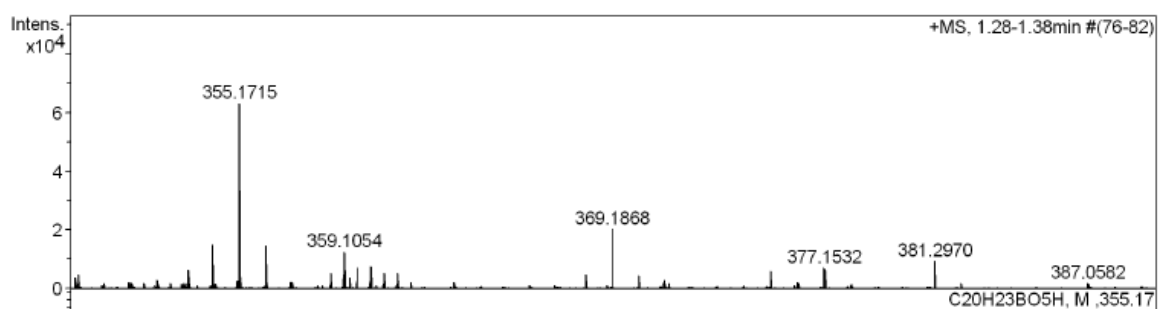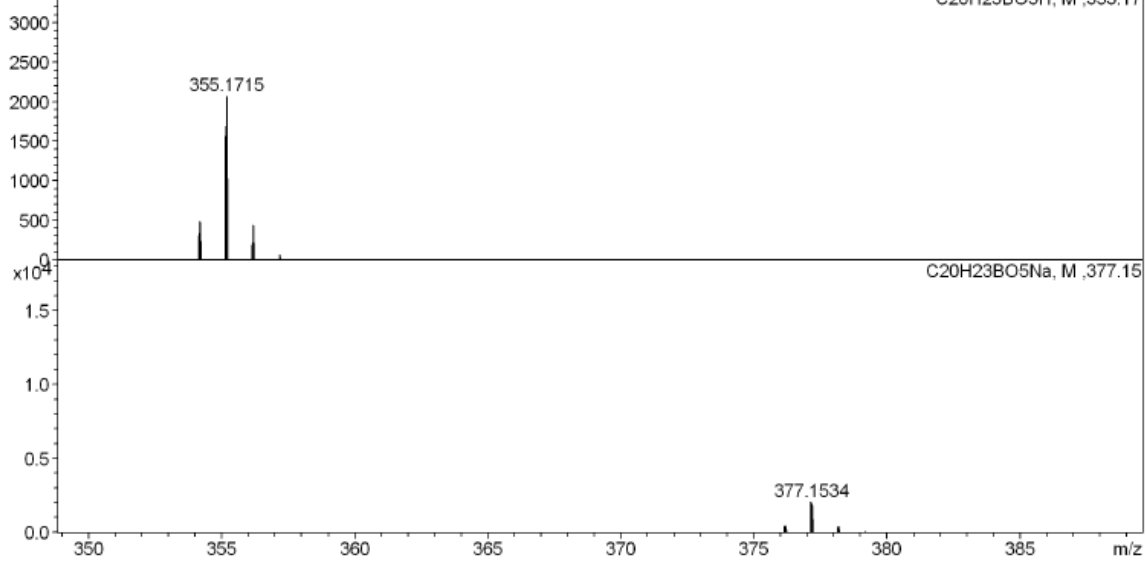

# High Resolution Mass Spectrometry Report

## Measured m/z vs. theoretical m/z

| Meas. m/z | # | Formula            | Score  | m/z      | err [mDa] | err [ppm] | mSigma | rdb | e <sup>-</sup> Conf | z  |
|-----------|---|--------------------|--------|----------|-----------|-----------|--------|-----|---------------------|----|
| 355.1715  | 1 | C 20 H 24 B O 5    | 100.00 | 355.1715 | -0.0      | -0.1      | 10.8   | 9.5 | even                | 1+ |
| 377.1532  | 1 | C 20 H 23 B Na O 5 | 100.00 | 377.1534 | -0.1      | -0.3      | 47.1   | 9.5 | even                |    |

## Mass list

| #  | m/z      | I%    | I      |
|----|----------|-------|--------|
| 1  | 141.0868 | 4.8   | 40780  |
| 2  | 159.1178 | 2.9   | 24578  |
| 3  | 173.1533 | 1.0   | 8337   |
| 4  | 183.0802 | 1.0   | 8311   |
| 5  | 185.0960 | 1.8   | 15122  |
| 6  | 197.0963 | 1.9   | 15900  |
| 7  | 197.1301 | 3.9   | 33196  |
| 8  | 209.1139 | 0.9   | 7386   |
| 9  | 227.1260 | 1.0   | 8340   |
| 10 | 229.1037 | 1.0   | 8432   |
| 11 | 231.0998 | 3.0   | 25914  |
| 12 | 237.2065 | 0.9   | 7901   |
| 13 | 249.2067 | 3.4   | 28958  |
| 14 | 254.0867 | 10.1  | 85948  |
| 15 | 255.0836 | 43.5  | 371304 |
| 16 | 256.0865 | 6.2   | 52673  |
| 17 | 259.1886 | 1.1   | 9738   |
| 18 | 267.0942 | 0.9   | 7783   |
| 19 | 268.1025 | 21.2  | 181346 |
| 20 | 269.0994 | 100.0 | 853438 |
| 21 | 270.1024 | 14.0  | 119856 |
| 22 | 271.1044 | 1.7   | 14105  |
| 23 | 271.1888 | 20.3  | 173051 |
| 24 | 272.1263 | 2.0   | 17297  |
| 25 | 272.1921 | 3.1   | 26051  |
| 26 | 277.0649 | 1.1   | 9644   |
| 27 | 279.0939 | 6.3   | 53385  |
| 28 | 280.0972 | 1.3   | 10826  |
| 29 | 281.1729 | 0.9   | 7255   |
| 30 | 286.1251 | 1.2   | 10058  |
| 31 | 290.0842 | 3.2   | 27721  |
| 32 | 291.0808 | 13.8  | 117947 |
| 33 | 292.0839 | 2.2   | 19197  |
| 34 | 295.0755 | 1.0   | 8188   |
| 35 | 297.1299 | 2.3   | 19352  |
| 36 | 299.1201 | 1.6   | 13483  |
| 37 | 301.1172 | 0.9   | 8065   |
| 38 | 301.1416 | 2.3   | 19254  |
| 39 | 308.0942 | 0.9   | 7400   |
| 40 | 309.0911 | 3.4   | 29293  |
| 41 | 309.1299 | 2.1   | 18017  |
| 42 | 322.1101 | 1.7   | 14904  |
| 43 | 323.1067 | 7.7   | 65687  |
| 44 | 324.1099 | 1.4   | 11900  |
| 45 | 327.1403 | 0.9   | 7818   |
| 46 | 336.1646 | 2.6   | 22106  |
| 47 | 337.1612 | 10.2  | 87024  |
| 48 | 338.1643 | 2.2   | 18969  |
| 49 | 341.2300 | 1.5   | 12951  |
| 50 | 347.1221 | 1.3   | 11484  |
| 51 | 354.1748 | 1.8   | 15106  |
| 52 | 355.1715 | 7.4   | 63248  |
| 53 | 356.1748 | 1.7   | 14702  |
| 54 | 359.1054 | 1.5   | 12722  |
| 55 | 359.6057 | 0.8   | 7226   |
| 56 | 360.1042 | 0.9   | 7547   |
| 57 | 369.1868 | 2.4   | 20371  |
| 58 | 377.1532 | 0.8   | 7192   |
| 59 | 381.2970 | 1.1   | 9404   |
| 60 | 391.1686 | 3.4   | 28725  |
| 61 | 392.1713 | 0.9   | 7323   |

## High Resolution Mass Spectrometry Report

| #   | m/z      | I%  | I     |
|-----|----------|-----|-------|
| 62  | 397.1214 | 1.0 | 8291  |
| 63  | 406.1709 | 1.1 | 9371  |
| 64  | 451.1530 | 1.1 | 9324  |
| 65  | 480.6670 | 1.4 | 11780 |
| 66  | 481.1662 | 2.3 | 19411 |
| 67  | 481.6672 | 1.2 | 10192 |
| 68  | 491.3786 | 1.9 | 16092 |
| 69  | 493.3577 | 1.6 | 13446 |
| 70  | 505.1605 | 2.1 | 18161 |
| 71  | 506.2543 | 1.1 | 9581  |
| 72  | 507.2511 | 4.8 | 40803 |
| 73  | 508.2542 | 1.4 | 11975 |
| 74  | 511.2158 | 1.8 | 15217 |
| 75  | 525.0811 | 1.4 | 12050 |
| 76  | 533.1776 | 1.9 | 16595 |
| 77  | 534.1832 | 1.4 | 12170 |
| 78  | 535.1827 | 3.1 | 26237 |
| 79  | 536.1855 | 1.4 | 11619 |
| 80  | 537.1807 | 2.0 | 16778 |
| 81  | 538.1824 | 1.1 | 9617  |
| 82  | 539.1787 | 1.3 | 10730 |
| 83  | 558.1721 | 1.9 | 16554 |
| 84  | 559.1691 | 4.4 | 37632 |
| 85  | 560.1720 | 1.5 | 12561 |
| 86  | 567.2082 | 1.2 | 10364 |
| 87  | 574.2713 | 1.0 | 8561  |
| 88  | 575.2681 | 4.1 | 35415 |
| 89  | 576.2717 | 1.3 | 11280 |
| 90  | 587.0965 | 1.2 | 10310 |
| 91  | 599.2343 | 2.1 | 17803 |
| 92  | 600.2368 | 0.9 | 7526  |
| 93  | 601.1122 | 2.1 | 18336 |
| 94  | 601.2319 | 1.1 | 9373  |
| 95  | 602.1152 | 0.9 | 7914  |
| 96  | 602.9577 | 1.0 | 8859  |
| 97  | 663.4512 | 2.3 | 19669 |
| 98  | 664.4545 | 1.1 | 9088  |
| 99  | 703.1844 | 1.0 | 8436  |
| 100 | 789.2583 | 1.1 | 9461  |

### Acquisition Parameter

|                   |                              |                |                                       |                |              |           |
|-------------------|------------------------------|----------------|---------------------------------------|----------------|--------------|-----------|
| <b>General</b>    | Fore Vacuum                  | 3.46e+000 mBar | High Vacuum                           | 8.93e-008 mBar | Source Type  | ESI       |
|                   | Scan Begin                   | 75 m/z         | Scan End                              | 1700 m/z       | Ion Polarity | Positive  |
| <b>Source</b>     | Set Nebulizer                | 0.4 Bar        | Set Capillary                         | 3600 V         | Set Dry Gas  | 4.0 l/min |
|                   | Set Dry Heater               | 180 °C         | Set End Plate Offset                  | -500 V         |              |           |
| <b>Quadrupole</b> | Set Ion Energy ( MS only )   | 4.0 eV         |                                       |                |              |           |
| <b>Coll. Cell</b> | Collision Energy             | 8.0 eV         | Set Collision Cell RF                 | 350.0 Vpp      |              | 100.0 Vpp |
| <b>Ion Cooler</b> | Set Ion Cooler Transfer Time | 75.0 µs        | Set Ion Cooler Pre Pulse Storage Time |                |              | 10.0 µs   |



### <sup>1</sup>H-NMR spectra of **14** in CD<sub>2</sub>Cl<sub>2</sub>

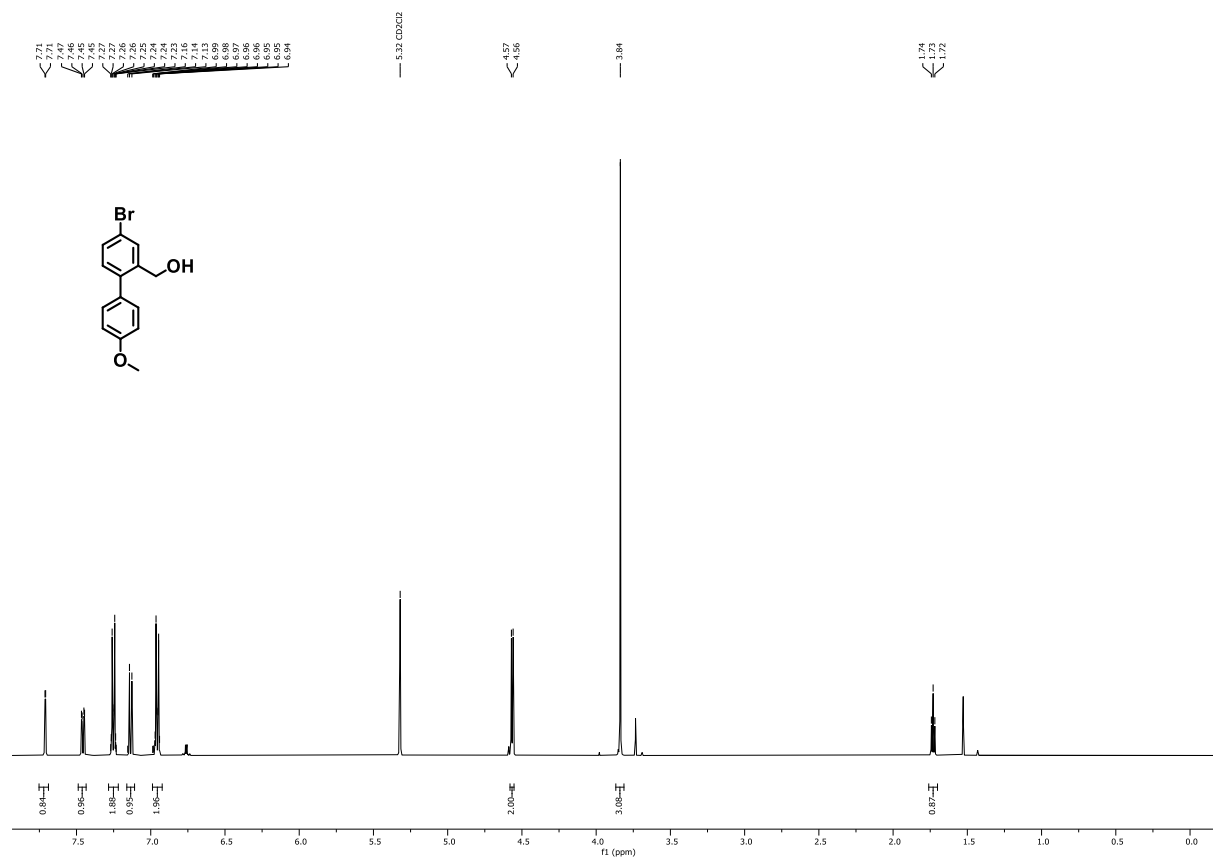

### <sup>13</sup>C-NMR spectra of **14** in CD<sub>2</sub>Cl<sub>2</sub>

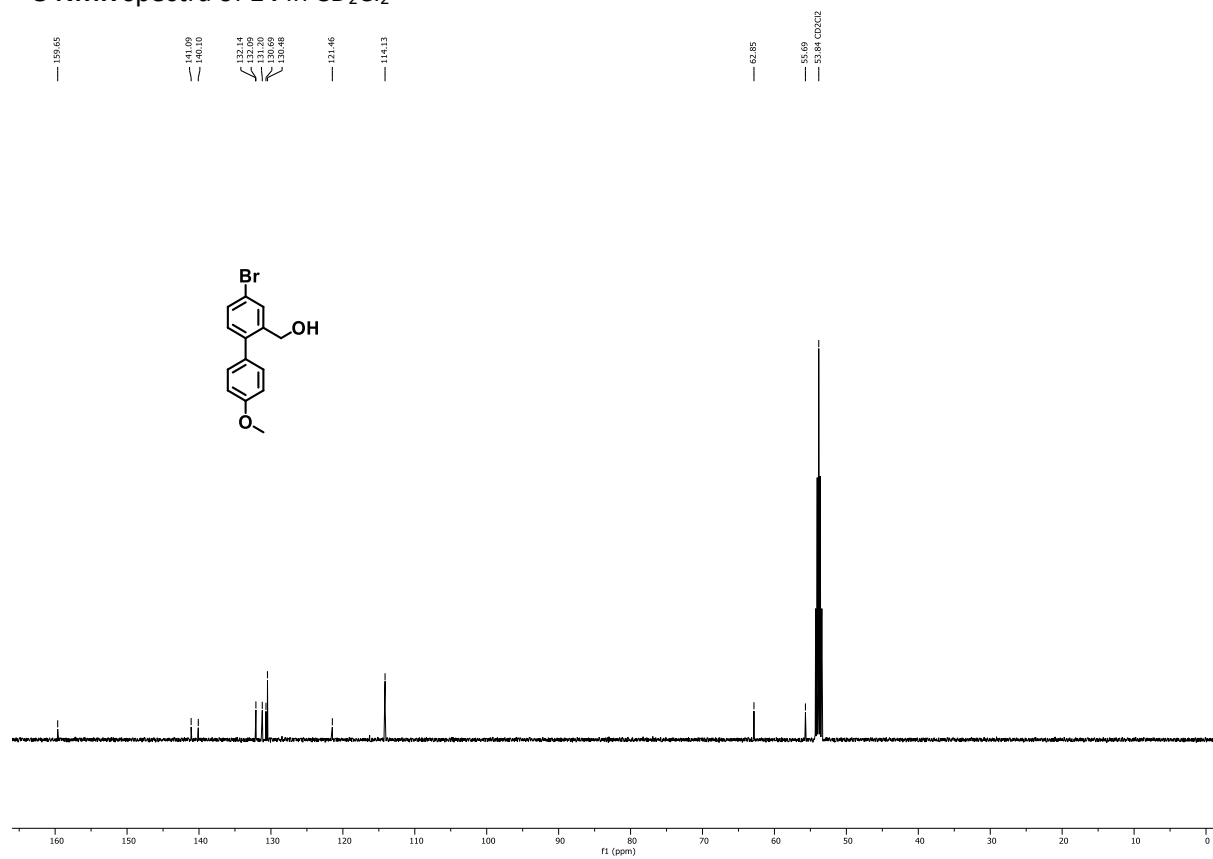

# HR-MS spectra of 14

## High Resolution Mass Spectrometry Report

Sample Name **KRO217**  
Comment

Instrument **maXis 4G**  
Method **ms\_nocolumn\_mid\_pos.m**

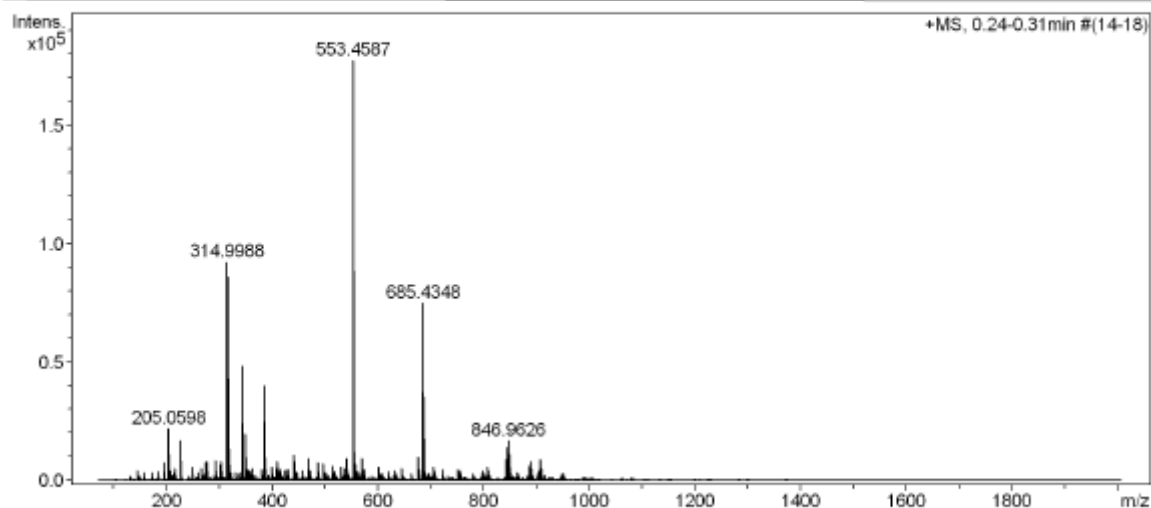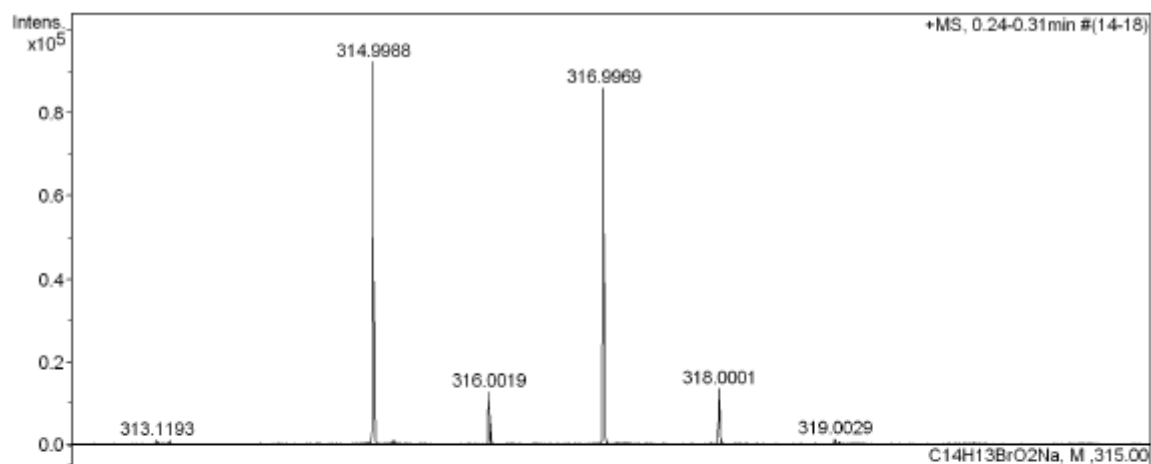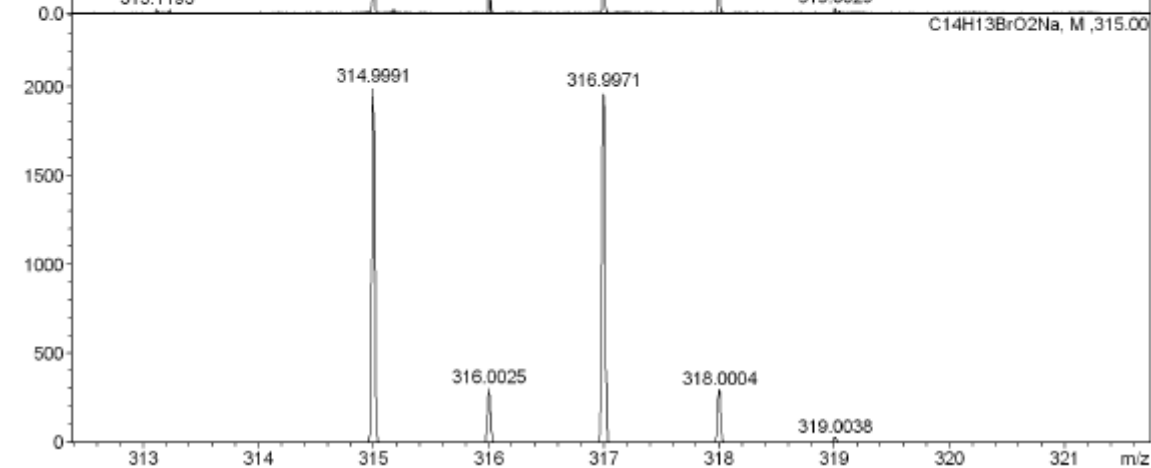

## High Resolution Mass Spectrometry Report

### Measured m/z vs. theoretical m/z

| Meas. m/z | # | Formula             | Score  | m/z      | err [mDa] | err [ppm] | mSigma | rdb | e <sup>-</sup> Conf | z  |
|-----------|---|---------------------|--------|----------|-----------|-----------|--------|-----|---------------------|----|
| 314.9988  | 1 | C 14 H 13 Br Na O 2 | 100.00 | 314.9991 | 0.3       | 0.9       | 24.7   | 7.5 | even                | 1+ |

### Mass list

| #  | m/z      | I %   | I      |
|----|----------|-------|--------|
| 1  | 144.9820 | 2.5   | 4397   |
| 2  | 185.1145 | 2.3   | 4105   |
| 3  | 196.0879 | 4.3   | 7638   |
| 4  | 205.0598 | 12.3  | 21823  |
| 5  | 209.0213 | 2.5   | 4487   |
| 6  | 216.9226 | 2.7   | 4710   |
| 7  | 217.1045 | 3.0   | 5325   |
| 8  | 226.9513 | 9.4   | 16744  |
| 9  | 249.1092 | 3.1   | 5568   |
| 10 | 249.1568 | 2.4   | 4199   |
| 11 | 267.0624 | 2.9   | 5152   |
| 12 | 275.0063 | 4.2   | 7536   |
| 13 | 277.0050 | 4.5   | 7986   |
| 14 | 293.1354 | 2.2   | 3926   |
| 15 | 294.1095 | 4.8   | 8510   |
| 16 | 301.0749 | 3.7   | 6500   |
| 17 | 303.1377 | 4.5   | 8033   |
| 18 | 314.9988 | 52.1  | 92453  |
| 19 | 316.0019 | 7.3   | 13009  |
| 20 | 316.9969 | 48.6  | 86288  |
| 21 | 318.0001 | 7.7   | 13686  |
| 22 | 343.1300 | 27.3  | 48378  |
| 23 | 344.1334 | 6.6   | 11696  |
| 24 | 350.2660 | 11.2  | 19871  |
| 25 | 351.2690 | 2.7   | 4703   |
| 26 | 353.2657 | 2.8   | 5049   |
| 27 | 355.2810 | 2.4   | 4214   |
| 28 | 358.9793 | 2.5   | 4361   |
| 29 | 362.9258 | 3.1   | 5523   |
| 30 | 381.2965 | 2.8   | 4944   |
| 31 | 385.1407 | 22.7  | 40293  |
| 32 | 385.2916 | 2.7   | 4736   |
| 33 | 386.1441 | 5.7   | 10165  |
| 34 | 399.3071 | 3.4   | 6007   |
| 35 | 409.0409 | 4.6   | 8175   |
| 36 | 413.3227 | 2.2   | 3939   |
| 37 | 415.0424 | 3.1   | 5425   |
| 38 | 417.0393 | 2.2   | 3870   |
| 39 | 425.2862 | 2.6   | 4547   |
| 40 | 429.3176 | 2.9   | 5065   |
| 41 | 430.9133 | 2.7   | 4740   |
| 42 | 441.2970 | 6.1   | 10907  |
| 43 | 443.3338 | 4.5   | 7912   |
| 44 | 457.3485 | 2.4   | 4340   |
| 45 | 469.3250 | 5.4   | 9515   |
| 46 | 473.3439 | 2.4   | 4295   |
| 47 | 487.3596 | 4.3   | 7716   |
| 48 | 497.3955 | 4.0   | 7042   |
| 49 | 513.3390 | 3.6   | 6348   |
| 50 | 517.3699 | 2.2   | 3984   |
| 51 | 531.3858 | 3.3   | 5800   |
| 52 | 537.3935 | 3.1   | 5458   |
| 53 | 541.1199 | 5.2   | 9272   |
| 54 | 542.1207 | 2.5   | 4428   |
| 55 | 553.4587 | 100.0 | 177467 |
| 56 | 554.4617 | 36.1  | 64137  |
| 57 | 555.4649 | 6.8   | 12108  |
| 58 | 557.0937 | 2.9   | 5111   |
| 59 | 557.3647 | 4.1   | 7317   |
| 60 | 559.1297 | 2.2   | 3865   |
| 61 | 561.3964 | 2.1   | 3714   |
| 62 | 569.4322 | 5.3   | 9341   |

## High Resolution Mass Spectrometry Report

| #   | m/z      | I%   | I     |
|-----|----------|------|-------|
| 63  | 575.4118 | 2.7  | 4860  |
| 64  | 601.3910 | 3.3  | 5916  |
| 65  | 619.4385 | 2.1  | 3739  |
| 66  | 633.1486 | 2.4  | 4196  |
| 67  | 645.4171 | 3.0  | 5304  |
| 68  | 677.1446 | 5.6  | 9871  |
| 69  | 678.1479 | 2.7  | 4795  |
| 70  | 685.4348 | 42.2 | 74888 |
| 71  | 686.4378 | 19.9 | 35388 |
| 72  | 687.4401 | 4.8  | 8455  |
| 73  | 689.4437 | 2.3  | 4045  |
| 74  | 705.5811 | 3.4  | 5975  |
| 75  | 707.1681 | 2.1  | 3701  |
| 76  | 721.5761 | 2.6  | 4622  |
| 77  | 750.4059 | 2.8  | 4909  |
| 78  | 752.9320 | 2.2  | 3816  |
| 79  | 754.9311 | 2.6  | 4547  |
| 80  | 798.8798 | 2.5  | 4459  |
| 81  | 808.0302 | 3.4  | 5996  |
| 82  | 810.0295 | 2.5  | 4395  |
| 83  | 842.9580 | 3.1  | 5421  |
| 84  | 843.9631 | 5.0  | 8818  |
| 85  | 844.9619 | 7.9  | 14066 |
| 86  | 845.9638 | 5.9  | 10498 |
| 87  | 846.9626 | 9.5  | 16931 |
| 88  | 847.9651 | 4.3  | 7656  |
| 89  | 848.9632 | 6.3  | 11156 |
| 90  | 849.9656 | 2.7  | 4715  |
| 91  | 885.9768 | 2.1  | 3733  |
| 92  | 886.9749 | 3.5  | 6250  |
| 93  | 887.9758 | 3.0  | 5343  |
| 94  | 888.9748 | 4.4  | 7875  |
| 95  | 889.9766 | 2.2  | 3819  |
| 96  | 890.9750 | 3.1  | 5425  |
| 97  | 904.9219 | 2.6  | 4605  |
| 98  | 906.9226 | 2.1  | 3662  |
| 99  | 907.7708 | 5.2  | 9204  |
| 100 | 908.7748 | 3.1  | 5447  |

### Acquisition Parameter

|                   |                              |                |                                       |                |              |           |
|-------------------|------------------------------|----------------|---------------------------------------|----------------|--------------|-----------|
| <b>General</b>    | Fore Vacuum                  | 3.36e+000 mBar | High Vacuum                           | 9.05e-008 mBar | Source Type  | ESI       |
|                   | Scan Begin                   | 75 m/z         | Scan End                              | 2000 m/z       | Ion Polarity | Positive  |
| <b>Source</b>     | Set Nebulizer                | 2.0 Bar        | Set Capillary                         | 4500 V         | Set Dry Gas  | 8.0 l/min |
|                   | Set Dry Heater               | 200 °C         | Set End Plate Offset                  | -500 V         |              |           |
| <b>Quadrupole</b> | Set Ion Energy ( MS only )   | 4.0 eV         |                                       |                |              |           |
| <b>Coll. Cell</b> | Collision Energy             | 8.0 eV         | Set Collision Cell RF                 | 600.0 Vpp      | 100.0 Vpp    |           |
| <b>Ion Cooler</b> | Set Ion Cooler Transfer Time | 75.0 µs        | Set Ion Cooler Pre Pulse Storage Time | 10.0 µs        |              |           |

<sup>1</sup>H-NMR spectra of **3** in CD<sub>2</sub>Cl<sub>2</sub>

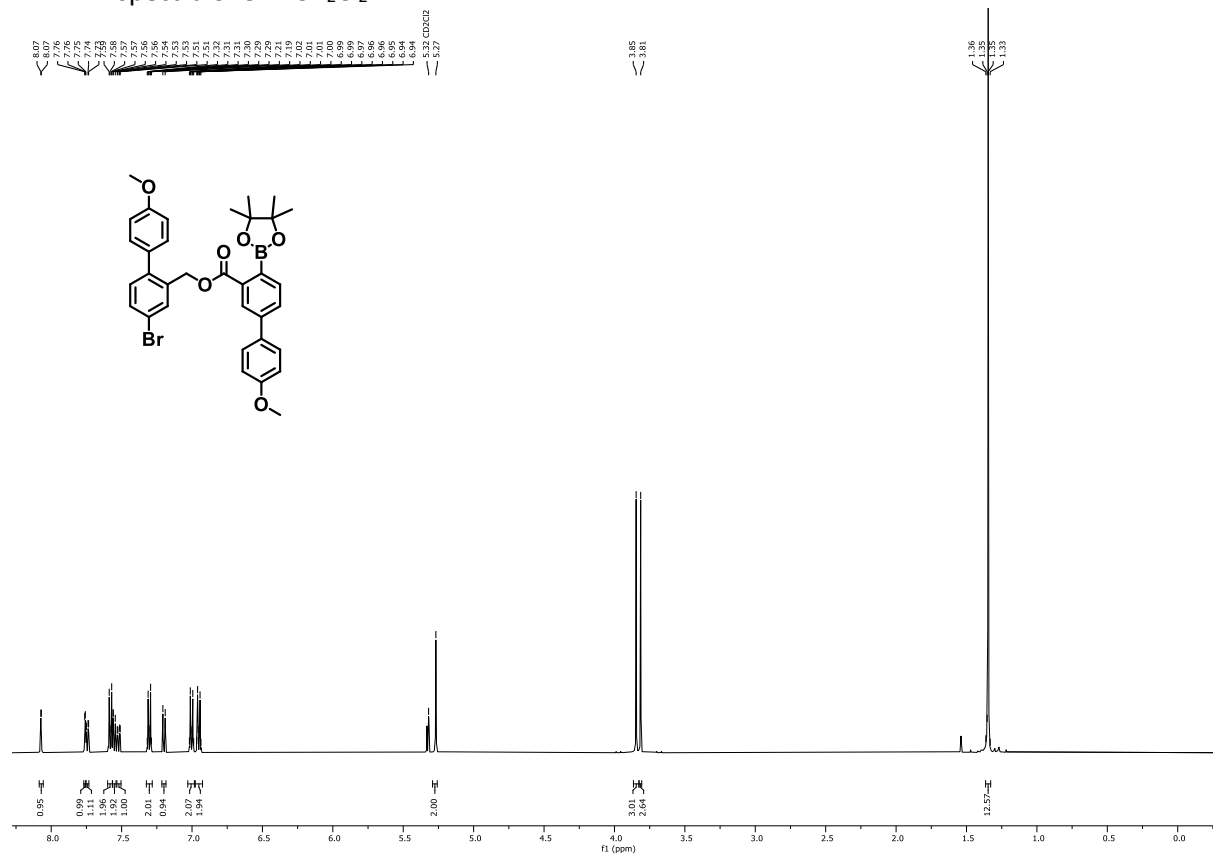

<sup>13</sup>C-NMR spectra of **3** in CD<sub>2</sub>Cl<sub>2</sub>

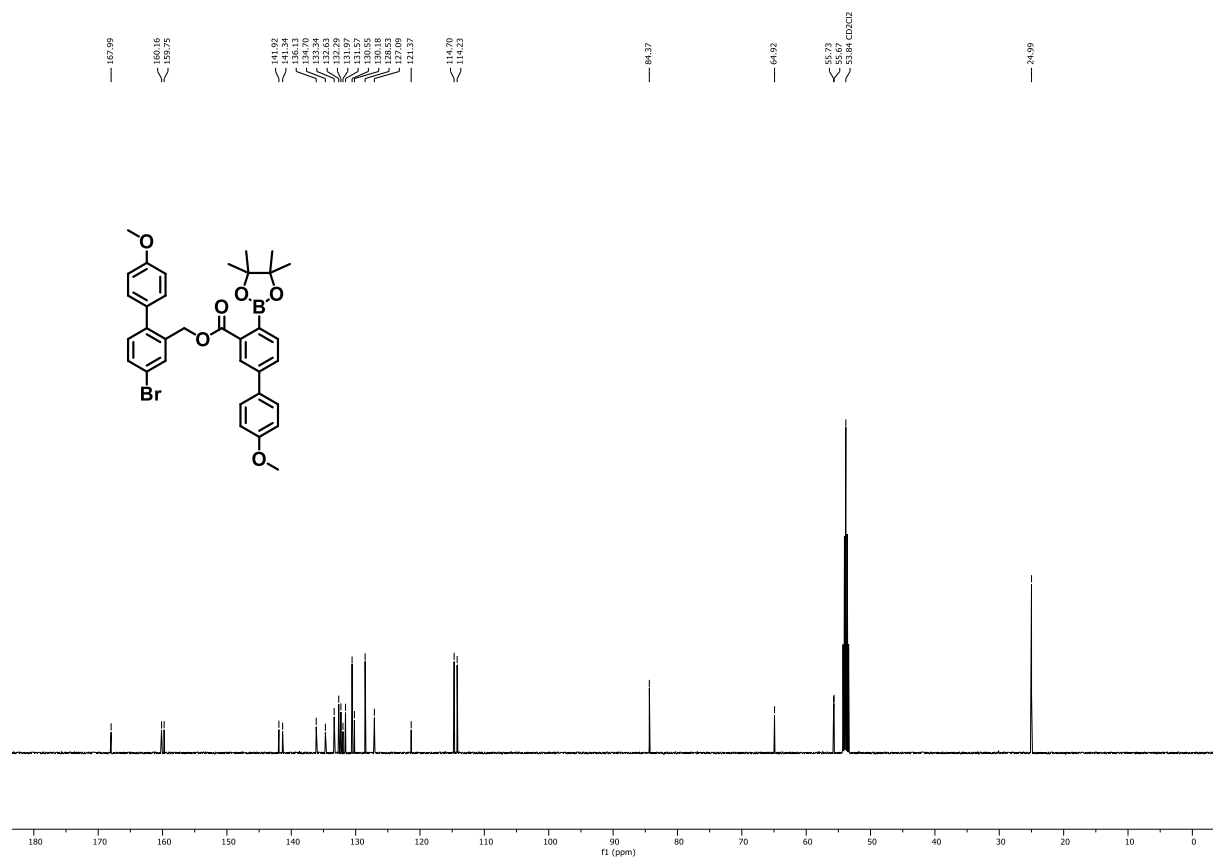

# HR-ESI-MS spectra of 3

## High Resolution Mass Spectrometry Report

Sample Name **kro277**  
Comment

Instrument **maXis 4G**  
Method **ms\_nocolumn\_mid\_pos.m**

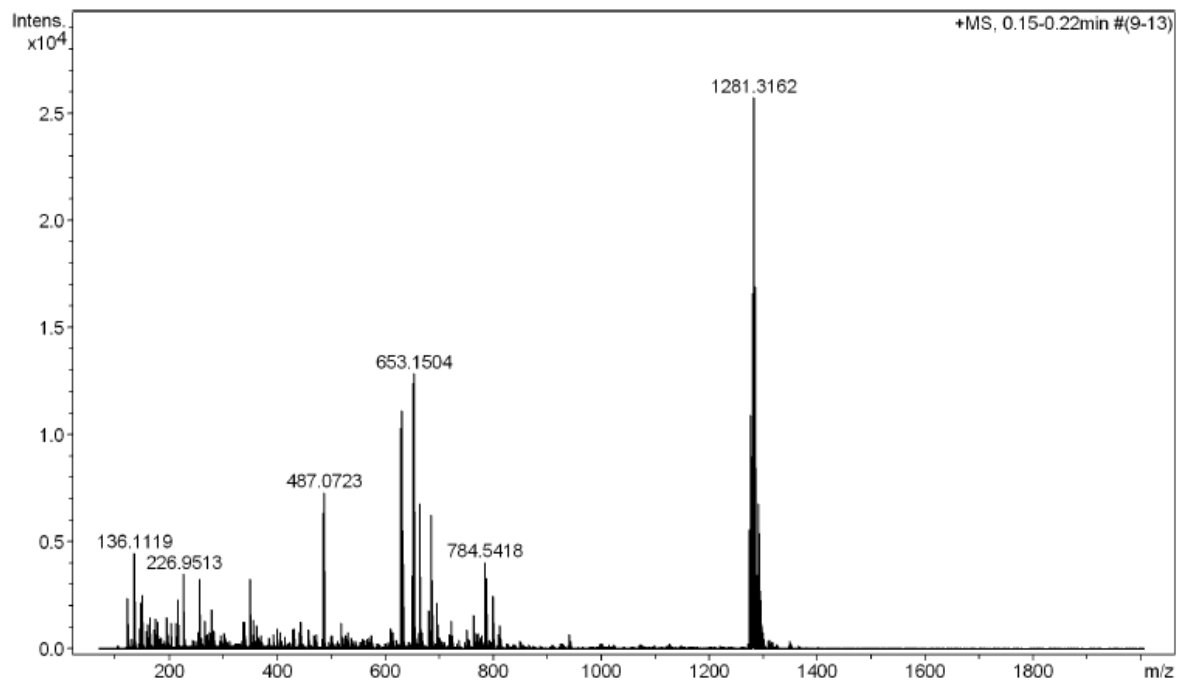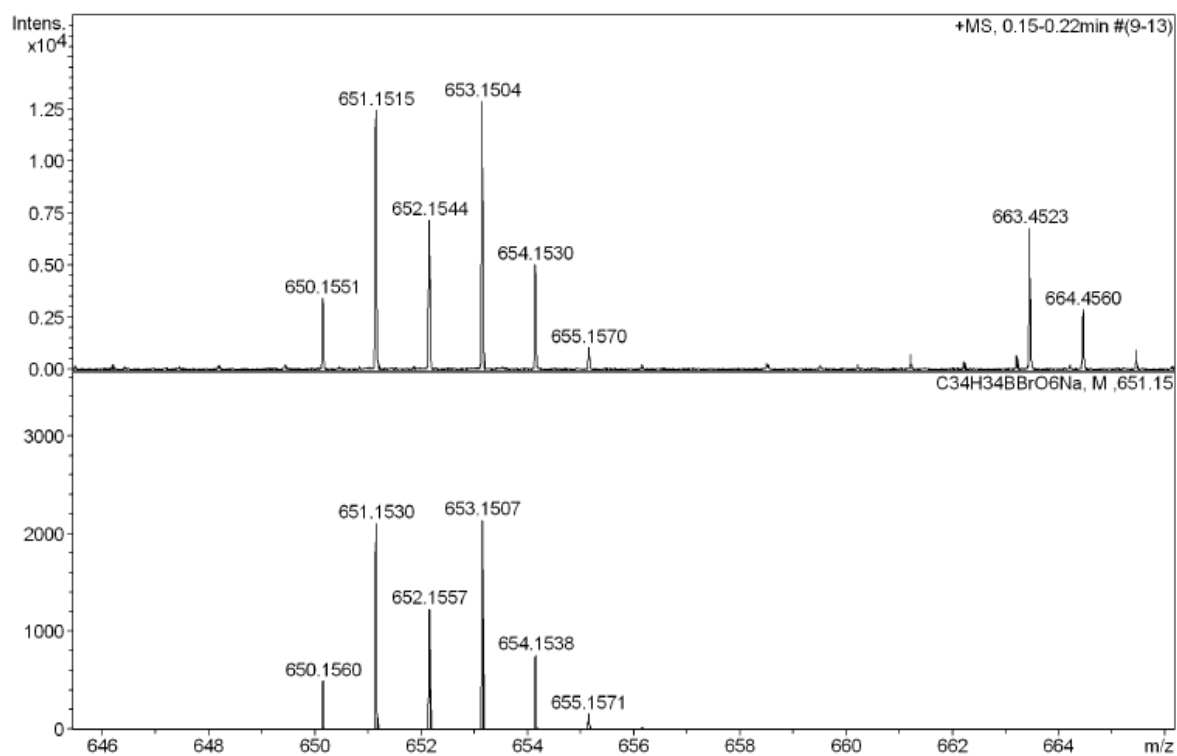

# High Resolution Mass Spectrometry Report

## Measured m/z vs. theoretical m/z

| Meas. m/z | # | Formula                    | Score  | m/z       | err [mDa] | err [ppm] | mSigma | rdb  | e <sup>-</sup> Conf | z  |
|-----------|---|----------------------------|--------|-----------|-----------|-----------|--------|------|---------------------|----|
| 651.1515  | 1 | C 34 H 34 B Br Na O 6      | 100.00 | 651.1530  | 0.9       | 1.4       | 27.1   | 17.5 | even                | 1+ |
| 1279.3179 | 1 | C 68 H 68 B 2 Br 2 Na O 12 | 100.00 | 1279.3158 | -2.1      | -1.6      | 55.1   | 34.5 | even                |    |

## Mass list

| #  | m/z       | I %  | I     |
|----|-----------|------|-------|
| 1  | 122.0962  | 9.2  | 2377  |
| 2  | 136.1119  | 17.4 | 4485  |
| 3  | 147.0915  | 7.0  | 1811  |
| 4  | 147.9309  | 8.4  | 2165  |
| 5  | 149.9307  | 8.6  | 2213  |
| 6  | 150.1278  | 9.9  | 2553  |
| 7  | 161.1072  | 4.6  | 1189  |
| 8  | 164.1430  | 5.7  | 1477  |
| 9  | 175.1229  | 5.5  | 1416  |
| 10 | 178.1587  | 4.9  | 1259  |
| 11 | 196.0880  | 5.8  | 1492  |
| 12 | 205.0599  | 4.7  | 1218  |
| 13 | 212.1431  | 4.8  | 1231  |
| 14 | 217.1044  | 9.0  | 2309  |
| 15 | 226.9513  | 13.7 | 3523  |
| 16 | 255.0820  | 12.7 | 3261  |
| 17 | 265.9622  | 5.2  | 1329  |
| 18 | 279.0933  | 7.2  | 1862  |
| 19 | 337.1603  | 5.1  | 1303  |
| 20 | 338.3406  | 5.0  | 1278  |
| 21 | 350.2659  | 12.7 | 3279  |
| 22 | 355.1699  | 5.3  | 1376  |
| 23 | 362.9259  | 4.4  | 1123  |
| 24 | 443.3331  | 5.0  | 1274  |
| 25 | 485.0739  | 24.7 | 6367  |
| 26 | 486.0771  | 8.8  | 2272  |
| 27 | 487.0723  | 28.5 | 7336  |
| 28 | 487.3595  | 4.3  | 1116  |
| 29 | 488.0757  | 10.3 | 2649  |
| 30 | 517.2941  | 4.8  | 1230  |
| 31 | 519.2955  | 4.4  | 1121  |
| 32 | 628.1738  | 9.9  | 2554  |
| 33 | 629.1698  | 40.1 | 10313 |
| 34 | 630.1729  | 23.5 | 6038  |
| 35 | 631.1688  | 43.3 | 11146 |
| 36 | 632.1715  | 15.7 | 4031  |
| 37 | 650.1551  | 13.3 | 3429  |
| 38 | 651.1515  | 48.3 | 12435 |
| 39 | 652.1544  | 27.9 | 7185  |
| 40 | 653.1504  | 50.0 | 12876 |
| 41 | 654.1530  | 19.6 | 5040  |
| 42 | 655.1570  | 4.1  | 1057  |
| 43 | 663.4523  | 26.4 | 6793  |
| 44 | 664.4560  | 11.3 | 2898  |
| 45 | 680.4789  | 6.9  | 1787  |
| 46 | 685.4346  | 24.3 | 6256  |
| 47 | 686.4385  | 12.5 | 3210  |
| 48 | 695.4893  | 8.5  | 2176  |
| 49 | 696.4939  | 4.5  | 1148  |
| 50 | 722.4907  | 5.2  | 1350  |
| 51 | 764.5734  | 6.2  | 1592  |
| 52 | 784.5418  | 15.9 | 4082  |
| 53 | 785.5429  | 11.5 | 2966  |
| 54 | 786.5359  | 13.0 | 3334  |
| 55 | 787.5364  | 5.3  | 1353  |
| 56 | 798.5561  | 9.6  | 2471  |
| 57 | 799.5597  | 5.8  | 1501  |
| 58 | 812.5735  | 4.4  | 1140  |
| 59 | 1273.3640 | 8.2  | 2111  |
| 60 | 1274.3612 | 21.8 | 5600  |
| 61 | 1275.3629 | 29.1 | 7478  |

## High Resolution Mass Spectrometry Report

| #  | m/z       | I%    | I     |
|----|-----------|-------|-------|
| 62 | 1276.3611 | 42.6  | 10964 |
| 63 | 1277.3615 | 35.0  | 9006  |
| 64 | 1278.3564 | 33.4  | 8603  |
| 65 | 1279.3179 | 51.8  | 13317 |
| 66 | 1280.3186 | 64.6  | 16631 |
| 67 | 1281.3162 | 100.0 | 25728 |
| 68 | 1282.3177 | 76.1  | 19574 |
| 69 | 1283.3154 | 65.7  | 16903 |
| 70 | 1284.3165 | 34.5  | 8876  |
| 71 | 1285.3185 | 11.5  | 2969  |
| 72 | 1288.3746 | 5.4   | 1387  |
| 73 | 1289.3716 | 13.6  | 3501  |
| 74 | 1290.3740 | 17.2  | 4437  |
| 75 | 1291.3711 | 26.4  | 6797  |
| 76 | 1292.3724 | 21.1  | 5427  |
| 77 | 1293.3698 | 17.3  | 4453  |
| 78 | 1294.3726 | 9.1   | 2343  |

### Acquisition Parameter

|                   |                              |                |                                       |                |              |           |
|-------------------|------------------------------|----------------|---------------------------------------|----------------|--------------|-----------|
| <b>General</b>    | Fore Vacuum                  | 3.36e+000 mBar | High Vacuum                           | 1.02e-007 mBar | Source Type  | ESI       |
|                   | Scan Begin                   | 75 m/z         | Scan End                              | 2000 m/z       | Ion Polarity | Positive  |
| <b>Source</b>     | Set Nebulizer                | 2.0 Bar        | Set Capillary                         | 4500 V         | Set Dry Gas  | 8.0 l/min |
|                   | Set Dry Heater               | 200 °C         | Set End Plate Offset                  | -500 V         |              |           |
| <b>Quadrupole</b> | Set Ion Energy ( MS only )   | 4.0 eV         |                                       |                |              |           |
| <b>Coll. Cell</b> | Collision Energy             | 8.0 eV         | Set Collision Cell RF                 | 600.0 Vpp      |              | 100.0 Vpp |
| <b>Ion Cooler</b> | Set Ion Cooler Transfer Time | 75.0 µs        | Set Ion Cooler Pre Pulse Storage Time |                |              | 10.0 µs   |



# <sup>1</sup>H-NMR spectra of **1** in CD<sub>2</sub>Cl<sub>2</sub>

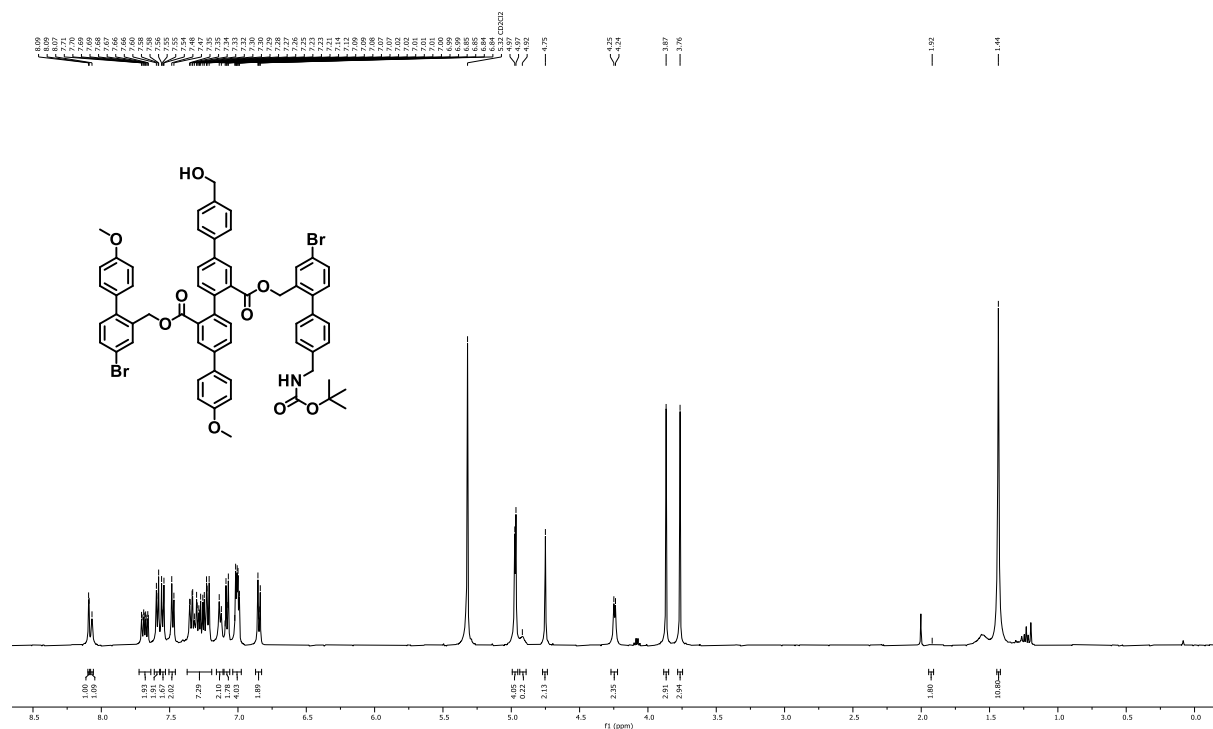

# <sup>13</sup>C-NMR spectra of **1** in CD<sub>2</sub>Cl<sub>2</sub>

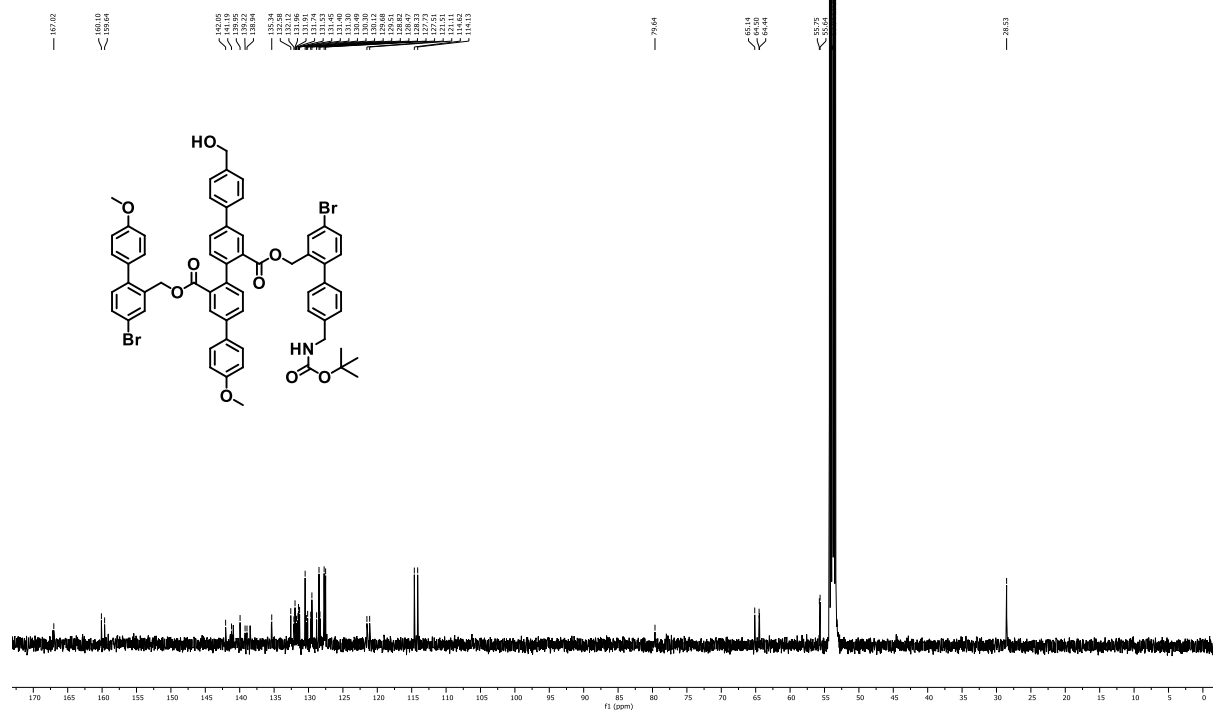

# HR-MS spectra of 1

## High Resolution Mass Spectrometry Report

Sample Name **KRO 346**  
Comment

Instrument **maXis 4G**  
Method **ms\_nocolumn\_mid\_pos.m**

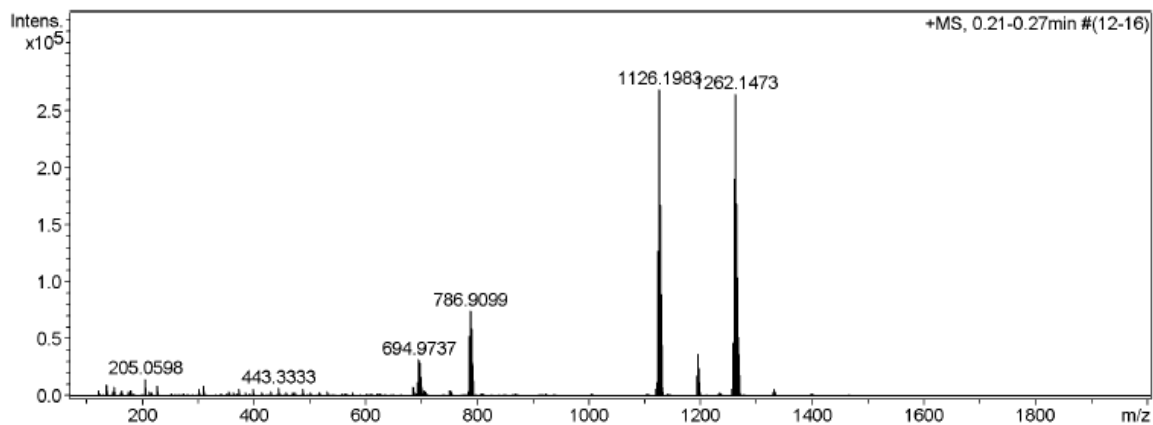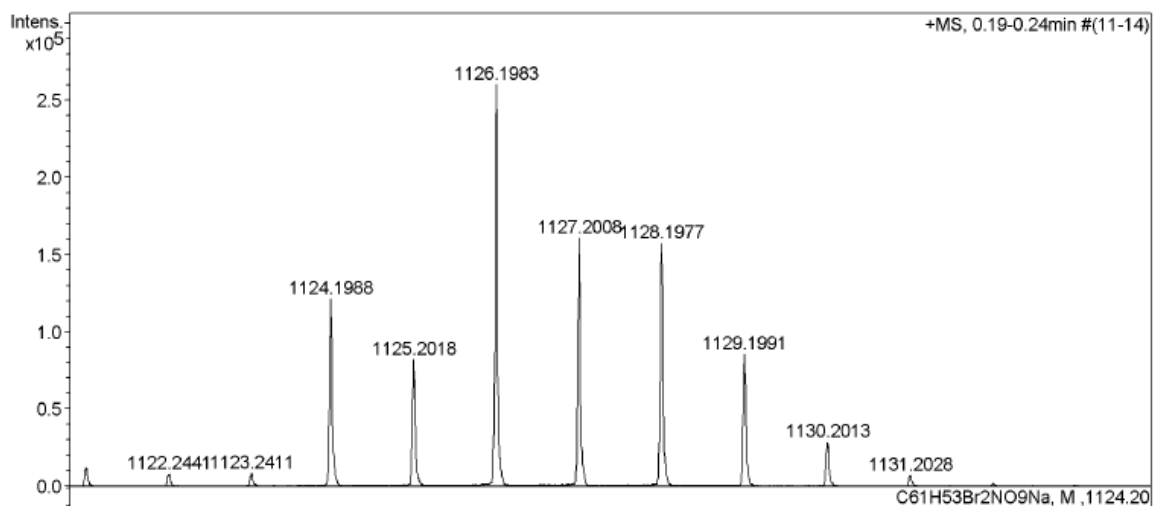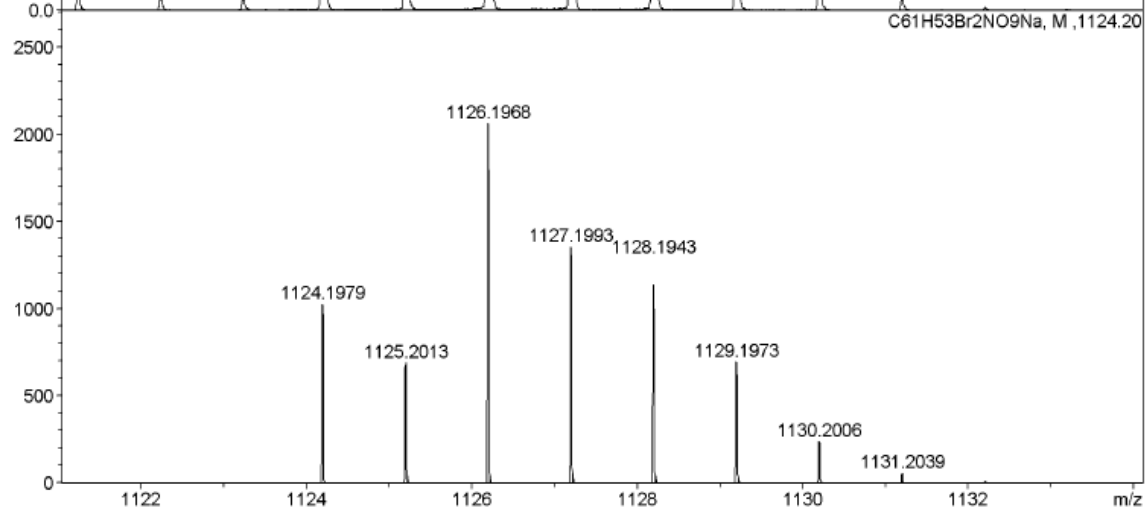

# High Resolution Mass Spectrometry Report

## Measured m/z vs. theoretical m/z

| Meas. m/z | # | Formula                 | Score  | m/z       | err [mDa] | err [ppm] | mSigma | rdb  | e <sup>-</sup> Conf | z  |
|-----------|---|-------------------------|--------|-----------|-----------|-----------|--------|------|---------------------|----|
| 1124.1988 | 1 | C 61 H 53 Br 2 N Na O 9 | 100.00 | 1124.1979 | -0.9      | -0.8      | 17.5   | 34.5 | even                | 1+ |

## Mass list

| #  | m/z      | I %  | I     |
|----|----------|------|-------|
| 1  | 122.0961 | 1.4  | 4302  |
| 2  | 136.1119 | 3.2  | 9485  |
| 3  | 147.0914 | 1.2  | 3522  |
| 4  | 150.1276 | 2.5  | 7535  |
| 5  | 161.1074 | 0.9  | 2697  |
| 6  | 164.1430 | 1.6  | 4679  |
| 7  | 175.1225 | 1.4  | 4185  |
| 8  | 178.1588 | 1.6  | 4760  |
| 9  | 205.0598 | 4.9  | 14697 |
| 10 | 212.1431 | 1.3  | 3888  |
| 11 | 213.1459 | 1.0  | 2992  |
| 12 | 217.1044 | 1.2  | 3510  |
| 13 | 226.1587 | 0.9  | 2560  |
| 14 | 226.9512 | 3.4  | 10120 |
| 15 | 301.0749 | 2.0  | 6064  |
| 16 | 309.1303 | 3.0  | 9024  |
| 17 | 355.2813 | 1.5  | 4607  |
| 18 | 362.9257 | 1.4  | 4252  |
| 19 | 372.1947 | 2.1  | 6254  |
| 20 | 385.2917 | 1.0  | 3066  |
| 21 | 399.3071 | 2.0  | 6055  |
| 22 | 413.3229 | 1.0  | 3025  |
| 23 | 429.3182 | 1.3  | 3987  |
| 24 | 430.9132 | 1.4  | 4117  |
| 25 | 443.3333 | 2.4  | 7027  |
| 26 | 457.3487 | 1.2  | 3497  |
| 27 | 469.3266 | 1.2  | 3633  |
| 28 | 473.3433 | 1.2  | 3685  |
| 29 | 487.3592 | 1.9  | 5750  |
| 30 | 498.9005 | 0.9  | 2568  |
| 31 | 501.3756 | 1.0  | 2878  |
| 32 | 517.3703 | 1.1  | 3157  |
| 33 | 531.3859 | 1.3  | 3862  |
| 34 | 566.8878 | 1.0  | 3047  |
| 35 | 575.4115 | 1.2  | 3559  |
| 36 | 685.4340 | 2.6  | 7888  |
| 37 | 686.4374 | 1.2  | 3637  |
| 38 | 691.9823 | 1.1  | 3126  |
| 39 | 692.9757 | 3.8  | 11188 |
| 40 | 693.9748 | 6.7  | 19924 |
| 41 | 694.9738 | 10.3 | 30542 |
| 42 | 695.9747 | 4.9  | 14622 |
| 43 | 696.9728 | 9.4  | 28009 |
| 44 | 697.9754 | 3.8  | 11407 |
| 45 | 698.9729 | 5.3  | 15769 |
| 46 | 699.9758 | 2.0  | 5949  |
| 47 | 700.9724 | 1.2  | 3699  |
| 48 | 702.8626 | 0.9  | 2580  |
| 49 | 704.0036 | 1.3  | 3901  |
| 50 | 705.0018 | 1.8  | 5278  |
| 51 | 707.0013 | 1.3  | 3948  |
| 52 | 750.0307 | 1.8  | 5397  |
| 53 | 752.0293 | 1.9  | 5611  |
| 54 | 782.9109 | 1.3  | 4007  |
| 55 | 783.9138 | 1.5  | 4381  |
| 56 | 784.9093 | 9.3  | 27752 |
| 57 | 785.9105 | 19.3 | 57310 |
| 58 | 786.9100 | 26.8 | 79880 |
| 59 | 787.9120 | 9.5  | 28357 |
| 60 | 788.9092 | 21.7 | 64494 |
| 61 | 789.9119 | 7.7  | 22980 |
| 62 | 790.9102 | 10.0 | 29894 |

## High Resolution Mass Spectrometry Report

| #   | m/z       | I%    | I      |
|-----|-----------|-------|--------|
| 63  | 791.9127  | 3.6   | 10816  |
| 64  | 921.7499  | 1.1   | 3167   |
| 65  | 1004.1604 | 0.9   | 2779   |
| 66  | 1119.2424 | 2.0   | 6073   |
| 67  | 1120.2456 | 1.4   | 4161   |
| 68  | 1121.2414 | 4.2   | 12630  |
| 69  | 1122.2441 | 2.7   | 8130   |
| 70  | 1123.2411 | 2.9   | 8505   |
| 71  | 1124.1988 | 40.8  | 121389 |
| 72  | 1125.2018 | 27.7  | 82394  |
| 73  | 1126.1983 | 87.4  | 260260 |
| 74  | 1127.2008 | 54.1  | 161042 |
| 75  | 1128.1977 | 53.0  | 157795 |
| 76  | 1129.1991 | 28.9  | 85930  |
| 77  | 1130.2013 | 9.7   | 28868  |
| 78  | 1131.2028 | 2.5   | 7327   |
| 79  | 1192.1862 | 5.2   | 15364  |
| 80  | 1193.1894 | 3.4   | 10110  |
| 81  | 1194.1849 | 10.3  | 30710  |
| 82  | 1195.1882 | 6.8   | 20236  |
| 83  | 1196.1851 | 6.9   | 20686  |
| 84  | 1197.1866 | 3.8   | 11183  |
| 85  | 1198.1897 | 1.3   | 3888   |
| 86  | 1256.1469 | 2.1   | 6361   |
| 87  | 1257.1500 | 3.3   | 9884   |
| 88  | 1258.1468 | 17.5  | 52155  |
| 89  | 1259.1479 | 39.4  | 117240 |
| 90  | 1260.1476 | 72.8  | 216781 |
| 91  | 1261.1481 | 69.7  | 207364 |
| 92  | 1262.1473 | 100.0 | 297652 |
| 93  | 1263.1491 | 58.3  | 173520 |
| 94  | 1264.1473 | 63.3  | 188493 |
| 95  | 1265.1492 | 38.8  | 115480 |
| 96  | 1266.1482 | 26.5  | 78953  |
| 97  | 1267.1485 | 14.0  | 41535  |
| 98  | 1268.1511 | 4.9   | 14628  |
| 99  | 1269.1543 | 1.3   | 4011   |
| 100 | 1330.1579 | 1.2   | 3457   |

### Acquisition Parameter

|                   |                              |                |                                       |                |              |           |
|-------------------|------------------------------|----------------|---------------------------------------|----------------|--------------|-----------|
| <b>General</b>    | Fore Vacuum                  | 3.07e+000 mBar | High Vacuum                           | 1.34e-007 mBar | Source Type  | ESI       |
|                   | Scan Begin                   | 75 m/z         | Scan End                              | 2000 m/z       | Ion Polarity | Positive  |
| <b>Source</b>     | Set Nebulizer                | 2.0 Bar        | Set Capillary                         | 4500 V         | Set Dry Gas  | 8.0 l/min |
|                   | Set Dry Heater               | 200 °C         | Set End Plate Offset                  | -500 V         |              |           |
| <b>Quadrupole</b> | Set Ion Energy ( MS only )   | 4.0 eV         |                                       |                |              |           |
| <b>Coll. Cell</b> | Collision Energy             | 8.0 eV         | Set Collision Cell RF                 | 600.0 Vpp      |              | 100.0 Vpp |
| <b>Ion Cooler</b> | Set Ion Cooler Transfer Time | 75.0 µs        | Set Ion Cooler Pre Pulse Storage Time |                |              | 10.0 µs   |

<sup>1</sup>H-NMR spectra of **C**<sub>1</sub> in CD<sub>2</sub>Cl<sub>2</sub>

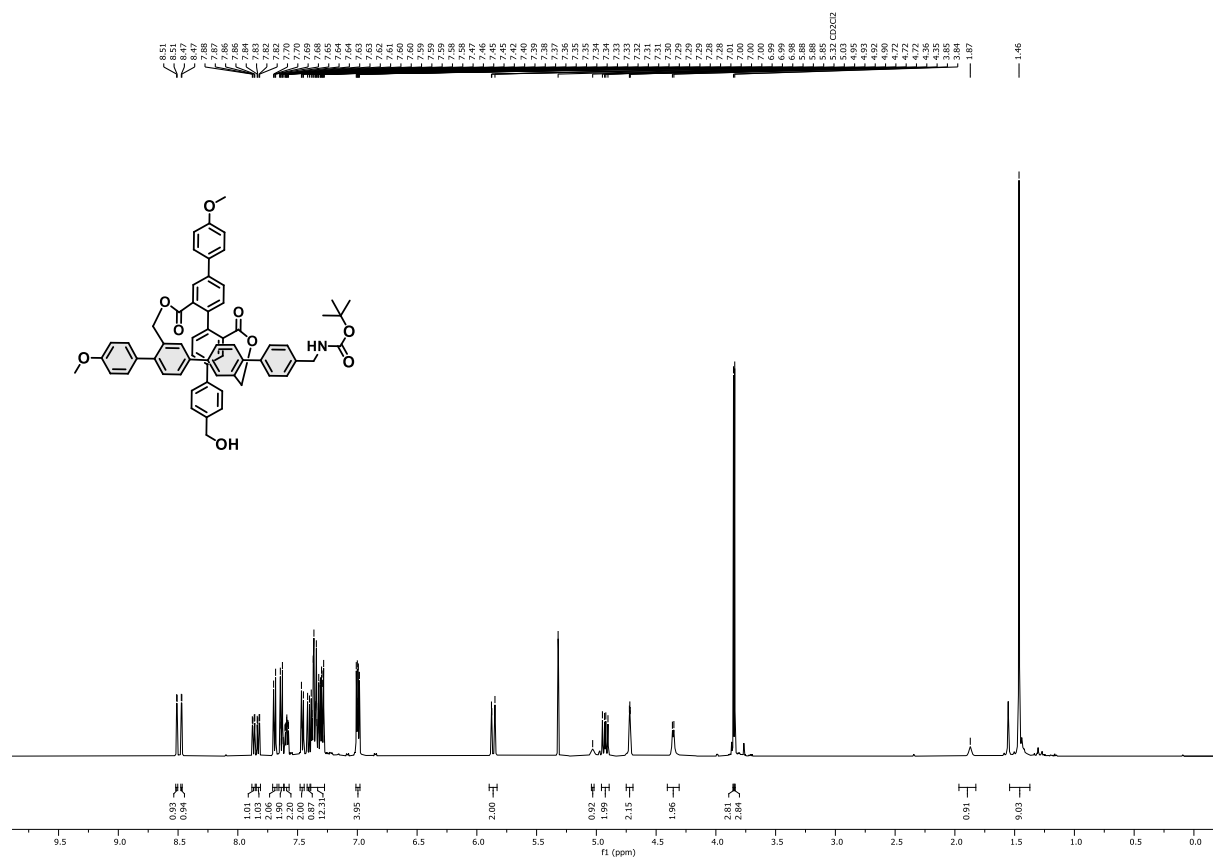

<sup>13</sup>C-NMR spectra of **C**<sub>1</sub> in CD<sub>2</sub>Cl<sub>2</sub>

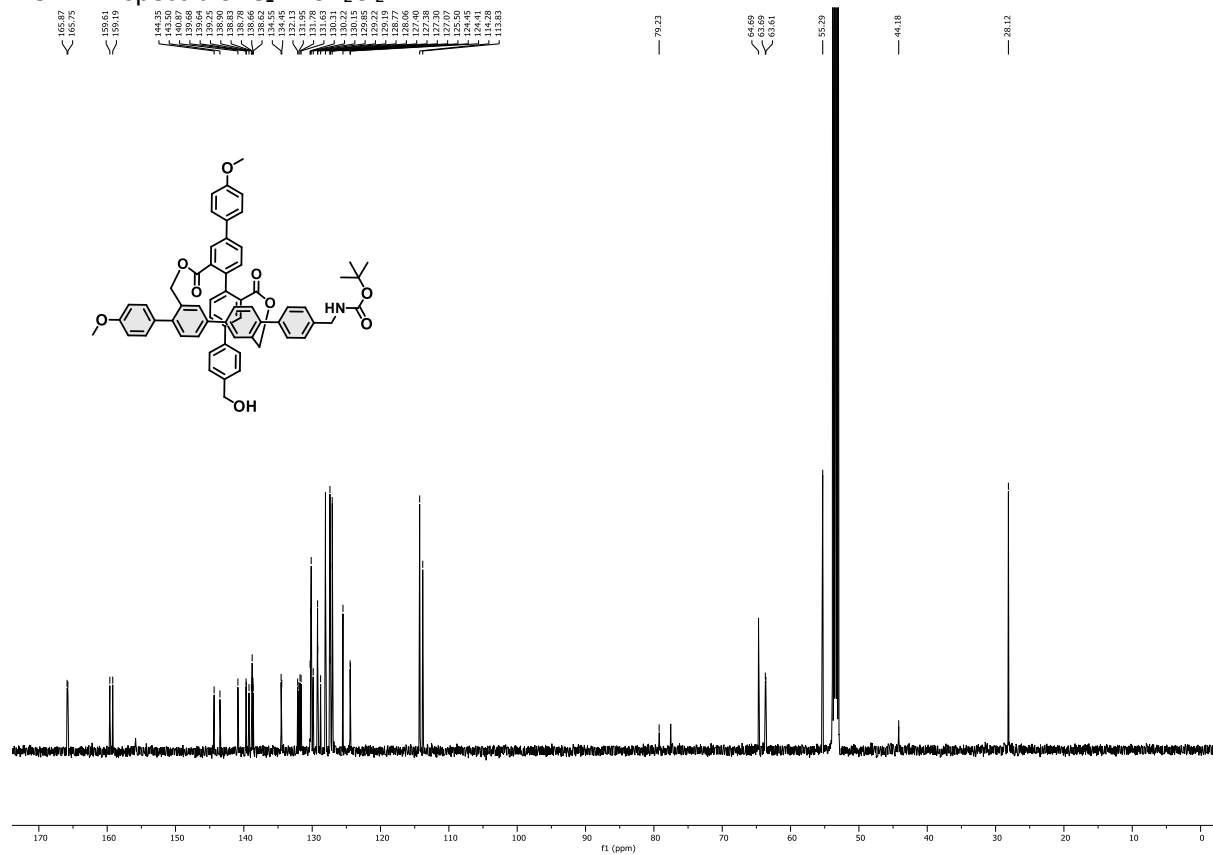

COSY spectra of **C**<sub>1</sub> in CD<sub>2</sub>Cl<sub>2</sub>

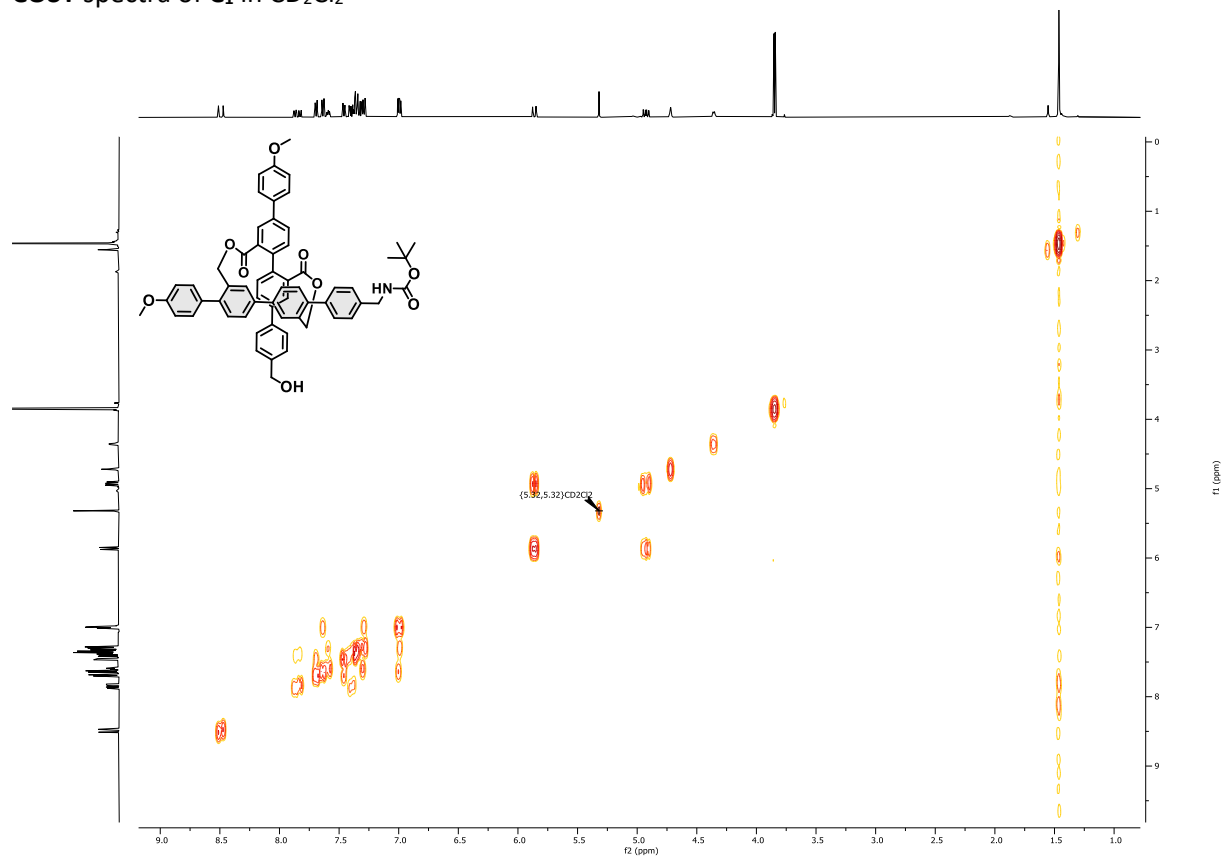

HMQC spectra of **C**<sub>1</sub> in CD<sub>2</sub>Cl<sub>2</sub>

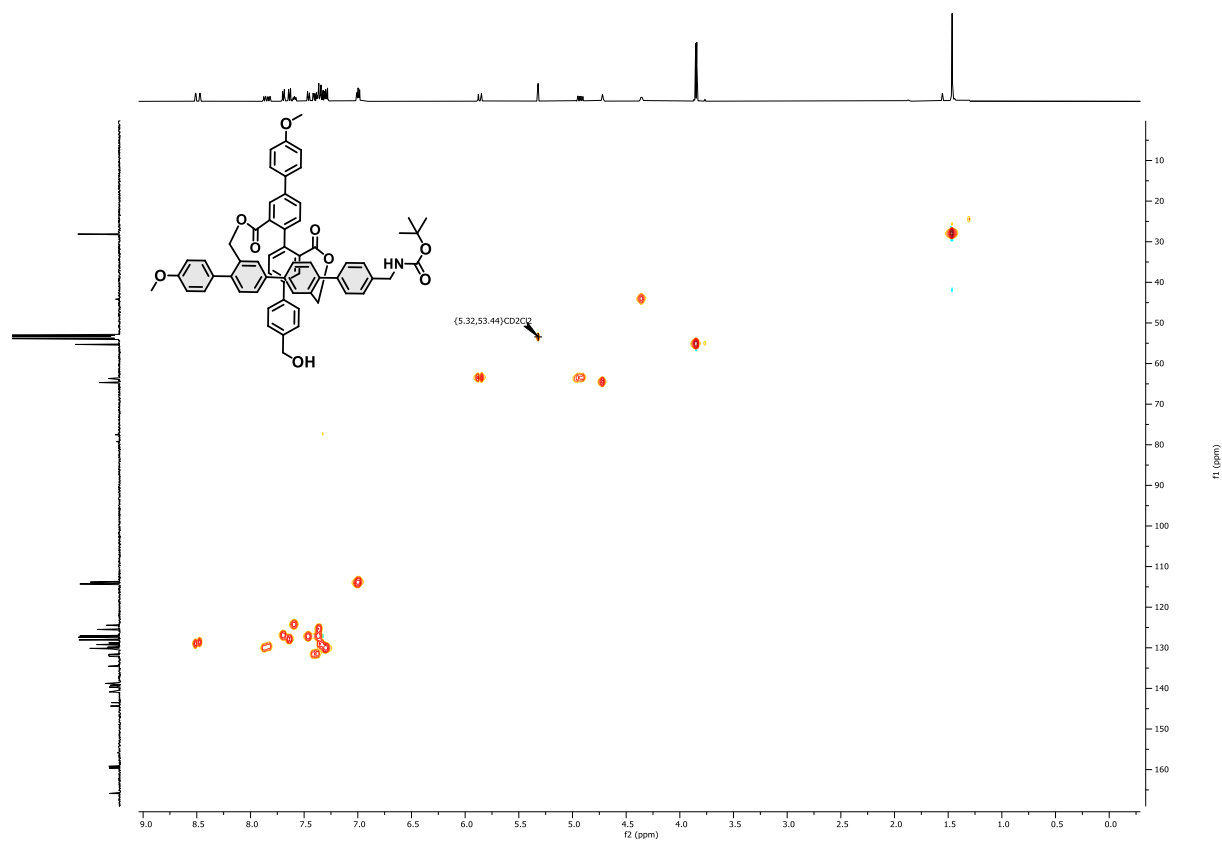

### HMBC spectra of C<sub>1</sub> in CD<sub>2</sub>Cl<sub>2</sub>

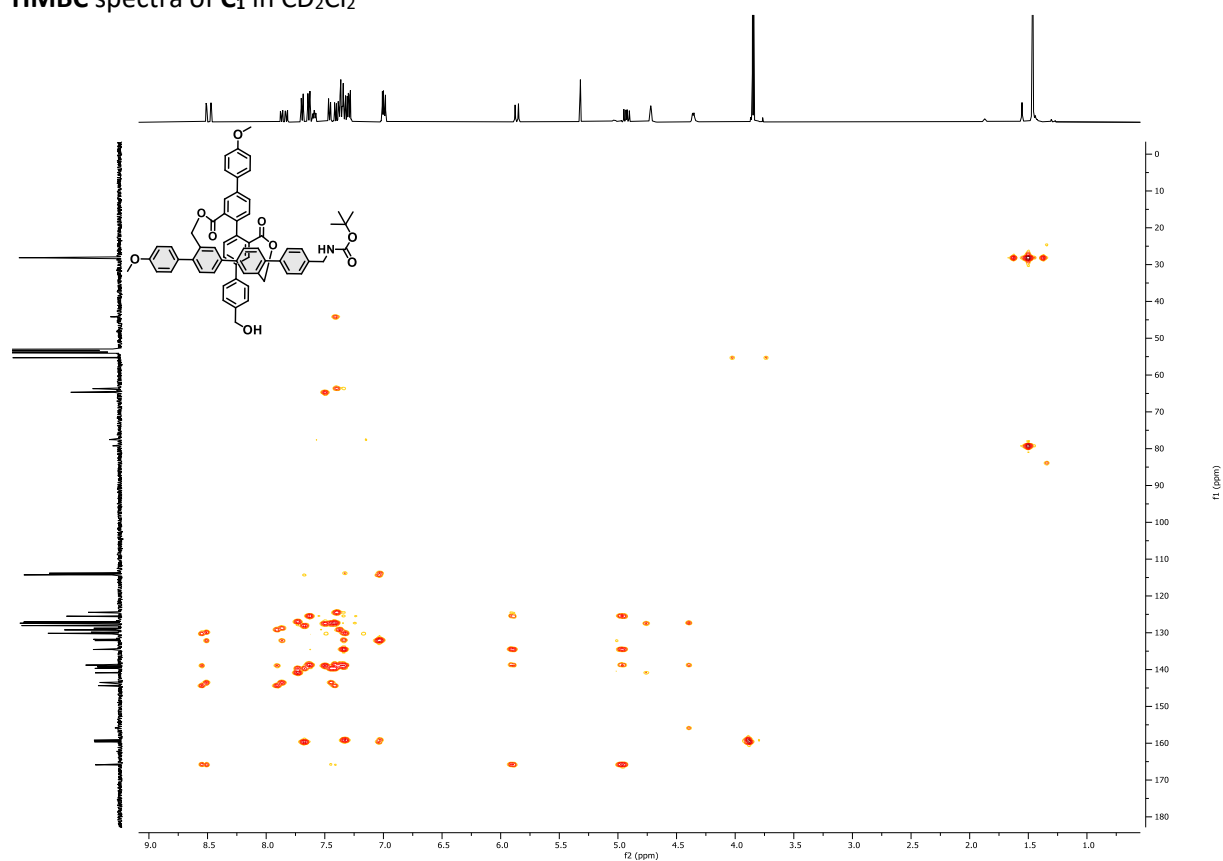

### NOESY spectra of C<sub>1</sub> in CD<sub>2</sub>Cl<sub>2</sub>

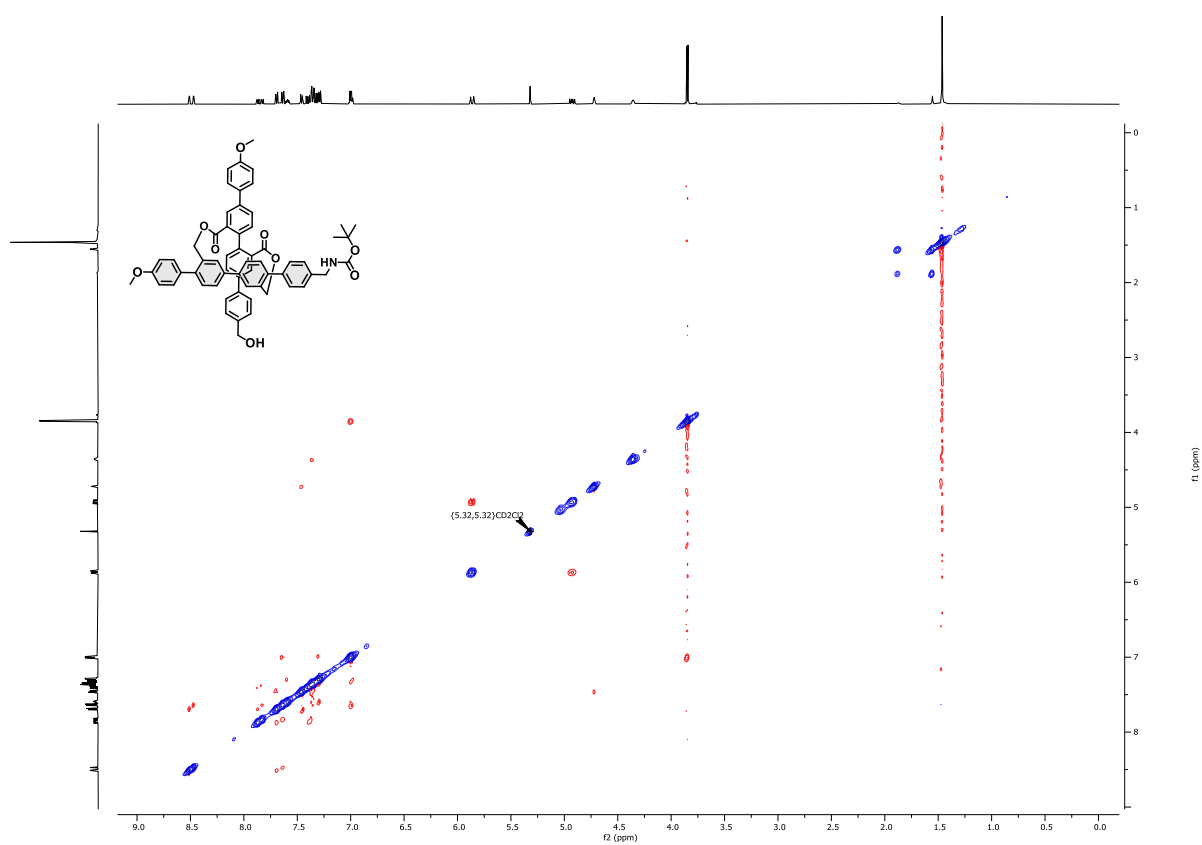

HR-MS spectra of C<sub>1</sub>

## High Resolution Mass Spectrometry Report

Sample Name **kro 305**  
Comment

Instrument maXis 4G  
Method ms\_nocolumn\_high\_pos\_use\_acn.m

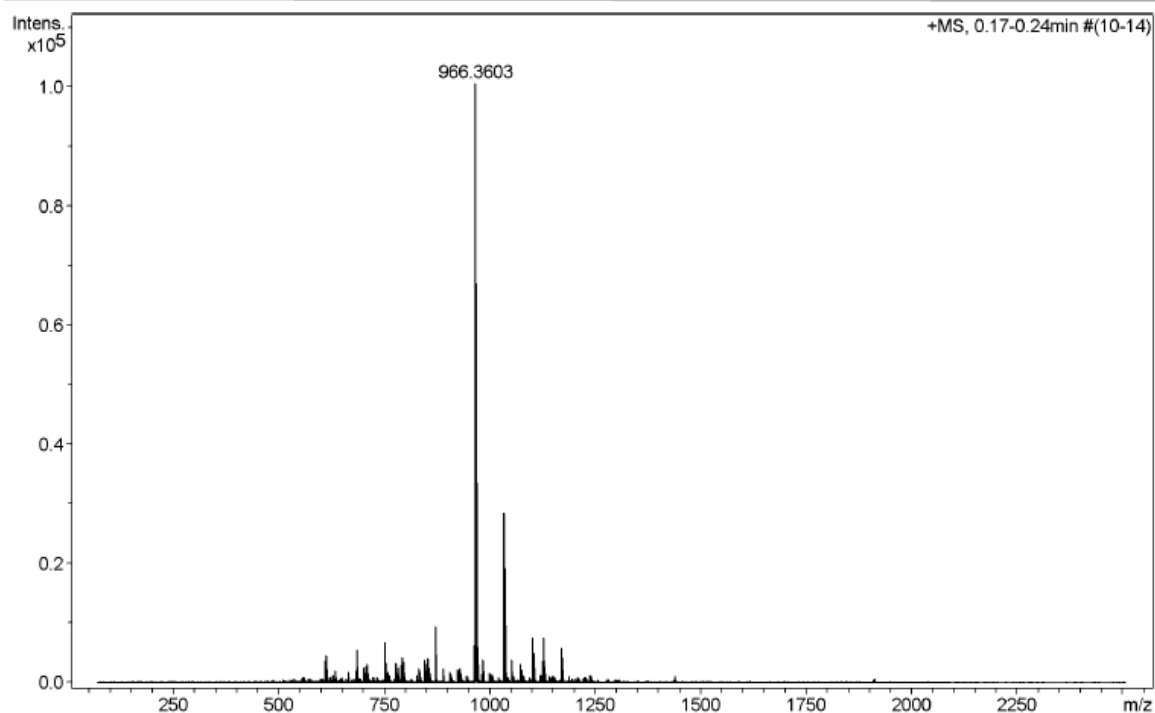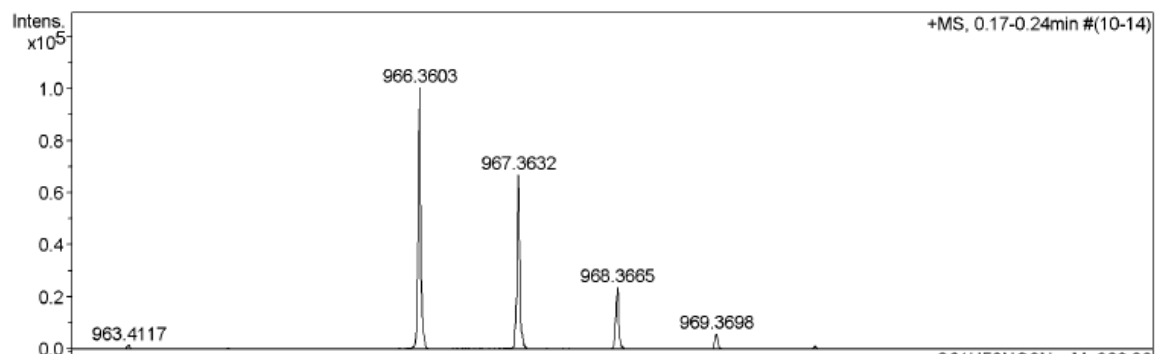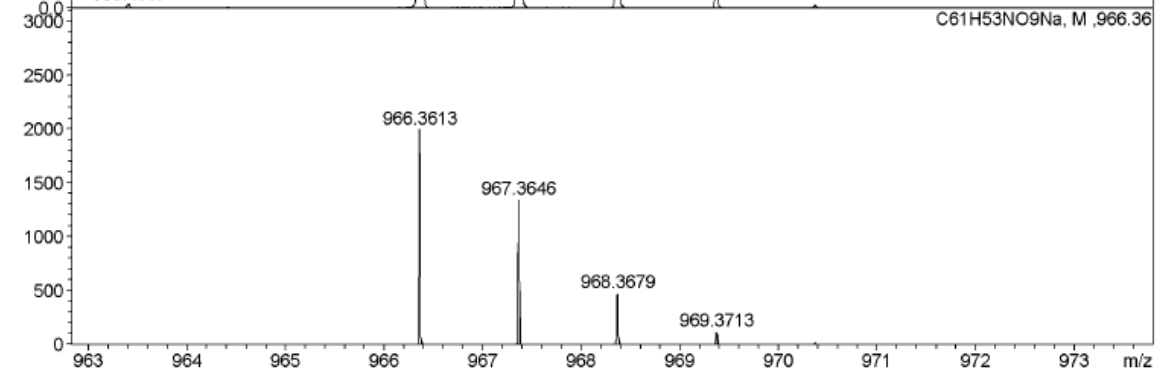



---

## High Resolution Mass Spectrometry Report

---

### Measured m/z vs. theoretical m/z

| Meas. m/z | # | Formula            | Score  | m/z      | err [mDa] | err [ppm] | mSigma | rdb  | e <sup>-</sup> Conf | z  |
|-----------|---|--------------------|--------|----------|-----------|-----------|--------|------|---------------------|----|
| 966.3603  | 1 | C 61 H 53 N Na O 9 | 100.00 | 966.3613 | 0.9       | 0.9       | 1.3    | 35.5 | even                | 1+ |

---

### Mass list

| #  | m/z      | I%  | I    |
|----|----------|-----|------|
| 1  | 610.1833 | 3.6 | 3631 |
| 2  | 611.1869 | 4.6 | 4596 |
| 3  | 612.1850 | 2.2 | 2216 |
| 4  | 633.1490 | 1.9 | 1934 |
| 5  | 663.4558 | 1.5 | 1535 |
| 6  | 684.2004 | 2.0 | 2054 |
| 7  | 685.4339 | 5.5 | 5583 |
| 8  | 686.1999 | 1.5 | 1462 |
| 9  | 686.4371 | 2.7 | 2707 |
| 10 | 702.2121 | 2.5 | 2528 |
| 11 | 703.2133 | 1.6 | 1653 |
| 12 | 707.1675 | 2.7 | 2749 |
| 13 | 708.1669 | 1.7 | 1705 |
| 14 | 709.1658 | 1.5 | 1512 |
| 15 | 709.3787 | 3.1 | 3127 |
| 16 | 710.3817 | 1.5 | 1476 |
| 17 | 711.3782 | 1.5 | 1559 |
| 18 | 750.4056 | 6.8 | 6880 |
| 19 | 751.4086 | 3.1 | 3083 |
| 20 | 752.4047 | 3.4 | 3380 |
| 21 | 753.3544 | 1.6 | 1623 |
| 22 | 753.4073 | 1.8 | 1829 |
| 23 | 755.3553 | 1.7 | 1691 |
| 24 | 758.2201 | 1.9 | 1881 |
| 25 | 759.2205 | 1.7 | 1679 |
| 26 | 776.2314 | 3.3 | 3277 |
| 27 | 777.2313 | 2.2 | 2209 |
| 28 | 778.2303 | 1.9 | 1879 |
| 29 | 781.1851 | 2.5 | 2503 |
| 30 | 782.1863 | 2.1 | 2096 |
| 31 | 783.1844 | 1.7 | 1735 |
| 32 | 791.3739 | 2.9 | 2951 |
| 33 | 792.3729 | 4.2 | 4232 |
| 34 | 793.3766 | 1.8 | 1814 |
| 35 | 794.3737 | 3.4 | 3458 |
| 36 | 795.3763 | 1.5 | 1471 |
| 37 | 796.3747 | 1.9 | 1906 |
| 38 | 832.2383 | 2.4 | 2372 |
| 39 | 833.2392 | 1.8 | 1801 |
| 40 | 834.2377 | 1.6 | 1627 |
| 41 | 844.3255 | 3.8 | 3803 |
| 42 | 845.3284 | 2.3 | 2282 |
| 43 | 850.2489 | 3.0 | 3063 |
| 44 | 851.2499 | 2.4 | 2431 |
| 45 | 852.2473 | 1.8 | 1834 |
| 46 | 852.2930 | 3.9 | 3962 |
| 47 | 853.2978 | 2.5 | 2562 |
| 48 | 855.2051 | 2.5 | 2552 |
| 49 | 856.2054 | 1.9 | 1941 |
| 50 | 857.2050 | 1.7 | 1692 |
| 51 | 870.3044 | 9.4 | 9506 |
| 52 | 871.3084 | 5.8 | 5877 |
| 53 | 872.3108 | 2.4 | 2434 |
| 54 | 888.3163 | 2.4 | 2443 |
| 55 | 889.3175 | 1.7 | 1753 |
| 56 | 906.2580 | 1.8 | 1830 |
| 57 | 907.2588 | 1.5 | 1481 |
| 58 | 908.2566 | 1.4 | 1439 |
| 59 | 924.2694 | 2.3 | 2268 |
| 60 | 925.2691 | 1.9 | 1934 |
| 61 | 926.2686 | 1.9 | 1874 |
| 62 | 929.2243 | 2.3 | 2293 |

## High Resolution Mass Spectrometry Report

| #   | m/z       | I%    | I      |
|-----|-----------|-------|--------|
| 63  | 930.2239  | 1.6   | 1591   |
| 64  | 961.4037  | 6.2   | 6256   |
| 65  | 962.4070  | 4.1   | 4149   |
| 66  | 963.4117  | 1.6   | 1658   |
| 67  | 966.3603  | 100.0 | 100647 |
| 68  | 967.3632  | 66.7  | 67130  |
| 69  | 968.3665  | 23.8  | 23976  |
| 70  | 969.3698  | 6.1   | 6139   |
| 71  | 980.2766  | 1.4   | 1454   |
| 72  | 982.3338  | 3.8   | 3868   |
| 73  | 983.3364  | 2.9   | 2923   |
| 74  | 999.2903  | 1.6   | 1599   |
| 75  | 1000.2864 | 1.4   | 1409   |
| 76  | 1003.2413 | 1.5   | 1492   |
| 77  | 1034.3472 | 28.4  | 28604  |
| 78  | 1035.3504 | 19.1  | 19246  |
| 79  | 1036.3533 | 7.3   | 7317   |
| 80  | 1037.3560 | 1.8   | 1799   |
| 81  | 1050.3215 | 1.6   | 1602   |
| 82  | 1051.3341 | 3.9   | 3938   |
| 83  | 1052.3386 | 2.5   | 2507   |
| 84  | 1073.3580 | 3.1   | 3072   |
| 85  | 1074.2991 | 1.6   | 1597   |
| 86  | 1074.3613 | 2.2   | 2215   |
| 87  | 1102.3347 | 7.6   | 7644   |
| 88  | 1103.3375 | 4.9   | 4942   |
| 89  | 1104.3406 | 2.1   | 2104   |
| 90  | 1124.1959 | 3.6   | 3595   |
| 91  | 1125.2008 | 2.3   | 2321   |
| 92  | 1126.1951 | 7.6   | 7643   |
| 93  | 1127.1981 | 4.6   | 4607   |
| 94  | 1128.1952 | 4.4   | 4399   |
| 95  | 1129.1978 | 2.7   | 2767   |
| 96  | 1170.3212 | 5.8   | 5849   |
| 97  | 1170.4930 | 2.1   | 2088   |
| 98  | 1171.3250 | 4.3   | 4306   |
| 99  | 1171.4967 | 1.6   | 1594   |
| 100 | 1172.3293 | 1.6   | 1621   |

### Acquisition Parameter

|                   |                              |                |                                       |                |              |           |
|-------------------|------------------------------|----------------|---------------------------------------|----------------|--------------|-----------|
| <b>General</b>    | Fore Vacuum                  | 3.36e+000 mBar | High Vacuum                           | 1.20e-007 mBar | Source Type  | ESI       |
|                   | Scan Begin                   | 75 m/z         | Scan End                              | 2500 m/z       | Ion Polarity | Positive  |
| <b>Source</b>     | Set Nebulizer                | 2.0 Bar        | Set Capillary                         | 4500 V         | Set Dry Gas  | 8.0 l/min |
|                   | Set Dry Heater               | 200 °C         | Set End Plate Offset                  | -500 V         |              |           |
| <b>Quadrupole</b> | Set Ion Energy ( MS only )   | 4.0 eV         |                                       |                | 800.0 Vpp    |           |
| <b>Coll. Cell</b> | Collision Energy             | 12.0 eV        | Set Collision Cell RF                 | 2000.0 Vpp     |              |           |
| <b>Ion Cooler</b> | Set Ion Cooler Transfer Time | 120.0 µs       | Set Ion Cooler Pre Pulse Storage Time | 18.0 µs        |              |           |



### COSY spectra of C<sub>2</sub> in CD<sub>2</sub>Cl<sub>2</sub>

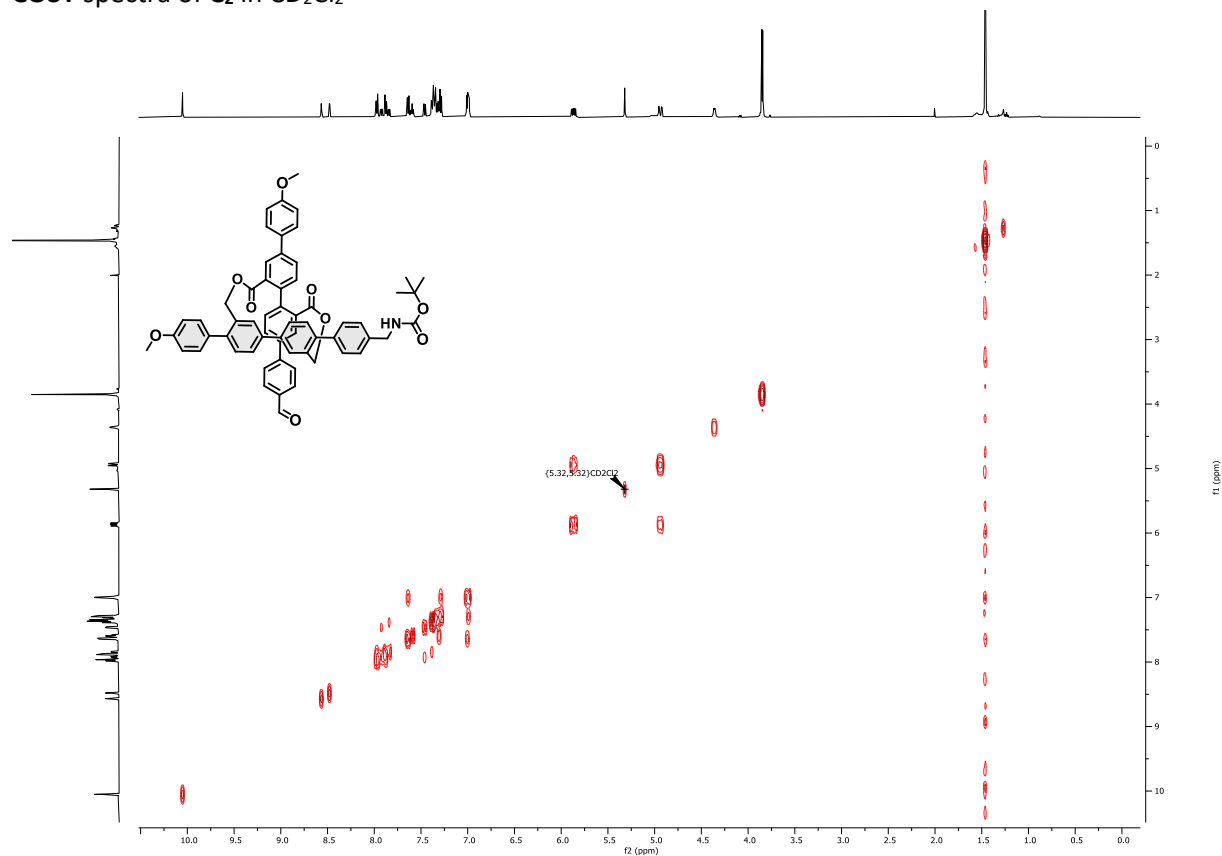

### HMQC spectra of C<sub>2</sub> in CD<sub>2</sub>Cl<sub>2</sub>

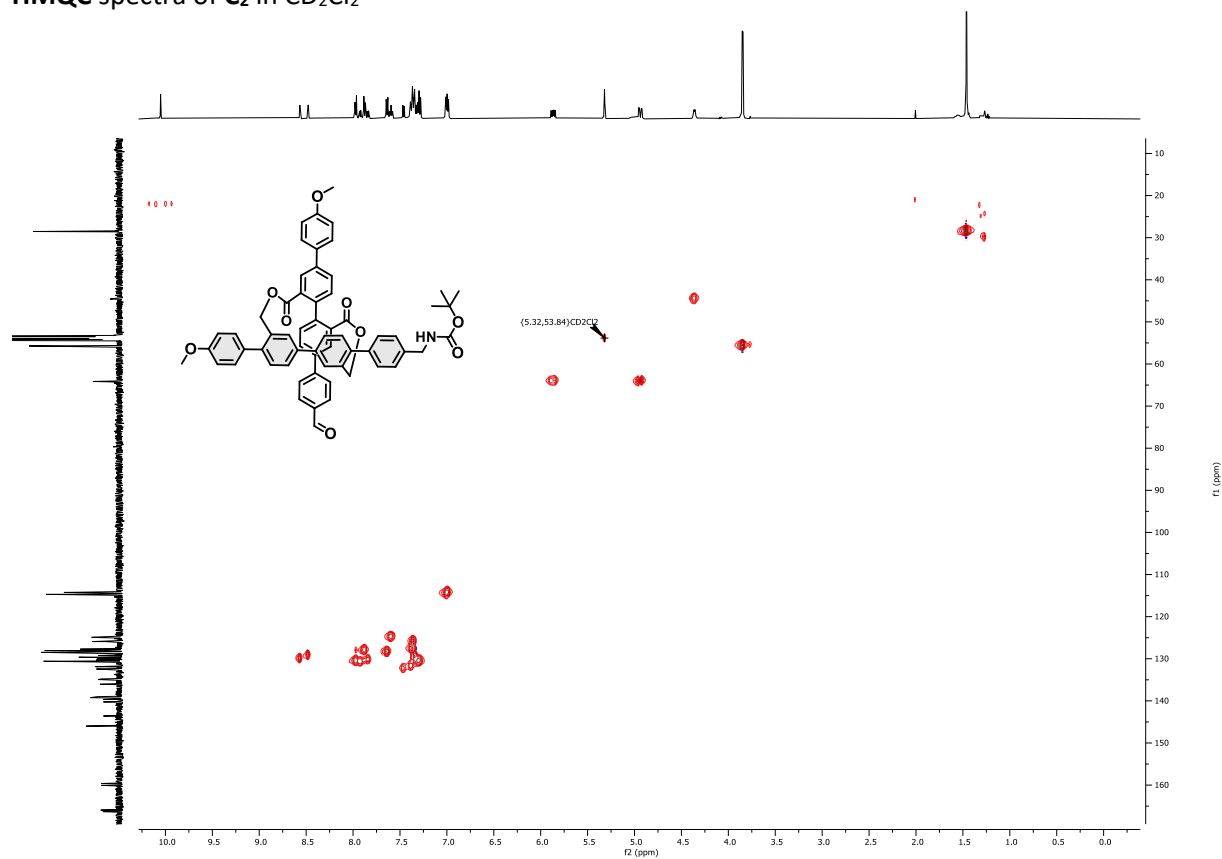

### HMBC spectra of **C**<sub>2</sub> in CD<sub>2</sub>Cl<sub>2</sub>

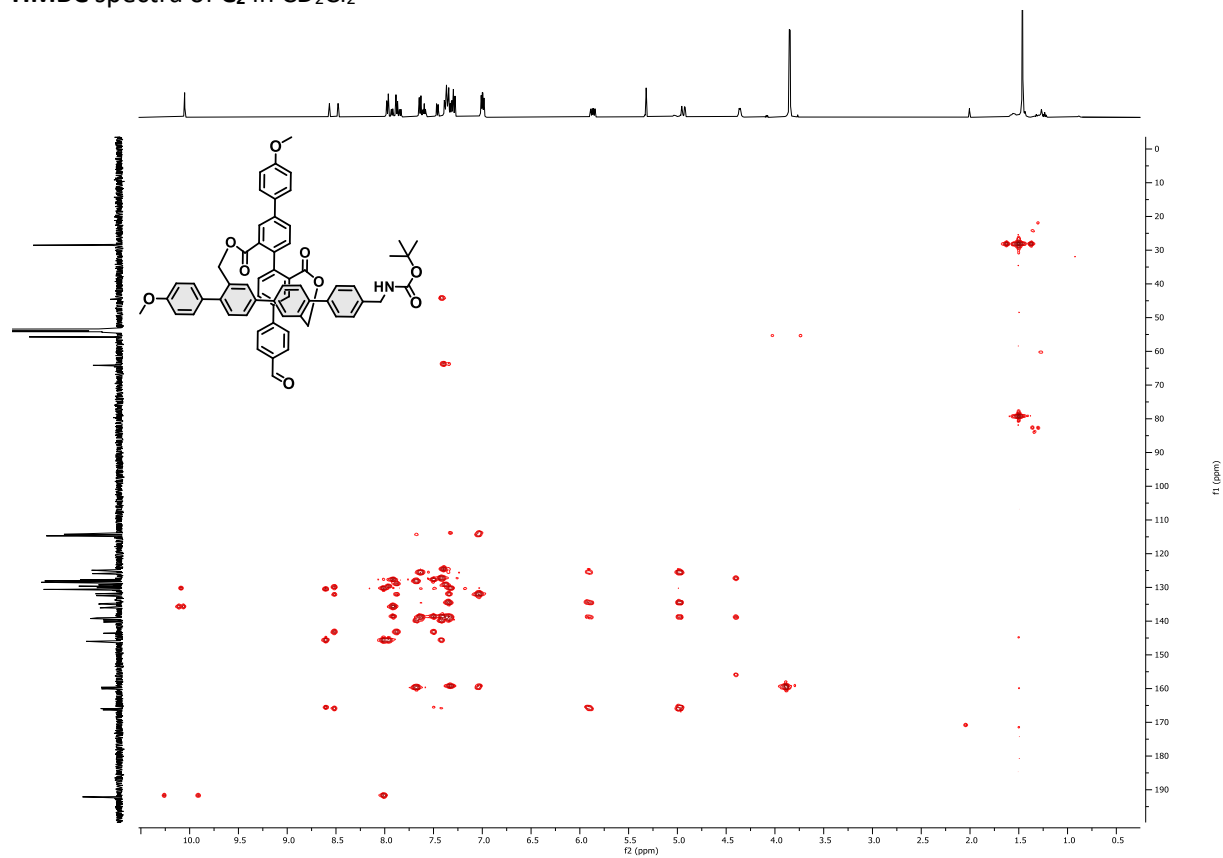

### NOESY spectra of **C**<sub>2</sub> in CD<sub>2</sub>Cl<sub>2</sub>

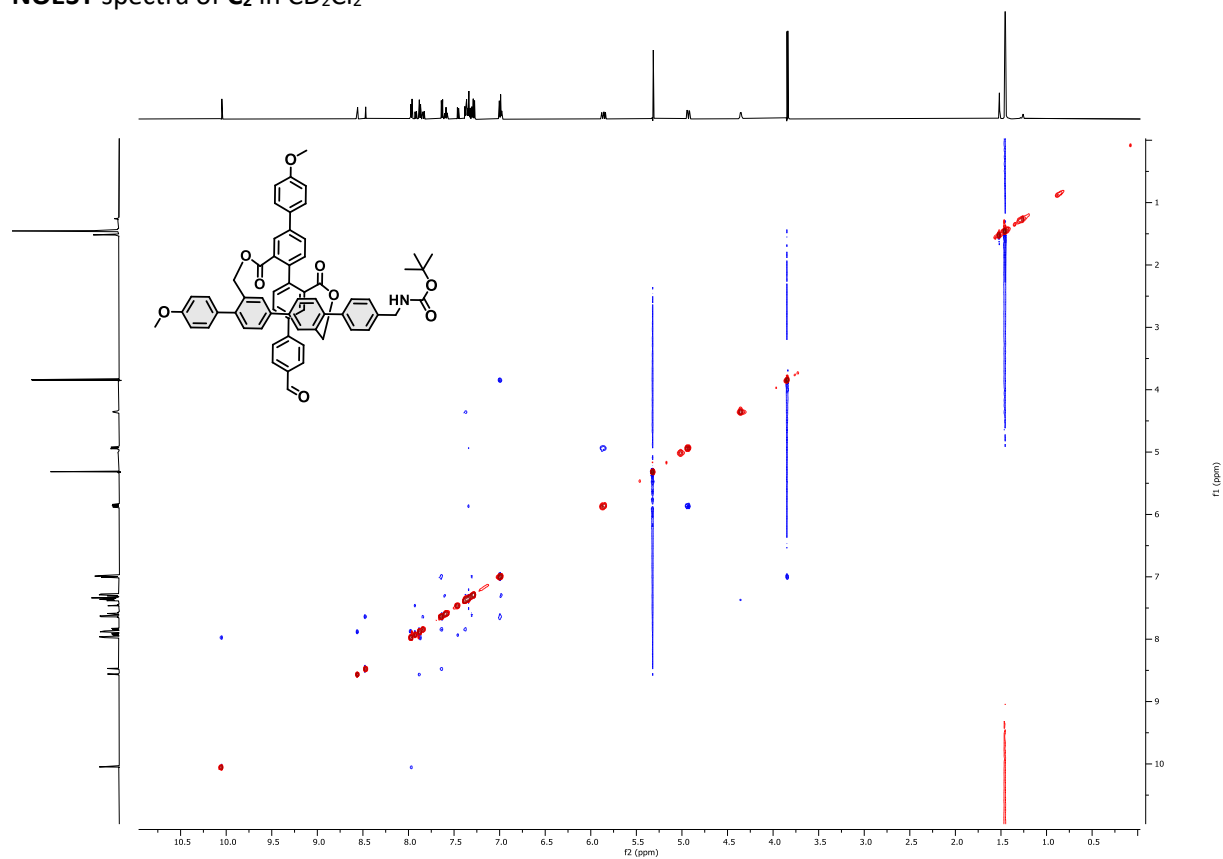

HR-ESI-MS spectra of C<sub>2</sub>

### High Resolution Mass Spectrometry Report

Sample Name **KRO 395**  
Comment

Instrument **maXis 4G**  
Method **ms\_nocolumn\_mid\_pos.m**

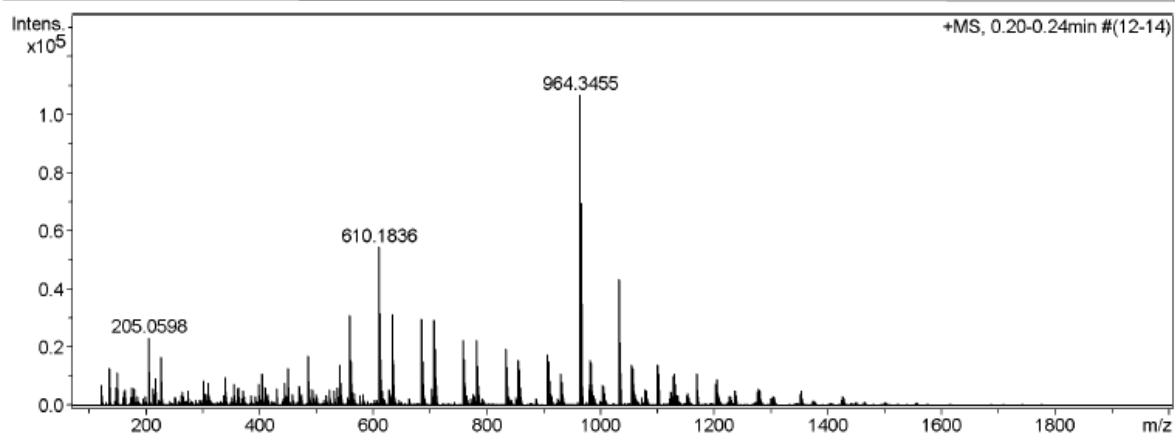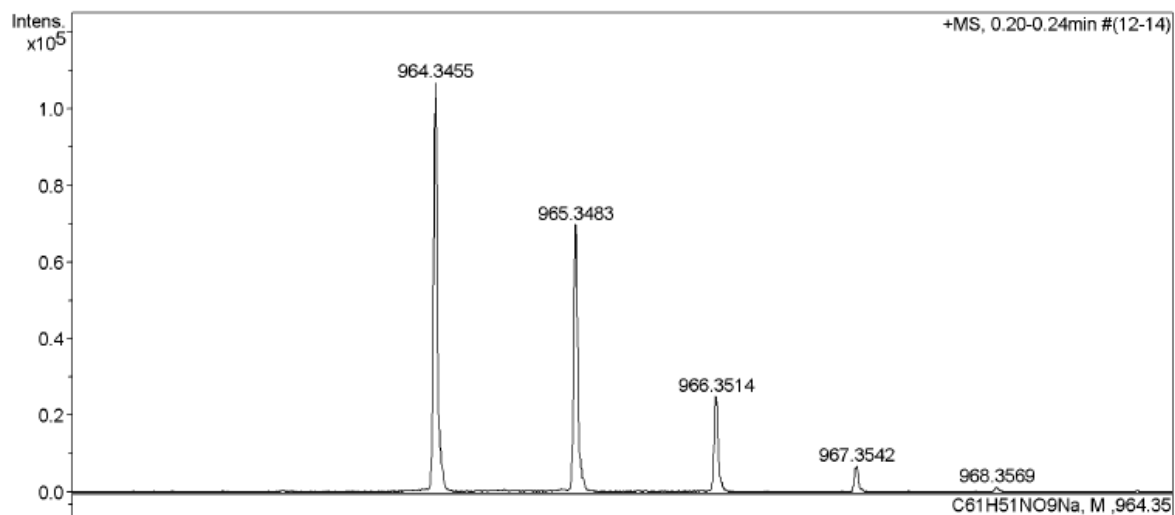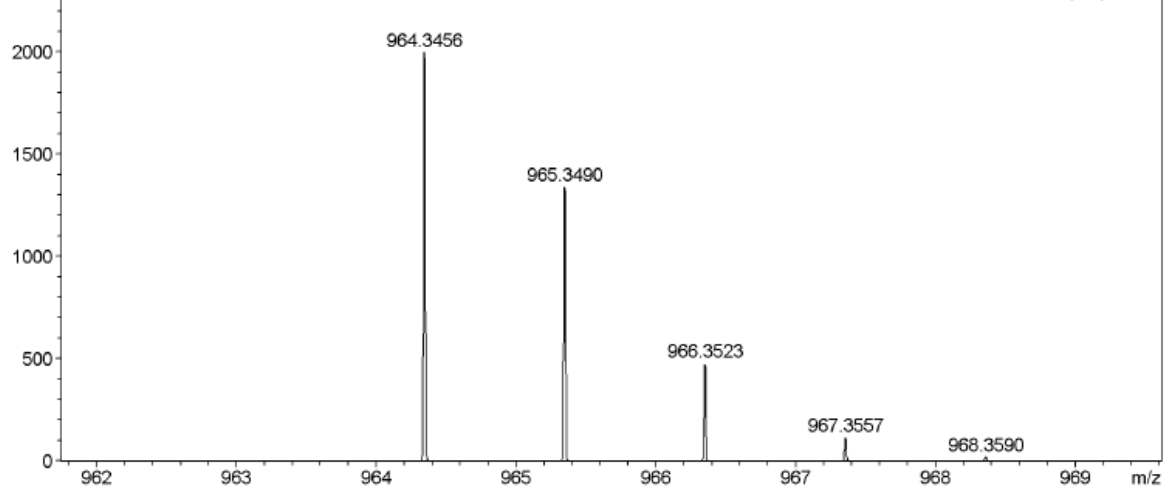

---

## High Resolution Mass Spectrometry Report

---

### Measured m/z vs. theoretical m/z

| Meas. m/z | # | Formula            | Score  | m/z      | err [mDa] | err [ppm] | mSigma | rdb  | e <sup>-</sup> Conf | z  |
|-----------|---|--------------------|--------|----------|-----------|-----------|--------|------|---------------------|----|
| 964.3455  | 1 | C 61 H 51 N Na O 9 | 100.00 | 964.3456 | 0.1       | 0.1       | 8.1    | 36.5 | even                | 1+ |

---

### Mass list

| #  | m/z      | I%   | I     |
|----|----------|------|-------|
| 1  | 122.0963 | 6.6  | 7068  |
| 2  | 136.1120 | 12.0 | 12858 |
| 3  | 147.0917 | 6.1  | 6519  |
| 4  | 150.1275 | 10.6 | 11326 |
| 5  | 175.1227 | 5.9  | 6317  |
| 6  | 205.0598 | 21.8 | 23382 |
| 7  | 212.1431 | 5.7  | 6063  |
| 8  | 217.1045 | 8.7  | 9343  |
| 9  | 226.9514 | 15.7 | 16778 |
| 10 | 301.0749 | 8.2  | 8787  |
| 11 | 309.1307 | 7.5  | 8051  |
| 12 | 339.1292 | 9.1  | 9747  |
| 13 | 355.2814 | 7.2  | 7662  |
| 14 | 361.2344 | 5.8  | 6161  |
| 15 | 362.9257 | 6.0  | 6419  |
| 16 | 399.3072 | 7.1  | 7649  |
| 17 | 405.2603 | 10.2 | 10877 |
| 18 | 411.0931 | 6.0  | 6402  |
| 19 | 443.3336 | 7.5  | 7994  |
| 20 | 449.2868 | 12.0 | 12843 |
| 21 | 469.3274 | 6.3  | 6781  |
| 22 | 485.1122 | 15.9 | 17052 |
| 23 | 486.1127 | 7.0  | 7508  |
| 24 | 487.3594 | 5.8  | 6165  |
| 25 | 536.1643 | 6.1  | 6528  |
| 26 | 541.1199 | 13.0 | 13956 |
| 27 | 542.1204 | 7.3  | 7815  |
| 28 | 559.1308 | 29.0 | 31079 |
| 29 | 560.1313 | 14.4 | 15383 |
| 30 | 561.1287 | 11.2 | 12026 |
| 31 | 610.1836 | 51.0 | 54617 |
| 32 | 611.1840 | 29.7 | 31823 |
| 33 | 612.1822 | 20.3 | 21737 |
| 34 | 613.1817 | 8.6  | 9177  |
| 35 | 633.1495 | 29.6 | 31662 |
| 36 | 634.1502 | 18.1 | 19384 |
| 37 | 635.1474 | 13.6 | 14526 |
| 38 | 684.2019 | 28.1 | 30032 |
| 39 | 685.2032 | 18.2 | 19468 |
| 40 | 685.4347 | 24.9 | 26612 |
| 41 | 686.2007 | 14.2 | 15248 |
| 42 | 686.4378 | 11.4 | 12230 |
| 43 | 687.2004 | 6.1  | 6534  |
| 44 | 707.1681 | 27.6 | 29586 |
| 45 | 708.1691 | 18.3 | 19601 |
| 46 | 709.1666 | 14.1 | 15123 |
| 47 | 710.1661 | 6.8  | 7229  |
| 48 | 758.2208 | 21.1 | 22612 |
| 49 | 759.2218 | 14.9 | 15914 |
| 50 | 760.2199 | 12.3 | 13132 |
| 51 | 761.2189 | 6.2  | 6672  |
| 52 | 781.1871 | 21.0 | 22519 |
| 53 | 782.1878 | 14.9 | 15988 |
| 54 | 783.1845 | 12.9 | 13818 |
| 55 | 784.1842 | 6.6  | 7030  |
| 56 | 832.2392 | 18.2 | 19437 |
| 57 | 833.2407 | 15.4 | 16534 |
| 58 | 834.2385 | 12.4 | 13307 |
| 59 | 835.2386 | 6.9  | 7377  |
| 60 | 855.2061 | 14.6 | 15655 |
| 61 | 856.2064 | 11.7 | 12533 |
| 62 | 857.2044 | 9.7  | 10339 |

## High Resolution Mass Spectrometry Report

| #   | m/z       | I%    | I      |
|-----|-----------|-------|--------|
| 63  | 858.2025  | 5.9   | 6362   |
| 64  | 906.2586  | 16.4  | 17526  |
| 65  | 907.2592  | 14.1  | 15099  |
| 66  | 908.2577  | 13.2  | 14109  |
| 67  | 909.2571  | 8.2   | 8768   |
| 68  | 929.2245  | 10.2  | 10880  |
| 69  | 930.2257  | 8.3   | 8908   |
| 70  | 931.2234  | 7.8   | 8330   |
| 71  | 964.3455  | 100.0 | 107022 |
| 72  | 965.3483  | 65.2  | 69813  |
| 73  | 966.3514  | 23.4  | 25046  |
| 74  | 967.3542  | 6.4   | 6817   |
| 75  | 980.2771  | 14.7  | 15785  |
| 76  | 981.2782  | 14.0  | 14980  |
| 77  | 982.2766  | 13.9  | 14872  |
| 78  | 983.2766  | 7.9   | 8434   |
| 79  | 1003.2435 | 6.7   | 7176   |
| 80  | 1004.2446 | 6.4   | 6884   |
| 81  | 1005.2418 | 6.1   | 6491   |
| 82  | 1032.3324 | 40.6  | 43455  |
| 83  | 1033.3356 | 28.3  | 30248  |
| 84  | 1034.3394 | 10.5  | 11248  |
| 85  | 1054.2968 | 11.6  | 12432  |
| 86  | 1055.2967 | 13.0  | 13938  |
| 87  | 1056.2955 | 12.2  | 13061  |
| 88  | 1057.2958 | 7.9   | 8402   |
| 89  | 1100.3200 | 13.3  | 14243  |
| 90  | 1101.3235 | 10.2  | 10921  |
| 91  | 1128.3147 | 9.5   | 10155  |
| 92  | 1129.3164 | 10.1  | 10860  |
| 93  | 1130.3149 | 10.1  | 10770  |
| 94  | 1131.3151 | 6.9   | 7433   |
| 95  | 1168.3077 | 10.3  | 11003  |
| 96  | 1169.3111 | 6.8   | 7329   |
| 97  | 1202.3350 | 6.8   | 7241   |
| 98  | 1203.3357 | 7.2   | 7682   |
| 99  | 1204.3336 | 8.5   | 9087   |
| 100 | 1205.3330 | 5.8   | 6198   |

### Acquisition Parameter

|                   |                              |                |                                       |                |              |           |
|-------------------|------------------------------|----------------|---------------------------------------|----------------|--------------|-----------|
| <b>General</b>    | Fore Vacuum                  | 3.09e+000 mBar | High Vacuum                           | 1.34e-007 mBar | Source Type  | ESI       |
|                   | Scan Begin                   | 75 m/z         | Scan End                              | 2000 m/z       | Ion Polarity | Positive  |
| <b>Source</b>     | Set Nebulizer                | 2.0 Bar        | Set Capillary                         | 4500 V         | Set Dry Gas  | 8.0 l/min |
|                   | Set Dry Heater               | 200 °C         | Set End Plate Offset                  | -500 V         |              |           |
| <b>Quadrupole</b> | Set Ion Energy ( MS only )   | 4.0 eV         |                                       |                |              |           |
| <b>Coll. Cell</b> | Collision Energy             | 8.0 eV         | Set Collision Cell RF                 | 600.0 Vpp      |              | 100.0 Vpp |
| <b>Ion Cooler</b> | Set Ion Cooler Transfer Time | 75.0 µs        | Set Ion Cooler Pre Pulse Storage Time |                |              | 10.0 µs   |



<sup>1</sup>H-NMR spectra of C<sub>M</sub> in CD<sub>2</sub>Cl<sub>2</sub>/TFA-d (10:1)

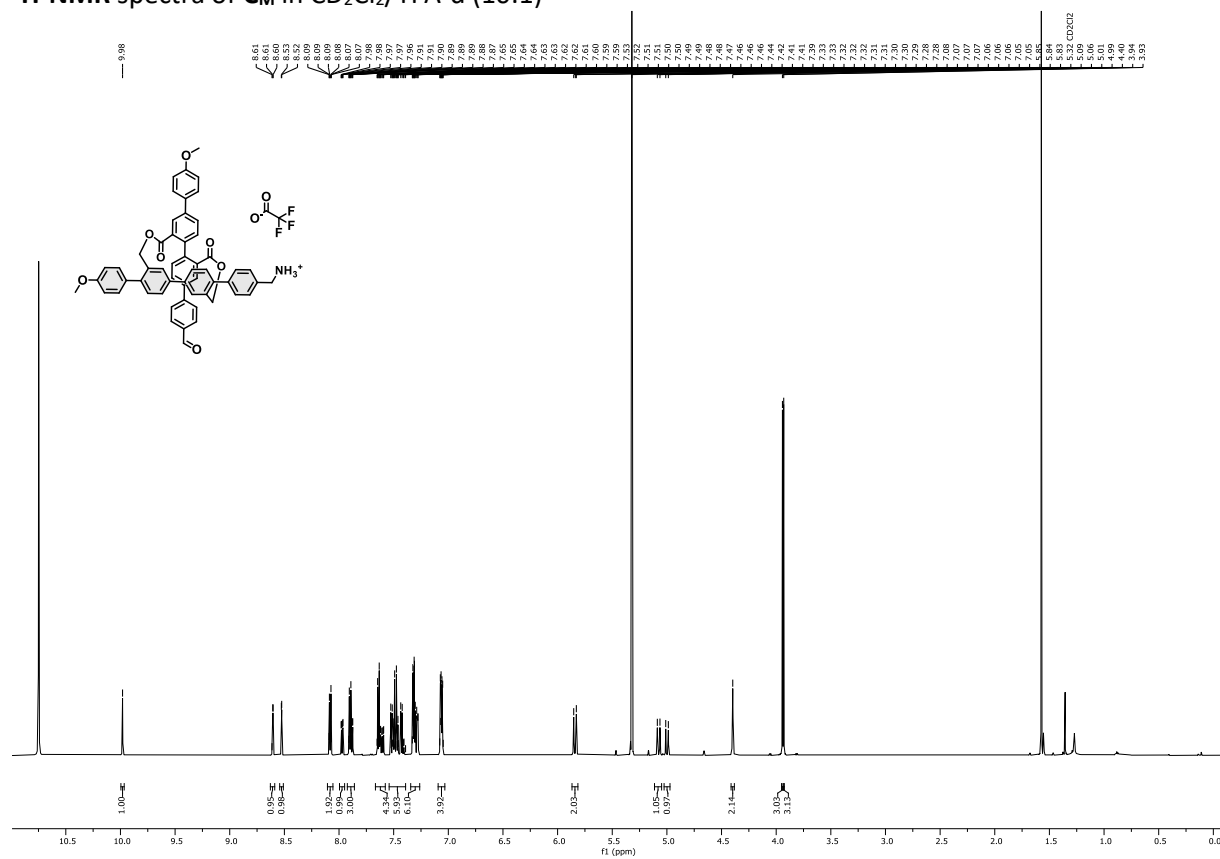

<sup>1</sup>H-NMR spectra of C<sub>M</sub> in DMSO-d<sub>6</sub>

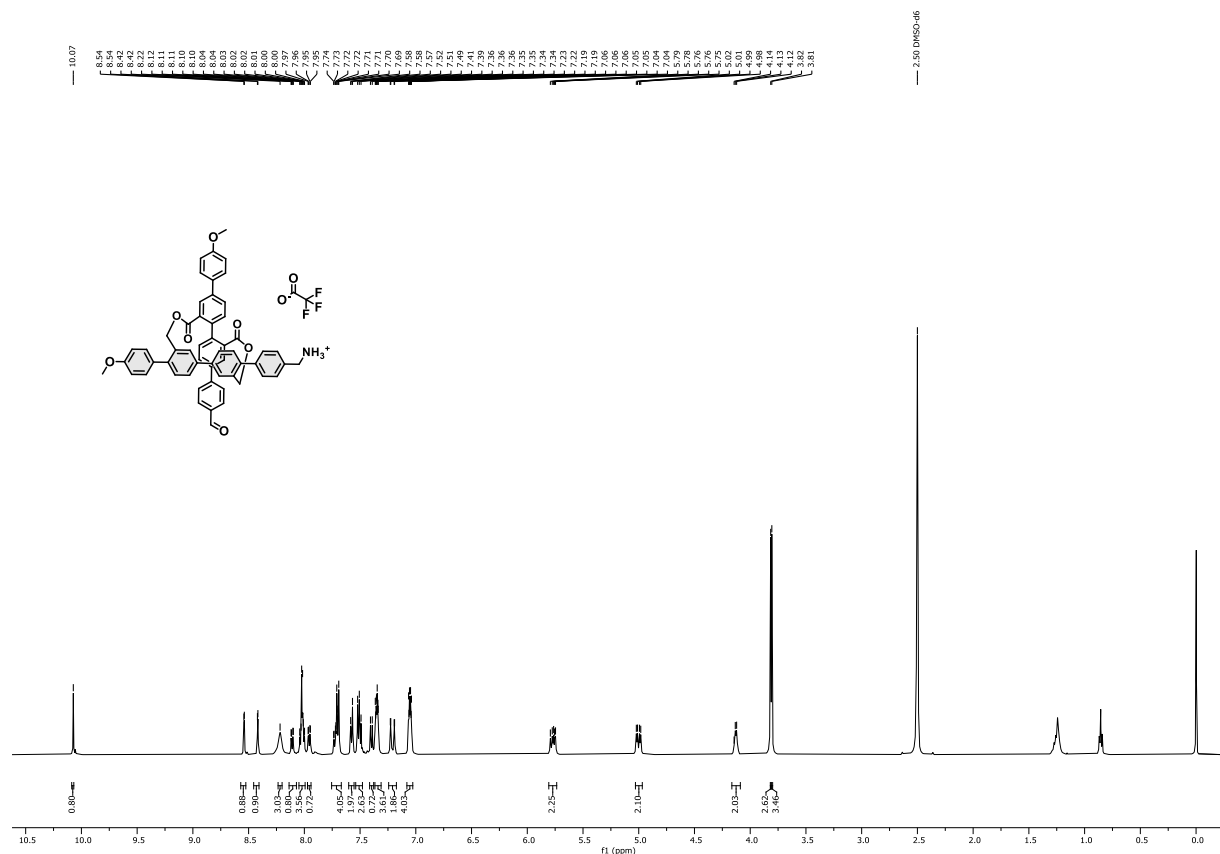

# <sup>13</sup>C-NMR spectra of C<sub>M</sub> in DMSO-d<sub>6</sub>

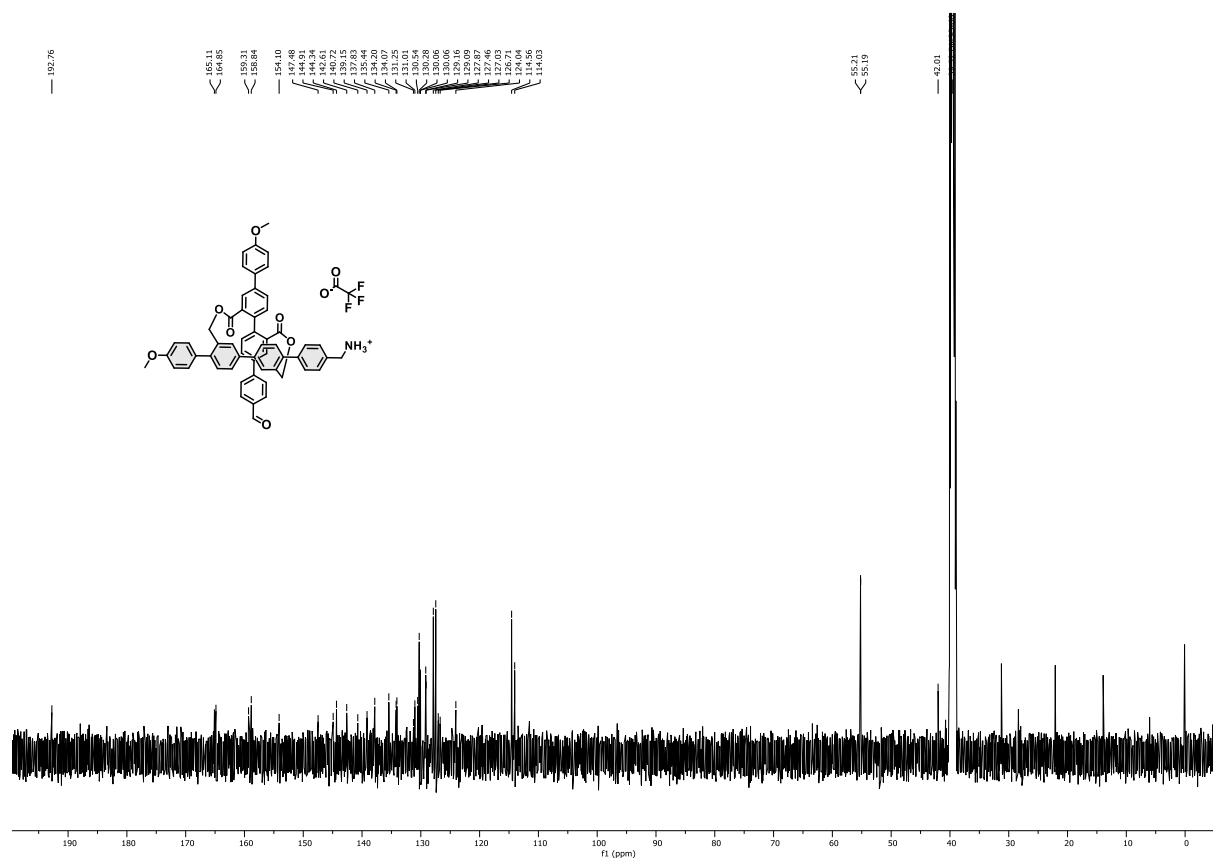

# COSY spectra of C<sub>M</sub> in DMSO-d<sub>6</sub>

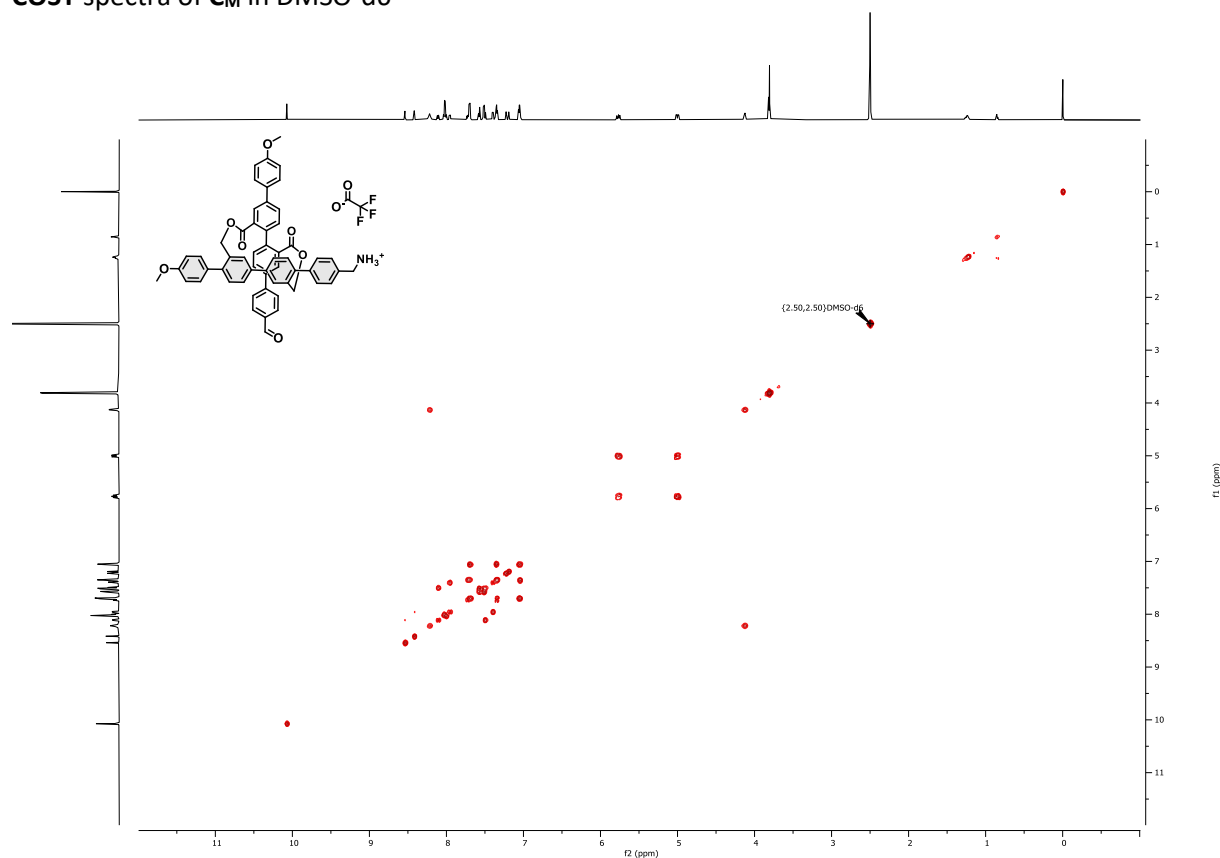

### HMQC spectra of $C_M$ in DMSO-d6

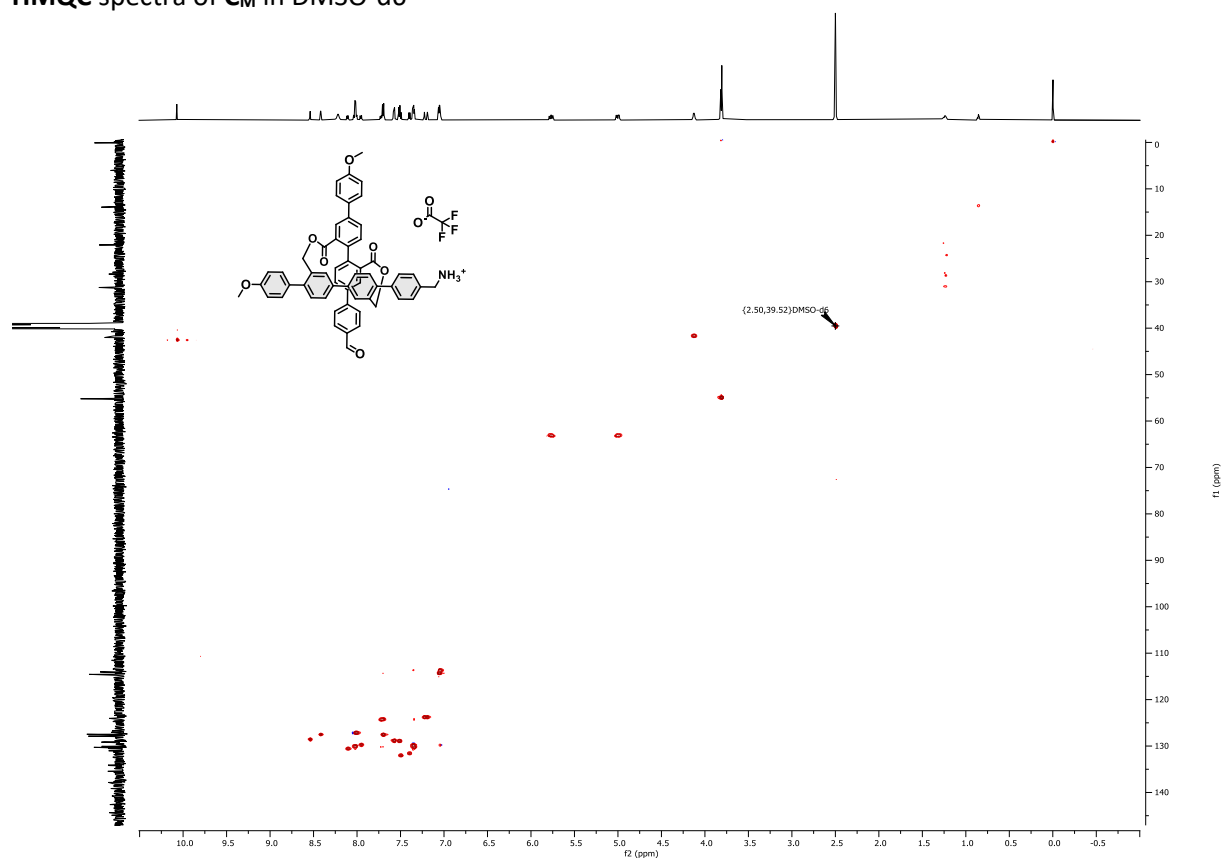

### HMBC spectra of $C_M$ in DMSO-d6

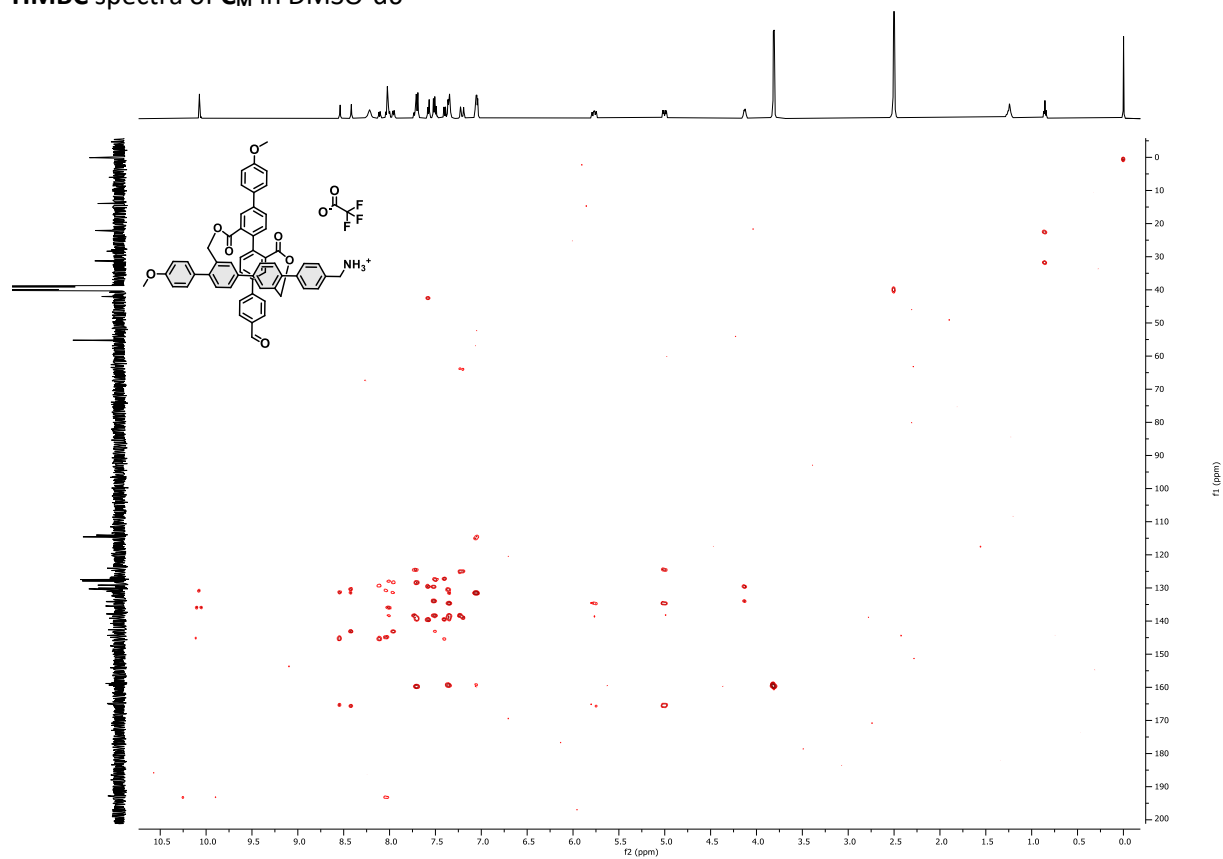

NOESY spectra of  $C_M$  in DMSO-d6

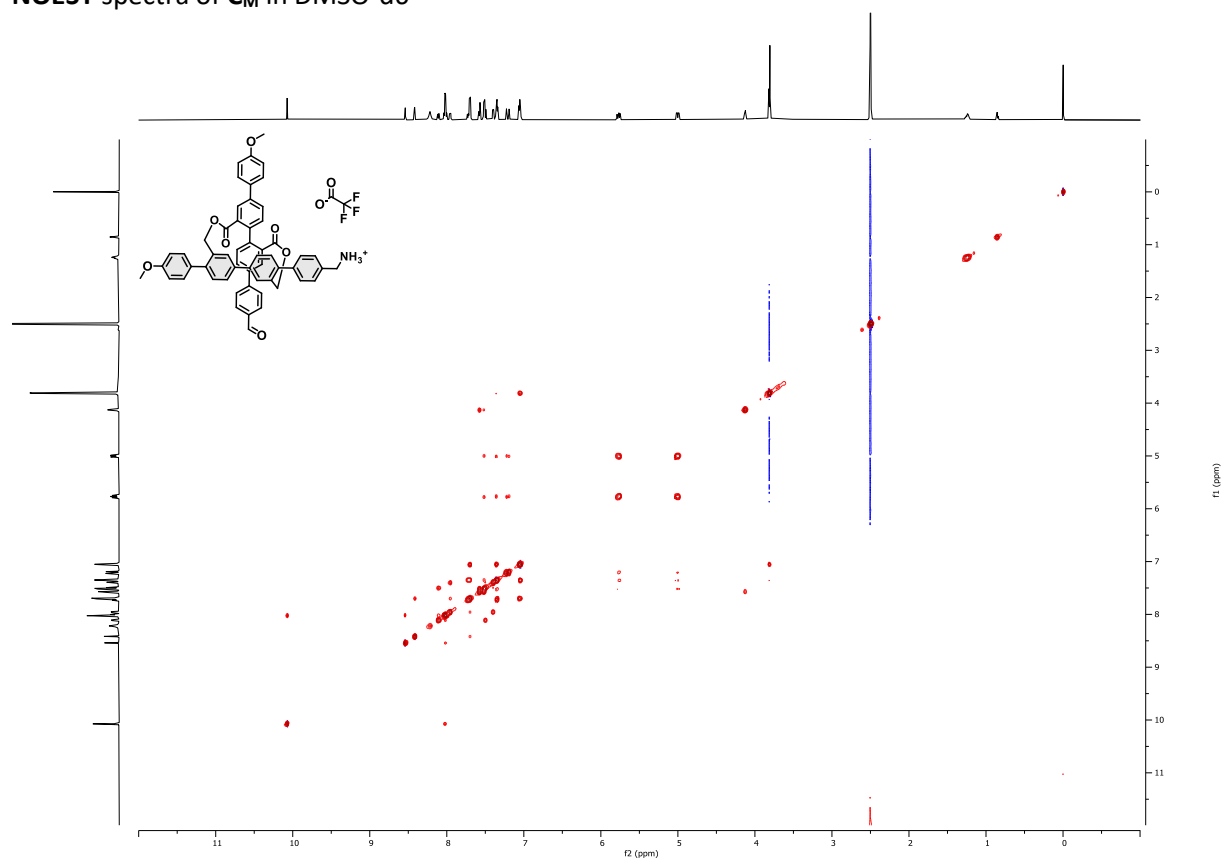

HR-ESI-MS spectra of C<sub>M</sub>

High Resolution Mass Spectrometry Report

Sample Name KRO382  
Comment

Instrument maXis 4G  
Method ms\_nocolumn\_high\_pos\_use\_acn.m

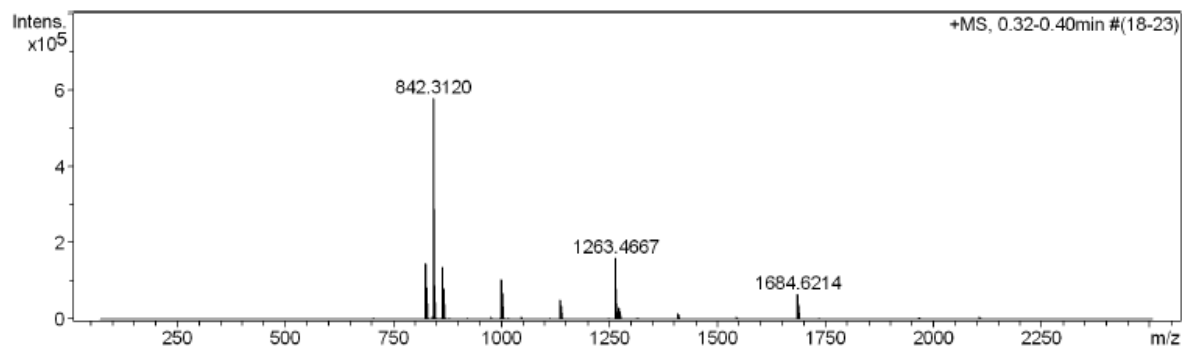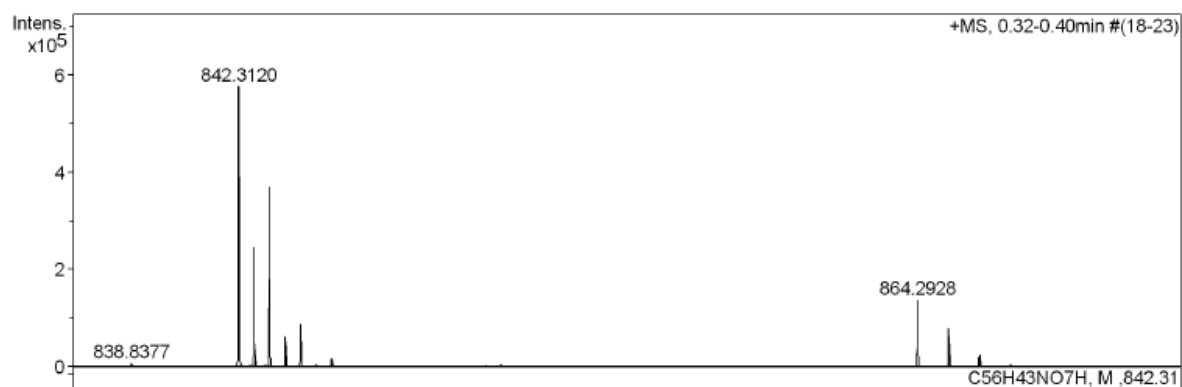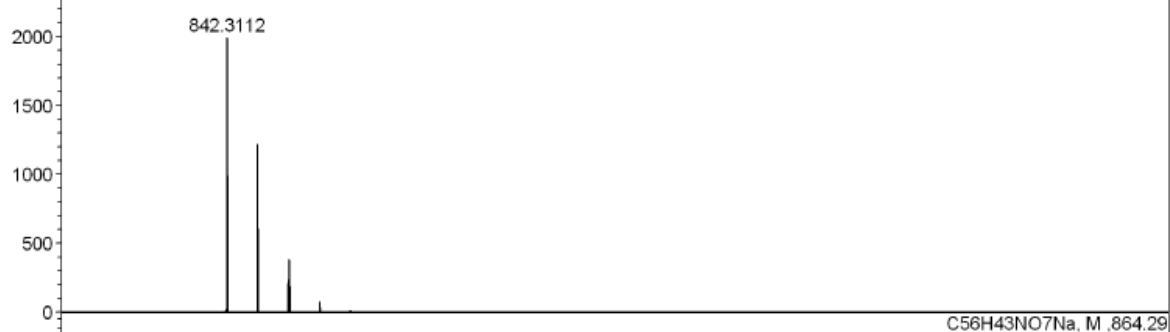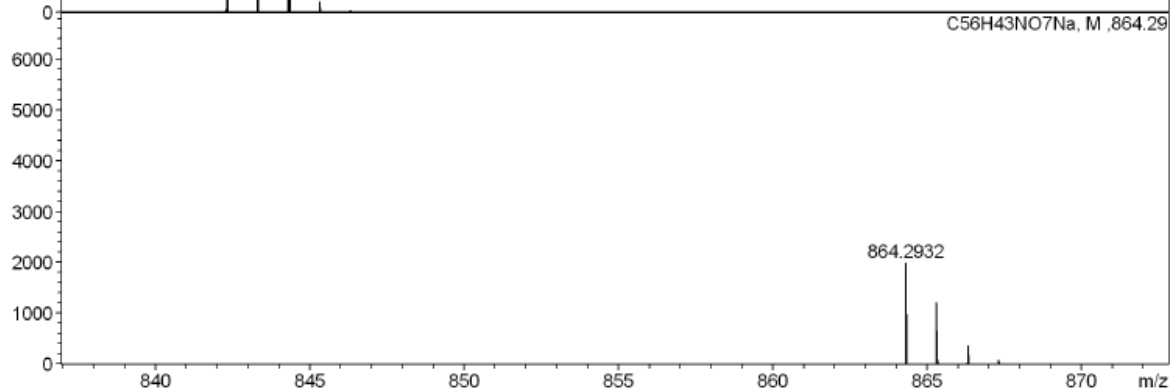

# High Resolution Mass Spectrometry Report

## Measured m/z vs. theoretical m/z

| Meas. m/z | # | Formula            | Score  | m/z      | err [mDa] | err [ppm] | mSigma | rdb  | e <sup>-</sup> Conf | z  |
|-----------|---|--------------------|--------|----------|-----------|-----------|--------|------|---------------------|----|
| 842.3120  | 1 | C 56 H 44 N O 7    | 100.00 | 842.3112 | -0.7      | -0.9      | 25.4   | 35.5 | even                | 1+ |
| 864.2928  | 1 | C 56 H 43 N Na O 7 | 100.00 | 864.2932 | 0.3       | 0.4       | 15.3   | 35.5 | even                |    |

## Mass list

| #  | m/z       | I %   | I      |
|----|-----------|-------|--------|
| 1  | 702.8630  | 0.5   | 2754   |
| 2  | 707.1672  | 0.3   | 1965   |
| 3  | 825.2845  | 25.1  | 144763 |
| 4  | 826.2875  | 14.3  | 82742  |
| 5  | 827.2906  | 4.6   | 26355  |
| 6  | 828.2935  | 1.1   | 6533   |
| 7  | 838.8377  | 1.3   | 7601   |
| 8  | 842.3120  | 100.0 | 577364 |
| 9  | 842.6740  | 0.3   | 1993   |
| 10 | 842.8135  | 43.0  | 248013 |
| 11 | 843.1496  | 0.4   | 2125   |
| 12 | 843.1635  | 0.4   | 2155   |
| 13 | 843.2073  | 0.4   | 2255   |
| 14 | 843.3151  | 64.3  | 371024 |
| 15 | 843.8162  | 11.0  | 63766  |
| 16 | 844.3174  | 15.4  | 88831  |
| 17 | 844.8181  | 1.1   | 6256   |
| 18 | 845.3199  | 2.8   | 16223  |
| 19 | 846.3234  | 0.5   | 3167   |
| 20 | 850.3088  | 0.7   | 3863   |
| 21 | 850.8102  | 0.7   | 4323   |
| 22 | 851.3122  | 0.5   | 3149   |
| 23 | 858.3055  | 0.5   | 2892   |
| 24 | 864.2928  | 24.0  | 138314 |
| 25 | 865.2959  | 13.9  | 80481  |
| 26 | 866.2987  | 4.5   | 26127  |
| 27 | 867.3018  | 1.1   | 6380   |
| 28 | 880.2686  | 0.6   | 3418   |
| 29 | 881.2748  | 0.3   | 2009   |
| 30 | 920.3567  | 0.4   | 2462   |
| 31 | 974.8130  | 1.0   | 5770   |
| 32 | 996.3891  | 0.5   | 2605   |
| 33 | 997.3914  | 0.4   | 2167   |
| 34 | 1000.2680 | 18.3  | 105900 |
| 35 | 1001.2710 | 11.9  | 68476  |
| 36 | 1002.2736 | 4.0   | 22979  |
| 37 | 1003.2757 | 0.9   | 5368   |
| 38 | 1016.2437 | 0.4   | 2491   |
| 39 | 1046.4432 | 1.1   | 6185   |
| 40 | 1047.4454 | 0.7   | 4178   |
| 41 | 1096.4976 | 0.4   | 2029   |
| 42 | 1110.7875 | 0.7   | 4074   |
| 43 | 1136.2425 | 9.1   | 52707  |
| 44 | 1137.2456 | 6.2   | 36077  |
| 45 | 1138.2490 | 2.2   | 12904  |
| 46 | 1139.2525 | 0.6   | 3254   |
| 47 | 1204.2304 | 0.4   | 2126   |
| 48 | 1246.7626 | 0.4   | 2516   |
| 49 | 1262.9644 | 14.1  | 81614  |
| 50 | 1263.4667 | 27.6  | 159571 |
| 51 | 1263.9684 | 25.2  | 145521 |
| 52 | 1264.4696 | 16.1  | 92686  |
| 53 | 1264.9709 | 7.3   | 42390  |
| 54 | 1265.4719 | 2.9   | 16733  |
| 55 | 1265.9739 | 1.1   | 6416   |
| 56 | 1270.9598 | 0.5   | 3031   |
| 57 | 1271.4631 | 0.8   | 4397   |
| 58 | 1271.9642 | 0.7   | 3840   |
| 59 | 1272.2176 | 5.5   | 31745  |
| 60 | 1272.4653 | 0.4   | 2562   |
| 61 | 1273.2211 | 3.6   | 21068  |

## High Resolution Mass Spectrometry Report

| #   | m/z       | I%   | I     |
|-----|-----------|------|-------|
| 62  | 1274.2243 | 1.5  | 8577  |
| 63  | 1275.2265 | 0.4  | 2422  |
| 64  | 1312.9933 | 0.4  | 2260  |
| 65  | 1313.4945 | 0.7  | 4158  |
| 66  | 1313.9960 | 0.7  | 4261  |
| 67  | 1314.4975 | 0.5  | 2858  |
| 68  | 1408.1921 | 2.8  | 16377 |
| 69  | 1409.1953 | 2.1  | 12180 |
| 70  | 1410.1980 | 0.8  | 4869  |
| 71  | 1544.1669 | 1.0  | 5949  |
| 72  | 1545.1698 | 0.7  | 4273  |
| 73  | 1683.6161 | 4.4  | 25125 |
| 74  | 1683.9522 | 0.4  | 2566  |
| 75  | 1684.1192 | 7.1  | 41034 |
| 76  | 1684.2865 | 0.6  | 3634  |
| 77  | 1684.6214 | 11.3 | 65126 |
| 78  | 1684.9560 | 0.8  | 4346  |
| 79  | 1685.1230 | 7.3  | 42182 |
| 80  | 1685.2902 | 0.6  | 3623  |
| 81  | 1685.6246 | 6.1  | 35312 |
| 82  | 1686.1252 | 2.4  | 13869 |
| 83  | 1686.6261 | 1.5  | 8925  |
| 84  | 1687.1264 | 0.4  | 2424  |
| 85  | 1687.6283 | 0.3  | 1931  |
| 86  | 1692.6163 | 0.4  | 2049  |
| 87  | 1706.6011 | 0.4  | 2256  |
| 88  | 1734.1459 | 0.3  | 1934  |
| 89  | 1734.6479 | 0.4  | 2436  |
| 90  | 1735.1497 | 0.4  | 2188  |
| 91  | 1964.7217 | 0.5  | 2719  |
| 92  | 1965.0566 | 0.6  | 3717  |
| 93  | 1965.3906 | 0.7  | 3848  |
| 94  | 1965.7240 | 0.6  | 3344  |
| 95  | 1966.0601 | 0.4  | 2391  |
| 96  | 2104.7698 | 0.5  | 2779  |
| 97  | 2105.2736 | 0.8  | 4568  |
| 98  | 2105.7754 | 0.9  | 5380  |
| 99  | 2106.2752 | 0.7  | 3813  |
| 100 | 2106.7790 | 0.4  | 2467  |

### Acquisition Parameter

|            |                              |                |                                       |                |              |           |
|------------|------------------------------|----------------|---------------------------------------|----------------|--------------|-----------|
| General    | Fore Vacuum                  | 3.08e+000 mBar | High Vacuum                           | 1.05e-007 mBar | Source Type  | ESI       |
|            | Scan Begin                   | 75 m/z         | Scan End                              | 2500 m/z       | Ion Polarity | Positive  |
| Source     | Set Nebulizer                | 2.0 Bar        | Set Capillary                         | 4500 V         | Set Dry Gas  | 8.0 l/min |
|            | Set Dry Heater               | 200 °C         | Set End Plate Offset                  | -500 V         |              |           |
| Quadrupole | Set Ion Energy ( MS only )   | 4.0 eV         |                                       |                |              |           |
| Coll. Cell | Collision Energy             | 12.0 eV        | Set Collision Cell RF                 | 2000.0 Vpp     |              | 800.0 Vpp |
| Ion Cooler | Set Ion Cooler Transfer Time | 120.0 μs       | Set Ion Cooler Pre Pulse Storage Time |                |              | 18.0 μs   |

### <sup>1</sup>H-NMR spectra of I in CD<sub>2</sub>Cl<sub>2</sub>

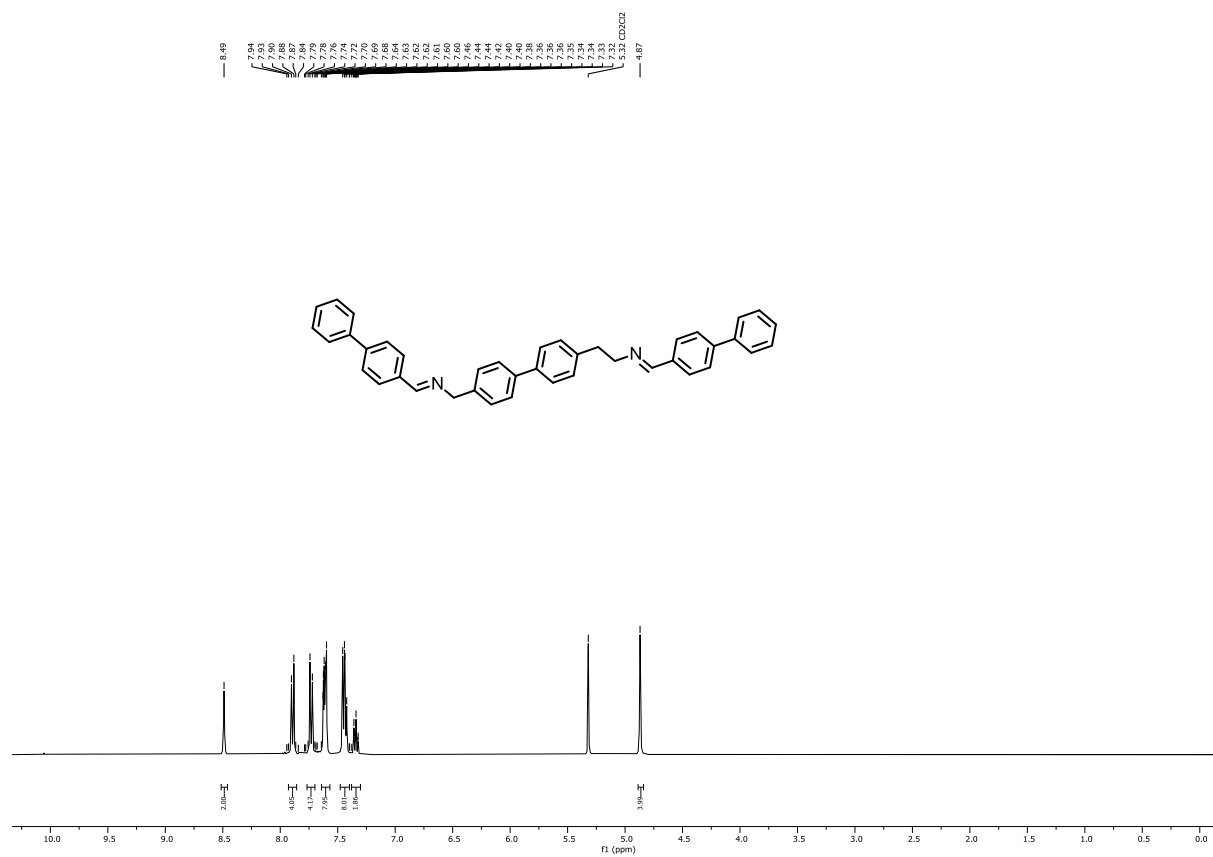

### <sup>13</sup>C-NMR spectra of I in CD<sub>2</sub>Cl<sub>2</sub>

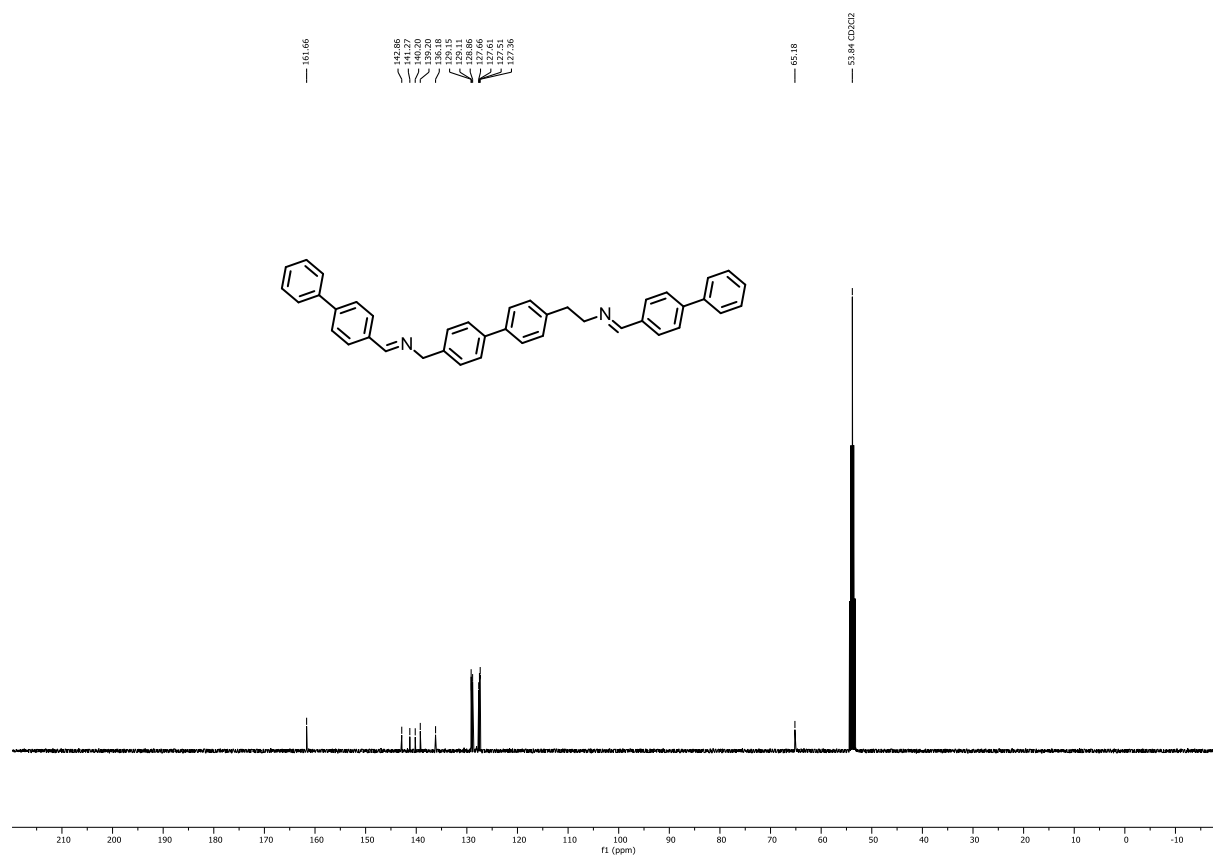



# HR-ESI-MS spectra of I

## High Resolution Mass Spectrometry Report

Sample Name **KRO195**  
Comment

Instrument maXis 4G  
Method ms\_nocolumn\_mid\_pos.m

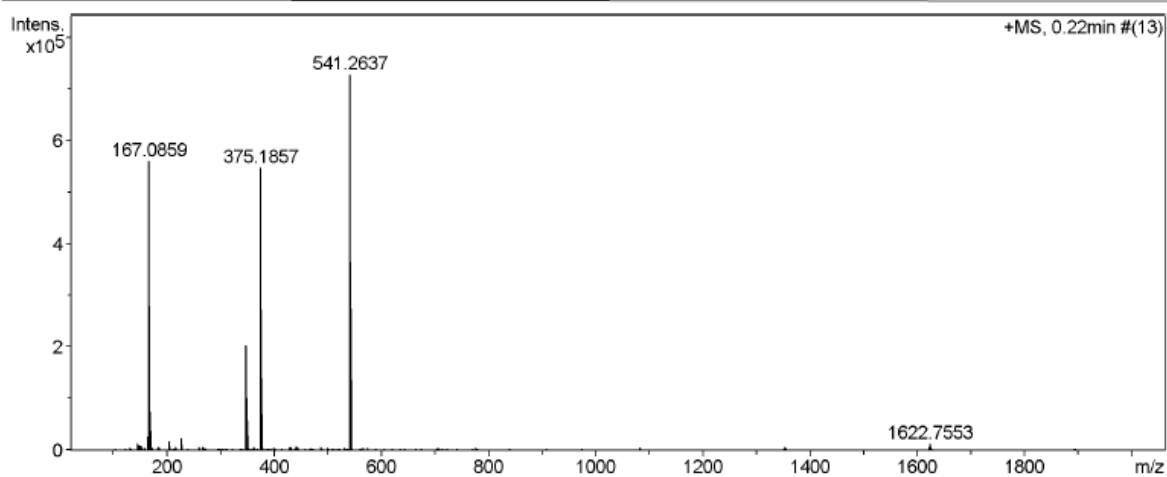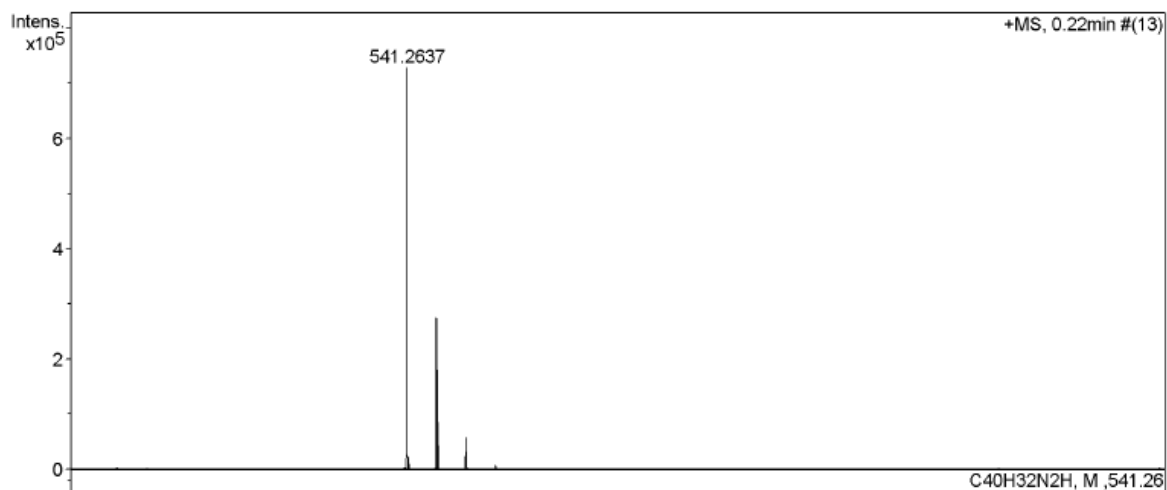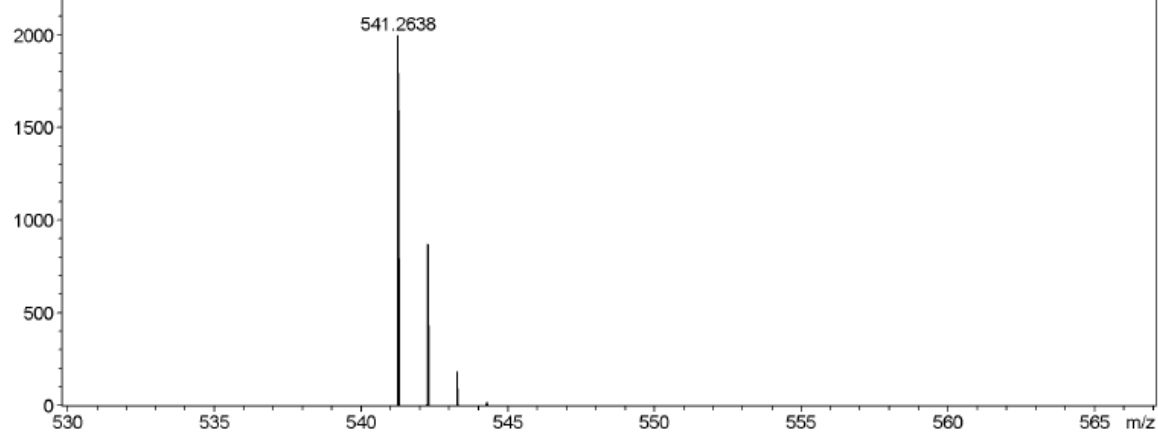

---

## High Resolution Mass Spectrometry Report

---

### Measured m/z vs. theoretical m/z

| Meas. m/z | # | Formula       | Score  | m/z      | err [mDa] | err [ppm] | mSigma | rdb  | e <sup>-</sup> Conf | z  |
|-----------|---|---------------|--------|----------|-----------|-----------|--------|------|---------------------|----|
| 541.2637  | 1 | C 40 H 33 N 2 | 100.00 | 541.2638 | 0.2       | 0.3       | 33.5   | 25.5 | even                | 1+ |

### Mass list

| #  | m/z      | I %  | I      |
|----|----------|------|--------|
| 1  | 103.9553 | 0.3  | 2432   |
| 2  | 121.9662 | 0.3  | 2298   |
| 3  | 131.9621 | 0.8  | 5808   |
| 4  | 133.9603 | 0.4  | 3076   |
| 5  | 144.9821 | 1.8  | 13201  |
| 6  | 146.9804 | 0.9  | 6497   |
| 7  | 147.9312 | 1.3  | 9824   |
| 8  | 149.9306 | 1.2  | 8955   |
| 9  | 152.0620 | 1.1  | 8217   |
| 10 | 158.9640 | 0.6  | 4059   |
| 11 | 165.0698 | 3.6  | 26336  |
| 12 | 166.0758 | 0.9  | 6273   |
| 13 | 167.0859 | 76.9 | 560662 |
| 14 | 168.0889 | 10.4 | 75474  |
| 15 | 169.0924 | 0.8  | 5538   |
| 16 | 173.0784 | 0.7  | 5294   |
| 17 | 183.0781 | 0.4  | 2598   |
| 18 | 184.1114 | 0.6  | 4071   |
| 19 | 185.1146 | 0.9  | 6314   |
| 20 | 205.0597 | 2.5  | 17887  |
| 21 | 215.1248 | 0.5  | 3405   |
| 22 | 217.1047 | 0.9  | 6615   |
| 23 | 226.9510 | 3.3  | 24296  |
| 24 | 260.2001 | 1.1  | 7773   |
| 25 | 261.1303 | 0.4  | 2580   |
| 26 | 265.9620 | 0.9  | 6556   |
| 27 | 271.1147 | 0.3  | 2382   |
| 28 | 271.1355 | 0.8  | 5888   |
| 29 | 273.1663 | 0.3  | 2236   |
| 30 | 294.9383 | 0.4  | 2880   |
| 31 | 302.9818 | 0.5  | 3385   |
| 32 | 337.2348 | 0.4  | 2926   |
| 33 | 341.2650 | 0.3  | 2306   |
| 34 | 348.1744 | 28.1 | 204766 |
| 35 | 349.1774 | 8.2  | 59684  |
| 36 | 350.1802 | 1.0  | 7466   |
| 37 | 350.2659 | 2.6  | 19290  |
| 38 | 351.2693 | 0.6  | 4326   |
| 39 | 355.2810 | 0.5  | 3404   |
| 40 | 362.9256 | 1.0  | 7563   |
| 41 | 369.2975 | 0.3  | 2508   |
| 42 | 375.1857 | 75.1 | 547173 |
| 43 | 376.1703 | 11.8 | 86337  |
| 44 | 376.1877 | 19.4 | 141024 |
| 45 | 377.1732 | 3.7  | 26702  |
| 46 | 377.1895 | 2.8  | 20487  |
| 47 | 378.1760 | 0.6  | 4264   |
| 48 | 385.2922 | 0.5  | 3608   |
| 49 | 394.2554 | 0.4  | 2582   |
| 50 | 399.3069 | 0.7  | 5405   |
| 51 | 413.3230 | 0.5  | 3428   |
| 52 | 429.3178 | 0.6  | 4100   |
| 53 | 430.9130 | 1.0  | 7557   |
| 54 | 441.2962 | 0.8  | 5992   |
| 55 | 443.3331 | 1.0  | 7116   |
| 56 | 457.3488 | 0.5  | 3600   |
| 57 | 467.3158 | 0.5  | 3595   |
| 58 | 469.9236 | 0.4  | 2652   |
| 59 | 473.3434 | 0.5  | 3776   |
| 60 | 487.3592 | 0.9  | 6292   |
| 61 | 498.9003 | 0.6  | 4541   |
| 62 | 501.3745 | 0.5  | 3632   |

## High Resolution Mass Spectrometry Report

| #   | m/z       | I%    | I      |
|-----|-----------|-------|--------|
| 63  | 506.9442  | 0.4   | 2984   |
| 64  | 517.3712  | 0.4   | 3250   |
| 65  | 523.3227  | 0.3   | 2302   |
| 66  | 531.3861  | 0.7   | 4796   |
| 67  | 541.2637  | 100.0 | 728684 |
| 68  | 542.2666  | 37.9  | 275902 |
| 69  | 543.2693  | 8.1   | 58802  |
| 70  | 544.2725  | 1.1   | 7832   |
| 71  | 545.4017  | 0.4   | 2697   |
| 72  | 566.8876  | 0.6   | 4244   |
| 73  | 575.4111  | 0.6   | 4014   |
| 74  | 619.4368  | 0.3   | 2441   |
| 75  | 634.8753  | 0.5   | 3634   |
| 76  | 702.8617  | 0.5   | 3658   |
| 77  | 705.5793  | 0.6   | 4070   |
| 78  | 721.5755  | 0.4   | 2634   |
| 79  | 770.8493  | 0.3   | 2463   |
| 80  | 776.2606  | 0.6   | 4724   |
| 81  | 777.2617  | 0.5   | 3362   |
| 82  | 778.2578  | 0.3   | 2391   |
| 83  | 838.8346  | 0.3   | 2456   |
| 84  | 1081.5133 | 0.5   | 3911   |
| 85  | 1082.5146 | 0.4   | 3206   |
| 86  | 1351.6315 | 0.5   | 3321   |
| 87  | 1352.1370 | 0.9   | 6817   |
| 88  | 1352.6357 | 0.9   | 6830   |
| 89  | 1353.1362 | 0.8   | 5836   |
| 90  | 1353.6404 | 0.4   | 3233   |
| 91  | 1621.7534 | 0.6   | 4624   |
| 92  | 1622.2550 | 1.0   | 7513   |
| 93  | 1622.7553 | 1.8   | 13108  |
| 94  | 1623.2581 | 1.2   | 8452   |
| 95  | 1623.7594 | 1.1   | 8017   |
| 96  | 1624.2633 | 0.5   | 3549   |
| 97  | 1624.7618 | 0.3   | 2232   |
| 98  | 1892.8765 | 0.4   | 2908   |
| 99  | 1893.3703 | 0.3   | 2311   |
| 100 | 1893.8781 | 0.3   | 2190   |

### Acquisition Parameter

|                   |                              |                |                                       |                |              |           |
|-------------------|------------------------------|----------------|---------------------------------------|----------------|--------------|-----------|
| <b>General</b>    | Fore Vacuum                  | 3.46e+000 mBar | High Vacuum                           | 1.14e-007 mBar | Source Type  | ESI       |
|                   | Scan Begin                   | 75 m/z         | Scan End                              | 2000 m/z       | Ion Polarity | Positive  |
| <b>Source</b>     | Set Nebulizer                | 2.0 Bar        | Set Capillary                         | 4500 V         | Set Dry Gas  | 8.0 l/min |
|                   | Set Dry Heater               | 200 °C         | Set End Plate Offset                  | -500 V         |              |           |
| <b>Quadrupole</b> | Set Ion Energy ( MS only )   | 4.0 eV         |                                       |                |              |           |
| <b>Coll. Cell</b> | Collision Energy             | 8.0 eV         | Set Collision Cell RF                 | 600.0 Vpp      |              | 100.0 Vpp |
| <b>Ion Cooler</b> | Set Ion Cooler Transfer Time | 75.0 µs        | Set Ion Cooler Pre Pulse Storage Time |                |              | 10.0 µs   |

**<sup>1</sup>H-NMR spectra of A in CD<sub>2</sub>Cl<sub>2</sub>**

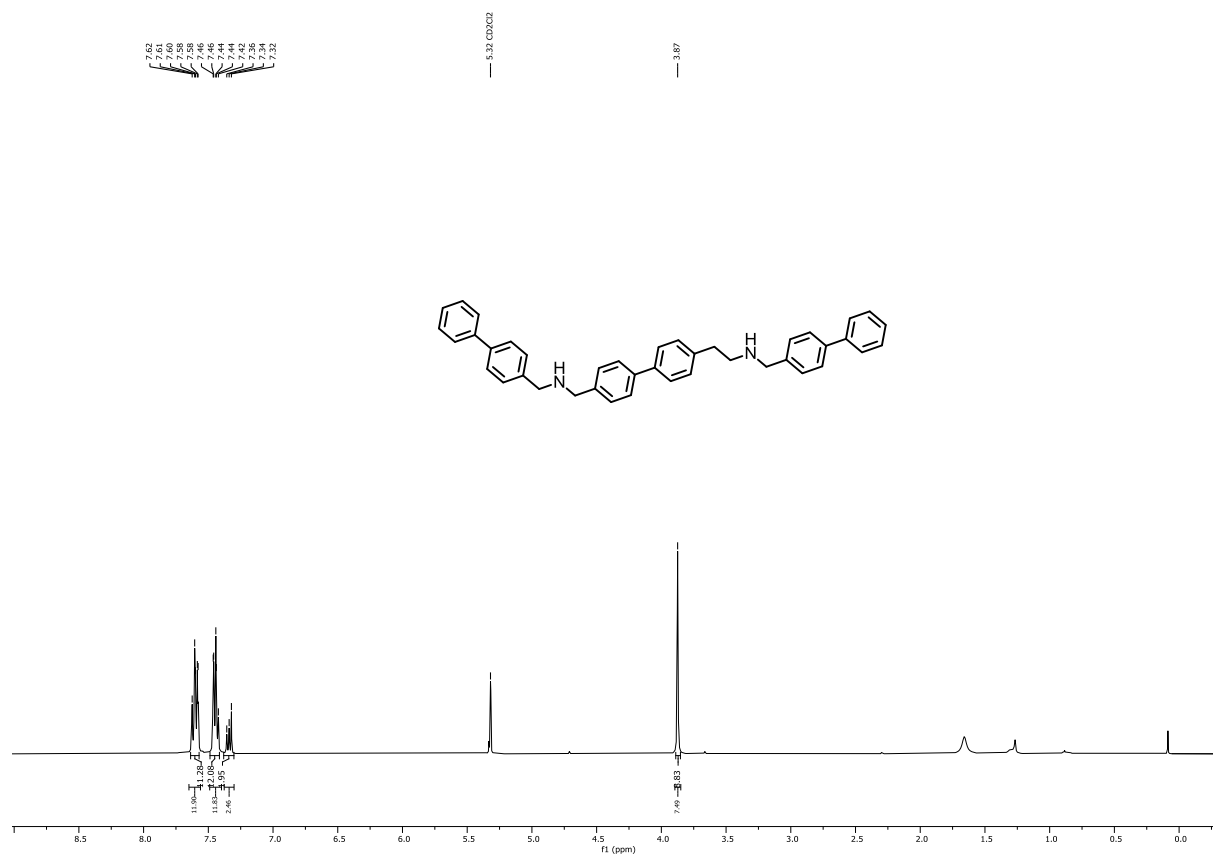

**<sup>13</sup>C-NMR spectra of A in CD<sub>2</sub>Cl<sub>2</sub>**

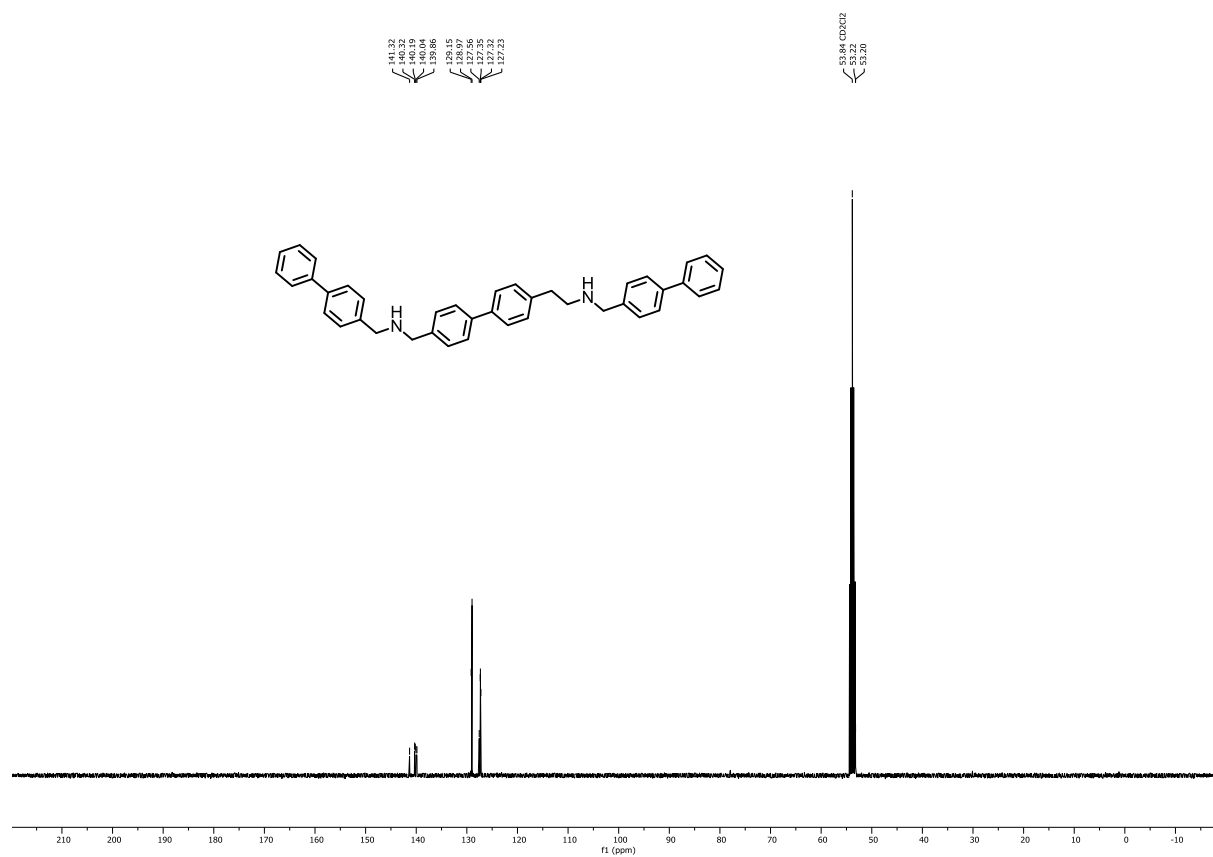

HR-ESI-MS spectra of A

## High Resolution Mass Spectrometry Report

Sample Name **KRO505**  
Comment

Instrument maXis 4G  
Method ms\_nocolumn\_75-1000\_pos.m

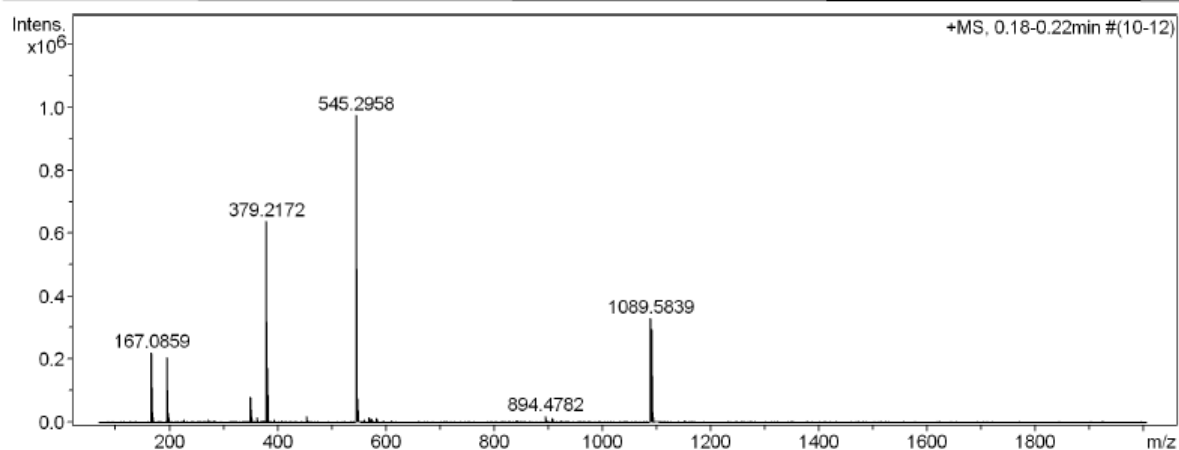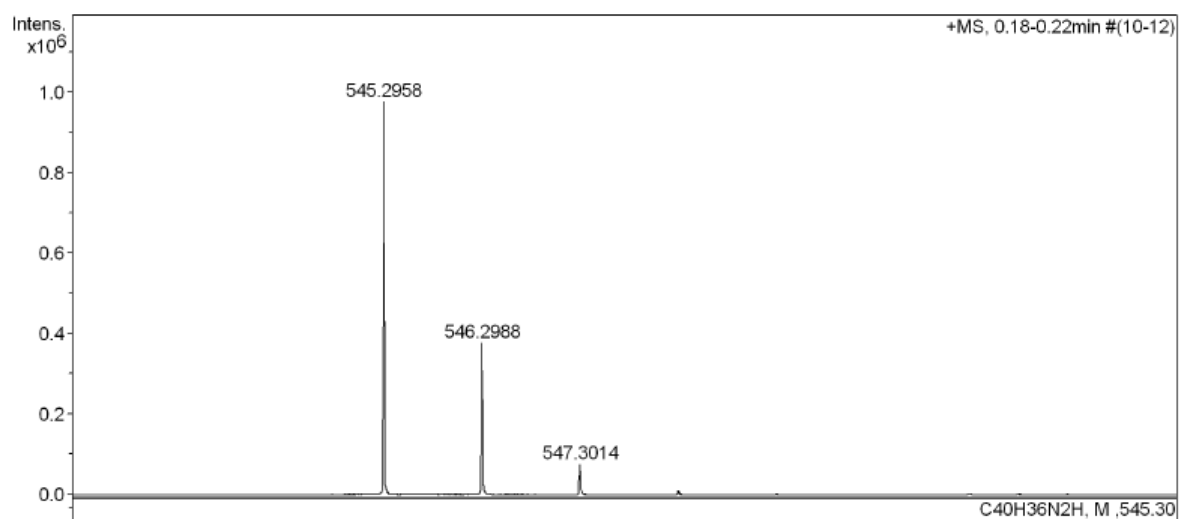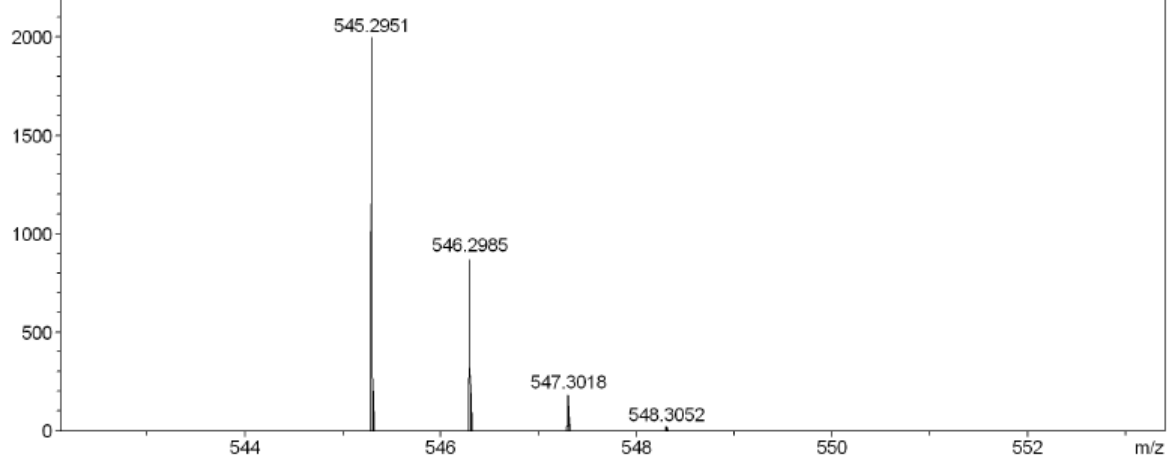

# High Resolution Mass Spectrometry Report

## Measured m/z vs. theoretical m/z

| Meas. m/z | # | Formula          | Score  | m/z       | err [mDa] | err [ppm] | mSigma | rdb  | e <sup>-</sup> Conf | z  |
|-----------|---|------------------|--------|-----------|-----------|-----------|--------|------|---------------------|----|
| 545.2958  | 1 | C 40 H 37 N 2    | 100.00 | 545.2951  | -0.6      | -1.1      | 30.9   | 23.5 | even                | 1+ |
| 567.2764  | 1 | C 40 H 36 N 2 Na | 100.00 | 567.2771  | 0.6       | 1.1       | 27.3   | 23.5 | even                |    |
| 583.2501  | 1 | C 40 H 36 K N 2  | 100.00 | 583.2510  | 0.9       | 1.6       | 22.8   | 23.5 | even                |    |
| 1089.5839 | 1 | C 80 H 73 N 4    | 100.00 | 1089.5830 | -0.9      | -0.8      | 11.3   | 46.5 | even                |    |

## Mass list

| #  | m/z      | I %   | I      |
|----|----------|-------|--------|
| 1  | 167.0859 | 22.6  | 221116 |
| 2  | 168.0890 | 3.4   | 32889  |
| 3  | 169.0928 | 0.3   | 2674   |
| 4  | 196.1123 | 21.0  | 205563 |
| 5  | 197.0963 | 0.3   | 3233   |
| 6  | 197.1154 | 3.2   | 31118  |
| 7  | 198.1184 | 0.3   | 2762   |
| 8  | 226.9513 | 0.9   | 8596   |
| 9  | 273.1512 | 0.9   | 8567   |
| 10 | 273.6530 | 0.5   | 4468   |
| 11 | 280.2633 | 0.2   | 2399   |
| 12 | 282.2790 | 0.7   | 6425   |
| 13 | 296.2578 | 0.3   | 2467   |
| 14 | 304.2610 | 0.2   | 2341   |
| 15 | 333.1637 | 0.3   | 2563   |
| 16 | 350.1902 | 8.3   | 80647  |
| 17 | 351.1931 | 2.1   | 20468  |
| 18 | 352.1965 | 0.3   | 3131   |
| 19 | 362.1901 | 1.7   | 16522  |
| 20 | 362.9261 | 0.3   | 2495   |
| 21 | 363.1929 | 0.5   | 5151   |
| 22 | 370.7035 | 0.4   | 4235   |
| 23 | 371.2046 | 0.3   | 2969   |
| 24 | 375.1850 | 0.6   | 6191   |
| 25 | 378.1848 | 1.9   | 18119  |
| 26 | 379.1886 | 0.7   | 7279   |
| 27 | 379.2172 | 65.5  | 639690 |
| 28 | 380.2013 | 4.1   | 39883  |
| 29 | 380.2199 | 17.7  | 172528 |
| 30 | 381.2047 | 1.3   | 12402  |
| 31 | 381.2226 | 2.4   | 23412  |
| 32 | 382.2259 | 0.3   | 2557   |
| 33 | 393.1955 | 0.8   | 7962   |
| 34 | 393.2320 | 0.4   | 3991   |
| 35 | 394.1797 | 0.7   | 6612   |
| 36 | 395.1827 | 0.3   | 2518   |
| 37 | 395.2097 | 0.2   | 2259   |
| 38 | 407.2475 | 0.5   | 4436   |
| 39 | 430.9130 | 0.3   | 2656   |
| 40 | 453.7426 | 2.1   | 20256  |
| 41 | 454.2441 | 1.7   | 16752  |
| 42 | 454.7457 | 0.6   | 5669   |
| 43 | 536.1649 | 0.3   | 2971   |
| 44 | 545.2958 | 100.0 | 976961 |
| 45 | 546.2988 | 38.6  | 376663 |
| 46 | 547.3014 | 7.7   | 75589  |
| 47 | 548.3046 | 1.1   | 10562  |
| 48 | 559.3103 | 0.9   | 8584   |
| 49 | 560.3139 | 0.3   | 3385   |
| 50 | 561.2894 | 0.3   | 2566   |
| 51 | 567.2764 | 1.5   | 15120  |
| 52 | 568.2798 | 0.6   | 5943   |
| 53 | 573.2531 | 1.1   | 11152  |
| 54 | 573.2876 | 0.3   | 2864   |
| 55 | 573.3258 | 0.7   | 7033   |
| 56 | 574.2562 | 0.5   | 5230   |
| 57 | 574.3230 | 0.9   | 8422   |
| 58 | 575.2659 | 0.3   | 3129   |
| 59 | 575.3245 | 0.4   | 4064   |

## High Resolution Mass Spectrometry Report

| #   | m/z       | I %  | I      |
|-----|-----------|------|--------|
| 60  | 583.2501  | 1.2  | 12030  |
| 61  | 584.2535  | 0.6  | 5405   |
| 62  | 595.2349  | 0.4  | 3679   |
| 63  | 610.1830  | 0.4  | 3789   |
| 64  | 611.1835  | 0.2  | 2416   |
| 65  | 635.2640  | 0.3  | 2906   |
| 66  | 684.2021  | 0.2  | 2312   |
| 67  | 711.3719  | 0.4  | 4038   |
| 68  | 712.3746  | 0.3  | 2567   |
| 69  | 740.3987  | 0.3  | 2484   |
| 70  | 823.3806  | 0.2  | 2132   |
| 71  | 823.4453  | 0.2  | 2096   |
| 72  | 826.5665  | 0.3  | 3259   |
| 73  | 840.5446  | 0.5  | 4403   |
| 74  | 841.5484  | 0.3  | 2883   |
| 75  | 842.5591  | 0.4  | 3868   |
| 76  | 843.5641  | 0.2  | 2393   |
| 77  | 894.4782  | 2.2  | 21249  |
| 78  | 895.4807  | 1.6  | 15603  |
| 79  | 896.4845  | 0.6  | 5984   |
| 80  | 906.4775  | 1.3  | 12859  |
| 81  | 907.4810  | 0.9  | 8811   |
| 82  | 908.4829  | 0.3  | 3344   |
| 83  | 924.4869  | 0.4  | 3788   |
| 84  | 925.4907  | 0.3  | 2661   |
| 85  | 937.4832  | 0.2  | 2315   |
| 86  | 963.6022  | 0.2  | 2249   |
| 87  | 991.6332  | 0.2  | 2191   |
| 88  | 1089.5839 | 34.0 | 331709 |
| 89  | 1090.5872 | 30.1 | 294445 |
| 90  | 1091.5902 | 12.4 | 120801 |
| 91  | 1092.5926 | 3.5  | 33982  |
| 92  | 1093.5956 | 0.8  | 7708   |
| 93  | 1117.5393 | 0.2  | 2286   |
| 94  | 1118.5442 | 0.2  | 2356   |
| 95  | 1139.5229 | 0.2  | 2345   |
| 96  | 1140.5269 | 0.2  | 2146   |
| 97  | 1151.5046 | 0.7  | 6875   |
| 98  | 1152.5073 | 0.6  | 5672   |
| 99  | 1153.5063 | 0.5  | 5231   |
| 100 | 1154.5076 | 0.3  | 3306   |

### Acquisition Parameter

|                   |                              |                |                                       |                |              |           |
|-------------------|------------------------------|----------------|---------------------------------------|----------------|--------------|-----------|
| <b>General</b>    | Fore Vacuum                  | 2.39e+000 mBar | High Vacuum                           | 1.28e-007 mBar | Source Type  | ESI       |
|                   | Scan Begin                   | 75 m/z         | Scan End                              | 2000 m/z       | Ion Polarity | Positive  |
| <b>Source</b>     | Set Nebulizer                | 2.0 Bar        | Set Capillary                         | 4500 V         | Set Dry Gas  | 8.0 l/min |
|                   | Set Dry Heater               | 200 °C         | Set End Plate Offset                  | -500 V         |              |           |
| <b>Quadrupole</b> | Set Ion Energy ( MS only )   | 4.0 eV         |                                       |                | 100.0 Vpp    |           |
| <b>Coll. Cell</b> | Collision Energy             | 8.0 eV         | Set Collision Cell RF                 | 500.0 Vpp      |              |           |
| <b>Ion Cooler</b> | Set Ion Cooler Transfer Time | 75.0 µs        | Set Ion Cooler Pre Pulse Storage Time | 10.0 µs        |              |           |

HR-ESI-MS spectra of O<sub>M</sub>-I-dimer

### High Resolution Mass Spectrometry Report

Sample Name **KRO380**  
Comment

Instrument **maXis 4G**  
Method **ms\_nocolumn\_high\_pos\_use\_acn.m**

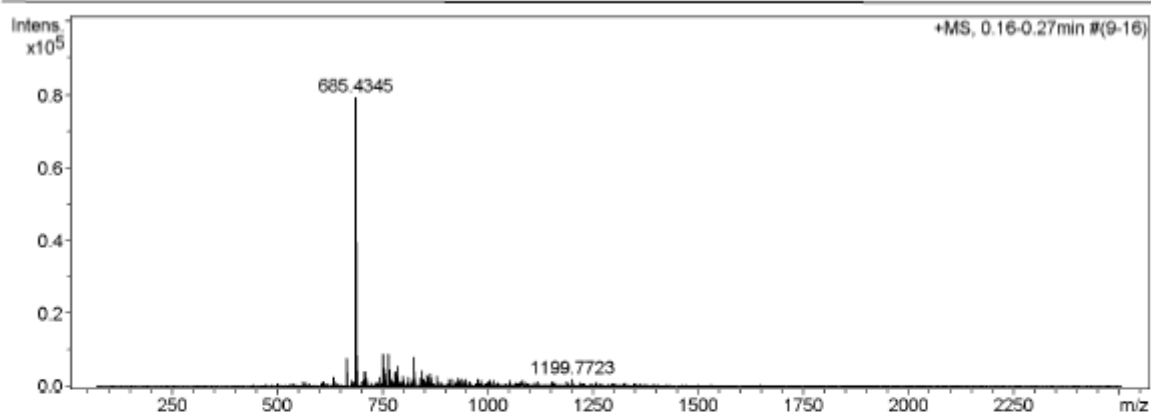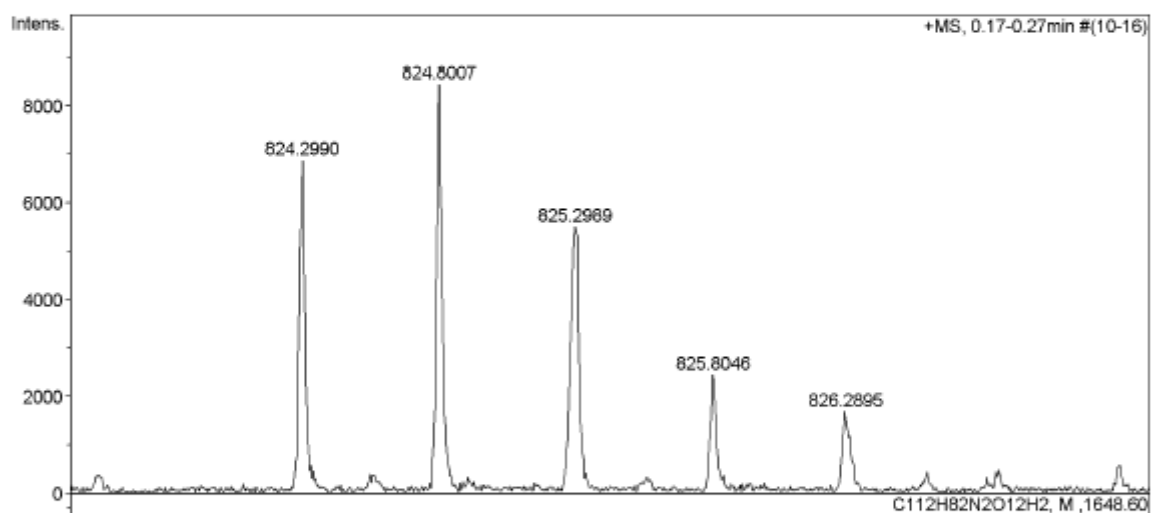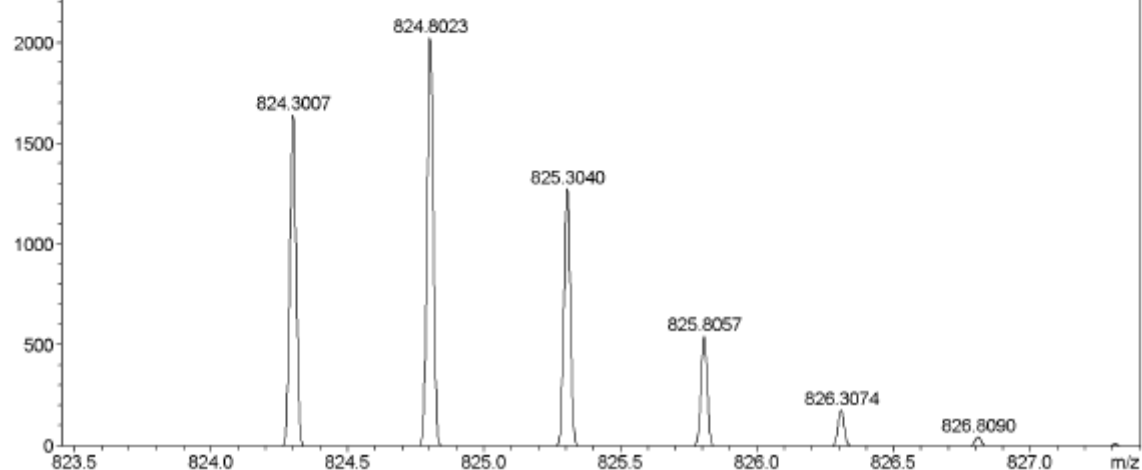



# High Resolution Mass Spectrometry Report

## Measured m/z vs. theoretical m/z

| Meas. m/z | # | Formula             | Score  | m/z      | err [mDa] | err [ppm] | mSigma | rdB  | e <sup>-</sup> Conf | z  |
|-----------|---|---------------------|--------|----------|-----------|-----------|--------|------|---------------------|----|
| 824.2990  | 1 | C 112 H 84 N 2 O 12 | 100.00 | 824.3007 | 1.7       | 2.0       | 39.4   | 72.0 | even                | 2+ |

## Mass list

| #  | m/z      | I %   | I     |
|----|----------|-------|-------|
| 1  | 559.1310 | 1.9   | 1551  |
| 2  | 610.1839 | 1.6   | 1300  |
| 3  | 633.1490 | 3.1   | 2516  |
| 4  | 634.1500 | 2.1   | 1661  |
| 5  | 635.1478 | 1.6   | 1289  |
| 6  | 663.4525 | 9.9   | 8006  |
| 7  | 664.4555 | 5.2   | 4218  |
| 8  | 665.4576 | 1.7   | 1332  |
| 9  | 673.8863 | 1.9   | 1560  |
| 10 | 680.4781 | 1.7   | 1402  |
| 11 | 685.4345 | 100.0 | 80641 |
| 12 | 686.4377 | 47.5  | 38318 |
| 13 | 687.4407 | 11.0  | 8859  |
| 14 | 688.4429 | 2.0   | 1587  |
| 15 | 701.4085 | 1.8   | 1435  |
| 16 | 702.8631 | 1.9   | 1546  |
| 17 | 707.1672 | 5.5   | 4470  |
| 18 | 708.1681 | 3.5   | 2842  |
| 19 | 708.5102 | 2.2   | 1736  |
| 20 | 709.1657 | 3.2   | 2603  |
| 21 | 709.3798 | 5.3   | 4266  |
| 22 | 710.1656 | 1.6   | 1310  |
| 23 | 710.3817 | 2.6   | 2077  |
| 24 | 711.3787 | 2.8   | 2246  |
| 25 | 712.8967 | 1.9   | 1494  |
| 26 | 741.8743 | 3.1   | 2487  |
| 27 | 750.4052 | 11.4  | 9178  |
| 28 | 751.4089 | 6.0   | 4821  |
| 29 | 752.4051 | 6.2   | 4982  |
| 30 | 753.3546 | 4.3   | 3431  |
| 31 | 753.4117 | 3.5   | 2839  |
| 32 | 754.3582 | 2.1   | 1716  |
| 33 | 755.3546 | 4.4   | 3563  |
| 34 | 756.3580 | 1.9   | 1544  |
| 35 | 764.5723 | 12.0  | 9655  |
| 36 | 765.5757 | 6.2   | 4967  |
| 37 | 766.5800 | 1.7   | 1407  |
| 38 | 770.8509 | 1.9   | 1533  |
| 39 | 776.2304 | 1.7   | 1386  |
| 40 | 778.5520 | 5.0   | 3993  |
| 41 | 779.5545 | 2.6   | 2120  |
| 42 | 780.8849 | 2.0   | 1598  |
| 43 | 781.1864 | 5.1   | 4138  |
| 44 | 782.1874 | 3.5   | 2810  |
| 45 | 783.1861 | 3.2   | 2559  |
| 46 | 784.1848 | 2.0   | 1576  |
| 47 | 784.5406 | 6.7   | 5383  |
| 48 | 785.5430 | 4.7   | 3763  |
| 49 | 786.5392 | 2.0   | 1626  |
| 50 | 792.6039 | 2.0   | 1591  |
| 51 | 798.5569 | 3.5   | 2799  |
| 52 | 799.5597 | 2.1   | 1677  |
| 53 | 809.8612 | 3.0   | 2457  |
| 54 | 821.4082 | 2.7   | 2187  |
| 55 | 824.2990 | 8.5   | 6884  |
| 56 | 824.8007 | 10.5  | 8457  |
| 57 | 825.2989 | 6.8   | 5520  |
| 58 | 825.8046 | 3.0   | 2457  |
| 59 | 826.2895 | 2.1   | 1700  |
| 60 | 838.8373 | 2.9   | 2338  |
| 61 | 842.3096 | 6.0   | 4858  |
| 62 | 843.3139 | 4.2   | 3360  |

## High Resolution Mass Spectrometry Report

| #   | m/z       | I%  | I    |
|-----|-----------|-----|------|
| 63  | 848.8722  | 2.2 | 1814 |
| 64  | 850.2495  | 1.6 | 1294 |
| 65  | 855.2059  | 4.0 | 3237 |
| 66  | 856.2087  | 3.1 | 2525 |
| 67  | 857.2053  | 3.1 | 2532 |
| 68  | 858.2026  | 1.6 | 1305 |
| 69  | 864.2919  | 4.8 | 3860 |
| 70  | 865.2963  | 3.2 | 2584 |
| 71  | 877.8488  | 3.6 | 2935 |
| 72  | 906.8249  | 1.8 | 1464 |
| 73  | 907.7711  | 2.7 | 2153 |
| 74  | 908.7745  | 1.7 | 1337 |
| 75  | 916.8610  | 2.3 | 1849 |
| 76  | 929.2239  | 2.7 | 2205 |
| 77  | 930.2252  | 2.6 | 2079 |
| 78  | 931.2244  | 2.6 | 2130 |
| 79  | 932.2234  | 1.6 | 1319 |
| 80  | 932.2779  | 2.9 | 2374 |
| 81  | 933.2823  | 1.7 | 1399 |
| 82  | 939.5949  | 2.3 | 1858 |
| 83  | 940.5986  | 1.8 | 1440 |
| 84  | 945.8362  | 2.4 | 1920 |
| 85  | 957.3831  | 1.8 | 1429 |
| 86  | 974.8134  | 1.6 | 1293 |
| 87  | 975.7587  | 2.4 | 1963 |
| 88  | 976.7620  | 1.6 | 1260 |
| 89  | 984.8466  | 2.0 | 1593 |
| 90  | 1000.2700 | 1.7 | 1408 |
| 91  | 1003.2440 | 2.0 | 1633 |
| 92  | 1004.2454 | 2.3 | 1831 |
| 93  | 1005.2417 | 2.0 | 1632 |
| 94  | 1013.8228 | 1.9 | 1522 |
| 95  | 1052.8351 | 1.8 | 1484 |
| 96  | 1077.2612 | 1.6 | 1252 |
| 97  | 1078.2648 | 1.6 | 1253 |
| 98  | 1081.8121 | 1.9 | 1493 |
| 99  | 1199.7723 | 2.7 | 2155 |
| 100 | 1200.7780 | 2.0 | 1620 |

### Acquisition Parameter

|                   |                              |                |                                       |                |              |           |
|-------------------|------------------------------|----------------|---------------------------------------|----------------|--------------|-----------|
| <b>General</b>    | Fore Vacuum                  | 3.07e+000 mBar | High Vacuum                           | 9.18e-008 mBar | Source Type  | ESI       |
|                   | Scan Begin                   | 75 m/z         | Scan End                              | 2500 m/z       | Ion Polarity | Positive  |
| <b>Source</b>     | Set Nebulizer                | 2.0 Bar        | Set Capillary                         | 4500 V         | Set Dry Gas  | 8.0 l/min |
|                   | Set Dry Heater               | 200 °C         | Set End Plate Offset                  | -500 V         |              |           |
| <b>Quadrupole</b> | Set Ion Energy ( MS only )   | 4.0 eV         |                                       |                |              |           |
| <b>Coll. Cell</b> | Collision Energy             | 12.0 eV        | Set Collision Cell RF                 | 2000.0 Vpp     | 800.0 Vpp    |           |
| <b>Ion Cooler</b> | Set Ion Cooler Transfer Time | 120.0 µs       | Set Ion Cooler Pre Pulse Storage Time | 18.0 µs        |              |           |

## High Resolution Mass Spectrometry Report

|             |                                                         |            |                      |
|-------------|---------------------------------------------------------|------------|----------------------|
| Sample Name | KRO489                                                  | Instrument | maXis 4G             |
| Comment     | dissolved THF+CHCl <sub>3</sub> (nothing further added) | Method     | 24 Direct_pos_high.m |

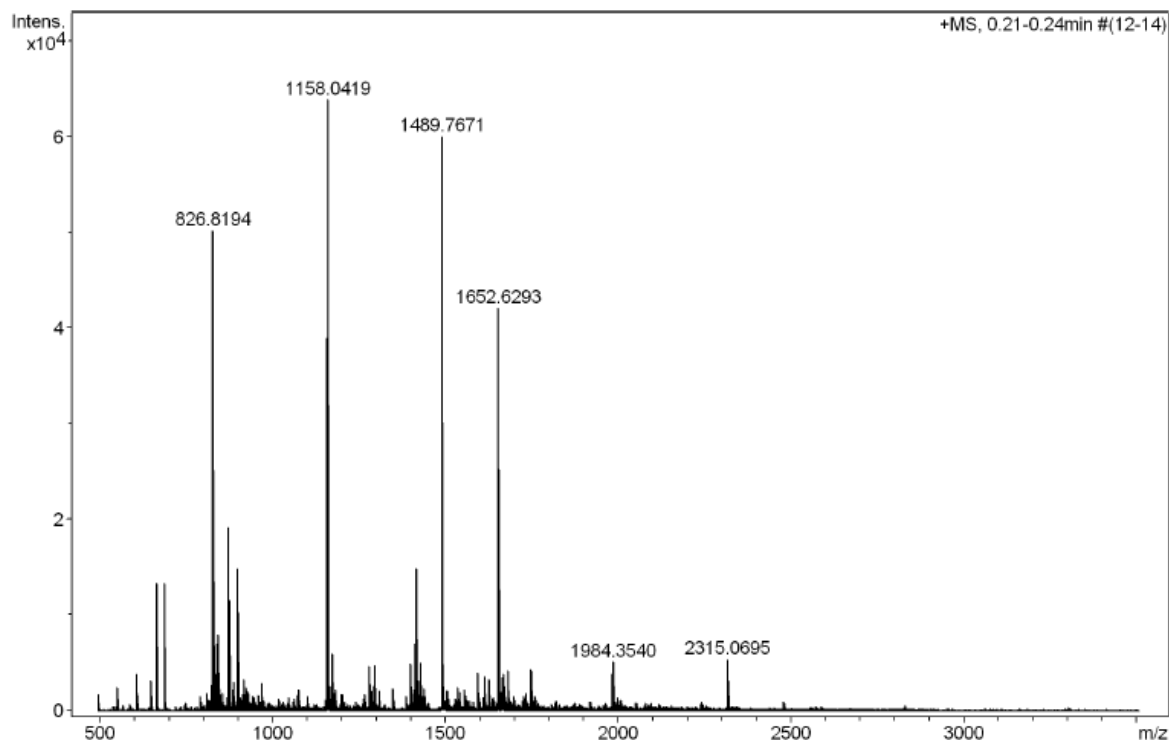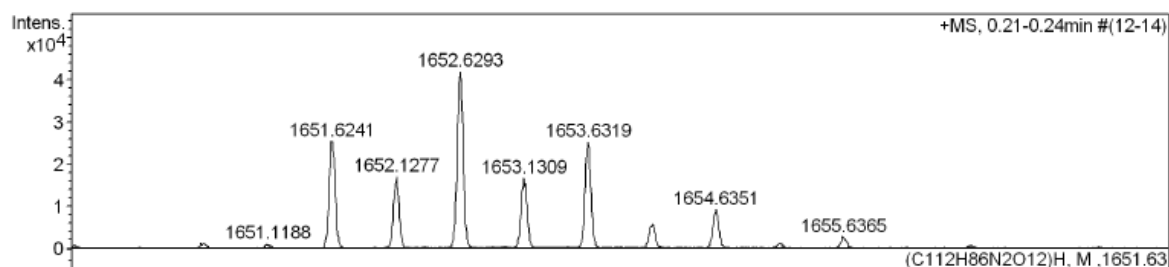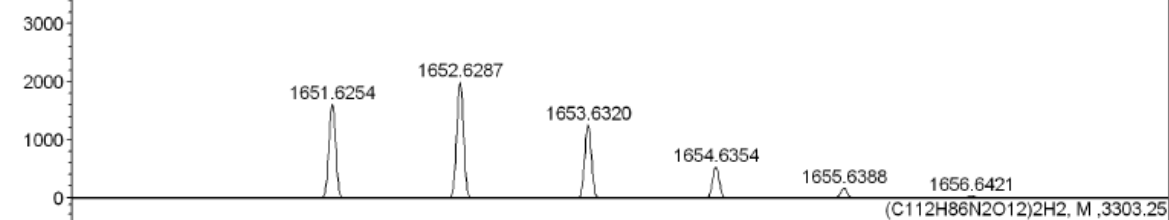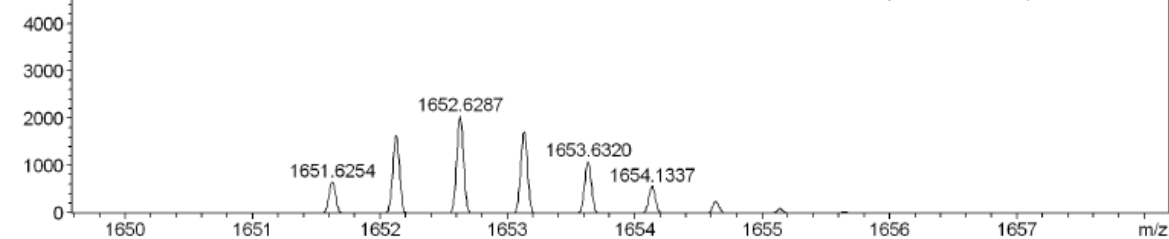

---

# High Resolution Mass Spectrometry Report

---

## Measured m/z vs. theoretical m/z

| Meas. m/z | # | Formula             | Score  | m/z       | err [mDa] | err [ppm] | mSigma | rdb  | e <sup>-</sup> Conf | z  |
|-----------|---|---------------------|--------|-----------|-----------|-----------|--------|------|---------------------|----|
| 1651.6241 | 1 | C 112 H 87 N 2 O 12 | 100.00 | 1651.6254 | 1.3       | 0.8       | 88.2   | 70.5 | even                | 1+ |

## Mass list

| #  | m/z       | I %   | I     |
|----|-----------|-------|-------|
| 1  | 607.3971  | 6.0   | 3814  |
| 2  | 647.4630  | 4.9   | 3098  |
| 3  | 663.4573  | 20.9  | 13369 |
| 4  | 664.4605  | 9.4   | 6017  |
| 5  | 685.4387  | 20.9  | 13328 |
| 6  | 686.4417  | 9.3   | 5963  |
| 7  | 825.2862  | 28.8  | 18419 |
| 8  | 826.3160  | 67.7  | 43242 |
| 9  | 826.8194  | 78.7  | 50229 |
| 10 | 827.3185  | 57.9  | 36976 |
| 11 | 827.8223  | 21.3  | 13606 |
| 12 | 828.3156  | 10.3  | 6586  |
| 13 | 835.3230  | 5.2   | 3350  |
| 14 | 835.8253  | 5.9   | 3797  |
| 15 | 840.3322  | 11.0  | 7056  |
| 16 | 840.8348  | 12.5  | 7960  |
| 17 | 841.3356  | 8.4   | 5333  |
| 18 | 842.3111  | 4.6   | 2933  |
| 19 | 870.3425  | 20.6  | 13176 |
| 20 | 871.3462  | 12.6  | 8019  |
| 21 | 872.3572  | 30.0  | 19159 |
| 22 | 873.3606  | 18.1  | 11555 |
| 23 | 874.3633  | 5.7   | 3661  |
| 24 | 896.3579  | 6.0   | 3806  |
| 25 | 898.3727  | 23.2  | 14811 |
| 26 | 899.3757  | 16.1  | 10281 |
| 27 | 900.3836  | 12.6  | 8035  |
| 28 | 901.3898  | 5.8   | 3700  |
| 29 | 916.3809  | 5.1   | 3274  |
| 30 | 967.3555  | 4.5   | 2878  |
| 31 | 1157.5397 | 61.1  | 39000 |
| 32 | 1158.0419 | 100.0 | 63862 |
| 33 | 1158.5437 | 89.6  | 57217 |
| 34 | 1159.0451 | 51.4  | 32843 |
| 35 | 1159.5456 | 22.5  | 14400 |
| 36 | 1160.0467 | 9.8   | 6243  |
| 37 | 1171.5535 | 7.0   | 4465  |
| 38 | 1172.0563 | 9.4   | 6000  |
| 39 | 1172.5586 | 7.9   | 5033  |
| 40 | 1173.0597 | 4.6   | 2944  |
| 41 | 1280.2116 | 6.5   | 4169  |
| 42 | 1280.7137 | 7.3   | 4645  |
| 43 | 1281.2143 | 4.4   | 2830  |
| 44 | 1294.2270 | 7.1   | 4518  |
| 45 | 1294.7285 | 7.4   | 4720  |
| 46 | 1295.2299 | 4.5   | 2850  |
| 47 | 1399.3271 | 7.5   | 4804  |
| 48 | 1399.8298 | 7.5   | 4760  |
| 49 | 1400.3307 | 5.4   | 3424  |
| 50 | 1412.8400 | 5.2   | 3305  |
| 51 | 1413.3432 | 10.9  | 6975  |
| 52 | 1413.8452 | 10.2  | 6521  |
| 53 | 1414.3456 | 8.6   | 5498  |
| 54 | 1414.7079 | 13.0  | 8318  |
| 55 | 1415.2095 | 22.7  | 14480 |
| 56 | 1415.7114 | 23.2  | 14819 |
| 57 | 1416.2129 | 16.6  | 10574 |
| 58 | 1416.7157 | 9.0   | 5777  |
| 59 | 1422.3484 | 4.9   | 3146  |
| 60 | 1427.3584 | 7.5   | 4781  |
| 61 | 1427.8596 | 7.8   | 4955  |
| 62 | 1428.3635 | 5.0   | 3223  |

## High Resolution Mass Spectrometry Report

| #   | m/z       | I%   | I     |
|-----|-----------|------|-------|
| 63  | 1488.7635 | 40.9 | 26126 |
| 64  | 1489.2652 | 86.5 | 55251 |
| 65  | 1489.7671 | 94.0 | 60049 |
| 66  | 1490.2684 | 72.5 | 46277 |
| 67  | 1490.7696 | 39.7 | 25380 |
| 68  | 1491.2715 | 18.6 | 11905 |
| 69  | 1491.7731 | 6.8  | 4319  |
| 70  | 1592.7523 | 5.2  | 3300  |
| 71  | 1593.2536 | 6.2  | 3991  |
| 72  | 1611.9358 | 5.6  | 3585  |
| 73  | 1612.4393 | 4.4  | 2832  |
| 74  | 1625.9515 | 5.1  | 3265  |
| 75  | 1651.6241 | 39.9 | 25502 |
| 76  | 1652.1277 | 26.9 | 17173 |
| 77  | 1652.6293 | 66.0 | 42118 |
| 78  | 1653.1309 | 26.1 | 16683 |
| 79  | 1653.6319 | 39.6 | 25299 |
| 80  | 1654.1344 | 9.1  | 5832  |
| 81  | 1654.6351 | 14.6 | 9355  |
| 82  | 1666.1408 | 4.9  | 3155  |
| 83  | 1666.6407 | 6.0  | 3823  |
| 84  | 1667.1436 | 5.5  | 3505  |
| 85  | 1679.6540 | 5.3  | 3409  |
| 86  | 1680.6565 | 6.5  | 4120  |
| 87  | 1681.6598 | 4.5  | 2848  |
| 88  | 1746.4335 | 5.7  | 3614  |
| 89  | 1746.9362 | 6.8  | 4352  |
| 90  | 1747.4355 | 6.6  | 4216  |
| 91  | 1747.9371 | 4.7  | 2993  |
| 92  | 1983.3501 | 6.0  | 3861  |
| 93  | 1983.8516 | 7.3  | 4663  |
| 94  | 1984.3540 | 8.0  | 5119  |
| 95  | 1984.8558 | 5.9  | 3783  |
| 96  | 1985.3557 | 4.4  | 2825  |
| 97  | 2314.0632 | 4.8  | 3080  |
| 98  | 2315.0695 | 8.4  | 5382  |
| 99  | 2316.0720 | 7.4  | 4714  |
| 100 | 2317.0783 | 4.4  | 2798  |

### Acquisition Parameter

|                   |                              |                |                                       |                |              |           |
|-------------------|------------------------------|----------------|---------------------------------------|----------------|--------------|-----------|
| <b>General</b>    | Fore Vacuum                  | 2.61e+000 mBar | High Vacuum                           | 9.50e-008 mBar | Source Type  | ESI       |
|                   | Scan Begin                   | 500 m/z        | Scan End                              | 3500 m/z       | Ion Polarity | Positive  |
| <b>Source</b>     | Set Nebulizer                | 0.4 Bar        | Set Capillary                         | 3600 V         | Set Dry Gas  | 4.0 l/min |
|                   | Set Dry Heater               | 180 °C         | Set End Plate Offset                  | -500 V         |              |           |
| <b>Quadrupole</b> | Set Ion Energy ( MS only )   | 4.0 eV         |                                       |                |              |           |
| <b>Coll. Cell</b> | Collision Energy             | 70.0 eV        | Set Collision Cell RF                 | 2000.0 Vpp     |              | 300.0 Vpp |
| <b>Ion Cooler</b> | Set Ion Cooler Transfer Time | 142.0 µs       | Set Ion Cooler Pre Pulse Storage Time |                |              | 22.0 µs   |

## High Resolution Mass Spectrometry Report

|             |                                                         |            |                      |
|-------------|---------------------------------------------------------|------------|----------------------|
| Sample Name | KRO489                                                  | Instrument | maXis 4G             |
| Comment     | dissolved THF+CHCl <sub>3</sub> (nothing further added) | Method     | 24 Direct_pos_high.m |

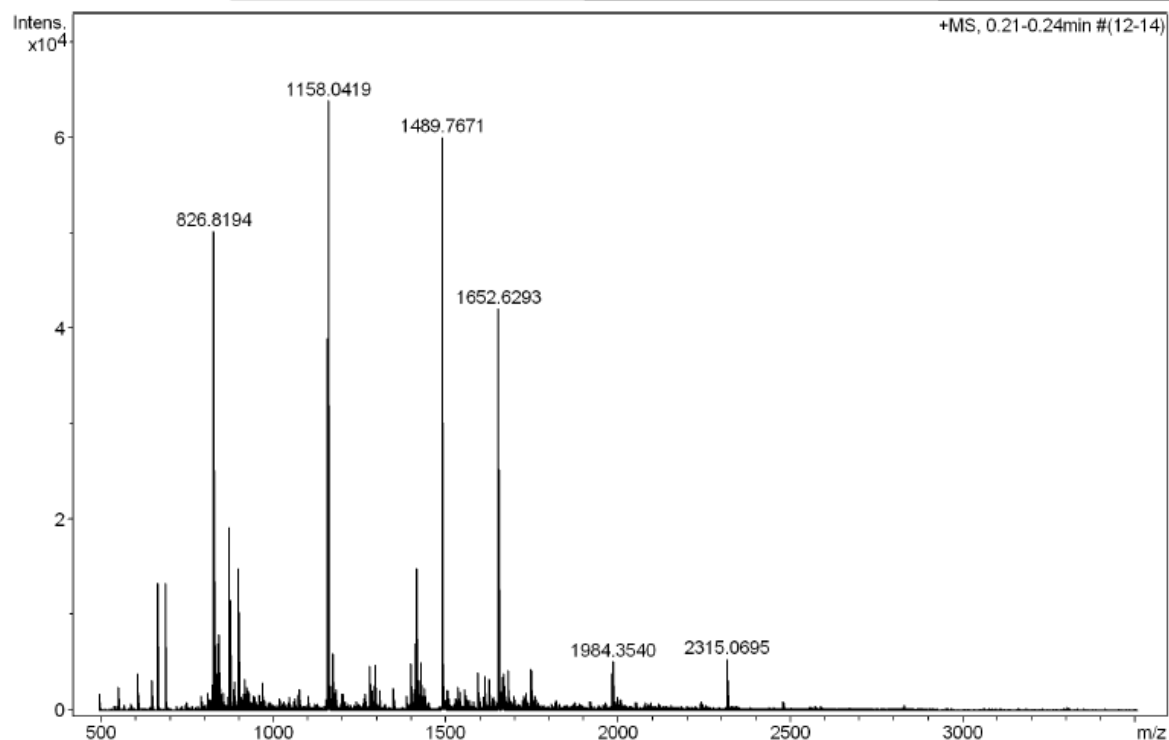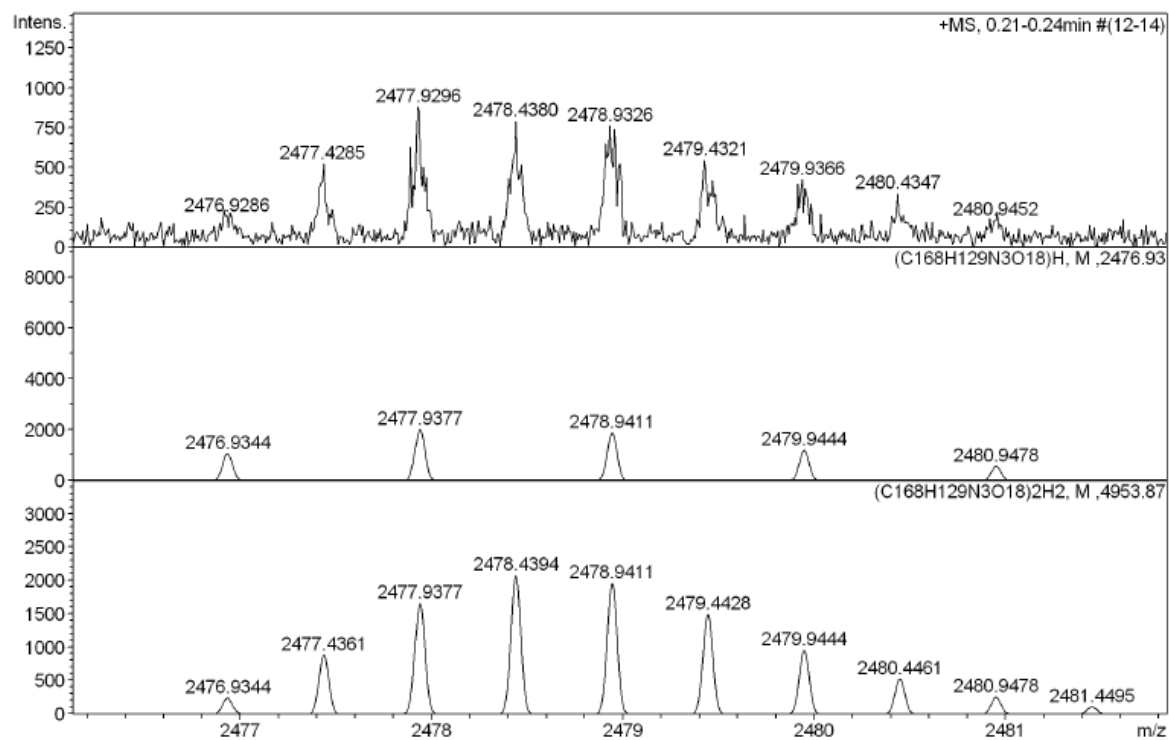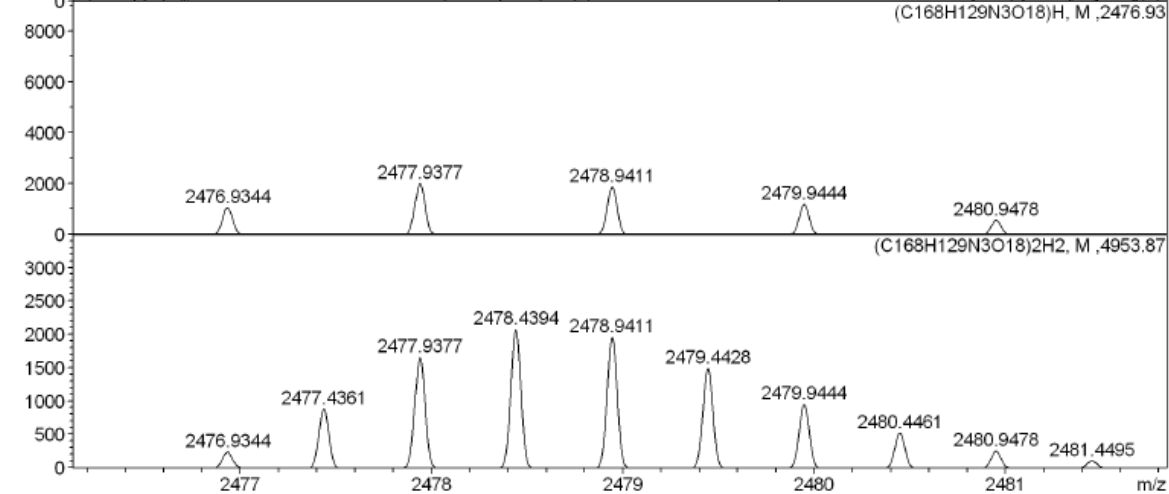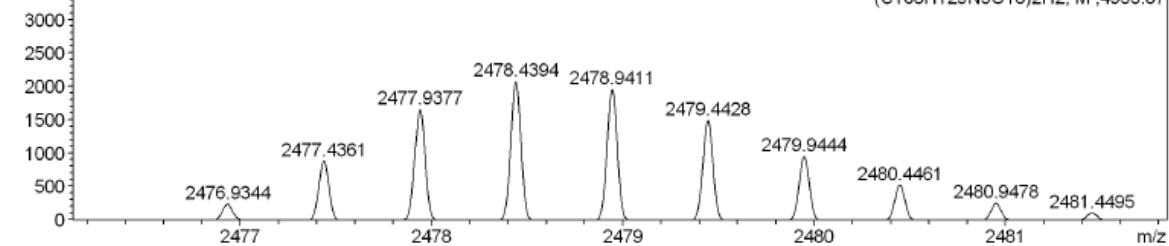

# High Resolution Mass Spectrometry Report

## Measured m/z vs. theoretical m/z

| Meas. m/z | # | Formula             | Score  | m/z       | err [mDa] | err [ppm] | mSigma | rdb  | e <sup>-</sup> Conf | z  |
|-----------|---|---------------------|--------|-----------|-----------|-----------|--------|------|---------------------|----|
| 1651.6241 | 1 | C 112 H 87 N 2 O 12 | 100.00 | 1651.6254 | 1.3       | 0.8       | 88.2   | 70.5 | even                | 1+ |

## Mass list

| #  | m/z       | I %   | I     |
|----|-----------|-------|-------|
| 1  | 607.3971  | 6.0   | 3814  |
| 2  | 647.4630  | 4.9   | 3098  |
| 3  | 663.4573  | 20.9  | 13369 |
| 4  | 664.4605  | 9.4   | 6017  |
| 5  | 685.4387  | 20.9  | 13328 |
| 6  | 686.4417  | 9.3   | 5963  |
| 7  | 825.2862  | 28.8  | 18419 |
| 8  | 826.3160  | 67.7  | 43242 |
| 9  | 826.8194  | 78.7  | 50229 |
| 10 | 827.3185  | 57.9  | 36976 |
| 11 | 827.8223  | 21.3  | 13606 |
| 12 | 828.3156  | 10.3  | 6586  |
| 13 | 835.3230  | 5.2   | 3350  |
| 14 | 835.8253  | 5.9   | 3797  |
| 15 | 840.3322  | 11.0  | 7056  |
| 16 | 840.8348  | 12.5  | 7960  |
| 17 | 841.3356  | 8.4   | 5333  |
| 18 | 842.3111  | 4.6   | 2933  |
| 19 | 870.3425  | 20.6  | 13176 |
| 20 | 871.3462  | 12.6  | 8019  |
| 21 | 872.3572  | 30.0  | 19159 |
| 22 | 873.3606  | 18.1  | 11555 |
| 23 | 874.3633  | 5.7   | 3661  |
| 24 | 896.3579  | 6.0   | 3806  |
| 25 | 898.3727  | 23.2  | 14811 |
| 26 | 899.3757  | 16.1  | 10281 |
| 27 | 900.3836  | 12.6  | 8035  |
| 28 | 901.3898  | 5.8   | 3700  |
| 29 | 916.3809  | 5.1   | 3274  |
| 30 | 967.3555  | 4.5   | 2878  |
| 31 | 1157.5397 | 61.1  | 39000 |
| 32 | 1158.0419 | 100.0 | 63862 |
| 33 | 1158.5437 | 89.6  | 57217 |
| 34 | 1159.0451 | 51.4  | 32843 |
| 35 | 1159.5456 | 22.5  | 14400 |
| 36 | 1160.0467 | 9.8   | 6243  |
| 37 | 1171.5535 | 7.0   | 4465  |
| 38 | 1172.0563 | 9.4   | 6000  |
| 39 | 1172.5586 | 7.9   | 5033  |
| 40 | 1173.0597 | 4.6   | 2944  |
| 41 | 1280.2116 | 6.5   | 4169  |
| 42 | 1280.7137 | 7.3   | 4645  |
| 43 | 1281.2143 | 4.4   | 2830  |
| 44 | 1294.2270 | 7.1   | 4518  |
| 45 | 1294.7285 | 7.4   | 4720  |
| 46 | 1295.2299 | 4.5   | 2850  |
| 47 | 1399.3271 | 7.5   | 4804  |
| 48 | 1399.8298 | 7.5   | 4760  |
| 49 | 1400.3307 | 5.4   | 3424  |
| 50 | 1412.8400 | 5.2   | 3305  |
| 51 | 1413.3432 | 10.9  | 6975  |
| 52 | 1413.8452 | 10.2  | 6521  |
| 53 | 1414.3456 | 8.6   | 5498  |
| 54 | 1414.7079 | 13.0  | 8318  |
| 55 | 1415.2095 | 22.7  | 14480 |
| 56 | 1415.7114 | 23.2  | 14819 |
| 57 | 1416.2129 | 16.6  | 10574 |
| 58 | 1416.7157 | 9.0   | 5777  |
| 59 | 1422.3484 | 4.9   | 3146  |
| 60 | 1427.3584 | 7.5   | 4781  |
| 61 | 1427.8596 | 7.8   | 4955  |
| 62 | 1428.3635 | 5.0   | 3223  |

## High Resolution Mass Spectrometry Report

| #   | m/z       | I %  | I     |
|-----|-----------|------|-------|
| 63  | 1488.7635 | 40.9 | 26126 |
| 64  | 1489.2652 | 86.5 | 55251 |
| 65  | 1489.7671 | 94.0 | 60049 |
| 66  | 1490.2684 | 72.5 | 46277 |
| 67  | 1490.7696 | 39.7 | 25380 |
| 68  | 1491.2715 | 18.6 | 11905 |
| 69  | 1491.7731 | 6.8  | 4319  |
| 70  | 1592.7523 | 5.2  | 3300  |
| 71  | 1593.2536 | 6.2  | 3991  |
| 72  | 1611.9358 | 5.6  | 3585  |
| 73  | 1612.4393 | 4.4  | 2832  |
| 74  | 1625.9515 | 5.1  | 3265  |
| 75  | 1651.6241 | 39.9 | 25502 |
| 76  | 1652.1277 | 26.9 | 17173 |
| 77  | 1652.6293 | 66.0 | 42118 |
| 78  | 1653.1309 | 26.1 | 16683 |
| 79  | 1653.6319 | 39.6 | 25299 |
| 80  | 1654.1344 | 9.1  | 5832  |
| 81  | 1654.6351 | 14.6 | 9355  |
| 82  | 1666.1408 | 4.9  | 3155  |
| 83  | 1666.6407 | 6.0  | 3823  |
| 84  | 1667.1436 | 5.5  | 3505  |
| 85  | 1679.6540 | 5.3  | 3409  |
| 86  | 1680.6565 | 6.5  | 4120  |
| 87  | 1681.6598 | 4.5  | 2848  |
| 88  | 1746.4335 | 5.7  | 3614  |
| 89  | 1746.9362 | 6.8  | 4352  |
| 90  | 1747.4355 | 6.6  | 4216  |
| 91  | 1747.9371 | 4.7  | 2993  |
| 92  | 1983.3501 | 6.0  | 3861  |
| 93  | 1983.8516 | 7.3  | 4663  |
| 94  | 1984.3540 | 8.0  | 5119  |
| 95  | 1984.8558 | 5.9  | 3783  |
| 96  | 1985.3557 | 4.4  | 2825  |
| 97  | 2314.0632 | 4.8  | 3080  |
| 98  | 2315.0695 | 8.4  | 5382  |
| 99  | 2316.0720 | 7.4  | 4714  |
| 100 | 2317.0783 | 4.4  | 2798  |

### Acquisition Parameter

|                   |                              |                |                                       |                |              |           |
|-------------------|------------------------------|----------------|---------------------------------------|----------------|--------------|-----------|
| <b>General</b>    | Fore Vacuum                  | 2.61e+000 mBar | High Vacuum                           | 9.50e-008 mBar | Source Type  | ESI       |
|                   | Scan Begin                   | 500 m/z        | Scan End                              | 3500 m/z       | Ion Polarity | Positive  |
| <b>Source</b>     | Set Nebulizer                | 0.4 Bar        | Set Capillary                         | 3600 V         | Set Dry Gas  | 4.0 l/min |
|                   | Set Dry Heater               | 180 °C         | Set End Plate Offset                  | -500 V         |              |           |
| <b>Quadrupole</b> | Set Ion Energy ( MS only )   | 4.0 eV         |                                       |                |              |           |
| <b>Coll. Cell</b> | Collision Energy             | 70.0 eV        | Set Collision Cell RF                 | 2000.0 Vpp     | 300.0 Vpp    |           |
| <b>Ion Cooler</b> | Set Ion Cooler Transfer Time | 142.0 µs       | Set Ion Cooler Pre Pulse Storage Time | 22.0 µs        |              |           |



## High Resolution Mass Spectrometry Report

|             |                                                         |            |                      |
|-------------|---------------------------------------------------------|------------|----------------------|
| Sample Name | KRO489                                                  | Instrument | maXis 4G             |
| Comment     | dissolved THF+CHCl <sub>3</sub> (nothing further added) | Method     | 24 Direct_pos_high.m |

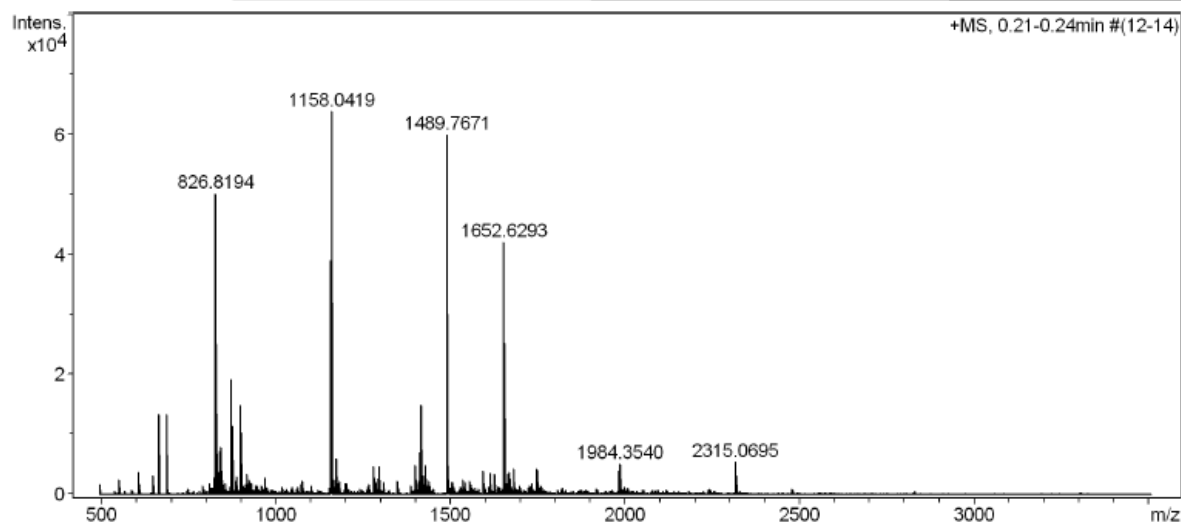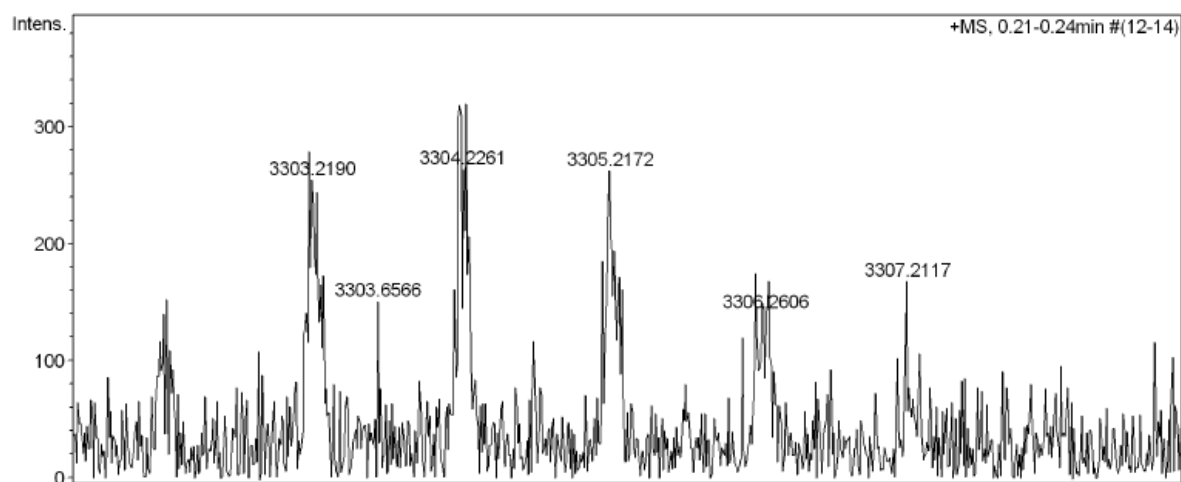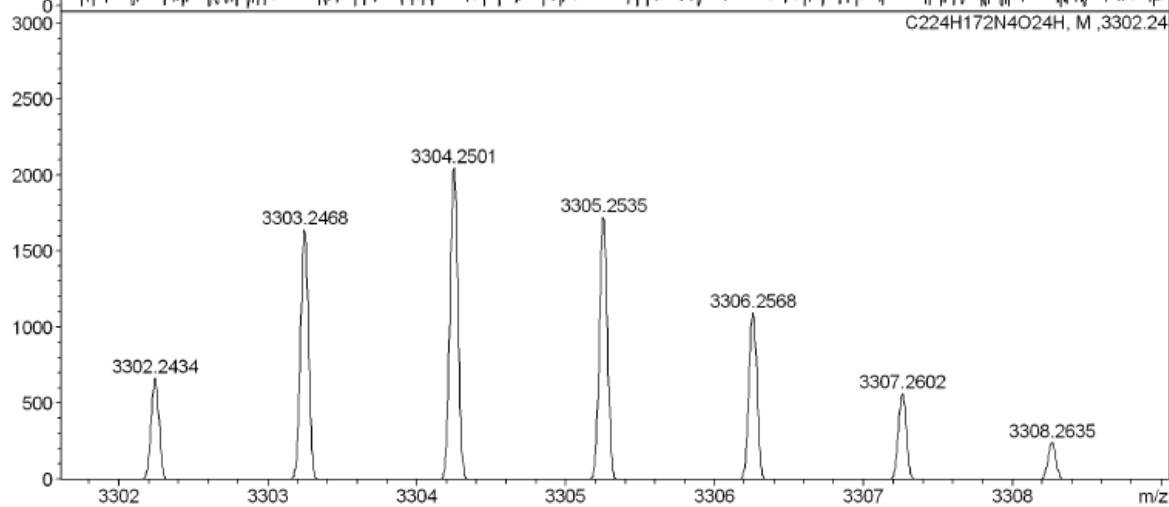

---

## High Resolution Mass Spectrometry Report

---

### Measured m/z vs. theoretical m/z

| Meas. m/z | # | Formula             | Score  | m/z       | err [mDa] | err [ppm] | mSigma | rdb  | e <sup>-</sup> Conf | z  |
|-----------|---|---------------------|--------|-----------|-----------|-----------|--------|------|---------------------|----|
| 1651.6241 | 1 | C 112 H 87 N 2 O 12 | 100.00 | 1651.6254 | 1.3       | 0.8       | 88.2   | 70.5 | even                | 1+ |

### Mass list

| #  | m/z       | I %   | I     |
|----|-----------|-------|-------|
| 1  | 607.3971  | 6.0   | 3814  |
| 2  | 647.4630  | 4.9   | 3098  |
| 3  | 663.4573  | 20.9  | 13369 |
| 4  | 664.4605  | 9.4   | 6017  |
| 5  | 685.4387  | 20.9  | 13328 |
| 6  | 686.4417  | 9.3   | 5963  |
| 7  | 825.2862  | 28.8  | 18419 |
| 8  | 826.3160  | 67.7  | 43242 |
| 9  | 826.8194  | 78.7  | 50229 |
| 10 | 827.3185  | 57.9  | 36976 |
| 11 | 827.8223  | 21.3  | 13606 |
| 12 | 828.3156  | 10.3  | 6586  |
| 13 | 835.3230  | 5.2   | 3350  |
| 14 | 835.8253  | 5.9   | 3797  |
| 15 | 840.3322  | 11.0  | 7056  |
| 16 | 840.8348  | 12.5  | 7960  |
| 17 | 841.3356  | 8.4   | 5333  |
| 18 | 842.3111  | 4.6   | 2933  |
| 19 | 870.3425  | 20.6  | 13176 |
| 20 | 871.3462  | 12.6  | 8019  |
| 21 | 872.3572  | 30.0  | 19159 |
| 22 | 873.3606  | 18.1  | 11555 |
| 23 | 874.3633  | 5.7   | 3661  |
| 24 | 896.3579  | 6.0   | 3806  |
| 25 | 898.3727  | 23.2  | 14811 |
| 26 | 899.3757  | 16.1  | 10281 |
| 27 | 900.3836  | 12.6  | 8035  |
| 28 | 901.3898  | 5.8   | 3700  |
| 29 | 916.3809  | 5.1   | 3274  |
| 30 | 967.3555  | 4.5   | 2878  |
| 31 | 1157.5397 | 61.1  | 39000 |
| 32 | 1158.0419 | 100.0 | 63862 |
| 33 | 1158.5437 | 89.6  | 57217 |
| 34 | 1159.0451 | 51.4  | 32843 |
| 35 | 1159.5456 | 22.5  | 14400 |
| 36 | 1160.0467 | 9.8   | 6243  |
| 37 | 1171.5535 | 7.0   | 4465  |
| 38 | 1172.0563 | 9.4   | 6000  |
| 39 | 1172.5586 | 7.9   | 5033  |
| 40 | 1173.0597 | 4.6   | 2944  |
| 41 | 1280.2116 | 6.5   | 4169  |
| 42 | 1280.7137 | 7.3   | 4645  |
| 43 | 1281.2143 | 4.4   | 2830  |
| 44 | 1294.2270 | 7.1   | 4518  |
| 45 | 1294.7285 | 7.4   | 4720  |
| 46 | 1295.2299 | 4.5   | 2850  |
| 47 | 1399.3271 | 7.5   | 4804  |
| 48 | 1399.8298 | 7.5   | 4760  |
| 49 | 1400.3307 | 5.4   | 3424  |
| 50 | 1412.8400 | 5.2   | 3305  |
| 51 | 1413.3432 | 10.9  | 6975  |
| 52 | 1413.8452 | 10.2  | 6521  |
| 53 | 1414.3456 | 8.6   | 5498  |
| 54 | 1414.7079 | 13.0  | 8318  |
| 55 | 1415.2095 | 22.7  | 14480 |
| 56 | 1415.7114 | 23.2  | 14819 |
| 57 | 1416.2129 | 16.6  | 10574 |
| 58 | 1416.7157 | 9.0   | 5777  |
| 59 | 1422.3484 | 4.9   | 3146  |
| 60 | 1427.3584 | 7.5   | 4781  |
| 61 | 1427.8596 | 7.8   | 4955  |
| 62 | 1428.3635 | 5.0   | 3223  |

## High Resolution Mass Spectrometry Report

| #   | m/z       | I%   | I     |
|-----|-----------|------|-------|
| 63  | 1488.7635 | 40.9 | 26126 |
| 64  | 1489.2652 | 86.5 | 55251 |
| 65  | 1489.7671 | 94.0 | 60049 |
| 66  | 1490.2684 | 72.5 | 46277 |
| 67  | 1490.7696 | 39.7 | 25380 |
| 68  | 1491.2715 | 18.6 | 11905 |
| 69  | 1491.7731 | 6.8  | 4319  |
| 70  | 1592.7523 | 5.2  | 3300  |
| 71  | 1593.2536 | 6.2  | 3991  |
| 72  | 1611.9358 | 5.6  | 3585  |
| 73  | 1612.4393 | 4.4  | 2832  |
| 74  | 1625.9515 | 5.1  | 3265  |
| 75  | 1651.6241 | 39.9 | 25502 |
| 76  | 1652.1277 | 26.9 | 17173 |
| 77  | 1652.6293 | 66.0 | 42118 |
| 78  | 1653.1309 | 26.1 | 16683 |
| 79  | 1653.6319 | 39.6 | 25299 |
| 80  | 1654.1344 | 9.1  | 5832  |
| 81  | 1654.6351 | 14.6 | 9355  |
| 82  | 1666.1408 | 4.9  | 3155  |
| 83  | 1666.6407 | 6.0  | 3823  |
| 84  | 1667.1436 | 5.5  | 3505  |
| 85  | 1679.6540 | 5.3  | 3409  |
| 86  | 1680.6565 | 6.5  | 4120  |
| 87  | 1681.6598 | 4.5  | 2848  |
| 88  | 1746.4335 | 5.7  | 3614  |
| 89  | 1746.9362 | 6.8  | 4352  |
| 90  | 1747.4355 | 6.6  | 4216  |
| 91  | 1747.9371 | 4.7  | 2993  |
| 92  | 1983.3501 | 6.0  | 3861  |
| 93  | 1983.8516 | 7.3  | 4663  |
| 94  | 1984.3540 | 8.0  | 5119  |
| 95  | 1984.8558 | 5.9  | 3783  |
| 96  | 1985.3557 | 4.4  | 2825  |
| 97  | 2314.0632 | 4.8  | 3080  |
| 98  | 2315.0695 | 8.4  | 5382  |
| 99  | 2316.0720 | 7.4  | 4714  |
| 100 | 2317.0783 | 4.4  | 2798  |

### Acquisition Parameter

|                   |                              |                |                                       |                |              |           |
|-------------------|------------------------------|----------------|---------------------------------------|----------------|--------------|-----------|
| <b>General</b>    | Fore Vacuum                  | 2.61e+000 mBar | High Vacuum                           | 9.50e-008 mBar | Source Type  | ESI       |
|                   | Scan Begin                   | 500 m/z        | Scan End                              | 3500 m/z       | Ion Polarity | Positive  |
| <b>Source</b>     | Set Nebulizer                | 0.4 Bar        | Set Capillary                         | 3600 V         | Set Dry Gas  | 4.0 l/min |
|                   | Set Dry Heater               | 180 °C         | Set End Plate Offset                  | -500 V         |              |           |
| <b>Quadrupole</b> | Set Ion Energy ( MS only )   | 4.0 eV         |                                       |                |              |           |
| <b>Coll. Cell</b> | Collision Energy             | 70.0 eV        | Set Collision Cell RF                 | 2000.0 Vpp     |              | 300.0 Vpp |
| <b>Ion Cooler</b> | Set Ion Cooler Transfer Time | 142.0 µs       | Set Ion Cooler Pre Pulse Storage Time |                |              | 22.0 µs   |

### $^1\text{H-NMR}$ spectra of $\text{O}_{\text{M-C}}$ in $\text{THF-d}_8$

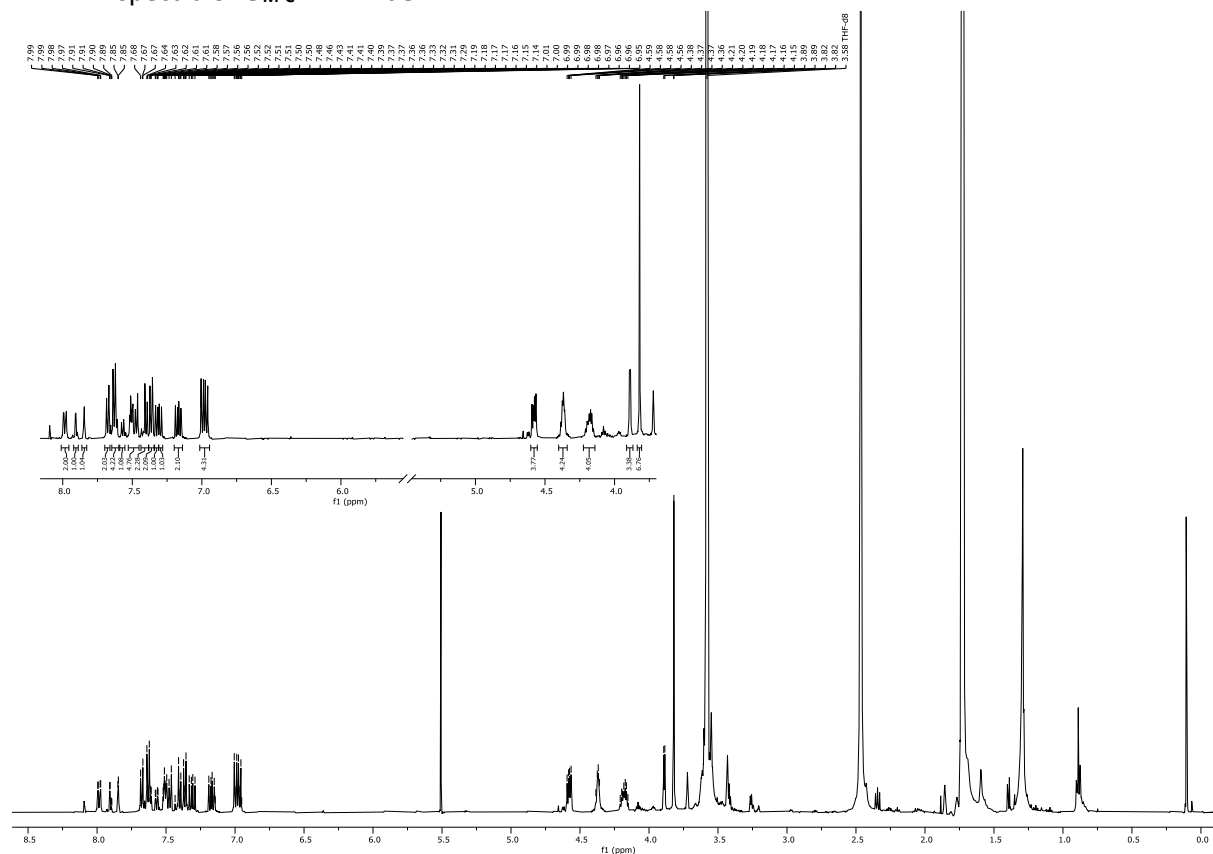

### COSY spectra of $\text{O}_{\text{M-C}}$ in $\text{THF-d}_8$

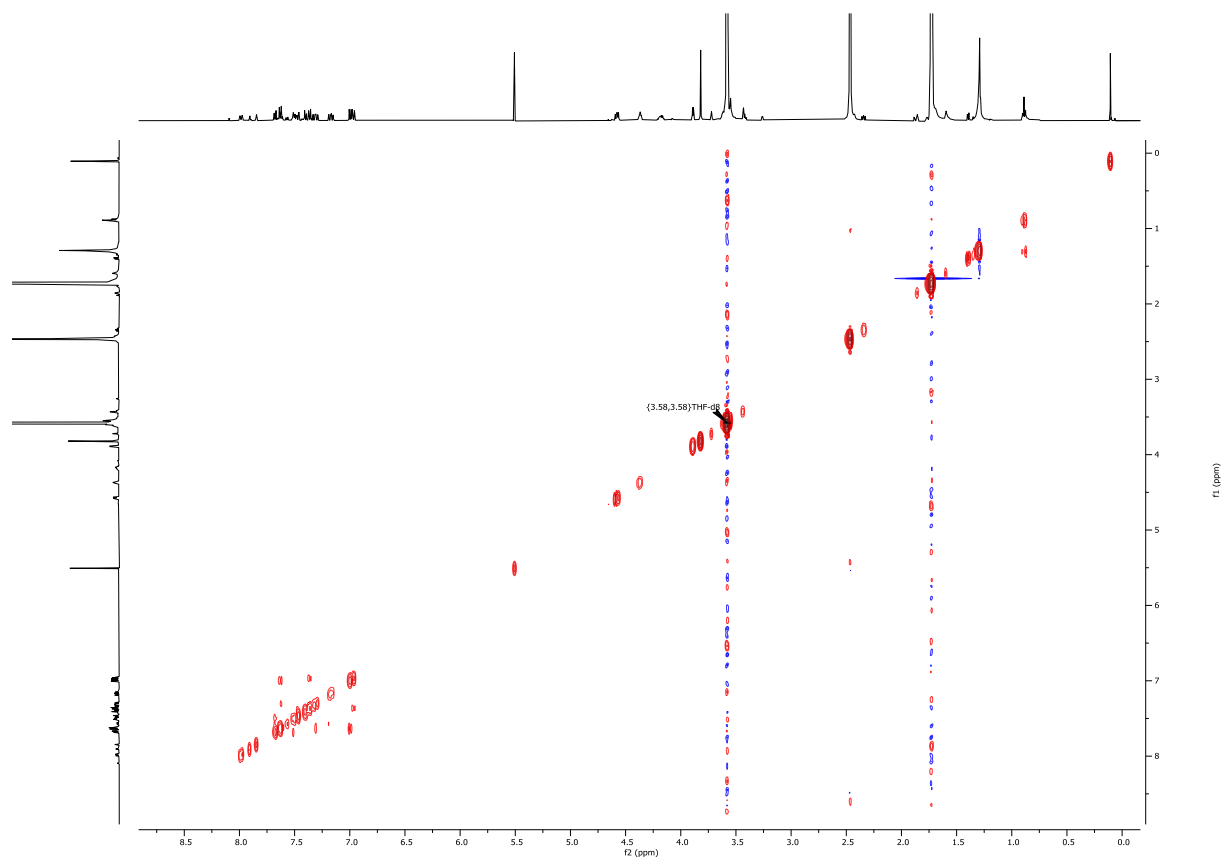

### NOESY spectra of $O_{M-c}$ in THF-d8

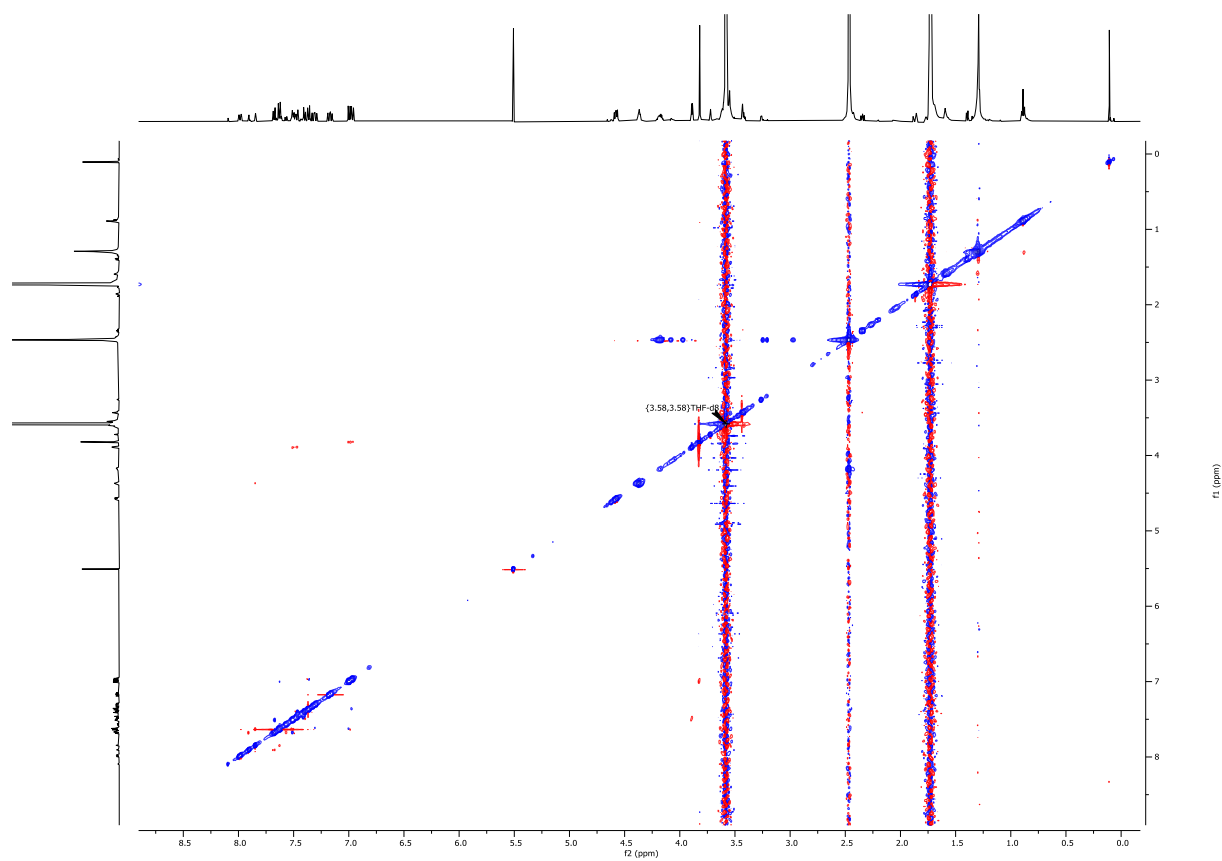

### HMQC spectra of $O_{M-c}$ in THF-d8

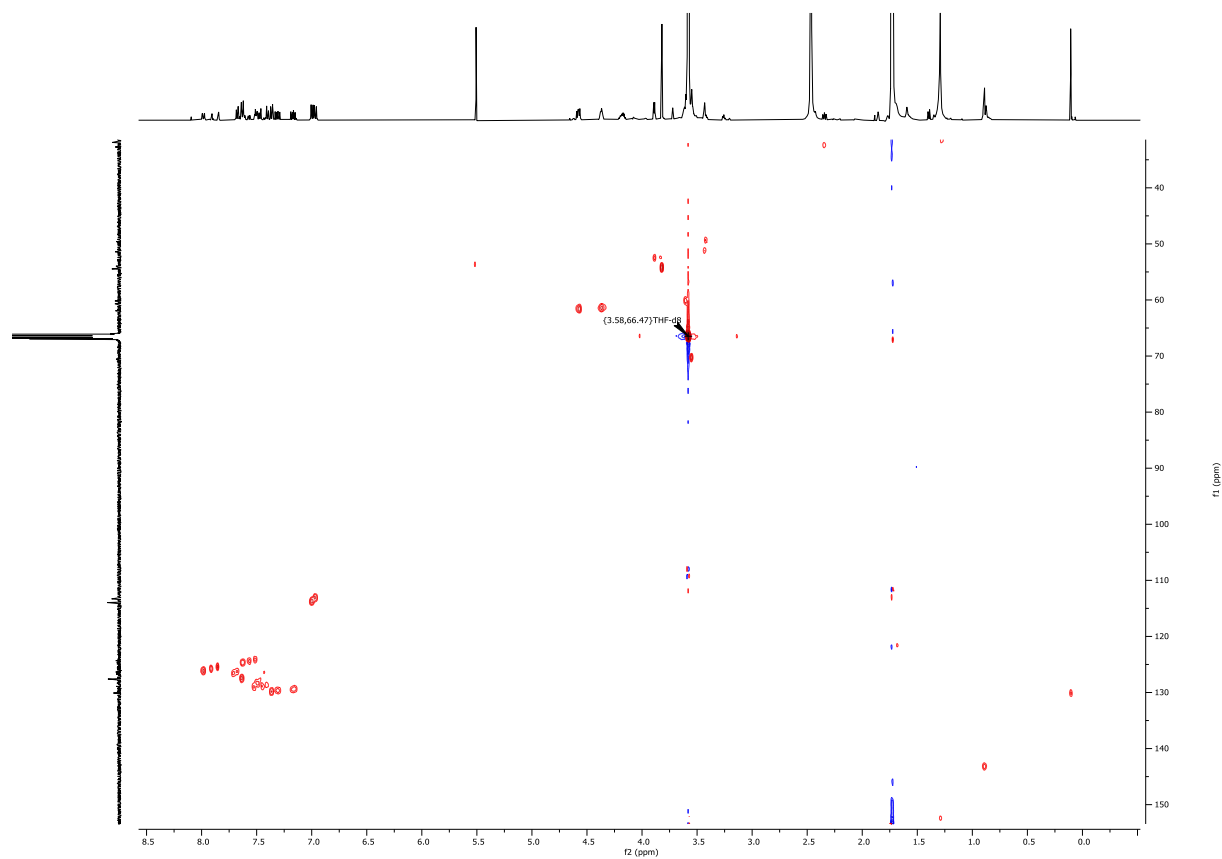

# LC-MS of O<sub>M</sub>-c

X:\LC-ESI-MS\O...ofraction4.lcd Injection 1 PDA - Total Absorbance Chromatogram

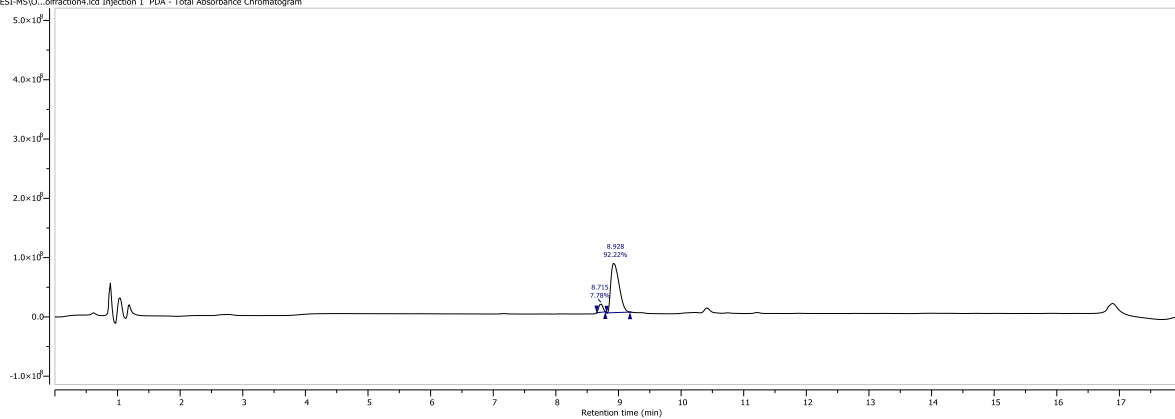

X:\LC-ESI-MS\O...ofraction4.lcd Injection 1 Event 1: MS(+)...(0 - 2000.00 Da) MS + spectrum 8.93

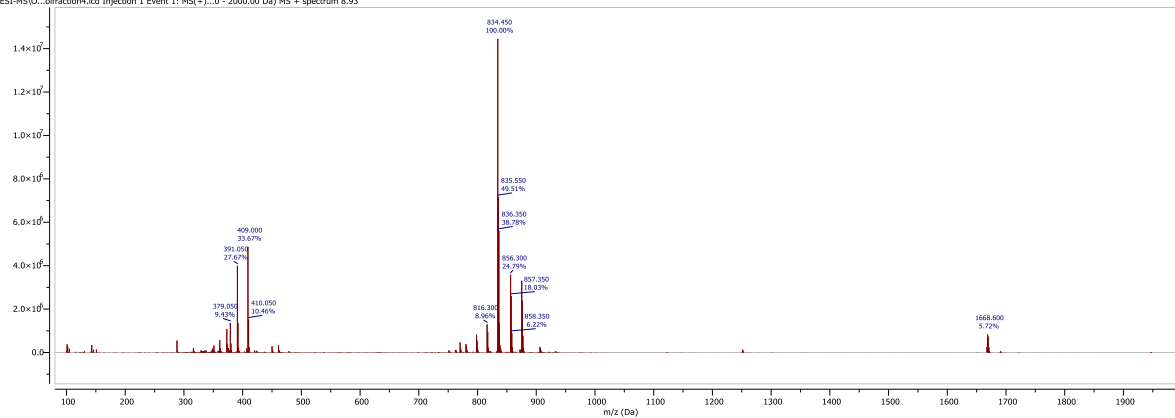

## High Resolution Mass Spectrometry Report

Sample Name **KR0511**  
Comment

Instrument **maXis 4G**  
Method **ms\_nocolumn\_75-1000\_pos.m**

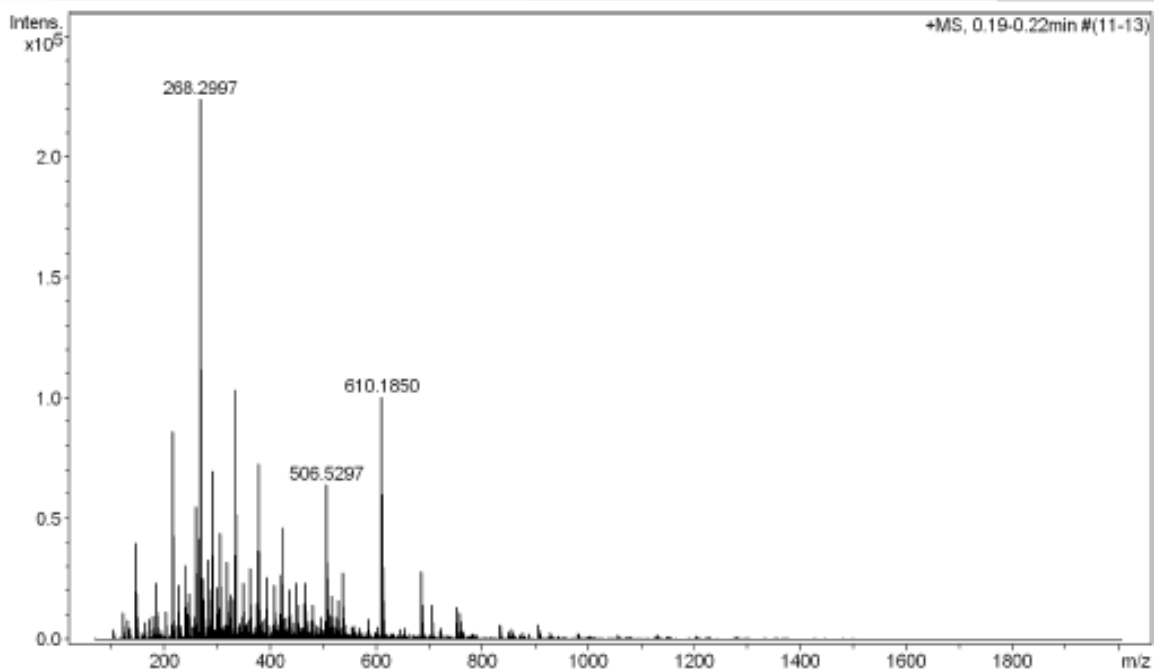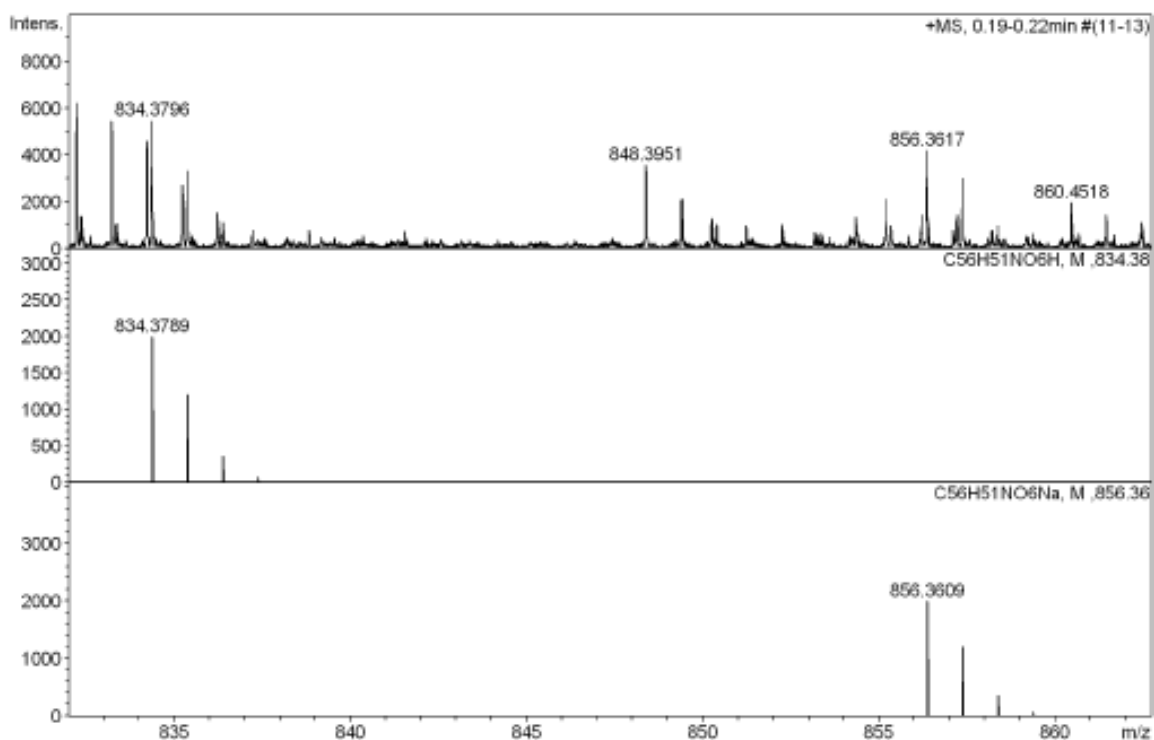

---

# High Resolution Mass Spectrometry Report

---

## Measured m/z vs. theoretical m/z

| Meas. m/z | # | Formula            | Score  | m/z      | err [mDa] | err [ppm] | mSigma | rdb  | e <sup>-</sup> Conf | z  |
|-----------|---|--------------------|--------|----------|-----------|-----------|--------|------|---------------------|----|
| 834.3796  | 1 | C 56 H 52 N O 6    | 100.00 | 834.3789 | -0.7      | -0.8      | 20.8   | 31.5 | even                | 1+ |
| 856.3617  | 1 | C 56 H 51 N Na O 6 | 100.00 | 856.3609 | -0.8      | -0.9      | 102.3  | 31.5 | even                |    |

## Mass list

| #  | m/z      | I%    | I      |
|----|----------|-------|--------|
| 1  | 122.0959 | 4.9   | 10939  |
| 2  | 131.9617 | 3.4   | 7715   |
| 3  | 144.9818 | 17.9  | 40132  |
| 4  | 146.9799 | 8.5   | 18946  |
| 5  | 150.1271 | 4.1   | 9261   |
| 6  | 173.0780 | 3.7   | 8379   |
| 7  | 178.1585 | 4.3   | 9564   |
| 8  | 186.0082 | 10.6  | 23682  |
| 9  | 188.0064 | 4.5   | 10147  |
| 10 | 205.0596 | 5.2   | 11699  |
| 11 | 217.1043 | 38.5  | 86283  |
| 12 | 218.1076 | 3.5   | 7898   |
| 13 | 226.9511 | 10.1  | 22557  |
| 14 | 227.0353 | 5.3   | 11926  |
| 15 | 240.2681 | 6.0   | 13392  |
| 16 | 242.2838 | 13.8  | 30922  |
| 17 | 245.0990 | 4.8   | 10747  |
| 18 | 247.1148 | 8.4   | 18711  |
| 19 | 259.1147 | 4.2   | 9400   |
| 20 | 261.1307 | 24.6  | 55151  |
| 21 | 266.0710 | 3.4   | 7651   |
| 22 | 266.2839 | 18.6  | 41680  |
| 23 | 267.2871 | 4.0   | 9008   |
| 24 | 268.2997 | 100.0 | 223998 |
| 25 | 269.3029 | 19.8  | 44335  |
| 26 | 270.3145 | 7.2   | 16082  |
| 27 | 273.1666 | 11.3  | 25360  |
| 28 | 274.2736 | 7.0   | 15737  |
| 29 | 275.1097 | 7.4   | 16666  |
| 30 | 282.2788 | 14.8  | 33123  |
| 31 | 284.2941 | 3.7   | 8337   |
| 32 | 289.1256 | 9.3   | 20832  |
| 33 | 291.1412 | 31.2  | 69791  |
| 34 | 292.1445 | 3.9   | 8798   |
| 35 | 299.1098 | 9.6   | 21556  |
| 36 | 301.1253 | 3.4   | 7698   |
| 37 | 303.1413 | 5.8   | 13026  |
| 38 | 305.1207 | 4.8   | 10797  |
| 39 | 305.1569 | 19.7  | 44113  |
| 40 | 319.1362 | 14.4  | 32257  |
| 41 | 320.2557 | 5.2   | 11615  |
| 42 | 324.3620 | 8.3   | 18555  |
| 43 | 331.1363 | 7.5   | 16861  |
| 44 | 333.1518 | 15.5  | 34747  |
| 45 | 335.1676 | 46.4  | 103828 |
| 46 | 336.1709 | 6.8   | 15172  |
| 47 | 347.1674 | 4.1   | 9166   |
| 48 | 349.1468 | 10.5  | 23564  |
| 49 | 349.1833 | 9.5   | 21172  |
| 50 | 361.1466 | 3.6   | 8026   |
| 51 | 363.1626 | 13.2  | 29661  |
| 52 | 365.1777 | 4.2   | 9400   |
| 53 | 375.1626 | 6.6   | 14789  |
| 54 | 377.1783 | 16.4  | 36756  |
| 55 | 379.1939 | 32.7  | 73164  |
| 56 | 380.1976 | 5.7   | 12670  |
| 57 | 385.2922 | 3.4   | 7630   |
| 58 | 391.1579 | 3.7   | 8323   |
| 59 | 393.1731 | 11.6  | 25877  |
| 60 | 407.1888 | 10.2  | 22793  |
| 61 | 409.2039 | 3.8   | 8462   |



## High Resolution Mass Spectrometry Report

| #   | m/z      | I %  | I      |
|-----|----------|------|--------|
| 62  | 419.1889 | 4.9  | 10889  |
| 63  | 421.2044 | 11.9 | 26600  |
| 64  | 423.2202 | 20.6 | 46201  |
| 65  | 424.2235 | 3.8  | 8427   |
| 66  | 429.3186 | 4.0  | 8999   |
| 67  | 435.1836 | 4.2  | 9418   |
| 68  | 437.1994 | 9.3  | 20781  |
| 69  | 449.1722 | 10.4 | 23406  |
| 70  | 450.1758 | 3.5  | 7776   |
| 71  | 451.2150 | 6.4  | 14411  |
| 72  | 463.2148 | 3.3  | 7497   |
| 73  | 465.2309 | 6.7  | 15032  |
| 74  | 467.2467 | 10.4 | 23307  |
| 75  | 479.2096 | 3.5  | 7880   |
| 76  | 480.2530 | 3.5  | 7886   |
| 77  | 481.2258 | 6.5  | 14493  |
| 78  | 495.2413 | 4.1  | 9279   |
| 79  | 506.5297 | 28.6 | 64102  |
| 80  | 507.5330 | 11.3 | 25316  |
| 81  | 509.2570 | 4.1  | 9244   |
| 82  | 511.2725 | 4.6  | 10259  |
| 83  | 517.1600 | 8.1  | 18177  |
| 84  | 525.2518 | 4.1  | 9166   |
| 85  | 528.5116 | 7.3  | 16384  |
| 86  | 536.1658 | 12.4 | 27711  |
| 87  | 537.1664 | 6.0  | 13378  |
| 88  | 538.1639 | 4.0  | 8931   |
| 89  | 585.1478 | 3.7  | 8388   |
| 90  | 610.1850 | 44.9 | 100609 |
| 91  | 611.1855 | 26.9 | 60149  |
| 92  | 612.1835 | 18.0 | 40362  |
| 93  | 613.1833 | 7.3  | 16346  |
| 94  | 684.2041 | 12.6 | 28301  |
| 95  | 685.2045 | 7.8  | 17541  |
| 96  | 685.4362 | 4.7  | 10589  |
| 97  | 686.2028 | 6.3  | 14122  |
| 98  | 705.5829 | 6.4  | 14430  |
| 99  | 750.4075 | 6.0  | 13407  |
| 100 | 758.2224 | 5.0  | 11135  |

### Acquisition Parameter

|                   |                              |                |                                       |                |              |           |
|-------------------|------------------------------|----------------|---------------------------------------|----------------|--------------|-----------|
| <b>General</b>    | Fore Vacuum                  | 2.39e+000 mBar | High Vacuum                           | 9.94e-008 mBar | Source Type  | ESI       |
|                   | Scan Begin                   | 75 m/z         | Scan End                              | 2000 m/z       | Ion Polarity | Positive  |
| <b>Source</b>     | Set Nebulizer                | 2.0 Bar        | Set Capillary                         | 4500 V         | Set Dry Gas  | 8.0 l/min |
|                   | Set Dry Heater               | 200 °C         | Set End Plate Offset                  | -500 V         |              |           |
| <b>Quadrupole</b> | Set Ion Energy ( MS only )   | 4.0 eV         |                                       |                |              |           |
| <b>Coll. Cell</b> | Collision Energy             | 8.0 eV         | Set Collision Cell RF                 | 500.0 Vpp      |              | 100.0 Vpp |
| <b>Ion Cooler</b> | Set Ion Cooler Transfer Time | 75.0 µs        | Set Ion Cooler Pre Pulse Storage Time |                |              | 10.0 µs   |
